# Supplementary material for: Proteome-wide analysis of protein alterations in response to aristolochic acids in rat kidney and liver tissues
Source: Royal Society of Chemistry journal article supplement (doi:10.1039/d1mo00015b), 2021-05-06
Supplement: d1mo00015b1.xlsx [file d1mo00015b1.xlsx]

## Sheet: liver
Protein ID	Protein Name	LC1	LC2	LC3	LA1	LA2	LA3	pValue	Lof2FC	Ranking	FDR
sp|Q99MS0|S14L2_RAT,sp|Q9Z1J8|S14L3_RAT	SEC14-like protein 2 OS=Rattus norvegicus OX=10116 GN=Sec14l2 PE=1 SV=1,SEC14-like protein 3 OS=Rattus norvegicus OX=10116 GN=Sec14l3 PE=1 SV=1	0.000134238	0.000134931	0.000145426	1.44039e-06	2.13925e-06	1.17e-06	2.97927e-06	-6.44774	1	0.00489196
sp|D3ZQL7|TPPP_RAT	Tubulin polymerization-promoting protein OS=Rattus norvegicus OX=10116 GN=Tppp PE=1 SV=1	0.000124078	0.000124719	0.000134419	1.44039e-06	2.13925e-06	1.17e-06	2.99701e-06	-6.33419	2	0.00246055
sp|Q5U1Y4|AKCL2_RAT	1,5-anhydro-D-fructose reductase OS=Rattus norvegicus OX=10116 GN=Akr1e2 PE=2 SV=1	8.98637e-05	9.03277e-05	9.73532e-05	1.44039e-06	2.13925e-06	1.17e-06	3.09584e-06	-5.86876	3	0.00169446
sp|O35162|HSP13_RAT	Heat shock 70 kDa protein 13 OS=Rattus norvegicus OX=10116 GN=Hspa13 PE=1 SV=2	1.33575e-06	2.151e-06	1.44708e-06	0.000110155	0.000123813	0.00012062	9.40647e-06	6.16729	4	0.00386136
sp|Q5BJX1|RM41_RAT	39S ribosomal protein L41, mitochondrial OS=Rattus norvegicus OX=10116 GN=Mrpl41 PE=1 SV=1	0.00100929	0.0010145	0.00109341	0.000387185	0.000435194	0.000423969	3.52802e-05	-1.32254	5	0.011586
sp|P09118|URIC_RAT	Uricase OS=Rattus norvegicus OX=10116 GN=Uox PE=1 SV=3	0.00160687	0.00152544	0.00154737	0.00291092	0.00269447	0.00271872	7.49949e-05	0.830887	6	0.0205236
sp|P08683|CP2CB_RAT	Cytochrome P450 2C11 OS=Rattus norvegicus OX=10116 GN=Cyp2c11 PE=1 SV=1	1.33575e-06	2.151e-06	0.00017582	0.000985774	0.000991371	0.00102261	9.15632e-05	4.06435	7	0.0214781
sp|Q6P747|HP1B3_RAT	Heterochromatin protein 1-binding protein 3 OS=Rattus norvegicus OX=10116 GN=Hp1bp3 PE=1 SV=1	0.000391305	0.000393326	0.000317938	1.44039e-06	2.13925e-06	1.17e-06	0.000122801	-7.85883	8	0.0252049
sp|P62716|PP2AB_RAT,sp|P63331|PP2AA_RAT	Serine/threonine-protein phosphatase 2A catalytic subunit beta isoform OS=Rattus norvegicus OX=10116 GN=Ppp2cb PE=2 SV=1,Serine/threonine-protein phosphatase 2A catalytic subunit alpha isoform OS=Rattus norvegicus OX=10116 GN=Ppp2ca PE=1 SV=1	0.000350148	0.000263967	0.000284498	1.44039e-06	2.13925e-06	1.17e-06	0.000330495	-7.56374	9	0.0602969
sp|Q63797|PSME1_RAT	Proteasome activator complex subunit 1 OS=Rattus norvegicus OX=10116 GN=Psme1 PE=2 SV=1	0.00152083	0.00163787	0.00164758	0.00229201	0.00222491	0.00216752	0.000324129	0.475889	10	0.053222
sp|Q5M827|PIR_RAT	Pirin OS=Rattus norvegicus OX=10116 GN=Pir PE=1 SV=1	0.000371807	0.000467159	0.000503493	1.44039e-06	2.13925e-06	1.17e-06	0.000342923	-8.14284	11	0.0511891
sp|P97519|HMGCL_RAT	Hydroxymethylglutaryl-CoA lyase, mitochondrial OS=Rattus norvegicus OX=10116 GN=Hmgcl PE=2 SV=1	0.000749048	0.000752916	0.000811476	0.000558738	0.000538301	0.000524417	0.000512301	-0.512749	12	0.0700999
sp|P21775|THIKA_RAT	3-ketoacyl-CoA thiolase A, peroxisomal OS=Rattus norvegicus OX=10116 GN=Acaa1a PE=1 SV=3	0.00311624	0.00332027	0.00303836	0.00185296	0.00181398	0.00209445	0.000522701	-0.717692	13	0.0660211
sp|P05179|CP2C7_RAT	Cytochrome P450 2C7 OS=Rattus norvegicus OX=10116 GN=Cyp2c7 PE=1 SV=2	1.33575e-06	2.151e-06	1.44708e-06	0.000370592	0.000416543	0.000521742	0.000628373	8.05141	14	0.0736992
sp|P46462|TERA_RAT	Transitional endoplasmic reticulum ATPase OS=Rattus norvegicus OX=10116 GN=Vcp PE=1 SV=3	0.00204713	0.0021589	0.00210867	0.00164145	0.00148322	0.0015507	0.000621747	-0.433633	15	0.0680606
sp|D4A1W8|MTP_RAT	Microsomal triglyceride transfer protein large subunit OS=Rattus norvegicus OX=10116 GN=Mttp PE=1 SV=1	0.000120754	9.10334e-05	0.000130818	1.44039e-06	2.13925e-06	1.17e-06	0.000705958	-6.17259	16	0.072449
sp|P08541|UD2B2_RAT	UDP-glucuronosyltransferase 2B2 OS=Rattus norvegicus OX=10116 GN=Ugt2b PE=1 SV=1	1.33575e-06	2.151e-06	1.44708e-06	0.000293676	0.00022006	0.000214384	0.000702434	7.20533	17	0.0678469
sp|A7VJC2|ROA2_RAT	Heterogeneous nuclear ribonucleoproteins A2/B1 OS=Rattus norvegicus OX=10116 GN=Hnrnpa2b1 PE=1 SV=1	0.00275853	0.0028498	0.00249037	0.00146977	0.00132161	0.00112658	0.000684773	-1.04759	18	0.0624665
sp|Q6SKG1|ACSM3_RAT	Acyl-coenzyme A synthetase ACSM3, mitochondrial OS=Rattus norvegicus OX=10116 GN=Acsm3 PE=2 SV=1	0.000139908	0.000187508	0.000202092	1.44039e-06	2.13925e-06	1.17e-06	0.000739086	-6.80069	19	0.0638726
sp|Q5FVR5|ACNT2_RAT	Acyl-coenzyme A amino acid N-acyltransferase 2 OS=Rattus norvegicus OX=10116 GN=Acnat2 PE=2 SV=1	1.33575e-06	2.151e-06	1.44708e-06	0.000186182	0.000139512	0.00020387	0.000805638	6.74596	20	0.0661429
sp|P62909|RS3_RAT	40S ribosomal protein S3 OS=Rattus norvegicus OX=10116 GN=Rps3 PE=1 SV=1	0.00211494	0.00201397	0.00205003	0.000640529	0.000959934	0.00105207	0.000784287	-1.21999	21	0.0613238
sp|Q64611|CSAD_RAT	Cysteine sulfinic acid decarboxylase OS=Rattus norvegicus OX=10116 GN=Csad PE=1 SV=1	5.4866e-05	5.51494e-05	5.94387e-05	0.000315717	0.00029572	0.000230474	0.000963231	2.31277	22	0.0718921
sp|P19814|TGON3_RAT	Trans-Golgi network integral membrane protein TGN38 OS=Rattus norvegicus OX=10116 GN=Ttgn1 PE=1 SV=1	1.33575e-06	2.151e-06	1.44708e-06	0.000217995	0.000245025	0.000318274	0.000987437	7.30701	23	0.0704944
sp|Q9JHL4|DBNL_RAT	Drebrin-like protein OS=Rattus norvegicus OX=10116 GN=Dbnl PE=1 SV=1	0.000868545	0.000935389	0.000806513	0.000535488	0.000468133	0.00052121	0.00104187	-0.775648	24	0.0712815
sp|Q8VIF7|SBP1_RAT	Methanethiol oxidase OS=Rattus norvegicus OX=10116 GN=Selenbp1 PE=1 SV=1	0.00424073	0.00443544	0.00440791	0.00538614	0.00586866	0.00565711	0.00111088	0.370228	25	0.0729623
sp|Q5M7W5|MAP4_RAT	Microtubule-associated protein 4 OS=Rattus norvegicus OX=10116 GN=Map4 PE=1 SV=1	0.00081889	0.000797396	0.000942585	0.000466308	0.000468955	0.000483734	0.00113034	-0.850636	26	0.0713851
sp|O88884|AKAP1_RAT	A-kinase anchor protein 1, mitochondrial OS=Rattus norvegicus OX=10116 GN=Akap1 PE=1 SV=1	0.000126693	0.000159184	0.000171565	1.44039e-06	2.13925e-06	3.32622e-05	0.00118003	-3.63417	27	0.071763
sp|P12749|RL26_RAT	60S ribosomal protein L26 OS=Rattus norvegicus OX=10116 GN=Rpl26 PE=1 SV=1	0.000932723	0.000750031	0.000606275	1.44039e-06	2.13925e-06	1.17e-06	0.00128633	-8.9127	28	0.0754339
sp|O88797|DAB2_RAT	Disabled homolog 2 OS=Rattus norvegicus OX=10116 GN=Dab2 PE=1 SV=1	0.00010566	0.000106206	0.000152621	1.44039e-06	2.13925e-06	1.17e-06	0.00152812	-6.26191	29	0.0865233
sp|A0FKI7|ACBD5_RAT	Acyl-CoA-binding domain-containing protein 5 OS=Rattus norvegicus OX=10116 GN=Acbd5 PE=1 SV=1	0.000160369	0.000107465	0.000115823	1.44039e-06	2.13925e-06	1.17e-06	0.00153755	-6.33586	30	0.0841553
sp|Q99N27|SNX1_RAT	Sorting nexin-1 OS=Rattus norvegicus OX=10116 GN=Snx1 PE=1 SV=1	0.000155454	0.000104171	0.000112273	1.44039e-06	2.13925e-06	1.17e-06	0.00153992	-6.29095	31	0.0815661
sp|B0BNC9|QORL2_RAT	Quinone oxidoreductase-like protein 2 OS=Rattus norvegicus OX=10116 PE=2 SV=1	0.000231848	0.000155364	0.000167447	1.44039e-06	2.13925e-06	1.17e-06	0.00151478	-6.86764	32	0.0777272
sp|O08651|SERA_RAT	D-3-phosphoglycerate dehydrogenase OS=Rattus norvegicus OX=10116 GN=Phgdh PE=1 SV=3	0.000101497	0.000153032	0.000109956	1.44039e-06	2.13925e-06	1.17e-06	0.0016792	-6.2619	33	0.0835532
sp|P11232|THIO_RAT	Thioredoxin OS=Rattus norvegicus OX=10116 GN=Txn PE=1 SV=2	0.00412175	0.00491985	0.00502342	0.00840008	0.00805316	0.00730438	0.00169275	0.756279	34	0.0817499
sp|P24050|RS5_RAT	40S ribosomal protein S5 OS=Rattus norvegicus OX=10116 GN=Rps5 PE=1 SV=3	0.000397779	0.000266555	0.000430931	1.44039e-06	2.13925e-06	1.17e-06	0.00192862	-7.84925	35	0.09048
sp|Q5I0G4|GARS_RAT	Glycine--tRNA ligase OS=Rattus norvegicus OX=10116 GN=Gars1 PE=1 SV=2	7.43103e-05	0.000112041	0.000120755	1.44039e-06	2.13925e-06	1.17e-06	0.00211216	-6.01478	36	0.0963379
sp|Q99P39|NFS1_RAT	Cysteine desulfurase, mitochondrial OS=Rattus norvegicus OX=10116 GN=Nfs1 PE=2 SV=1	0.000119951	0.000180856	0.000194922	1.44039e-06	2.13925e-06	1.17e-06	0.00206446	-6.70559	37	0.0916173
sp|P30839|AL3A2_RAT	Aldehyde dehydrogenase family 3 member A2 OS=Rattus norvegicus OX=10116 GN=Aldh3a2 PE=1 SV=1	0.000335318	0.000337049	0.000363264	0.00026799	0.000240975	0.00023476	0.00203631	-0.477669	38	0.0879899
sp|P61751|ARF4_RAT	ADP-ribosylation factor 4 OS=Rattus norvegicus OX=10116 GN=Arf4 PE=2 SV=2	0.00120218	0.00151048	0.00113957	0.000432357	0.000323978	0.000473432	0.0020708	-1.64731	39	0.0871859
sp|P04937|FINC_RAT	Fibronectin OS=Rattus norvegicus OX=10116 GN=Fn1 PE=1 SV=2	0.000578763	0.000625657	0.000591508	0.000722631	0.000729832	0.000699541	0.00207851	0.260952	40	0.0853228
sp|Q6UPE0|CHDH_RAT	Choline dehydrogenase, mitochondrial OS=Rattus norvegicus OX=10116 GN=Chdh PE=1 SV=1	0.000812824	0.000817021	0.000733806	0.00125593	0.00116827	0.00109071	0.00219855	0.57247	41	0.0880492
sp|P62332|ARF6_RAT	ADP-ribosylation factor 6 OS=Rattus norvegicus OX=10116 GN=Arf6 PE=1 SV=2	0.000463696	0.000776818	0.00066979	1.44039e-06	2.13925e-06	1.17e-06	0.00229759	-8.65177	42	0.0898249
sp|Q7TMD5|ZC3HE_RAT	Zinc finger CCCH domain-containing protein 14 OS=Rattus norvegicus OX=10116 GN=Zc3h14 PE=1 SV=1	0.000330762	0.00033247	0.000238886	1.44039e-06	7.92336e-05	1.17e-06	0.0024818	-3.46237	43	0.0947703
sp|P17425|HMCS1_RAT	Hydroxymethylglutaryl-CoA synthase, cytoplasmic OS=Rattus norvegicus OX=10116 GN=Hmgcs1 PE=1 SV=1	0.000364121	0.000470573	0.000507173	0.000149662	0.000168219	0.00016388	0.00269115	-1.47785	44	0.100429
sp|P04636|MDHM_RAT	Malate dehydrogenase, mitochondrial OS=Rattus norvegicus OX=10116 GN=Mdh2 PE=1 SV=2	0.00312103	0.00353935	0.00398802	0.00191874	0.00189786	0.00193295	0.0028608	-0.889117	45	0.104387
sp|P24483|ADX_RAT	Adrenodoxin, mitochondrial OS=Rattus norvegicus OX=10116 GN=Fdx1 PE=2 SV=1	0.000863265	0.000723102	0.000779343	0.000275973	0.000310191	0.000453286	0.00286904	-1.18645	46	0.102412
sp|P11711|CP2A1_RAT	Cytochrome P450 2A1 OS=Rattus norvegicus OX=10116 GN=Cyp2a1 PE=1 SV=2	1.33575e-06	2.151e-06	1.44708e-06	0.000263632	0.000355585	0.000461885	0.00331682	7.77558	47	0.115877
sp|P07872|ACOX1_RAT	Peroxisomal acyl-coenzyme A oxidase 1 OS=Rattus norvegicus OX=10116 GN=Acox1 PE=1 SV=1	0.00065474	0.000740387	0.000620645	0.00027472	0.00022056	0.000386768	0.00335447	-1.1924	48	0.114751
sp|Q64602|AADAT_RAT	Kynurenine/alpha-aminoadipate aminotransferase, mitochondrial OS=Rattus norvegicus OX=10116 GN=Aadat PE=1 SV=1	1.33575e-06	2.151e-06	1.44708e-06	0.000244155	0.000343035	0.000200512	0.00346493	7.3188	49	0.11611
sp|Q6PTT0|ACY1B_RAT	Aminoacylase-1B OS=Rattus norvegicus OX=10116 GN=Acy1b PE=1 SV=1	0.000530372	0.000533111	0.000574575	0.000890147	0.000929053	0.000765846	0.00352678	0.658205	50	0.11582
sp|P50237|ST1C1_RAT	Sulfotransferase 1C1 OS=Rattus norvegicus OX=10116 GN=Sult1c1 PE=1 SV=1	0.0011567	0.00107324	0.0012531	0.00179201	0.0020142	0.00168193	0.00379208	0.655971	51	0.12209
sp|P00481|OTC_RAT	Ornithine transcarbamylase, mitochondrial OS=Rattus norvegicus OX=10116 GN=Otc PE=1 SV=1	0.000534866	0.000460824	0.000331111	7.32809e-05	2.13925e-06	8.02428e-05	0.00377446	-3.09146	52	0.119186
sp|Q63965|SFXN1_RAT	Sideroflexin-1 OS=Rattus norvegicus OX=10116 GN=Sfxn1 PE=2 SV=4	1.33575e-06	2.151e-06	1.44708e-06	0.000322254	0.000271658	0.000176434	0.00395812	7.28666	53	0.122627
sp|P01836|KACA_RAT	Ig kappa chain C region, A allele OS=Rattus norvegicus OX=10116 PE=1 SV=1	0.000765537	0.00102599	0.000829339	0.00146838	0.00137538	0.0013399	0.00395121	0.674725	54	0.120146
sp|P06214|HEM2_RAT	Delta-aminolevulinic acid dehydratase OS=Rattus norvegicus OX=10116 GN=Alad PE=1 SV=1	0.0017213	0.00156541	0.00168716	0.00204387	0.00194387	0.00197981	0.00399113	0.26277	55	0.119153
sp|P02803|MT1_RAT	Metallothionein-1 OS=Rattus norvegicus OX=10116 GN=Mt1 PE=1 SV=1	0.0017737	0.00133715	0.00240191	1.44039e-06	2.13925e-06	1.17e-06	0.00402499	-10.1807	56	0.118018
sp|Q7M767|UB2V2_RAT	Ubiquitin-conjugating enzyme E2 variant 2 OS=Rattus norvegicus OX=10116 GN=Ube2v2 PE=1 SV=3	0.00111927	0.000937539	0.000606275	1.44039e-06	2.13925e-06	1.17e-06	0.00412713	-9.13106	57	0.11889
sp|Q6P9T8|TBB4B_RAT	Tubulin beta-4B chain OS=Rattus norvegicus OX=10116 GN=Tubb4b PE=1 SV=1	0.00237058	0.00232173	0.00230475	0.0025067	0.00262094	0.00255334	0.0041095	0.134541	58	0.116341
sp|Q9ESN0|NIBA1_RAT	Protein Niban 1 OS=Rattus norvegicus OX=10116 GN=Niban1 PE=1 SV=2	0.000144338	0.00026115	0.000250188	1.44039e-06	2.13925e-06	1.17e-06	0.00432508	-7.10902	59	0.120369
sp|Q923M1|MSRA_RAT	Mitochondrial peptide methionine sulfoxide reductase OS=Rattus norvegicus OX=10116 GN=Msra PE=1 SV=1	0.00046436	0.000466758	0.000754592	1.44039e-06	2.13925e-06	1.17e-06	0.00435175	-8.47132	60	0.119093
sp|Q5BJP2|CWC15_RAT	Spliceosome-associated protein CWC15 homolog OS=Rattus norvegicus OX=10116 GN=Cwc15 PE=1 SV=1	0.000236235	0.000237455	0.000383886	1.44039e-06	2.13925e-06	1.17e-06	0.00439551	-7.4963	61	0.118318
sp|Q9Z144|LEG2_RAT	Galectin-2 OS=Rattus norvegicus OX=10116 GN=Lgals2 PE=2 SV=1	0.00187262	0.00125486	0.00135246	0.000399099	2.13925e-06	1.17e-06	0.00430723	-3.47675	62	0.114072
sp|P63036|DNJA1_RAT	DnaJ homolog subfamily A member 1 OS=Rattus norvegicus OX=10116 GN=Dnaja1 PE=1 SV=1	0.0004088	0.000342426	0.000369059	0.000196031	7.34458e-05	7.15515e-05	0.00464534	-1.7159	63	0.121074
sp|Q63279|K1C19_RAT	Keratin, type I cytoskeletal 19 OS=Rattus norvegicus OX=10116 GN=Krt19 PE=1 SV=2	0.000201357	6.74656e-05	7.27129e-05	0.000386225	0.000361762	0.000352431	0.0048948	1.68794	64	0.125582
sp|Q6P502|TCPG_RAT	T-complex protein 1 subunit gamma OS=Rattus norvegicus OX=10116 GN=Cct3 PE=1 SV=1	0.00044668	0.000498874	0.00043014	0.000285594	0.000214004	0.000156363	0.00494666	-1.06848	65	0.12496
sp|Q5XIM5|CDV3_RAT	Protein CDV3 homolog OS=Rattus norvegicus OX=10116 GN=Cdv3 PE=1 SV=1	0.0016046	0.00172809	0.00198666	1.44039e-06	0.000741305	0.000481457	0.00502503	-2.11941	66	0.125017
sp|Q4KM49|SYYC_RAT	Tyrosine--tRNA ligase, cytoplasmic OS=Rattus norvegicus OX=10116 GN=Yars1 PE=2 SV=3	0.000461062	0.000514936	0.000388491	0.000147394	2.13925e-06	0.000161397	0.00499546	-2.13369	67	0.122426
sp|Q8K1P7|SMCA4_RAT	Transcription activator BRG1 OS=Rattus norvegicus OX=10116 GN=Smarca4 PE=1 SV=1	3.35387e-05	3.37119e-05	1.8167e-05	1.44039e-06	2.13925e-06	1.17e-06	0.00647168	-4.16864	68	0.156272
sp|P11466|OCTC_RAT	Peroxisomal carnitine O-octanoyltransferase OS=Rattus norvegicus OX=10116 GN=Crot PE=1 SV=3	1.33575e-06	2.151e-06	1.44708e-06	0.000593431	0.00100052	0.000603394	0.00550267	8.79884	69	0.130948
sp|P63326|RS10_RAT	40S ribosomal protein S10 OS=Rattus norvegicus OX=10116 GN=Rps10 PE=2 SV=1	0.00114753	0.0016478	0.00142077	0.000628883	0.000530145	0.000344314	0.00563135	-1.48773	70	0.132095
sp|P07154|CATL1_RAT	Procathepsin L OS=Rattus norvegicus OX=10116 GN=Ctsl PE=1 SV=2	0.000647879	0.000814031	0.000701876	0.0010097	0.00113489	0.00119067	0.00574795	0.624239	71	0.132931
sp|Q5HZV9|PP1R7_RAT	Protein phosphatase 1 regulatory subunit 7 OS=Rattus norvegicus OX=10116 GN=Ppp1r7 PE=1 SV=1	0.000450816	0.000226572	0.00040699	1.44039e-06	2.13925e-06	1.17e-06	0.00632115	-7.83483	72	0.144157
sp|O55171|ACOT2_RAT	Acyl-coenzyme A thioesterase 2, mitochondrial OS=Rattus norvegicus OX=10116 GN=Acot2 PE=1 SV=1	0.000597107	0.00066021	0.000646872	0.000114532	2.13925e-06	0.000313531	0.00616794	-2.14609	73	0.138736
sp|O08587|NUP50_RAT	Nuclear pore complex protein Nup50 OS=Rattus norvegicus OX=10116 GN=Nup50 PE=2 SV=2	0.000115841	0.000232879	0.000188244	1.44039e-06	2.13925e-06	1.17e-06	0.00650679	-6.82086	74	0.14438
sp|P27952|RS2_RAT	40S ribosomal protein S2 OS=Rattus norvegicus OX=10116 GN=Rps2 PE=1 SV=1	0.00138476	0.0015775	0.00130015	0.000796836	0.000696607	0.000969486	0.00632516	-0.791293	75	0.138479
sp|P45953|ACADV_RAT	Very long-chain specific acyl-CoA dehydrogenase, mitochondrial OS=Rattus norvegicus OX=10116 GN=Acadvl PE=1 SV=1	0.000660738	0.000705659	0.000671068	0.000752499	0.000756772	0.000780621	0.00648189	0.168504	76	0.140043
sp|P12368|KAP2_RAT	cAMP-dependent protein kinase type II-alpha regulatory subunit OS=Rattus norvegicus OX=10116 GN=Prkar2a PE=1 SV=4	1.33575e-06	2.151e-06	1.44708e-06	0.000194075	0.000145426	0.000283351	0.00698322	6.98004	77	0.148915
sp|P17988|ST1A1_RAT	Sulfotransferase 1A1 OS=Rattus norvegicus OX=10116 GN=Sult1a1 PE=1 SV=1	0.000464759	0.000280295	0.000503493	0.000980604	0.00120239	0.000878534	0.00684053	1.294	78	0.144002
sp|P49134|ITB1_RAT	Integrin beta-1 OS=Rattus norvegicus OX=10116 GN=Itgb1 PE=2 SV=1	6.7707e-05	3.40283e-05	3.6675e-05	9.74021e-05	0.000109479	0.000106656	0.00690615	1.17968	79	0.143543
sp|Q6URK4|ROA3_RAT	Heterogeneous nuclear ribonucleoprotein A3 OS=Rattus norvegicus OX=10116 GN=Hnrnpa3 PE=1 SV=1	0.00135602	0.00157823	0.00115976	0.000752917	0.000615472	0.000749497	0.00696631	-0.95089	80	0.142984
sp|P02770|ALBU_RAT	Albumin OS=Rattus norvegicus OX=10116 GN=Alb PE=1 SV=2	0.00244686	0.00290668	0.0026026	0.00379735	0.00479572	0.00420483	0.00724256	0.685766	81	0.146818
sp|P49432|ODPB_RAT	Pyruvate dehydrogenase E1 component subunit beta, mitochondrial OS=Rattus norvegicus OX=10116 GN=Pdhb PE=1 SV=2	0.00158225	0.00189336	0.00155087	0.00115616	0.00089342	0.000949502	0.00753613	-0.745026	82	0.150906
sp|P06757|ADH1_RAT	Alcohol dehydrogenase 1 OS=Rattus norvegicus OX=10116 GN=Adh1 PE=1 SV=3	0.00179847	0.00151851	0.00163662	0.00262174	0.00232643	0.00294636	0.00755723	0.672376	83	0.149506
sp|P61980|HNRPK_RAT	Heterogeneous nuclear ribonucleoprotein K OS=Rattus norvegicus OX=10116 GN=Hnrnpk PE=1 SV=1	0.00157737	0.00182041	0.00158225	0.00117661	0.00113357	0.00128839	0.00761666	-0.46873	84	0.148888
sp|P10111|PPIA_RAT	Peptidyl-prolyl cis-trans isomerase A OS=Rattus norvegicus OX=10116 GN=Ppia PE=1 SV=2	0.00511291	0.00497353	0.00482432	0.00379631	0.00337806	0.00415697	0.00764204	-0.396037	85	0.147626
sp|Q9QZR6|SEPT9_RAT	Septin-9 OS=Rattus norvegicus OX=10116 GN=Septin9 PE=1 SV=1	0.000191837	0.000241034	0.000207825	1.44039e-06	0.000103397	5.03651e-05	0.00786176	-2.04549	86	0.150105
sp|P39032|RL36_RAT	60S ribosomal protein L36 OS=Rattus norvegicus OX=10116 GN=Rpl36 PE=1 SV=2	0.000515218	0.000517879	0.000558158	1.44039e-06	2.13925e-06	0.000270533	0.00838043	-2.53733	87	0.158169
sp|Q6NYB7|RAB1A_RAT	Ras-related protein Rab-1A OS=Rattus norvegicus OX=10116 GN=Rab1A PE=1 SV=3	0.000659731	0.000795765	0.000714715	0.00151852	0.00142234	0.00110852	0.00851955	0.899869	88	0.158967
sp|Q9JJ19|NHRF1_RAT	Na(+)/H(+) exchange regulatory cofactor NHE-RF1 OS=Rattus norvegicus OX=10116 GN=Slc9a3r1 PE=1 SV=3	0.00106372	0.00129833	0.00139932	0.00196747	0.00171999	0.00183521	0.00868105	0.554108	89	0.16016
sp|Q6P6R2|DLDH_RAT	Dihydrolipoyl dehydrogenase, mitochondrial OS=Rattus norvegicus OX=10116 GN=Dld PE=1 SV=1	0.00223194	0.00224346	0.0025331	0.00168186	0.00177583	0.00139518	0.00892239	-0.530266	90	0.162784
sp|Q6QLM7|KIF5A_RAT	Kinesin heavy chain isoform 5A OS=Rattus norvegicus OX=10116 GN=Kif5a PE=1 SV=1	1.33575e-06	2.151e-06	1.44708e-06	5.05188e-05	2.83914e-05	2.76591e-05	0.0107071	4.43294	91	0.193198
sp|P11608|ATP8_RAT	ATP synthase protein 8 OS=Rattus norvegicus OX=10116 GN=Mt-atp8 PE=1 SV=2	1.33575e-06	2.151e-06	1.44708e-06	0.000774371	0.000435194	0.000423969	0.00916091	8.37107	92	0.163502
sp|Q62991|SCFD1_RAT	Sec1 family domain-containing protein 1 OS=Rattus norvegicus OX=10116 GN=Scfd1 PE=1 SV=1	1.33575e-06	2.151e-06	1.44708e-06	0.000162897	9.15478e-05	8.91866e-05	0.00953512	6.12201	93	0.168351
sp|Q66HA8|HS105_RAT	Heat shock protein 105 kDa OS=Rattus norvegicus OX=10116 GN=Hsph1 PE=1 SV=1	0.000378307	0.000411949	0.00034153	0.000211643	0.000169918	0.000264857	0.00908118	-0.808061	94	0.158631
sp|Q56A18|SMCE1_RAT	SWI/SNF-related matrix-associated actin-dependent regulator of chromatin subfamily E member 1 OS=Rattus norvegicus OX=10116 GN=Smarce1 PE=1 SV=1	7.19387e-05	0.00014462	0.000155869	1.44039e-06	2.13925e-06	1.17e-06	0.00959516	-6.293	95	0.165845
sp|F2Z3T4|MBNL2_RAT	Muscleblind-like protein 2 OS=Rattus norvegicus OX=10116 GN=Mbnl2 PE=1 SV=1	1.33575e-06	2.151e-06	1.44708e-06	0.000139096	0.000234515	0.000304621	0.00945721	7.10293	96	0.161758
sp|Q5XID1|CPIN1_RAT	Anamorsin OS=Rattus norvegicus OX=10116 GN=Ciapin1 PE=1 SV=1	0.000262611	0.000263967	0.000189665	8.39528e-05	2.13925e-06	9.19286e-05	0.00896146	-2.00841	97	0.151698
sp|Q64240|AMBP_RAT	Protein AMBP OS=Rattus norvegicus OX=10116 GN=Ambp PE=1 SV=1	0.000775042	0.000545331	0.000839636	0.00111496	0.00116966	0.00113949	0.00969027	0.664694	98	0.162362
sp|B2RYW9|FAHD2_RAT	Fumarylacetoacetate hydrolase domain-containing protein 2 OS=Rattus norvegicus OX=10116 GN=Fahd2 PE=1 SV=1	0.000259255	0.000173729	9.36208e-05	0.0012432	0.000838408	0.00072603	0.009796	2.41456	99	0.162475
sp|Q9QVC8|FKBP4_RAT	Peptidyl-prolyl cis-trans isomerase FKBP4 OS=Rattus norvegicus OX=10116 GN=Fkbp4 PE=1 SV=3	0.000885883	0.000890458	0.00063981	0.000283203	0.000190991	0.000434152	0.00994434	-1.4114	100	0.163286
sp|Q4G063|CREL2_RAT	Protein disulfide isomerase Creld2 OS=Rattus norvegicus OX=10116 GN=Creld2 PE=1 SV=1	0.000775042	0.000545331	0.000587745	0.000148661	0.000250642	0.000325569	0.0106448	-1.39635	101	0.173057
sp|Q6AYQ8|FAHD1_RAT	Acylpyruvase FAHD1, mitochondrial OS=Rattus norvegicus OX=10116 GN=Fahd1 PE=1 SV=1	1.33575e-06	2.151e-06	1.44708e-06	0.00058691	0.000527746	0.000257067	0.0109298	8.11907	102	0.175949
sp|Q9Z1N1|F16P2_RAT	Fructose-1,6-bisphosphatase isozyme 2 OS=Rattus norvegicus OX=10116 GN=Fbp2 PE=1 SV=1	1.33575e-06	2.151e-06	1.44708e-06	7.65234e-05	0.000172023	0.000167587	0.0116524	6.3982	103	0.18576
sp|P00176|CP2B1_RAT,sp|P04167|CP2B2_RAT	Cytochrome P450 2B1 OS=Rattus norvegicus OX=10116 GN=Cyp2b1 PE=1 SV=1,Cytochrome P450 2B2 OS=Rattus norvegicus OX=10116 GN=Cyp2b2 PE=1 SV=2	1.33575e-06	2.151e-06	1.44708e-06	5.28339e-05	0.00011877	0.000115706	0.0118711	5.86376	104	0.187426
sp|P62832|RL23_RAT	60S ribosomal protein L23 OS=Rattus norvegicus OX=10116 GN=Rpl23 PE=2 SV=1	0.00173886	0.00116523	0.00125586	0.000555888	0.000624814	0.000608699	0.0116167	-1.21709	105	0.181664
sp|Q62651|ECH1_RAT	Delta(3,5)-Delta(2,4)-dienoyl-CoA isomerase, mitochondrial OS=Rattus norvegicus OX=10116 GN=Ech1 PE=1 SV=2	0.00248156	0.00307639	0.0028676	0.00190396	0.00169419	0.00208484	0.0116589	-0.56812	106	0.180603
sp|Q6AYT9|ACSM5_RAT	Acyl-coenzyme A synthetase ACSM5, mitochondrial OS=Rattus norvegicus OX=10116 GN=Acsm5 PE=2 SV=1	1.33575e-06	2.151e-06	0.000101396	0.000179525	0.000252232	0.000294871	0.0118602	2.79245	107	0.182004
sp|P84109|SRBS1_RAT	Sorbin and SH3 domain-containing protein 1 (Fragments) OS=Rattus norvegicus OX=10116 GN=Sorbs1 PE=1 SV=1	0.00154565	0.00233045	0.00167447	0.000741184	0.000833085	0.000811598	0.0125137	-1.21813	108	0.190255
sp|A0JPM9|EIF3J_RAT	Eukaryotic translation initiation factor 3 subunit J OS=Rattus norvegicus OX=10116 GN=Eif3j PE=1 SV=1	0.000731053	0.000944779	0.000905121	0.00060096	0.000562895	0.000548377	0.0127367	-0.592026	109	0.191868
sp|Q6PDV7|RL10_RAT	60S ribosomal protein L10 OS=Rattus norvegicus OX=10116 GN=Rpl10 PE=1 SV=3	0.000252794	0.00012705	0.000136931	1.44039e-06	2.13925e-06	1.17e-06	0.0133937	-6.76557	110	0.199931
sp|Q63184|E2AK2_RAT	Interferon-induced, double-stranded RNA-activated protein kinase OS=Rattus norvegicus OX=10116 GN=Eif2ak2 PE=1 SV=1	0.000105454	5.29993e-05	5.71214e-05	1.44039e-06	2.13925e-06	0	0.0137695	-5.91223	111	0.203689
sp|P62282|RS11_RAT	40S ribosomal protein S11 OS=Rattus norvegicus OX=10116 GN=Rps11 PE=1 SV=3	0.000684784	0.00034416	0.000370928	1.44039e-06	2.13925e-06	0	0.0130938	-8.61126	112	0.191965
sp|P21818|STMN2_RAT	Stathmin-2 OS=Rattus norvegicus OX=10116 GN=Stmn2 PE=1 SV=2	0.000302223	0.000151892	0.000163706	1.44039e-06	2.13925e-06	0	0.013242	-7.43123	113	0.192419
sp|P63039|CH60_RAT	60 kDa heat shock protein, mitochondrial OS=Rattus norvegicus OX=10116 GN=Hspd1 PE=1 SV=1	0.008025	0.00873073	0.00741532	0.00588549	0.00381649	0.00525485	0.0130314	-0.692476	114	0.187697
sp|P62634|CNBP_RAT	Cellular nucleic acid-binding protein OS=Rattus norvegicus OX=10116 GN=Cnbp PE=2 SV=1	0.00137537	0.00168969	0.00182111	0.000439685	0.000988406	0.000802428	0.01319	-1.13132	115	0.18833
sp|A1L1L2|TM214_RAT	Transmembrane protein 214 OS=Rattus norvegicus OX=10116 GN=Tmem214 PE=2 SV=1	1.33575e-06	2.151e-06	1.44708e-06	0.000189353	8.51328e-05	0.000207343	0.0139987	6.60967	116	0.198154
sp|P0C2C4|RM10_RAT	39S ribosomal protein L10, mitochondrial OS=Rattus norvegicus OX=10116 GN=Mrpl10 PE=1 SV=1	0.000102848	0.000206758	0.000111419	1.44039e-06	2.13925e-06	1.17e-06	0.0140681	-6.46994	117	0.197435
sp|P15337|CREB1_RAT	Cyclic AMP-responsive element-binding protein 1 OS=Rattus norvegicus OX=10116 GN=Creb1 PE=1 SV=2	8.27185e-05	0.000166291	8.96125e-05	1.44039e-06	2.13925e-06	1.17e-06	0.0142015	-6.15572	118	0.197617
sp|Q62908|CSRP2_RAT	Cysteine and glycine-rich protein 2 OS=Rattus norvegicus OX=10116 GN=Csrp2 PE=1 SV=3	0.00014015	0.000281748	0.000151831	1.44039e-06	2.13925e-06	1.17e-06	0.0139242	-6.91641	119	0.192131
sp|Q9Z0U5|AOXA_RAT	Aldehyde oxidase 1 OS=Rattus norvegicus OX=10116 GN=Aox1 PE=1 SV=1	8.11672e-05	2.151e-06	8.79319e-05	0.00021407	0.000284361	0.000383576	0.0136506	2.36469	120	0.186786
sp|P02793|FRIL1_RAT,sp|Q7TP54|RIPR2_RAT	Ferritin light chain 1 OS=Rattus norvegicus OX=10116 GN=Ftl1 PE=1 SV=3,Rho family-interacting cell polarization regulator 2 OS=Rattus norvegicus OX=10116 GN=Ripor2 PE=1 SV=1	1.33575e-06	2.151e-06	0.000160127	0.000992295	0.00207133	0.00124179	0.0139335	4.71778	121	0.189081
sp|Q62902|LMAN1_RAT	Protein ERGIC-53 OS=Rattus norvegicus OX=10116 GN=Lman1 PE=1 SV=1	0.000209276	0.000315535	0.000340077	0.000501768	0.000733179	0.000604382	0.0141309	1.08859	122	0.190188
sp|Q4QQW8|PLBL2_RAT	Putative phospholipase B-like 2 OS=Rattus norvegicus OX=10116 GN=Plbd2 PE=1 SV=2	0.00018495	9.29526e-05	0.000150273	0.00031041	0.000299056	0.000242786	0.0141864	0.993076	123	0.189383
sp|P97697|IMPA1_RAT	Inositol monophosphatase 1 OS=Rattus norvegicus OX=10116 GN=Impa1 PE=1 SV=2	0.000195299	0.000392616	0.000211576	0.000936513	0.00105263	0.000615291	0.0143612	1.70382	124	0.190169
sp|P07632|SODC_RAT	Superoxide dismutase [Cu-Zn] OS=Rattus norvegicus OX=10116 GN=Sod1 PE=1 SV=2	0.00720135	0.00723853	0.00761125	0.0160028	0.012875	0.0110672	0.014608	0.857163	125	0.191891
sp|P01835|KACB_RAT	Ig kappa chain C region, B allele OS=Rattus norvegicus OX=10116 PE=1 SV=1	0.00153107	0.00179548	0.00165868	0.0024473	0.00275075	0.00214384	0.0147261	0.558494	126	0.191906
sp|P09414|NFIA_RAT	Nuclear factor 1 A-type OS=Rattus norvegicus OX=10116 GN=Nfia PE=1 SV=2	0.000106283	0.000106832	0.000115141	5.09655e-05	2.13925e-06	5.58073e-05	0.0136141	-1.59165	127	0.176018
sp|Q63362|NDUA5_RAT	NADH dehydrogenase [ubiquinone] 1 alpha subcomplex subunit 5 OS=Rattus norvegicus OX=10116 GN=Ndufa5 PE=1 SV=3	0.0011659	0.00117192	0.000757844	1.44039e-06	2.13925e-06	0.000489757	0.0151168	-2.64961	128	0.19392
sp|Q63010|EST5_RAT	Liver carboxylesterase B-1 OS=Rattus norvegicus OX=10116 PE=1 SV=1	0.000385725	0.000387717	0.000470106	0.000231207	5.1975e-05	0.000202538	0.0152919	-1.35627	129	0.194646
sp|P17764|THIL_RAT	Acetyl-CoA acetyltransferase, mitochondrial OS=Rattus norvegicus OX=10116 GN=Acat1 PE=1 SV=1	0.00255179	0.00256497	0.00262624	0.00183548	0.00130661	0.00200985	0.0153349	-0.587776	130	0.193692
sp|P28480|TCPA_RAT	T-complex protein 1 subunit alpha OS=Rattus norvegicus OX=10116 GN=Tcp1 PE=1 SV=1	0.000194597	0.000244502	0.000210815	0.000139972	5.24424e-05	0.00010218	0.0155723	-1.14152	131	0.195189
sp|Q9Z1W6|LYRIC_RAT	Protein LYRIC OS=Rattus norvegicus OX=10116 GN=Mtdh PE=1 SV=2	0.00107079	0.0013103	0.00136177	0.000133949	0.000752788	0.000440023	0.0157441	-1.49623	132	0.195847
sp|P83871|PHF5A_RAT	PHD finger-like domain-containing protein 5A OS=Rattus norvegicus OX=10116 GN=Phf5a PE=2 SV=1	0.000491799	0.000494339	0.000799181	0.000235831	2.13925e-06	1.17e-06	0.0159744	-2.90025	133	0.197218
sp|Q6AYZ1|TBA1C_RAT	Tubulin alpha-1C chain OS=Rattus norvegicus OX=10116 GN=Tuba1c PE=1 SV=1	0.00090364	0.000605538	0.000848425	0.00115552	0.00116892	0.00113877	0.0160393	0.554787	134	0.196542
sp|Q5I0M2|NADC_RAT	Nicotinate-nucleotide pyrophosphorylase [carboxylating] OS=Rattus norvegicus OX=10116 GN=Qprt PE=2 SV=1	0.000723718	0.000545591	0.000490022	0.000173521	2.13925e-06	0.000285009	0.0161852	-1.93322	135	0.19686
sp|O70257|STX7_RAT	Syntaxin-7 OS=Rattus norvegicus OX=10116 GN=Stx7 PE=1 SV=4	1.33575e-06	0.000416684	0.000224546	0.000695747	0.000670298	0.00087068	0.0172382	1.79947	136	0.208126
sp|Q9ER34|ACON_RAT	Aconitate hydratase, mitochondrial OS=Rattus norvegicus OX=10116 GN=Aco2 PE=1 SV=2	0.00162987	0.00139429	0.00135246	0.00106426	0.0010467	0.00116537	0.0174748	-0.417736	137	0.209442
sp|P17077|RL9_RAT	60S ribosomal protein L9 OS=Rattus norvegicus OX=10116 GN=Rpl9 PE=1 SV=1	0.00056352	0.000424823	0.000457864	0.000270223	0.000151864	1.17e-06	0.0181761	-1.77267	138	0.216269
sp|P62963|PROF1_RAT	Profilin-1 OS=Rattus norvegicus OX=10116 GN=Pfn1 PE=1 SV=2	0.00154565	0.00155364	0.00188378	0.00111178	0.00104136	0.000608699	0.0184334	-0.851412	139	0.217753
sp|Q9JJ40|NHRF3_RAT	Na(+)/H(+) exchange regulatory cofactor NHE-RF3 OS=Rattus norvegicus OX=10116 GN=Pdzk1 PE=1 SV=2	0.00129297	0.000987733	0.000840439	0.000595214	0.000334508	0.000434508	0.0188062	-1.19399	140	0.22057
sp|P04182|OAT_RAT	Ornithine aminotransferase, mitochondrial OS=Rattus norvegicus OX=10116 GN=Oat PE=1 SV=1	0.000308075	0.000371599	0.0001335	1.44039e-06	2.13925e-06	1.17e-06	0.0193403	-7.4196	141	0.225225
sp|Q5PPL3|NSDHL_RAT	Sterol-4-alpha-carboxylate 3-dehydrogenase, decarboxylating OS=Rattus norvegicus OX=10116 GN=Nsdhl PE=2 SV=1	0.000523046	0.000675961	0.000809484	0.000143323	0.000161094	0.000392347	0.0192021	-1.52737	142	0.222041
sp|Q4KLP0|DHTK1_RAT	Probable 2-oxoglutarate dehydrogenase E1 component DHKTD1, mitochondrial OS=Rattus norvegicus OX=10116 GN=Dhtkd1 PE=2 SV=1	0.000147005	0.000118211	0.000159257	5.63944e-05	3.16935e-05	9.2628e-05	0.0193711	-1.23195	143	0.222429
sp|Q60587|ECHB_RAT	Trifunctional enzyme subunit beta, mitochondrial OS=Rattus norvegicus OX=10116 GN=Hadhb PE=1 SV=1	0.00165141	0.00143098	0.00160397	0.00092843	0.000552467	0.00113624	0.0197944	-0.84048	144	0.225711
sp|Q0D2L3|SPEB_RAT	Agmatinase, mitochondrial OS=Rattus norvegicus OX=10116 GN=Agmat PE=2 SV=1	0.000613008	0.000693195	0.000913134	0.00102884	0.00115641	0.00120705	0.0199145	0.612134	145	0.225514
sp|Q6IRK9|CBPQ_RAT	Carboxypeptidase Q OS=Rattus norvegicus OX=10116 GN=Cpq PE=1 SV=1	0.000859607	0.000921649	0.000993332	0.00192362	0.00154438	0.00132401	0.0199445	0.788358	146	0.224308
sp|Q62920|PDLI5_RAT	PDZ and LIM domain protein 5 OS=Rattus norvegicus OX=10116 GN=Pdlim5 PE=1 SV=2	0.000366145	0.000368036	0.000446243	0.000175576	0.000246683	0.000288385	0.0206425	-0.732104	147	0.230578
sp|Q80X08|WASC2_RAT	WASH complex subunit 2 OS=Rattus norvegicus OX=10116 GN=Washc2 PE=1 SV=1	0.000549941	0.000532308	0.000728169	0.000312547	0.000373257	0.00038502	0.0206677	-0.757601	148	0.2293
sp|P14141|CAH3_RAT	Carbonic anhydrase 3 OS=Rattus norvegicus OX=10116 GN=Ca3 PE=1 SV=3	0.003017	0.00271886	0.0021414	0.00179594	0.00157005	0.0014203	0.0210248	-0.718787	149	0.231696
sp|P86182|CCD22_RAT	Coiled-coil domain-containing protein 22 OS=Rattus norvegicus OX=10116 GN=Ccdc22 PE=1 SV=2	0.000129421	0.000130089	4.67357e-05	1.44039e-06	2.13925e-06	1.17e-06	0.0221333	-6.01073	150	0.242286
sp|Q07523|HAOX2_RAT	Hydroxyacid oxidase 2 OS=Rattus norvegicus OX=10116 GN=Hao2 PE=1 SV=2	0.000229878	0.000231065	8.30122e-05	1.44039e-06	2.13925e-06	1.17e-06	0.0216472	-6.83953	151	0.235395
sp|O35889|AFAD_RAT	Afadin OS=Rattus norvegicus OX=10116 GN=Afdn PE=1 SV=1	0.000325357	0.000297306	0.000304408	0.000212751	0.000271015	0.000232963	0.0211677	-0.371253	152	0.228666
sp|O55012|PICAL_RAT	Phosphatidylinositol-binding clathrin assembly protein OS=Rattus norvegicus OX=10116 GN=Picalm PE=1 SV=1	0.000253584	0.000297376	0.000412078	0.000162134	0.000136678	0.000133153	0.0212387	-1.15668	153	0.227934
sp|Q2LC84|NUMB_RAT	Protein numb homolog OS=Rattus norvegicus OX=10116 GN=Numb PE=1 SV=2	0.000124458	8.34007e-05	4.49437e-05	1.44039e-06	2.13925e-06	1.17e-06	0.0227325	-5.73405	154	0.242382
sp|Q6AYK8|EIF3D_RAT	Eukaryotic translation initiation factor 3 subunit D OS=Rattus norvegicus OX=10116 GN=Eif3d PE=1 SV=1	1.33575e-06	2.151e-06	1.44708e-06	0.00028403	0.000106416	0.000311014	0.0224022	7.15151	155	0.237319
sp|P51635|AK1A1_RAT	Aldo-keto reductase family 1 member A1 OS=Rattus norvegicus OX=10116 GN=Akr1a1 PE=1 SV=2	0.00108196	0.000920231	0.00117213	0.000798198	0.000538301	0.000699223	0.0229253	-0.640908	156	0.241303
sp|A0JPJ7|OLA1_RAT	Obg-like ATPase 1 OS=Rattus norvegicus OX=10116 GN=Ola1 PE=2 SV=1	6.83055e-05	6.86582e-05	0.000147996	1.44039e-06	2.13925e-06	1.17e-06	0.0243669	-5.9068	157	0.254844
sp|Q6AYT0|QOR_RAT	Quinone oxidoreductase OS=Rattus norvegicus OX=10116 GN=Cryz PE=2 SV=1	1.33575e-06	2.151e-06	1.44708e-06	0.000157699	0.000265878	0.000431701	0.023642	7.43754	158	0.245697
sp|Q8R424|STABP_RAT	STAM-binding protein OS=Rattus norvegicus OX=10116 GN=Stambp PE=2 SV=1	1.33575e-06	0.000128248	1.44708e-06	0.000183548	0.000206306	0.000200985	0.023216	2.17286	159	0.239752
sp|Q71UE8|NEDD8_RAT	NEDD8 OS=Rattus norvegicus OX=10116 GN=Nedd8 PE=1 SV=1	1.33575e-06	0.000671324	1.44708e-06	0.000960793	0.00107993	0.00105207	0.0234938	2.19786	160	0.241106
sp|P30904|MIF_RAT	Macrophage migration inhibitory factor OS=Rattus norvegicus OX=10116 GN=Mif PE=1 SV=4	0.000470417	0.000236423	1.44708e-06	0.000676733	0.000760643	0.000741024	0.0236299	1.62086	161	0.240996
sp|Q5XIF6|TBA4A_RAT	Tubulin alpha-4A chain OS=Rattus norvegicus OX=10116 GN=Tuba4a PE=1 SV=1	0.000724526	0.000667578	0.000719501	0.00104229	0.000846102	0.000887685	0.0238072	0.394708	162	0.241306
sp|F1MA98|TPR_RAT	Nucleoprotein TPR OS=Rattus norvegicus OX=10116 GN=Tpr PE=1 SV=1	0.000366766	0.000311056	0.000322833	0.000241827	0.000210036	0.000276837	0.024232	-0.457547	163	0.244104
sp|Q4V8F9|HSDL2_RAT	Hydroxysteroid dehydrogenase-like protein 2 OS=Rattus norvegicus OX=10116 GN=Hsdl2 PE=2 SV=1	0.000258101	0.000415094	0.000447379	0.000198026	5.5645e-05	0.00010842	0.0243416	-1.62981	164	0.243713
sp|Q4KLL0|TCEA1_RAT	Transcription elongation factor A protein 1 OS=Rattus norvegicus OX=10116 GN=Tcea1 PE=1 SV=1	0.00116823	0.00135492	0.0014603	0.000689473	0.000871833	0.00103809	0.0250156	-0.615838	165	0.248943
sp|Q6P7Q4|LGUL_RAT	Lactoylglutathione lyase OS=Rattus norvegicus OX=10116 GN=Glo1 PE=1 SV=3	0.00132305	0.00162541	0.00207034	0.00366564	0.00316935	0.00247008	0.0250665	0.890674	166	0.247947
sp|Q6UPE1|ETFD_RAT	Electron transfer flavoprotein-ubiquinone oxidoreductase, mitochondrial OS=Rattus norvegicus OX=10116 GN=Etfdh PE=1 SV=1	0.000834302	0.000926885	0.000713554	0.00109493	0.00104136	0.00124507	0.0253013	0.450322	167	0.248771
sp|Q9QUH3|APOA5_RAT	Apolipoprotein A-V OS=Rattus norvegicus OX=10116 GN=Apoa5 PE=1 SV=1	0.000147406	7.40835e-05	1.44708e-06	0.000212055	0.000238349	0.000309601	0.0250194	1.76938	168	0.244535
sp|Q68FU3|ETFB_RAT	Electron transfer flavoprotein subunit beta OS=Rattus norvegicus OX=10116 GN=Etfb PE=1 SV=3	0.0045612	0.004798	0.00471151	0.00366232	0.00308732	0.00412165	0.0255203	-0.372173	169	0.247955
sp|P04762|CATA_RAT	Catalase OS=Rattus norvegicus OX=10116 GN=Cat PE=1 SV=3	0.00323356	0.0029923	0.0027246	0.00236279	0.0025451	0.00242555	0.0261501	-0.28747	170	0.25258
sp|Q68FS4|AMPL_RAT	Cytosol aminopeptidase OS=Rattus norvegicus OX=10116 GN=Lap3 PE=1 SV=1	0.00151141	0.00130966	0.00141153	0.00184939	0.00202252	0.00164196	0.0265056	0.381521	171	0.254515
sp|P70583|DUT_RAT	Deoxyuridine 5'-triphosphate nucleotidohydrolase OS=Rattus norvegicus OX=10116 GN=Dut PE=2 SV=3	0.000395838	0.000132628	0.000428829	1.44039e-06	2.13925e-06	1.17e-06	0.027584	-7.655	172	0.263331
sp|D3ZKF5|HTRA4_RAT	Serine protease HTR4 OS=Rattus norvegicus OX=10116 GN=Htra4 PE=3 SV=1	1.33575e-06	2.151e-06	1.44708e-06	0.000106317	5.975e-05	0.000174627	0.0284398	6.10962	173	0.269931
sp|P10536|RAB1B_RAT	Ras-related protein Rab-1B OS=Rattus norvegicus OX=10116 GN=Rab1b PE=1 SV=1	0.000269144	0.000676334	0.00058315	0.00141968	0.00101545	0.000989261	0.0273218	1.16361	174	0.25783
sp|Q66HF1|NDUS1_RAT	NADH-ubiquinone oxidoreductase 75 kDa subunit, mitochondrial OS=Rattus norvegicus OX=10116 GN=Ndufs1 PE=1 SV=1	0.00115339	0.00123415	0.00104799	0.000927754	0.000962574	0.00097682	0.0274448	-0.260915	175	0.257511
sp|Q498T2|CHTOP_RAT	Chromatin target of PRMT1 protein OS=Rattus norvegicus OX=10116 GN=Chtop PE=2 SV=1	0.000109068	0.000328895	0.000354475	1.44039e-06	2.13925e-06	1.17e-06	0.0280195	-7.38234	176	0.261409
sp|Q6MG08|ABCF1_RAT	ATP-binding cassette sub-family F member 1 OS=Rattus norvegicus OX=10116 GN=Abcf1 PE=1 SV=1	0.000322395	0.00032406	0.000419118	3.09195e-05	0.00010426	0.000236998	0.0276259	-1.51757	177	0.256281
sp|Q64573|EST1F_RAT	Liver carboxylesterase 1F OS=Rattus norvegicus OX=10116 GN=Ces1f PE=1 SV=2	0.000144647	0.000145394	5.22341e-05	0.000416173	0.00051975	0.000253172	0.0277998	1.79664	178	0.256445
sp|P09875|UD2B1_RAT	UDP-glucuronosyltransferase 2B1 OS=Rattus norvegicus OX=10116 GN=Ugt2b1 PE=1 SV=1	5.11323e-05	5.13963e-05	5.53938e-05	9.80772e-05	0.000165357	0.000107395	0.0281784	1.23154	179	0.258486
sp|P08461|ODP2_RAT	Dihydrolipoyllysine-residue acetyltransferase component of pyruvate dehydrogenase complex, mitochondrial OS=Rattus norvegicus OX=10116 GN=Dlat PE=1 SV=3	0.000641985	0.00055926	0.000510026	0.000451512	0.000322952	0.000269677	0.0284538	-0.712751	180	0.259562
sp|P11348|DHPR_RAT	Dihydropteridine reductase OS=Rattus norvegicus OX=10116 GN=Qdpr PE=1 SV=1	0.000897891	0.00112816	0.00145909	0.00161461	0.00181481	0.00188587	0.0285141	0.608935	181	0.258675
sp|F1LR10|LIMA1_RAT	LIM domain and actin-binding protein 1 OS=Rattus norvegicus OX=10116 GN=Lima1 PE=1 SV=2	0.000895661	0.000900286	0.00104793	0.000618471	0.000540678	0.000790099	0.028597	-0.544943	182	0.258001
sp|P18886|CPT2_RAT	Carnitine O-palmitoyltransferase 2, mitochondrial OS=Rattus norvegicus OX=10116 GN=Cpt2 PE=1 SV=1	0.000411078	0.000330561	0.000445339	1.44039e-06	2.13925e-06	0.000259021	0.0288284	-2.17635	183	0.258668
sp|P04906|GSTP1_RAT	Glutathione S-transferase P OS=Rattus norvegicus OX=10116 GN=Gstp1 PE=1 SV=2	0.000644023	0.000517879	0.000558158	0.00247061	0.00124963	0.0016232	0.0292097	1.63531	184	0.260665
sp|Q9WTT6|GUAD_RAT	Guanine deaminase OS=Rattus norvegicus OX=10116 GN=Gda PE=1 SV=1	0.000417054	0.000538982	0.000451813	1.44039e-06	2.13925e-06	0.000312841	0.0295966	-2.15358	185	0.26269
sp|P02764|A1AG_RAT	Alpha-1-acid glycoprotein OS=Rattus norvegicus OX=10116 GN=Orm1 PE=2 SV=1	1.33575e-06	2.151e-06	1.44708e-06	0.000126544	0.000284468	0.000415697	0.030587	7.38853	186	0.270021
sp|P19945|RLA0_RAT	60S acidic ribosomal protein P0 OS=Rattus norvegicus OX=10116 GN=Rplp0 PE=1 SV=2	0.000341312	0.000343074	0.000462197	0.000245502	9.1981e-05	1.17e-06	0.0301033	-1.75946	187	0.264329
sp|Q63644|ROCK1_RAT	Rho-associated protein kinase 1 OS=Rattus norvegicus OX=10116 GN=Rock1 PE=1 SV=1	1.33575e-06	2.151e-06	1.44708e-06	7.57967e-05	0.000127792	4.14988e-05	0.0331827	5.63445	188	0.289819
sp|Q62812|MYH9_RAT	Myosin-9 OS=Rattus norvegicus OX=10116 GN=Myh9 PE=1 SV=3	0.00153107	0.00142806	0.00153913	0.00169327	0.00166532	0.0015934	0.0313286	0.138638	189	0.272178
sp|P50554|GABT_RAT	4-aminobutyrate aminotransferase, mitochondrial OS=Rattus norvegicus OX=10116 GN=Abat PE=1 SV=3	0.000108196	0.000163132	0.00017582	0.000415063	0.000233264	0.000397683	0.0315399	1.22607	190	0.272571
sp|D3ZCL3|RU1C_RAT	U1 small nuclear ribonucleoprotein C OS=Rattus norvegicus OX=10116 GN=Snrpc PE=3 SV=1	1.33575e-06	2.151e-06	0.000368595	0.000489461	0.000550151	0.000535961	0.031544	2.08218	191	0.271179
sp|P08009|GSTM7_RAT	Glutathione S-transferase Mu 7 OS=Rattus norvegicus OX=10116 GN=Gstm7 PE=1 SV=2	0.000372233	0.000124719	0.000268838	0.000832981	0.00107002	0.00052121	0.0338492	1.66249	192	0.289481
sp|Q8K5B3|MCFD2_RAT	Multiple coagulation factor deficiency protein 2 homolog OS=Rattus norvegicus OX=10116 GN=Mcfd2 PE=1 SV=1	0.00149236	0.00150006	0.00181883	0.0028625	0.00341852	0.00215493	0.0338539	0.810141	193	0.288021
sp|Q3KRE0|ATAD3_RAT	ATPase family AAA domain-containing protein 3 OS=Rattus norvegicus OX=10116 GN=Atad3 PE=1 SV=1	0.000320377	0.00041404	0.000446243	0.000570624	0.000493367	0.000624834	0.034307	0.516426	194	0.290372
sp|P31399|ATP5H_RAT	ATP synthase subunit d, mitochondrial OS=Rattus norvegicus OX=10116 GN=Atp5pd PE=1 SV=3	0.0055442	0.00591057	0.00637028	0.00725071	0.00724422	0.00652807	0.0345584	0.238062	195	0.290999
sp|Q8R491|EHD3_RAT	EH domain-containing protein 3 OS=Rattus norvegicus OX=10116 GN=Ehd3 PE=1 SV=2	0.000556147	0.000508199	0.000547725	0.000630352	0.000872014	0.000796428	0.0348292	0.511962	196	0.291783
sp|P05197|EF2_RAT	Elongation factor 2 OS=Rattus norvegicus OX=10116 GN=Eef2 PE=1 SV=4	0.00119797	0.00101403	0.0011612	0.000907043	0.000781624	0.000960107	0.0352418	-0.348795	197	0.293741
sp|P01041|CYTB_RAT	Cystatin-B OS=Rattus norvegicus OX=10116 GN=Cstb PE=1 SV=1	0.000828029	0.00110974	0.00119605	0.000529417	2.13925e-06	0.000579713	0.0352673	-1.49572	198	0.292469
sp|P00507|AATM_RAT	Aspartate aminotransferase, mitochondrial OS=Rattus norvegicus OX=10116 GN=Got2 PE=1 SV=2	0.00176133	0.00132782	0.00149924	0.00120658	0.000678093	0.000792724	0.0354849	-0.777157	199	0.292795
sp|Q03336|RGN_RAT	Regucalcin OS=Rattus norvegicus OX=10116 GN=Rgn PE=1 SV=3	0.00135697	0.00127305	0.000980044	0.00416451	0.0037057	0.00199507	0.0357878	1.45034	200	0.293818
sp|P30427|PLEC_RAT	Plectin OS=Rattus norvegicus OX=10116 GN=Plec PE=1 SV=2	0.000478998	0.000371255	0.000418887	0.000575615	0.000528788	0.000509089	0.0358227	0.346335	201	0.292641
sp|Q03346|MPPB_RAT	Mitochondrial-processing peptidase subunit beta OS=Rattus norvegicus OX=10116 GN=Pmpcb PE=1 SV=3	0.00011063	0.000111201	5.9925e-05	5.30499e-05	2.13925e-06	1.17e-06	0.0357677	-2.32172	202	0.290745
sp|P00697|LYSC1_RAT	Lysozyme C-1 OS=Rattus norvegicus OX=10116 GN=Lyz1 PE=1 SV=2	0.000913816	0.000734828	0.000989976	0.00035056	2.13925e-06	0.000575796	0.0358195	-1.50682	203	0.289732
sp|Q5XIE6|HIBCH_RAT	3-hydroxyisobutyryl-CoA hydrolase, mitochondrial OS=Rattus norvegicus OX=10116 GN=Hibch PE=1 SV=2	0.000772827	0.000423719	0.00091335	0.000336902	0.00015147	0.000147563	0.0361566	-1.73022	204	0.291025
sp|G3V928|LRP1_RAT	Prolow-density lipoprotein receptor-related protein 1 OS=Rattus norvegicus OX=10116 GN=Lrp1 PE=1 SV=1	7.73678e-05	4.78568e-05	3.22369e-05	0.000142692	8.98156e-05	0.000112499	0.0366206	1.13162	205	0.293322
sp|P04905|GSTM1_RAT	Glutathione S-transferase Mu 1 OS=Rattus norvegicus OX=10116 GN=Gstm1 PE=1 SV=2	0.00136486	0.000997748	0.00120977	0.000713984	0.000936265	0.000781815	0.03845	-0.554702	206	0.30648
sp|P10959|EST1C_RAT	Carboxylesterase 1C OS=Rattus norvegicus OX=10116 GN=Ces1c PE=1 SV=3	1.33575e-06	2.151e-06	0.000160127	0.000283513	0.000424889	0.000206965	0.0389675	2.48405	207	0.309105
sp|P24473|GSTK1_RAT	Glutathione S-transferase kappa 1 OS=Rattus norvegicus OX=10116 GN=Gstk1 PE=1 SV=3	0.000359057	0.000120304	0.000129661	0.00068871	0.000387053	0.00062845	0.0390726	1.48454	208	0.308448
sp|Q64591|DECR_RAT	2,4-dienoyl-CoA reductase [(3E)-enoyl-CoA-producing], mitochondrial OS=Rattus norvegicus OX=10116 GN=Decr1 PE=1 SV=2	0.000968918	0.000892761	0.000612308	0.000387185	0.000522233	0.000508763	0.0392532	-0.802796	209	0.308391
sp|Q5XIN6|LETM1_RAT	Mitochondrial proton/calcium exchanger protein OS=Rattus norvegicus OX=10116 GN=Letm1 PE=1 SV=1	0.00051243	0.000478285	0.000634442	0.00122862	0.00153878	0.000807205	0.0402859	1.13721	210	0.314997
sp|Q9R064|GORS2_RAT	Golgi reassembly-stacking protein 2 OS=Rattus norvegicus OX=10116 GN=Gorasp2 PE=1 SV=3	0.000417054	0.000359321	0.000258179	0.000228559	0.000128449	0.000187704	0.0407025	-0.925443	211	0.316746
sp|Q4FZX5|MSRB2_RAT	Methionine-R-sulfoxide reductase B2, mitochondrial OS=Rattus norvegicus OX=10116 GN=Msrb2 PE=2 SV=1	0.000932723	0.000781283	0.00117887	0.000596355	0.000670298	0.000489757	0.0407689	-0.719874	212	0.315767
sp|Q5XIH7|PHB2_RAT	Prohibitin-2 OS=Rattus norvegicus OX=10116 GN=Phb2 PE=1 SV=1	0.000995112	0.000636523	0.000784035	0.000260282	0.000195037	0.000570019	0.0407883	-1.23633	213	0.314434
sp|Q9WVA1|TIM8A_RAT	Mitochondrial import inner membrane translocase subunit Tim8 A OS=Rattus norvegicus OX=10116 GN=Timm8a PE=1 SV=1	0.00111542	0.00168177	0.00120838	0.0021395	0.00240478	0.00175707	0.0408725	0.653651	214	0.313611
sp|Q4FZT0|STML2_RAT	Stomatin-like protein 2, mitochondrial OS=Rattus norvegicus OX=10116 GN=Stoml2 PE=1 SV=1	0.00076626	0.000616173	0.000581085	0.000514419	0.000330402	0.00024141	0.0410959	-0.854109	215	0.313858
sp|P35286|RAB13_RAT	Ras-related protein Rab-13 OS=Rattus norvegicus OX=10116 GN=Rab13 PE=1 SV=2	1.33575e-06	0.000133934	1.44708e-06	0.000255581	0.000143635	0.000279861	0.0412524	2.31238	216	0.313595
sp|Q99PF5|FUBP2_RAT	Far upstream element-binding protein 2 OS=Rattus norvegicus OX=10116 GN=Khsrp PE=1 SV=1	0.000975413	0.00124442	0.00113799	0.000755575	0.000808821	0.000945551	0.0429125	-0.419869	217	0.324711
sp|Q4QQU6|SPF30_RAT	Survival of motor neuron-related-splicing factor 30 OS=Rattus norvegicus OX=10116 GN=Smndc1 PE=2 SV=1	0.000340953	0.000342714	0.000615616	1.44039e-06	2.13925e-06	0.000238705	0.0432698	-2.42294	218	0.325913
sp|Q63570|PRS6B_RAT	26S proteasome regulatory subunit 6B OS=Rattus norvegicus OX=10116 GN=Psmc4 PE=1 SV=1	0.000452973	0.000585401	0.000560829	0.000434426	0.00034878	0.000271827	0.0432519	-0.600066	219	0.32429
sp|P85108|TBB2A_RAT	Tubulin beta-2A chain OS=Rattus norvegicus OX=10116 GN=Tubb2a PE=1 SV=1	0.00194509	0.00189404	0.00164625	0.00204034	0.00216228	0.00217034	0.0433668	0.216369	220	0.323674
sp|Q66HG9|MAVS_RAT	Mitochondrial antiviral-signaling protein OS=Rattus norvegicus OX=10116 GN=Mavs PE=1 SV=1	0.000640212	0.000750771	0.000924759	0.000255833	0.000517597	0.000504247	0.0435202	-0.857951	221	0.323349
sp|Q66H98|CAVN2_RAT	Caveolae-associated protein 2 OS=Rattus norvegicus OX=10116 GN=Cavin2 PE=1 SV=3	6.48656e-05	0.000130401	0.000140543	6.22096e-05	2.13925e-06	1.17e-06	0.0444364	-2.35766	222	0.328669
sp|Q9Z0V6|PRDX3_RAT	Thioredoxin-dependent peroxide reductase, mitochondrial OS=Rattus norvegicus OX=10116 GN=Prdx3 PE=1 SV=2	0.000315747	0.000211585	0.000114021	0.000403758	0.000794186	0.000552645	0.0444252	1.44865	223	0.327113
sp|P62997|TRA2B_RAT	Transformer-2 protein homolog beta OS=Rattus norvegicus OX=10116 GN=Tra2b PE=1 SV=1	0.00037568	0.00113286	0.000508738	1.44039e-06	2.13925e-06	1.17e-06	0.0452755	-8.73038	224	0.331886
sp|O08557|DDAH1_RAT	N(G),N(G)-dimethylarginine dimethylaminohydrolase 1 OS=Rattus norvegicus OX=10116 GN=Ddah1 PE=1 SV=3	0.00199308	0.00171718	0.00154228	0.00127432	0.000920778	0.00139538	0.0458682	-0.548841	225	0.334736
sp|P62494|RB11A_RAT	Ras-related protein Rab-11A OS=Rattus norvegicus OX=10116 GN=Rab11a PE=1 SV=3	0.000500907	0.00100699	0.0014923	0.000120099	0.000134991	0.000263018	0.0461572	-2.53373	226	0.335354
sp|P61459|PHS_RAT	Pterin-4-alpha-carbinolamine dehydratase OS=Rattus norvegicus OX=10116 GN=Pcbd1 PE=1 SV=2	0.00442146	0.00313715	0.00394468	0.00548761	0.0072895	0.00518955	0.0463183	0.643275	227	0.335042
sp|P36201|CRIP2_RAT	Cysteine-rich protein 2 OS=Rattus norvegicus OX=10116 GN=Crip2 PE=2 SV=1	0.000650215	0.000915002	0.00126793	0.000249437	0.00056073	0.000273134	0.0466152	-1.38697	228	0.335711
sp|P54319|PLAP_RAT	Phospholipase A-2-activating protein OS=Rattus norvegicus OX=10116 GN=Plaa PE=1 SV=3	6.80477e-05	0.000102599	1.44708e-06	0.000130523	0.00033009	0.000285846	0.0468411	2.11687	229	0.335865
sp|O35567|PUR9_RAT	Bifunctional purine biosynthesis protein ATIC OS=Rattus norvegicus OX=10116 GN=Atic PE=1 SV=2	0.000182763	9.18535e-05	0.000148496	8.76399e-05	2.13925e-06	0	0.0470902	-2.23659	230	0.336183
sp|P19112|F16P1_RAT	Fructose-1,6-bisphosphatase 1 OS=Rattus norvegicus OX=10116 GN=Fbp1 PE=1 SV=2	0.00126676	0.0013482	0.00121088	0.00200099	0.00144585	0.00179983	0.0471331	0.455627	231	0.335033
sp|P49791|NU153_RAT	Nuclear pore complex protein Nup153 OS=Rattus norvegicus OX=10116 GN=Nup153 PE=1 SV=1	5.52772e-05	0.000129646	0.000179652	1.44039e-06	2.13925e-06	3.87002e-05	0.0480956	-3.10818	232	0.340401
sp|Q66HF8|AL1B1_RAT	Aldehyde dehydrogenase X, mitochondrial OS=Rattus norvegicus OX=10116 GN=Aldh1b1 PE=1 SV=1	0.000364822	0.000366706	0.000169383	1.44039e-06	0.000168543	1.17e-06	0.0473884	-2.39609	233	0.333956
sp|P13697|MAOX_RAT	NADP-dependent malic enzyme OS=Rattus norvegicus OX=10116 GN=Me1 PE=1 SV=2	0.000425596	0.000237663	0.000204918	1.44039e-06	2.13925e-06	0.000148982	0.0476307	-2.50859	234	0.334229
sp|P11240|COX5A_RAT	Cytochrome c oxidase subunit 5A, mitochondrial OS=Rattus norvegicus OX=10116 GN=Cox5a PE=1 SV=1	0.00352007	0.00391069	0.00401415	0.00515275	0.00619108	0.00447491	0.0489553	0.466927	235	0.342062
sp|Q5M9G3|CAPR1_RAT	Caprin-1 OS=Rattus norvegicus OX=10116 GN=Caprin1 PE=1 SV=2	0.000344329	0.000346107	0.00016579	0.000110077	0.000123726	0.000120534	0.0492903	-1.27287	236	0.342944
sp|D3ZTE0|FA12_RAT	Coagulation factor XII OS=Rattus norvegicus OX=10116 GN=F12 PE=2 SV=1	1.33575e-06	2.151e-06	1.44708e-06	8.71981e-05	0.000343035	0.000190964	0.0505864	6.9762	237	0.350476
sp|P52925|HMGB2_RAT	High mobility group protein B2 OS=Rattus norvegicus OX=10116 GN=Hmgb2 PE=2 SV=2	0.000386414	0.000388409	0.000279079	0.000247061	0.000138848	1.17e-06	0.0495328	-1.44504	238	0.341735
sp|P62243|RS8_RAT	40S ribosomal protein S8 OS=Rattus norvegicus OX=10116 GN=Rps8 PE=1 SV=2	0.00169056	0.00156858	0.00126793	0.00112247	0.000280365	0.000819402	0.0498538	-1.02657	239	0.34251
sp|P09811|PYGL_RAT	Glycogen phosphorylase, liver form OS=Rattus norvegicus OX=10116 GN=Pygl PE=1 SV=5	0.000286401	0.000223906	0.000172372	0.000152597	3.43035e-05	0.000100256	0.0501023	-1.24937	240	0.342784
sp|Q02253|MMSA_RAT	Methylmalonate-semialdehyde dehydrogenase [acylating], mitochondrial OS=Rattus norvegicus OX=10116 GN=Aldh6a1 PE=1 SV=1	0.00293241	0.00294755	0.00230045	0.00227897	0.00196203	0.00196452	0.0504062	-0.398621	241	0.343431
sp|P62845|RS15_RAT	40S ribosomal protein S15 OS=Rattus norvegicus OX=10116 GN=Rps15 PE=1 SV=2	0.00205199	0.00168757	0.00202092	0.00161016	0.00160872	0.00156722	0.0506141	-0.267339	242	0.343423
sp|Q9Z2Q1|SC31A_RAT	Protein transport protein Sec31A OS=Rattus norvegicus OX=10116 GN=Sec31a PE=1 SV=2	0.000216565	0.000239452	0.000140768	0.000124619	0.000116725	6.82288e-05	0.0506611	-0.946933	243	0.342327
sp|D4A4T9|CHRD1_RAT	Cysteine and histidine-rich domain-containing protein 1 OS=Rattus norvegicus OX=10116 GN=Chordc1 PE=3 SV=1	1.33575e-06	2.151e-06	1.44708e-06	0.000235119	8.80906e-05	8.58185e-05	0.052602	6.37335	244	0.353986
sp|Q6IG05|K2C75_RAT	Keratin, type II cytoskeletal 75 OS=Rattus norvegicus OX=10116 GN=Krt75 PE=3 SV=2	9.98117e-05	2.151e-06	1.44708e-06	0.000335037	0.000107594	0.000314457	0.0521176	2.87209	245	0.349294
sp|P50503|F10A1_RAT	Hsc70-interacting protein OS=Rattus norvegicus OX=10116 GN=St13 PE=1 SV=1	0.000735026	0.000738822	0.000796285	0.00070493	0.000554636	0.00061752	0.0520797	-0.274282	246	0.347621
sp|P13255|GNMT_RAT	Glycine N-methyltransferase OS=Rattus norvegicus OX=10116 GN=Gnmt PE=1 SV=2	0.000369269	0.000185588	0.000400045	0.000531224	0.000497576	0.000484743	0.0527849	0.664505	247	0.350902
sp|P51647|AL1A1_RAT	Retinal dehydrogenase 1 OS=Rattus norvegicus OX=10116 GN=Aldh1a1 PE=1 SV=3	0.000593889	0.000325612	0.000643386	1.44039e-06	2.13925e-06	0.000340191	0.0534794	-2.1847	248	0.354085
sp|G3V7W1|PDCD6_RAT	Programmed cell death protein 6 OS=Rattus norvegicus OX=10116 GN=Pdcd6 PE=2 SV=1	1.33575e-06	2.151e-06	1.44708e-06	0.000135819	0.000610638	0.000743611	0.0550248	8.23846	249	0.362854
sp|Q6AYS7|ACY1A_RAT	Aminoacylase-1A OS=Rattus norvegicus OX=10116 GN=Acy1a PE=1 SV=1	0.00132593	0.00133278	0.00150826	0.00184388	0.00200104	0.00153169	0.0550546	0.367699	250	0.361599
sp|P04785|PDIA1_RAT	Protein disulfide-isomerase OS=Rattus norvegicus OX=10116 GN=P4hb PE=1 SV=2	0.00356047	0.00389935	0.00333908	0.00290503	0.00297881	0.00329263	0.0551177	-0.234873	251	0.360571
sp|Q3B7D0|HEM6_RAT	Oxygen-dependent coproporphyrinogen-III oxidase, mitochondrial OS=Rattus norvegicus OX=10116 GN=Cpox PE=1 SV=1	0.000183176	0.000245496	0.000132295	1.44039e-06	2.13925e-06	0.000128243	0.0552089	-2.08931	252	0.359734
sp|Q63598|PLST_RAT	Plastin-3 OS=Rattus norvegicus OX=10116 GN=Pls3 PE=1 SV=2	0.000300544	0.000388409	0.000418619	0.000452945	0.000647955	0.000541065	0.0554921	0.568024	253	0.36015
sp|Q6IE52|MUG2_RAT	Murinoglobulin-2 OS=Rattus norvegicus OX=10116 GN=Mug2 PE=1 SV=1	0.000168122	0.000187767	0.000121423	0.0002329	0.000241641	0.000196174	0.0555624	0.490767	254	0.359187
sp|Q63041|A1M_RAT	Alpha-1-macroglobulin OS=Rattus norvegicus OX=10116 GN=A1m PE=1 SV=1	0.000144261	0.000217509	0.000117213	0.00024212	0.000272141	0.000227247	0.0556408	0.630488	255	0.358283
sp|Q9WUW3|CFAI_RAT	Complement factor I OS=Rattus norvegicus OX=10116 GN=Cfi PE=2 SV=1	0.000268698	9.00286e-05	1.44708e-06	0.000644241	0.000386198	0.000329208	0.0558114	1.91647	256	0.357978
sp|P63102|1433Z_RAT	14-3-3 protein zeta/delta OS=Rattus norvegicus OX=10116 GN=Ywhaz PE=1 SV=1	0.000662424	0.000776818	0.000956843	0.0006353	0.000357037	0.00046377	0.0566017	-0.718562	257	0.361634
sp|P97675|ENPP3_RAT	Ectonucleotide pyrophosphatase/phosphodiesterase family member 3 OS=Rattus norvegicus OX=10116 GN=Enpp3 PE=1 SV=2	1.33575e-06	6.21455e-05	1.44708e-06	0.000148237	6.66468e-05	9.73918e-05	0.0576397	2.2659	258	0.366839
sp|Q5XI72|IF4H_RAT	Eukaryotic translation initiation factor 4H OS=Rattus norvegicus OX=10116 GN=Eif4h PE=1 SV=1	0.000545342	0.000548158	0.000708951	0.00041841	0.000235145	0.00045816	0.0579397	-0.697173	259	0.367324
sp|P16086|SPTN1_RAT	Spectrin alpha chain, non-erythrocytic 1 OS=Rattus norvegicus OX=10116 GN=Sptan1 PE=1 SV=2	0.00161944	0.00155081	0.00157659	0.00151115	0.00152159	0.00142489	0.0579451	-0.0906875	260	0.365945
sp|B2RZ78|VPS29_RAT	Vacuolar protein sorting-associated protein 29 OS=Rattus norvegicus OX=10116 GN=Vps29 PE=1 SV=2	0.000743103	0.00134449	0.000644029	0.000427606	0.000160209	0.000312153	0.0581841	-1.60181	261	0.366047
sp|P16409|MYL3_RAT	Myosin light chain 3 OS=Rattus norvegicus OX=10116 GN=Myl3 PE=1 SV=2	0.000811469	0.000815659	0.00102562	0.000648536	0.00043737	0.000710148	0.0583915	-0.562655	262	0.365949
sp|P83565|RM40_RAT	39S ribosomal protein L40, mitochondrial OS=Rattus norvegicus OX=10116 GN=Mrpl40 PE=1 SV=2	0.000787834	0.000923886	0.00128024	0.000377788	0.000566174	0.000689464	0.0585081	-0.87319	263	0.365286
sp|Q9WVE9|ITSN1_RAT	Intersectin-1 OS=Rattus norvegicus OX=10116 GN=Itsn1 PE=1 SV=2	0.000284227	0.000285695	0.000290809	0.00019687	0.000119151	0.000248738	0.0590283	-0.607926	264	0.367138
sp|P84817|FIS1_RAT	Mitochondrial fission 1 protein OS=Rattus norvegicus OX=10116 GN=Fis1 PE=1 SV=1	0.000355907	0.000715491	0.000578355	0.000853336	0.000767315	0.000934406	0.0590328	0.631106	265	0.365781
sp|P24470|CP2CN_RAT	Cytochrome P450 2C23 OS=Rattus norvegicus OX=10116 GN=Cyp2c23 PE=1 SV=2	1.33575e-06	2.151e-06	0.000177955	0.000262565	0.000885364	0.000517517	0.0598885	3.19833	266	0.369688
sp|Q62780|DDX46_RAT	Probable ATP-dependent RNA helicase DDX46 OS=Rattus norvegicus OX=10116 GN=Ddx46 PE=1 SV=1	0.000340733	0.000158073	0.000141973	2.5137e-05	2.13925e-06	8.25754e-05	0.060077	-2.54427	267	0.369462
sp|P85973|PNPH_RAT	Purine nucleoside phosphorylase OS=Rattus norvegicus OX=10116 GN=Pnp PE=1 SV=1	0.000467975	0.000282235	0.000608373	1.44039e-06	2.13925e-06	0.000294871	0.0600141	-2.18654	268	0.367698
sp|Q07803|EFGM_RAT	Elongation factor G, mitochondrial OS=Rattus norvegicus OX=10116 GN=Gfm1 PE=1 SV=2	0.000108052	3.62033e-05	3.9019e-05	1.44039e-06	2.13925e-06	1.17e-06	0.0644801	-5.27004	269	0.393592
sp|P50137|TKT_RAT	Transketolase OS=Rattus norvegicus OX=10116 GN=Tkt PE=1 SV=1	0.000911763	0.000960113	0.000940716	0.000749511	0.000608433	0.000866313	0.061005	-0.338576	270	0.371001
sp|Q704S8|CACP_RAT	Carnitine O-acetyltransferase OS=Rattus norvegicus OX=10116 GN=Crat PE=1 SV=1	0.000216046	0.000304026	0.000234052	0.00016576	0.000139735	1.17e-06	0.0610079	-1.29814	271	0.369649
sp|P84082|ARF2_RAT	ADP-ribosylation factor 2 OS=Rattus norvegicus OX=10116 GN=Arf2 PE=2 SV=1	0.00134498	0.00135192	0.00161897	0.00128991	0.000805469	0.000784694	0.0636718	-0.583546	272	0.384372
sp|Q9QX79|FETUB_RAT	Fetuin-B OS=Rattus norvegicus OX=10116 GN=Fetub PE=2 SV=2	0.000357791	0.000143855	0.000310088	0.000617653	0.00161989	0.000901776	0.0638314	1.95137	273	0.383924
sp|Q9QXQ0|ACTN4_RAT	Alpha-actinin-4 OS=Rattus norvegicus OX=10116 GN=Actn4 PE=1 SV=2	0.00115797	0.00131317	0.00135098	0.00170855	0.0014723	0.00143433	0.0640893	0.272014	274	0.384068
sp|Q63569|PRS6A_RAT	26S proteasome regulatory subunit 6A OS=Rattus norvegicus OX=10116 GN=Psmc3 PE=1 SV=1	0.00141714	0.0013006	0.00140175	0.00106366	0.000531353	0.0011	0.0643993	-0.612175	275	0.384522
sp|P04692|TPM1_RAT	Tropomyosin alpha-1 chain OS=Rattus norvegicus OX=10116 GN=Tpm1 PE=1 SV=3	0.000761943	0.000765877	0.000619084	0.000639401	0.000410676	0.000400084	0.0646594	-0.566045	276	0.384677
sp|Q62667|MVP_RAT	Major vault protein OS=Rattus norvegicus OX=10116 GN=Mvp PE=1 SV=4	0.000188495	0.000221046	0.00017017	0.000150647	0.000135461	6.59836e-05	0.0647769	-0.719382	277	0.383984
sp|Q6Q0N1|CNDP2_RAT	Cytosolic non-specific dipeptidase OS=Rattus norvegicus OX=10116 GN=Cndp2 PE=1 SV=1	0.00011389	0.000343435	0.000185073	0.000382295	0.000368311	0.000418614	0.0648277	0.864004	278	0.382903
sp|P62703|RS4X_RAT	40S ribosomal protein S4, X isoform OS=Rattus norvegicus OX=10116 GN=Rps4x PE=2 SV=2	0.00102848	0.000723652	0.000779936	0.000690456	0.000332601	0.000216015	0.0650366	-1.03106	279	0.38276
sp|Q5BK56|GSTM4_RAT	Glutathione S-transferase Mu 4 OS=Rattus norvegicus OX=10116 GN=Gstm4 PE=2 SV=1	0.000248156	0.000124719	0.000134419	0.000356992	0.000267504	0.000260605	0.0666425	0.803024	280	0.39081
sp|P13437|THIM_RAT	3-ketoacyl-CoA thiolase, mitochondrial OS=Rattus norvegicus OX=10116 GN=Acaa2 PE=1 SV=1	0.00899361	0.00814974	0.00634782	0.00561955	0.00536154	0.00629653	0.0667933	-0.443214	281	0.390301
sp|P16573|CEAM1_RAT	Carcinoembryonic antigen-related cell adhesion molecule 1 OS=Rattus norvegicus OX=10116 GN=Ceacam1 PE=1 SV=4	0.000312705	0.00031432	0.000338767	0.000399868	0.000337086	0.000383124	0.066805	0.213817	282	0.388985
sp|P32232|CBS_RAT	Cystathionine beta-synthase OS=Rattus norvegicus OX=10116 GN=Cbs PE=1 SV=3	4.82156e-05	2.151e-06	1.44708e-06	0.000231207	0.0002079	5.06345e-05	0.0679613	3.24062	283	0.39432
sp|Q6MG49|BAG6_RAT	Large proline-rich protein BAG6 OS=Rattus norvegicus OX=10116 GN=Bag6 PE=1 SV=2	1.33575e-06	9.48993e-05	5.11401e-05	9.0546e-05	0.000203546	0.000223083	0.0669818	1.81116	284	0.387268
sp|Q9JJK4|PEX3_RAT	Peroxisomal biogenesis factor 3 OS=Rattus norvegicus OX=10116 GN=Pex3 PE=1 SV=1	1.33575e-06	2.151e-06	1.44708e-06	0.00013947	0.000313527	7.636e-05	0.0693227	6.74539	285	0.399396
sp|P11030|ACBP_RAT	Acyl-CoA-binding protein OS=Rattus norvegicus OX=10116 GN=Dbi PE=1 SV=3	0.00715088	0.00906288	0.00943095	0.0146107	0.0130708	0.00979515	0.0677265	0.547331	286	0.388836
sp|Q3KRE8|TBB2B_RAT	Tubulin beta-2B chain OS=Rattus norvegicus OX=10116 GN=Tubb2b PE=1 SV=1	0.00182353	0.00177184	0.00151455	0.00186545	0.00203123	0.00204267	0.0680669	0.217005	287	0.389428
sp|P97576|GRPE1_RAT	GrpE protein homolog 1, mitochondrial OS=Rattus norvegicus OX=10116 GN=Grpel1 PE=1 SV=2	0.00112185	0.000501173	0.000540153	1.44039e-06	0.000268737	0.000261806	0.0681242	-2.0237	288	0.388402
sp|P67779|PHB_RAT	Prohibitin OS=Rattus norvegicus OX=10116 GN=Phb PE=1 SV=1	0.00218778	0.00179925	0.00204692	0.00162134	0.00182237	0.0015665	0.0682729	-0.268231	289	0.387903
sp|A1A5S1|PRP6_RAT	Pre-mRNA-processing factor 6 OS=Rattus norvegicus OX=10116 GN=Prpf6 PE=1 SV=1	5.74898e-05	2.151e-06	9.34218e-05	0.000110272	0.000123945	0.000120748	0.0663987	1.21355	290	0.375954
sp|Q62627|PAWR_RAT	PRKC apoptosis WT1 regulator protein OS=Rattus norvegicus OX=10116 GN=Pawr PE=1 SV=1	0.000325891	0.000573254	0.000706104	0.000156274	0.00017565	0.00034224	0.0695632	-1.25163	291	0.392518
sp|P61589|RHOA_RAT	Transforming protein RhoA OS=Rattus norvegicus OX=10116 GN=Rhoa PE=1 SV=1	0.00126135	0.00169049	0.00182197	0.00188176	0.0027194	0.0023549	0.069704	0.54313	292	0.391966
sp|P12075|COX5B_RAT	Cytochrome c oxidase subunit 5B, mitochondrial OS=Rattus norvegicus OX=10116 GN=Cox5b PE=1 SV=2	0.00545173	0.00505835	0.00636041	0.00623399	0.00836314	0.00770704	0.0701802	0.402811	293	0.393297
sp|Q5RK09|EIF3G_RAT	Eukaryotic translation initiation factor 3 subunit G OS=Rattus norvegicus OX=10116 GN=Eif3g PE=1 SV=1	0.000591696	0.000764681	0.000549437	0.000486402	0.000455593	0.000266306	0.0711064	-0.657427	294	0.397132
sp|Q5I0H9|PDIA5_RAT	Protein disulfide-isomerase A5 OS=Rattus norvegicus OX=10116 GN=Pdia5 PE=2 SV=1	0.000313914	0.000315535	0.000283398	0.000250884	0.000225594	0.000109888	0.0713843	-0.638574	295	0.397332
sp|P15149|CP2A2_RAT	Cytochrome P450 2A2 OS=Rattus norvegicus OX=10116 GN=Cyp2a2 PE=1 SV=1	1.33575e-06	2.151e-06	1.44708e-06	0.000105453	0.000118528	0.000346414	0.0736092	6.85311	296	0.408332
sp|Q9WUW8|ST1C2_RAT	Sulfotransferase 1C2 OS=Rattus norvegicus OX=10116 GN=Sult1c2 PE=2 SV=1	1.33575e-06	2.151e-06	1.44708e-06	8.76399e-05	9.85067e-05	0.000287898	0.0739512	6.58617	297	0.408848
sp|A1A5P2|RRS1_RAT	Ribosome biogenesis regulatory protein homolog OS=Rattus norvegicus OX=10116 GN=Rrs1 PE=2 SV=1	0.000296427	0.000297958	0.000240849	0.000213217	0.000239655	0.000155649	0.0720557	-0.456873	298	0.397032
sp|Q6AYD3|PA2G4_RAT	Proliferation-associated protein 2G4 OS=Rattus norvegicus OX=10116 GN=Pa2g4 PE=1 SV=1	0.000892478	0.000483047	0.000223122	1.44039e-06	2.13925e-06	0.000144193	0.073413	-3.4354	299	0.403157
sp|P06302|PTMA_RAT	Prothymosin alpha OS=Rattus norvegicus OX=10116 GN=Ptma PE=1 SV=2	0.00169056	0.00169929	0.00209309	0.00162134	0.00104136	0.00126812	0.0735769	-0.480121	300	0.402711
sp|P12001|RL18_RAT	60S ribosomal protein L18 OS=Rattus norvegicus OX=10116 GN=Rpl18 PE=1 SV=2	0.000719387	0.000433861	0.000467606	0.000413959	0.000155096	0.000151095	0.0745248	-1.17039	301	0.406544
sp|P32755|HPPD_RAT	4-hydroxyphenylpyruvate dioxygenase OS=Rattus norvegicus OX=10116 GN=Hpd PE=1 SV=3	0.00137654	0.00110692	0.00134214	0.00112215	0.000816127	0.00101192	0.0769943	-0.374874	302	0.418625
sp|P41542|USO1_RAT	General vesicular transport factor p115 OS=Rattus norvegicus OX=10116 GN=Uso1 PE=1 SV=1	0.000225643	0.000340212	0.000305561	0.000486909	0.000395259	0.000355444	0.0773045	0.506126	303	0.418924
sp|Q498D5|RMD2_RAT	Regulator of microtubule dynamics protein 2 OS=Rattus norvegicus OX=10116 GN=Rmdn2 PE=1 SV=1	1.33575e-06	0.000131984	0.000142249	0.000188894	0.000212315	0.000344732	0.0775997	1.43665	304	0.419141
sp|B5DEH2|ERLN2_RAT	Erlin-2 OS=Rattus norvegicus OX=10116 GN=Erlin2 PE=1 SV=1	0.000159581	0.000240607	0.000172881	0.00045914	0.000602082	0.00025138	0.0784401	1.19565	305	0.42229
sp|Q9WUC4|ATOX1_RAT	Copper transport protein ATOX1 OS=Rattus norvegicus OX=10116 GN=Atox1 PE=1 SV=1	0.00358001	0.00199916	0.00301652	0.00190746	0.00171518	0.00167094	0.0784524	-0.699373	306	0.420977
sp|Q9Z311|MECR_RAT	Enoyl-[acyl-carrier-protein] reductase, mitochondrial OS=Rattus norvegicus OX=10116 GN=Mecr PE=1 SV=1	0.000797691	0.000947593	0.00070705	0.000625932	0.000469029	0.000685398	0.0785072	-0.461987	307	0.419898
sp|P10860|DHE3_RAT	Glutamate dehydrogenase 1, mitochondrial OS=Rattus norvegicus OX=10116 GN=Glud1 PE=1 SV=2	0.00256917	0.00229008	0.00178551	0.00176662	0.00146312	0.00167992	0.0787886	-0.436591	308	0.420035
sp|P13803|ETFA_RAT	Electron transfer flavoprotein subunit alpha, mitochondrial OS=Rattus norvegicus OX=10116 GN=Etfa PE=1 SV=4	0.00438632	0.00375579	0.00307993	0.00241497	0.00175123	0.00315621	0.078839	-0.615943	309	0.418944
sp|Q9Z2S9|FLOT2_RAT	Flotillin-2 OS=Rattus norvegicus OX=10116 GN=Flot2 PE=1 SV=1	0.000315993	0.000317624	0.00047926	0.000242443	0.000204378	0.000265476	0.0791821	-0.643741	310	0.41941
sp|O88813|ACSL5_RAT	Long-chain-fatty-acid--CoA ligase 5 OS=Rattus norvegicus OX=10116 GN=Acsl5 PE=1 SV=1	0.000158413	7.96153e-05	1.44708e-06	0.000189908	0.000170764	0.00029113	0.0793115	1.44456	311	0.418744
sp|Q6AXS3|DEK_RAT	Protein DEK OS=Rattus norvegicus OX=10116 GN=Dek PE=1 SV=1	0.000500907	0.00028771	0.00038761	0.000274512	0.000231413	0.000225444	0.07978	-0.685495	312	0.419868
sp|P13084|NPM_RAT	Nucleophosmin OS=Rattus norvegicus OX=10116 GN=Npm1 PE=1 SV=1	0.00231584	0.00186224	0.00200708	0.00115493	0.00189727	0.00126465	0.0802087	-0.518832	313	0.420775
sp|P60711|ACTB_RAT,sp|P63259|ACTG_RAT	Actin, cytoplasmic 1 OS=Rattus norvegicus OX=10116 GN=Actb PE=1 SV=1,Actin, cytoplasmic 2 OS=Rattus norvegicus OX=10116 GN=Actg1 PE=1 SV=1	0.00245244	0.00253761	0.00250055	0.0015219	0.00194387	0.00234822	0.080227	-0.365553	314	0.419531
sp|Q6AYR8|SCRN2_RAT	Secernin-2 OS=Rattus norvegicus OX=10116 GN=Scrn2 PE=2 SV=1	6.39455e-05	0.000192827	0.000207825	0.000245309	0.000275726	0.000268614	0.0805973	0.765229	315	0.42013
sp|P18757|CGL_RAT	Cystathionine gamma-lyase OS=Rattus norvegicus OX=10116 GN=Cth PE=1 SV=2	0.00115536	0.00109301	0.0011044	0.000847333	0.000732613	0.00107058	0.0814674	-0.339075	316	0.423321
sp|Q63150|DPYS_RAT	Dihydropyrimidinase OS=Rattus norvegicus OX=10116 GN=Dpys PE=1 SV=2	0.000312705	0.000366706	0.000395228	0.000949686	0.000730354	0.000437856	0.0815824	0.978781	317	0.422581
sp|Q68FR8|TBA3_RAT	Tubulin alpha-3 chain OS=Rattus norvegicus OX=10116 GN=Tuba3a PE=2 SV=1	0.000601088	0.000302096	0.000586066	0.000864714	0.000842342	0.000631243	0.0818942	0.650873	318	0.422863
sp|Q4KLH4|PSPC1_RAT	Paraspeckle component 1 OS=Rattus norvegicus OX=10116 GN=Pspc1 PE=1 SV=1	0.000155454	0.000104171	0.000224546	4.96962e-05	2.13925e-06	0.000108835	0.0815348	-1.59141	319	0.419687
sp|P63324|RS12_RAT	40S ribosomal protein S12 OS=Rattus norvegicus OX=10116 GN=Rps12 PE=1 SV=2	0.0012295	0.0016478	0.00110997	0.00196526	0.00154626	0.00193677	0.0829868	0.450401	320	0.425826
sp|Q9R1T3|CATZ_RAT	Cathepsin Z OS=Rattus norvegicus OX=10116 GN=Ctsz PE=1 SV=2	0.000441977	8.88518e-05	0.000191525	1.44039e-06	2.13925e-06	1.17e-06	0.0847036	-7.24874	321	0.433281
sp|P10888|COX41_RAT	Cytochrome c oxidase subunit 4 isoform 1, mitochondrial OS=Rattus norvegicus OX=10116 GN=Cox4i1 PE=1 SV=1	0.000960318	0.000804398	0.00121375	0.001228	0.00172532	0.00134466	0.0835259	0.529091	322	0.42593
sp|Q62930|CO9_RAT	Complement component C9 OS=Rattus norvegicus OX=10116 GN=C9 PE=1 SV=1	0.000195299	0.000245385	0.000211576	0.000234128	0.00031579	0.000307646	0.0837335	0.394797	323	0.425667
sp|O88794|PNPO_RAT	Pyridoxine-5'-phosphate oxidase OS=Rattus norvegicus OX=10116 GN=Pnpo PE=1 SV=1	0.000621815	0.000520855	0.000898186	0.000993924	0.000893731	0.00130602	0.0837576	0.646043	324	0.424475
sp|Q63081|PDIA6_RAT	Protein disulfide-isomerase A6 OS=Rattus norvegicus OX=10116 GN=Pdia6 PE=1 SV=2	0.000860649	0.00111226	0.00126537	0.000648536	0.00072895	0.000903825	0.0849181	-0.505366	325	0.429032
sp|P81828|UP2_RAT	Urinary protein 2 OS=Rattus norvegicus OX=10116 PE=1 SV=1	0.00107125	0.000807583	0.00145066	0.000513692	0.000288693	0.000843741	0.0852195	-1.01623	326	0.429235
sp|P07379|PCKGC_RAT	Phosphoenolpyruvate carboxykinase, cytosolic [GTP] OS=Rattus norvegicus OX=10116 GN=Pck1 PE=1 SV=1	0.000173948	4.37116e-05	1.44708e-06	0.000417065	0.000328144	0.000137006	0.0861759	2.0095	327	0.432724
sp|P57093|PAHX_RAT	Phytanoyl-CoA dioxygenase, peroxisomal OS=Rattus norvegicus OX=10116 GN=Phyh PE=1 SV=2	0.000480159	0.000804398	0.000260088	0.001535	0.00112146	0.000756371	0.0861857	1.14369	328	0.431454
sp|P00388|NCPR_RAT	NADPH--cytochrome P450 reductase OS=Rattus norvegicus OX=10116 GN=Por PE=1 SV=3	0.000119686	2.151e-06	4.32202e-05	0.000153047	0.000129018	0.00012569	0.0848962	1.30474	329	0.423707
sp|P04644|RS17_RAT	40S ribosomal protein S17 OS=Rattus norvegicus OX=10116 GN=Rps17 PE=1 SV=3	0.00180326	0.00140978	0.00151943	0.000768635	0.00129591	0.00126249	0.0862565	-0.50836	330	0.429191
sp|Q75N33|SC16B_RAT	Protein transport protein Sec16B OS=Rattus norvegicus OX=10116 GN=Sec16b PE=1 SV=1	2.55903e-05	0.00020578	0.000277231	1.44039e-06	2.13925e-06	1.17e-06	0.0883039	-6.74257	331	0.438052
sp|B2GV05|RBM5_RAT	RNA-binding protein 5 OS=Rattus norvegicus OX=10116 GN=Rbm5 PE=1 SV=1	6.63778e-05	6.67206e-05	3.5955e-05	3.183e-05	2.13925e-06	3.48539e-05	0.0839048	-1.29651	332	0.414975
sp|Q6P0K8|PLAK_RAT	Junction plakoglobin OS=Rattus norvegicus OX=10116 GN=Jup PE=1 SV=1	0.000181537	0.000109484	7.86666e-05	1.44039e-06	3.91382e-05	7.62575e-05	0.0870494	-1.66182	333	0.429235
sp|Q5XIM9|TCPB_RAT	T-complex protein 1 subunit beta OS=Rattus norvegicus OX=10116 GN=Cct2 PE=1 SV=3	0.000808941	0.000508199	0.000383408	0.000242443	0.000272505	0.000318571	0.0872536	-1.02871	334	0.428953
sp|P85125|CAVN1_RAT	Caveolae-associated protein 1 OS=Rattus norvegicus OX=10116 GN=Cavin1 PE=1 SV=1	0.000483017	0.00055487	0.00067278	0.000330886	0.00029753	0.000507249	0.088193	-0.591022	335	0.432277
sp|Q3KR86|MIC60_RAT	MICOS complex subunit Mic60 (Fragment) OS=Rattus norvegicus OX=10116 GN=Immt PE=1 SV=1	0.000666231	0.000625026	0.000433054	0.000937129	0.000766055	0.000699654	0.0883092	0.478719	336	0.431559
sp|Q62848|ARFG1_RAT	ADP-ribosylation factor GTPase-activating protein 1 OS=Rattus norvegicus OX=10116 GN=Arfgap1 PE=1 SV=1	0.000586604	0.000851692	0.000635493	0.000187528	0.000562082	0.000410688	0.0885553	-0.837774	337	0.431477
sp|Q66HF9|LRRF1_RAT	Leucine-rich repeat flightless-interacting protein 1 OS=Rattus norvegicus OX=10116 GN=Lrrfip1 PE=1 SV=1	0.000439821	0.000626297	0.00087354	0.000281208	0.000395095	0.000384904	0.0887132	-0.870096	338	0.430968
sp|P62961|YBOX1_RAT	Y-box-binding protein 1 OS=Rattus norvegicus OX=10116 GN=Ybx1 PE=2 SV=3	0.00168006	0.00194205	0.00236611	0.000966761	0.0015394	0.00158791	0.089017	-0.54859	339	0.431168
sp|Q63707|PYRD_RAT	Dihydroorotate dehydrogenase (quinone), mitochondrial OS=Rattus norvegicus OX=10116 GN=Dhodh PE=1 SV=1	0.000273914	6.8832e-05	0.000148371	6.56745e-05	2.13925e-06	1.17e-06	0.0906591	-2.83174	340	0.43783
sp|Q9JJ54|HNRPD_RAT	Heterogeneous nuclear ribonucleoprotein D0 OS=Rattus norvegicus OX=10116 GN=Hnrnpd PE=1 SV=2	0.000689634	0.000616173	0.000830122	0.000808373	0.000908606	0.000885171	0.0895889	0.28484	341	0.431393
sp|P38062|MAP2_RAT	Methionine aminopeptidase 2 OS=Rattus norvegicus OX=10116 GN=Metap2 PE=1 SV=2	0.000282939	0.00017064	0.000490432	0.000759791	0.000732	0.000415986	0.0905628	1.01502	342	0.434808
sp|P15257|HNF1A_RAT	Hepatocyte nuclear factor 1-alpha OS=Rattus norvegicus OX=10116 GN=Hnf1a PE=1 SV=1	8.61432e-05	0.000129882	1.44708e-06	0.000165232	0.00023215	0.000135697	0.0900964	1.29352	343	0.431307
sp|P13601|AL1A7_RAT	Aldehyde dehydrogenase, cytosolic 1 OS=Rattus norvegicus OX=10116 GN=Aldh1a7 PE=1 SV=2	0.00043192	0.000271344	0.000292448	1.44039e-06	2.13925e-06	0.000283492	0.0909467	-1.79432	344	0.434112
sp|Q5U301|AKAP2_RAT	A-kinase anchor protein 2 OS=Rattus norvegicus OX=10116 GN=Akap2 PE=1 SV=1	6.21815e-05	0.000187508	0.000303138	1.44039e-06	6.70298e-05	1.17e-06	0.0918294	-2.98884	345	0.437055
sp|P18576|NFYA_RAT	Nuclear transcription factor Y subunit alpha OS=Rattus norvegicus OX=10116 GN=Nfya PE=1 SV=1	0.000237967	0.000159464	0.000171867	1.44039e-06	2.13925e-06	0.000166604	0.0912539	-1.7421	346	0.433061
sp|Q5XI22|THIC_RAT	Acetyl-CoA acetyltransferase, cytosolic OS=Rattus norvegicus OX=10116 GN=Acat2 PE=1 SV=1	0.0002044	0.000205456	0.000221436	0.000196031	2.13925e-06	1.17e-06	0.091196	-1.66307	347	0.431538
sp|Q5XIU9|PGRC2_RAT	Membrane-associated progesterone receptor component 2 OS=Rattus norvegicus OX=10116 GN=Pgrmc2 PE=1 SV=1	0.000249299	0.000626466	0.000675191	0.00119546	0.000671843	0.00104722	0.091877	0.910101	348	0.433512
sp|P62074|TIM10_RAT	Mitochondrial import inner membrane translocase subunit Tim10 OS=Rattus norvegicus OX=10116 GN=Timm10 PE=3 SV=1	0.0027049	0.00181258	0.00162796	0.00259414	0.00323978	0.00284059	0.0919629	0.497268	349	0.432674
sp|P18420|PSA1_RAT	Proteasome subunit alpha type-1 OS=Rattus norvegicus OX=10116 GN=Psma1 PE=1 SV=2	0.000514239	0.000413515	0.000222839	0.000197273	0.000221734	1.17e-06	0.0919628	-1.45331	350	0.431437
sp|Q5PQN0|NCALD_RAT	Neurocalcin-delta OS=Rattus norvegicus OX=10116 GN=Ncald PE=1 SV=3	1.33575e-06	2.151e-06	1.44708e-06	0.000134412	0.000906466	0.000441543	0.0932193	8.23103	351	0.436086
sp|Q9R1B1|T10B_RAT	Mitochondrial import inner membrane translocase subunit Tim10 B OS=Rattus norvegicus OX=10116 GN=Timm10b PE=3 SV=1	1.33575e-06	0.000543773	0.000586066	0.00129707	0.0014579	0.000568119	0.0927418	1.5547	352	0.432619
sp|Q4KLZ6|TKFC_RAT	Triokinase/FMN cyclase OS=Rattus norvegicus OX=10116 GN=Tkfc PE=1 SV=1	0.00074876	0.000470392	0.000506978	0.00067322	0.00121071	0.00103205	0.0930104	0.756441	353	0.432643
sp|P04256|ROA1_RAT	Heterogeneous nuclear ribonucleoprotein A1 OS=Rattus norvegicus OX=10116 GN=Hnrnpa1 PE=1 SV=3	0.00084528	0.000679716	0.00064101	0.000486402	0.000273356	0.00062138	0.0930146	-0.64918	354	0.431441
sp|P17074|RS19_RAT	40S ribosomal protein S19 OS=Rattus norvegicus OX=10116 GN=Rps19 PE=2 SV=3	0.00205199	0.00206259	0.00141464	0.00143125	0.00140763	0.000979515	0.0930834	-0.53411	355	0.430543
sp|P29147|BDH_RAT	D-beta-hydroxybutyrate dehydrogenase, mitochondrial OS=Rattus norvegicus OX=10116 GN=Bdh1 PE=1 SV=2	0.0015772	0.00142681	0.000939756	0.00075631	0.000850087	0.000993794	0.0935766	-0.600956	356	0.431609
sp|Q10758|K2C8_RAT	Keratin, type II cytoskeletal 8 OS=Rattus norvegicus OX=10116 GN=Krt8 PE=1 SV=3	0.00375213	0.00332118	0.00260878	0.00424301	0.00368248	0.00429324	0.0939914	0.335702	357	0.432308
sp|O08816|WASL_RAT	Neural Wiskott-Aldrich syndrome protein OS=Rattus norvegicus OX=10116 GN=Wasl PE=1 SV=2	0.00021596	0.000162806	0.000292448	5.17793e-05	0.000116399	0.000170095	0.094474	-0.988582	358	0.433314
sp|P20070|NB5R3_RAT	NADH-cytochrome b5 reductase 3 OS=Rattus norvegicus OX=10116 GN=Cyb5r3 PE=1 SV=2	0.000629046	0.000722622	0.000876179	0.000948025	0.00154993	0.00103809	0.0956361	0.666486	359	0.437422
sp|P28023|DCTN1_RAT	Dynactin subunit 1 OS=Rattus norvegicus OX=10116 GN=Dctn1 PE=1 SV=2	0.000232452	0.000106206	0.000228932	0.000101334	2.13925e-06	0.000110961	0.0954036	-1.40432	360	0.435146
sp|Q5RJR8|LRC59_RAT	Leucine-rich repeat-containing protein 59 OS=Rattus norvegicus OX=10116 GN=Lrrc59 PE=1 SV=1	0.00167404	0.00194837	0.00200446	0.0014365	0.00151963	0.00175802	0.096099	-0.255335	361	0.437104
sp|O35952|GLO2_RAT	Hydroxyacylglutathione hydrolase, mitochondrial OS=Rattus norvegicus OX=10116 GN=Hagh PE=1 SV=2	0.00140059	0.00184777	0.00170699	0.00201487	0.00207597	0.00183857	0.0963475	0.258901	362	0.437024
sp|P01946|HBA_RAT	Hemoglobin subunit alpha-1/2 OS=Rattus norvegicus OX=10116 GN=Hba1 PE=1 SV=3	0.00647651	0.00670143	0.0103181	0.0147976	0.0416836	0.0206043	0.0966733	1.71404	363	0.437294
sp|P20673|ARLY_RAT	Argininosuccinate lyase OS=Rattus norvegicus OX=10116 GN=Asl PE=2 SV=1	1.33575e-06	2.151e-06	1.44708e-06	0.000225088	6.32494e-05	6.16181e-05	0.101218	6.14832	364	0.456591
sp|Q07116|SUOX_RAT	Sulfite oxidase, mitochondrial OS=Rattus norvegicus OX=10116 GN=Suox PE=1 SV=2	0.000743103	0.000746941	0.000697698	0.00118779	0.000801043	0.000936459	0.0980915	0.419141	365	0.441277
sp|P52296|IMB1_RAT	Importin subunit beta-1 OS=Rattus norvegicus OX=10116 GN=Kpnb1 PE=1 SV=1	1.33575e-06	2.151e-06	3.34895e-05	5.92947e-05	3.33234e-05	3.24639e-05	0.0998489	1.7582	366	0.447956
sp|Q5U300|UBA1_RAT	Ubiquitin-like modifier-activating enzyme 1 OS=Rattus norvegicus OX=10116 GN=Uba1 PE=1 SV=1	0.00046019	0.000385472	0.000332363	0.000196154	8.26786e-05	0.000349033	0.0988651	-0.907841	367	0.442334
sp|Q91XU1|QKI_RAT	Protein quaking OS=Rattus norvegicus OX=10116 GN=Qki PE=1 SV=2	0.000475935	0.000637857	0.000343734	0.000304298	0.000342029	0.000166604	0.0990248	-0.842316	368	0.441844
sp|P60123|RUVB1_RAT	RuvB-like 1 OS=Rattus norvegicus OX=10116 GN=Ruvbl1 PE=1 SV=1	0.000118636	5.96242e-05	6.42616e-05	1.44039e-06	2.13925e-06	6.22937e-05	0.100441	-1.88035	369	0.446947
sp|P35434|ATPD_RAT	ATP synthase subunit delta, mitochondrial OS=Rattus norvegicus OX=10116 GN=Atp5f1d PE=1 SV=2	0.000966034	0.00161837	0.0013954	0.0023162	0.00208271	0.00152175	0.100164	0.573061	370	0.444512
sp|Q63355|MYO1C_RAT	Unconventional myosin-Ic OS=Rattus norvegicus OX=10116 GN=Myo1c PE=1 SV=2	2.5909e-05	5.20855e-05	2.80683e-05	1.44039e-06	2.13925e-06	2.72087e-05	0.103173	-1.78446	371	0.456631
sp|Q66H20|PTBP2_RAT,sp|Q9Z118|PTBP3_RAT	Polypyrimidine tract-binding protein 2 OS=Rattus norvegicus OX=10116 GN=Ptbp2 PE=1 SV=1,Polypyrimidine tract-binding protein 3 OS=Rattus norvegicus OX=10116 GN=Ptbp3 PE=2 SV=1	5.09397e-05	0.000102405	0.00011037	4.88539e-05	2.13925e-06	5.34952e-05	0.0992291	-1.33564	372	0.437995
sp|Q63530|PTER_RAT	Phosphotriesterase-related protein OS=Rattus norvegicus OX=10116 GN=Pter PE=2 SV=2	0.000155008	0.000311618	0.000335854	0.000148661	2.13925e-06	0.000162785	0.100126	-1.35561	373	0.440769
sp|Q9Z269|VAPB_RAT	Vesicle-associated membrane protein-associated protein B OS=Rattus norvegicus OX=10116 GN=Vapb PE=1 SV=3	0.000222625	0.000335662	0.00012059	0.000747284	0.00179988	0.000584484	0.10152	2.2057	374	0.44571
sp|O08815|SLK_RAT	STE20-like serine/threonine-protein kinase OS=Rattus norvegicus OX=10116 GN=Slk PE=1 SV=1	8.97146e-05	0.000135267	9.71917e-05	4.30206e-05	4.83549e-05	9.42154e-05	0.101806	-0.795711	375	0.445774
sp|P41565|IDHG1_RAT	Isocitrate dehydrogenase [NAD] subunit gamma 1, mitochondrial OS=Rattus norvegicus OX=10116 GN=Idh3g PE=1 SV=2	0.000137654	0.000138365	0.000223689	1.44039e-06	2.13925e-06	0.000144559	0.102327	-1.75413	376	0.446863
sp|P14604|ECHM_RAT	Enoyl-CoA hydratase, mitochondrial OS=Rattus norvegicus OX=10116 GN=Echs1 PE=1 SV=1	0.00214526	0.00131256	0.00141464	0.00125234	0.000603269	0.000979515	0.103164	-0.781236	377	0.449326
sp|P06866|HPT_RAT	Haptoglobin OS=Rattus norvegicus OX=10116 GN=Hp PE=1 SV=3	0.00132517	0.000861888	0.00118227	0.00149518	0.0017646	0.00130978	0.10331	0.439602	378	0.44877
sp|P0DP29|CALM1_RAT,sp|P0DP30|CALM2_RAT,sp|P0DP31|CALM3_RAT	Calmodulin-1 OS=Rattus norvegicus OX=10116 GN=Calm1 PE=1 SV=1,Calmodulin-2 OS=Rattus norvegicus OX=10116 GN=Calm2 PE=1 SV=1,Calmodulin-3 OS=Rattus norvegicus OX=10116 GN=Calm3 PE=1 SV=1	0.00526456	0.00675154	0.00727666	0.00748645	0.0088061	0.00762575	0.103479	0.310055	379	0.448319
sp|Q7TPJ0|SSRA_RAT	Translocon-associated protein subunit alpha OS=Rattus norvegicus OX=10116 GN=Ssr1 PE=1 SV=1	0.000169586	0.000255693	0.00018372	0.000243963	0.000274213	0.00026714	0.105372	0.366836	380	0.455318
sp|Q505J8|SYFA_RAT	Phenylalanine--tRNA ligase alpha subunit OS=Rattus norvegicus OX=10116 GN=Farsa PE=1 SV=1	0.000372722	0.000321126	0.000230735	5.10658e-05	5.73976e-05	0.000279586	0.105598	-1.25256	381	0.455099
sp|P70584|ACDSB_RAT	Short/branched chain specific acyl-CoA dehydrogenase, mitochondrial OS=Rattus norvegicus OX=10116 GN=Acadsb PE=1 SV=1	0.00037568	0.00018881	6.78317e-05	6.00496e-05	2.13925e-06	1.17e-06	0.107272	-3.31904	382	0.461102
sp|Q62894|ECM1_RAT	Extracellular matrix protein 1 OS=Rattus norvegicus OX=10116 GN=Ecm1 PE=1 SV=2	0.000192519	0.00029027	0.000208564	0.000184636	0.000155648	0.000151633	0.106342	-0.491009	383	0.455912
sp|Q6AXT5|RAB21_RAT	Ras-related protein Rab-21 OS=Rattus norvegicus OX=10116 GN=Rab21 PE=2 SV=1	1.33575e-06	0.000243844	0.00026281	0.000465317	0.000261507	0.000636904	0.106363	1.42468	384	0.454812
sp|Q99MZ8|LASP1_RAT	LIM and SH3 domain protein 1 OS=Rattus norvegicus OX=10116 GN=Lasp1 PE=1 SV=1	0.000822782	0.00134393	0.00155987	0.000789093	0.000665201	0.000864059	0.106743	-0.684752	385	0.455252
sp|P62890|RL30_RAT	60S ribosomal protein L30 OS=Rattus norvegicus OX=10116 GN=Rpl30 PE=3 SV=2	0.00117604	0.00118211	0.000764434	0.000676733	2.13925e-06	0.000741024	0.106847	-1.13696	386	0.454514
sp|Q5RKI9|RRFM_RAT	Ribosome-recycling factor, mitochondrial OS=Rattus norvegicus OX=10116 GN=Mrrf PE=2 SV=1	0.000206481	0.000207547	0.000335534	0.000198026	2.13925e-06	0.00010842	0.107185	-1.28038	387	0.454777
sp|P04355|MT2_RAT	Metallothionein-2 OS=Rattus norvegicus OX=10116 GN=Mt2 PE=1 SV=1	0.000443426	0.00133715	0.000960764	0.000425269	2.13925e-06	0.000465671	0.107948	-1.61802	388	0.456832
sp|Q6TMG5|NEMO_RAT	NF-kappa-B essential modulator OS=Rattus norvegicus OX=10116 GN=Ikbkg PE=2 SV=1	1.33575e-06	0.000197976	1.44708e-06	0.000188894	0.000212315	0.000206839	0.108468	1.59873	389	0.457854
sp|P35281|RAB10_RAT,sp|P35289|RAB15_RAT,sp|Q5U316|RAB35_RAT	Ras-related protein Rab-10 OS=Rattus norvegicus OX=10116 GN=Rab10 PE=1 SV=1,Ras-related protein Rab-15 OS=Rattus norvegicus OX=10116 GN=Rab15 PE=2 SV=1,Ras-related protein Rab-35 OS=Rattus norvegicus OX=10116 GN=Rab35 PE=1 SV=1	1.33575e-06	0.000271886	1.44708e-06	0.000259414	0.00029158	0.000284059	0.10848	1.60417	390	0.456728
sp|P80067|CATC_RAT	Dipeptidyl peptidase 1 OS=Rattus norvegicus OX=10116 GN=Ctsc PE=1 SV=3	0.000526928	0.000529649	0.000697698	0.000505352	0.000441788	0.000430393	0.109032	-0.348788	391	0.457879
sp|P70580|PGRC1_RAT	Membrane-associated progesterone receptor component 1 OS=Rattus norvegicus OX=10116 GN=Pgrmc1 PE=1 SV=3	0.00263554	0.00264915	0.00270492	0.00292672	0.00284103	0.00349612	0.109035	0.213491	392	0.456723
sp|P62250|RS16_RAT	40S ribosomal protein S16 OS=Rattus norvegicus OX=10116 GN=Rps16 PE=1 SV=2	0.0016674	0.00167601	0.00080283	0.000888405	2.13925e-06	0.000778245	0.109206	-1.313	393	0.456277
sp|P21571|ATP5J_RAT	ATP synthase-coupling factor 6, mitochondrial OS=Rattus norvegicus OX=10116 GN=Atp5pf PE=1 SV=1	0.00776405	0.00931463	0.00813981	0.00912754	0.0113392	0.00973166	0.109301	0.259991	394	0.455514
sp|Q8VHV7|HNRH1_RAT	Heterogeneous nuclear ribonucleoprotein H OS=Rattus norvegicus OX=10116 GN=Hnrnph1 PE=1 SV=2	0.000361456	0.000423876	0.000456844	0.000346656	0.00012988	0.000316324	0.110589	-0.647732	395	0.459715
sp|P04904|GSTA3_RAT	Glutathione S-transferase alpha-3 OS=Rattus norvegicus OX=10116 GN=Gsta3 PE=1 SV=3	0.00171351	0.00147631	0.00132594	0.00176073	0.00171518	0.00218507	0.111296	0.326083	396	0.461484
sp|P55281|CAD17_RAT	Cadherin-17 OS=Rattus norvegicus OX=10116 GN=Cdh17 PE=2 SV=1	1.33575e-06	6.57525e-05	1.44708e-06	0.000345049	0.00042309	3.43482e-05	0.112505	3.54956	397	0.465323
sp|Q08163|CAP1_RAT	Adenylyl cyclase-associated protein 1 OS=Rattus norvegicus OX=10116 GN=Cap1 PE=1 SV=3	0.000342392	0.00034416	0.000432749	0.000328372	0.000307574	0.000239713	0.11268	-0.354158	398	0.464875
sp|P28492|GLSL_RAT	Glutaminase liver isoform, mitochondrial OS=Rattus norvegicus OX=10116 GN=Gls2 PE=2 SV=3	8.98637e-05	9.03277e-05	9.73532e-05	0.000258552	0.000242176	9.43719e-05	0.112831	1.10041	399	0.464332
sp|Q9WU74|LSR_RAT	Lipolysis-stimulated lipoprotein receptor OS=Rattus norvegicus OX=10116 GN=Lsr PE=1 SV=1	0.000136841	0.000137548	0.000197661	4.37461e-05	2.13925e-06	0.000143706	0.113404	-1.31605	400	0.465525
sp|P36953|AFAM_RAT	Afamin OS=Rattus norvegicus OX=10116 GN=Afm PE=3 SV=1	0.000355907	0.000268309	0.000240981	0.000426668	0.000383658	0.000327042	0.114577	0.394598	401	0.469167
sp|P10959|EST1C_RAT,sp|Q63108|EST1E_RAT	Carboxylesterase 1C OS=Rattus norvegicus OX=10116 GN=Ces1c PE=1 SV=3,Carboxylesterase 1E OS=Rattus norvegicus OX=10116 GN=Ces1e PE=1 SV=1	4.92695e-05	4.95239e-05	1.44708e-06	1.44039e-06	2.13925e-06	1.17e-06	0.117298	-4.3995	402	0.479114
sp|O35179|SH3G2_RAT	Endophilin-A1 OS=Rattus norvegicus OX=10116 GN=Sh3gl2 PE=1 SV=2	7.68436e-05	7.72405e-05	1.44708e-06	1.44039e-06	2.13925e-06	1.17e-06	0.116855	-5.03324	403	0.476121
sp|P11883|AL3A1_RAT	Aldehyde dehydrogenase, dimeric NADP-preferring OS=Rattus norvegicus OX=10116 GN=Aldh3a1 PE=1 SV=3	5.97107e-05	6.00191e-05	1.44708e-06	1.44039e-06	2.13925e-06	1.17e-06	0.11708	-4.67315	404	0.475853
sp|P62718|RL18A_RAT	60S ribosomal protein L18a OS=Rattus norvegicus OX=10116 GN=Rpl18a PE=2 SV=1	0.000153687	0.000154481	1.44708e-06	1.44039e-06	2.13925e-06	1.17e-06	0.116479	-6.02651	405	0.472243
sp|Q4V8C7|PRKRA_RAT	Interferon-inducible double-stranded RNA-dependent protein kinase activator A OS=Rattus norvegicus OX=10116 GN=Prkra PE=1 SV=1	0.000172837	0.000173729	1.44708e-06	1.44039e-06	2.13925e-06	1.17e-06	0.116438	-6.19518	406	0.470915
sp|Q6AYK1|RNPS1_RAT	RNA-binding protein with serine-rich domain 1 OS=Rattus norvegicus OX=10116 GN=Rnps1 PE=2 SV=1	8.86851e-05	8.91431e-05	1.44708e-06	1.44039e-06	2.13925e-06	1.17e-06	0.116753	-5.23821	407	0.471029
sp|Q63228|GMFB_RAT	Glia maturation factor beta OS=Rattus norvegicus OX=10116 GN=Gmfb PE=1 SV=2	0.000190486	0.000191469	1.44708e-06	1.44039e-06	2.13925e-06	1.17e-06	0.116408	-6.3349	408	0.468485
sp|Q8K1Q0|NMT1_RAT	Glycylpeptide N-tetradecanoyltransferase 1 OS=Rattus norvegicus OX=10116 GN=Nmt1 PE=1 SV=1	5.45342e-05	5.48158e-05	1.44708e-06	1.44039e-06	2.13925e-06	1.17e-06	0.117177	-4.54396	409	0.470426
sp|Q4V7C6|GUAA_RAT	GMP synthase [glutamine-hydrolyzing] OS=Rattus norvegicus OX=10116 GN=Gmps PE=1 SV=1	3.90317e-05	3.92332e-05	1.44708e-06	1.44039e-06	2.13925e-06	1.17e-06	0.117637	-4.06891	410	0.47112
sp|Q27W01|RBM8A_RAT	RNA-binding protein 8A OS=Rattus norvegicus OX=10116 GN=Rbm8a PE=1 SV=1	0.000155454	0.000156257	1.44708e-06	1.44039e-06	2.13925e-06	1.17e-06	0.116475	-6.04293	411	0.465332
sp|Q9Z1J8|S14L3_RAT	SEC14-like protein 3 OS=Rattus norvegicus OX=10116 GN=Sec14l3 PE=1 SV=1	1.33575e-06	2.151e-06	1.44708e-06	1.44039e-06	0.00014579	0.00014203	0.116762	5.87352	412	0.465346
sp|Q64565|AGT2_RAT	Alanine--glyoxylate aminotransferase 2, mitochondrial OS=Rattus norvegicus OX=10116 GN=Agxt2 PE=1 SV=2	1.33575e-06	2.151e-06	1.44708e-06	1.44039e-06	5.69492e-05	5.54803e-05	0.117708	4.52854	413	0.467982
sp|P45380|S26A1_RAT	Sulfate anion transporter 1 OS=Rattus norvegicus OX=10116 GN=Slc26a1 PE=1 SV=1	1.33575e-06	2.151e-06	1.44708e-06	1.44039e-06	4.14765e-05	4.04067e-05	0.118317	4.07795	414	0.469267
sp|Q3T1J9|MOB1A_RAT	MOB kinase activator 1A OS=Rattus norvegicus OX=10116 GN=Mob1a PE=2 SV=3	1.33575e-06	2.151e-06	1.44708e-06	1.44039e-06	0.000134991	0.000131509	0.116809	5.76306	415	0.462168
sp|P63095|GNAS2_RAT,sp|Q63803|GNAS1_RAT	Guanine nucleotide-binding protein G(s) subunit alpha isoforms short OS=Rattus norvegicus OX=10116 GN=Gnas PE=1 SV=1,Guanine nucleotide-binding protein G(s) subunit alpha isoforms XLas OS=Rattus norvegicus OX=10116 GN=Gnas PE=1 SV=3	1.33575e-06	2.151e-06	1.44708e-06	1.44039e-06	7.4005e-05	7.20963e-05	0.117343	4.90227	416	0.463167
sp|P54921|SNAA_RAT	Alpha-soluble NSF attachment protein OS=Rattus norvegicus OX=10116 GN=Napa PE=1 SV=2	1.33575e-06	2.151e-06	1.44708e-06	1.44039e-06	9.88406e-05	9.62913e-05	0.117044	5.31621	417	0.460877
sp|P62138|PP1A_RAT	Serine/threonine-protein phosphatase PP1-alpha catalytic subunit OS=Rattus norvegicus OX=10116 GN=Ppp1ca PE=1 SV=1	1.33575e-06	0.000741508	0.000710383	1.44039e-06	2.13925e-06	1.17e-06	0.116436	-8.25723	418	0.457388
sp|O35986|ZRAB2_RAT	Zinc finger Ran-binding domain-containing protein 2 OS=Rattus norvegicus OX=10116 GN=Zranb2 PE=1 SV=2	8.19666e-05	0.000329559	0.000355192	0.000157221	2.13925e-06	1.17e-06	0.117041	-2.25585	419	0.458667
sp|P58405|STRN3_RAT	Striatin-3 OS=Rattus norvegicus OX=10116 GN=Strn3 PE=1 SV=2	1.33575e-06	3.42426e-05	3.69059e-05	1.44039e-06	2.13925e-06	1.17e-06	0.119728	-3.93178	420	0.468079
sp|Q8VIP2|MLXPL_RAT	Carbohydrate-responsive element-binding protein OS=Rattus norvegicus OX=10116 GN=Mlxipl PE=1 SV=1	1.33575e-06	3.1432e-05	3.38767e-05	1.44039e-06	2.13925e-06	1.17e-06	0.120026	-3.81059	421	0.468129
sp|Q4V8K1|STEA4_RAT	Metalloreductase STEAP4 OS=Rattus norvegicus OX=10116 GN=Steap4 PE=1 SV=1	1.33575e-06	5.78482e-05	6.23475e-05	1.44039e-06	2.13925e-06	1.17e-06	0.118422	-4.67737	422	0.46078
sp|P46152|GATA4_RAT	Transcription factor GATA-4 OS=Rattus norvegicus OX=10116 GN=Gata4 PE=1 SV=1	1.33575e-06	6.17924e-05	6.65984e-05	1.44039e-06	2.13925e-06	1.17e-06	0.118305	-4.77151	423	0.459238
sp|F1LP64|TRIPC_RAT	E3 ubiquitin-protein ligase TRIP12 OS=Rattus norvegicus OX=10116 GN=Trip12 PE=1 SV=1	1.33575e-05	2.151e-06	1.44708e-05	1.44039e-06	2.13925e-06	1.17e-06	0.0999938	-2.65808	424	0.38724
sp|Q9WUC8|PLRG1_RAT	Pleiotropic regulator 1 OS=Rattus norvegicus OX=10116 GN=Plrg1 PE=2 SV=1	5.26244e-05	2.151e-06	5.70103e-05	1.44039e-06	2.13925e-06	1.17e-06	0.112622	-4.55677	425	0.435117
sp|Q5M951|CA174_RAT	UPF0688 protein C1orf174 homolog OS=Rattus norvegicus OX=10116 PE=2 SV=1	0.000121842	2.151e-06	0.000131997	1.44039e-06	2.13925e-06	1.17e-06	0.11498	-5.75213	426	0.443185
sp|Q5U216|DX39A_RAT	ATP-dependent RNA helicase DDX39A OS=Rattus norvegicus OX=10116 GN=Ddx39a PE=2 SV=1	6.33465e-05	2.151e-06	6.8626e-05	1.44039e-06	2.13925e-06	1.17e-06	0.113327	-4.8196	427	0.435792
sp|P47727|CBR1_RAT	Carbonyl reductase [NADPH] 1 OS=Rattus norvegicus OX=10116 GN=Cbr1 PE=1 SV=2	0.000292949	2.151e-06	0.000317364	1.44039e-06	2.13925e-06	1.17e-06	0.116017	-7.01066	428	0.445095
sp|P52164|MAX_RAT	Protein max OS=Rattus norvegicus OX=10116 GN=Max PE=1 SV=1	0.000338112	2.151e-06	0.000366291	1.44039e-06	2.13925e-06	1.17e-06	0.116116	-7.21684	429	0.444434
sp|P14841|CYTC_RAT	Cystatin-C OS=Rattus norvegicus OX=10116 GN=Cst3 PE=1 SV=2	0.000193207	2.151e-06	0.000209309	1.44039e-06	2.13925e-06	1.17e-06	0.115637	-6.41277	430	0.441571
sp|Q6AXU6|JUPI1_RAT	Jupiter microtubule associated homolog 1 OS=Rattus norvegicus OX=10116 GN=JPT1 PE=1 SV=3	0.000363073	2.151e-06	0.000393333	1.44039e-06	2.13925e-06	1.17e-06	0.11616	-7.3193	431	0.442539
sp|D3ZYR1|FCHO2_RAT	F-BAR domain only protein 2 OS=Rattus norvegicus OX=10116 GN=Fcho2 PE=1 SV=1	3.34351e-05	2.151e-06	3.62216e-05	1.44039e-06	2.13925e-06	1.17e-06	0.11021	-3.91825	432	0.4189
sp|P24329|THTR_RAT	Thiosulfate sulfurtransferase OS=Rattus norvegicus OX=10116 GN=Tst PE=1 SV=3	0.0017304	0.00137316	0.00147996	0.00131017	0.00137445	0.00114771	0.116837	-0.258235	433	0.443063
sp|P19488|UDB37_RAT	UDP-glucuronosyltransferase 2B37 OS=Rattus norvegicus OX=10116 GN=Ugt2b37 PE=2 SV=1	1.33575e-06	2.151e-06	1.44708e-06	0.000195784	2.13925e-06	0.000214384	0.115983	6.38487	434	0.438813
sp|P20812|CP2A3_RAT	Cytochrome P450 2A3 OS=Rattus norvegicus OX=10116 GN=Cyp2a3 PE=2 SV=1	1.33575e-06	2.151e-06	1.44708e-06	5.2513e-05	2.13925e-06	5.75019e-05	0.113353	4.50663	435	0.427875
sp|Q63639|AL1A2_RAT,sp|Q66HF8|AL1B1_RAT	Retinal dehydrogenase 2 OS=Rattus norvegicus OX=10116 GN=Aldh1a2 PE=1 SV=2,Aldehyde dehydrogenase X, mitochondrial OS=Rattus norvegicus OX=10116 GN=Aldh1b1 PE=1 SV=1	1.33575e-06	2.151e-06	1.44708e-06	5.008e-05	2.13925e-06	5.48377e-05	0.113177	4.43953	436	0.426229
sp|P33124|ACSL6_RAT	Long-chain-fatty-acid--CoA ligase 6 OS=Rattus norvegicus OX=10116 GN=Acsl6 PE=1 SV=1	1.33575e-06	2.151e-06	1.44708e-06	3.72187e-05	2.13925e-06	4.07546e-05	0.111852	4.02125	437	0.420278
sp|Q9WV78|PLVAP_RAT	Plasmalemma vesicle-associated protein OS=Rattus norvegicus OX=10116 GN=Plvap PE=1 SV=1	1.33575e-06	2.151e-06	1.44708e-06	0.000118454	2.13925e-06	0.000129707	0.115359	5.66481	438	0.432465
sp|D3ZD32|CHD5_RAT	Chromodomain-helicase-DNA-binding protein 5 OS=Rattus norvegicus OX=10116 GN=Chd5 PE=1 SV=1	1.33575e-06	2.151e-06	1.44708e-06	2.66339e-05	2.13925e-06	2.91642e-05	0.109777	3.55371	439	0.410602
sp|Q923W4|HDGR3_RAT	Hepatoma-derived growth factor-related protein 3 OS=Rattus norvegicus OX=10116 GN=Hdgfl3 PE=1 SV=1	1.33575e-06	2.151e-06	1.44708e-06	0.000128423	0.000144346	1.17e-06	0.118914	5.79501	440	0.443766
sp|P13601|AL1A7_RAT,sp|P51647|AL1A1_RAT	Aldehyde dehydrogenase, cytosolic 1 OS=Rattus norvegicus OX=10116 GN=Aldh1a7 PE=1 SV=2,Retinal dehydrogenase 1 OS=Rattus norvegicus OX=10116 GN=Aldh1a1 PE=1 SV=3	1.33575e-06	2.151e-06	1.44708e-06	0.000103559	0.000116399	1.17e-06	0.119269	5.48603	441	0.44408
sp|P21816|CDO1_RAT	Cysteine dioxygenase type 1 OS=Rattus norvegicus OX=10116 GN=Cdo1 PE=1 SV=1	1.33575e-06	2.151e-06	1.44708e-06	0.000259414	0.00029158	1.17e-06	0.118179	6.80625	442	0.439025
sp|O35826|GLCNE_RAT	Bifunctional UDP-N-acetylglucosamine 2-epimerase/N-acetylmannosamine kinase OS=Rattus norvegicus OX=10116 GN=Gne PE=1 SV=1	1.33575e-06	2.151e-06	1.44708e-06	3.59299e-05	4.0385e-05	1.17e-06	0.122886	3.97314	443	0.455482
sp|Q5RJZ6|SCOC_RAT	Short coiled-coil protein OS=Rattus norvegicus OX=10116 GN=Scoc PE=2 SV=1	1.33575e-06	2.151e-06	1.44708e-06	0.000212635	0.000239	1.17e-06	0.118336	6.52004	444	0.43763
sp|P36511|UDB15_RAT	UDP-glucuronosyltransferase 2B15 OS=Rattus norvegicus OX=10116 GN=Ugt2b15 PE=1 SV=1	1.33575e-06	2.151e-06	1.44708e-06	9.78922e-05	0.00011003	1.17e-06	0.119375	5.40529	445	0.440482
sp|P08430|UD16_RAT,sp|P20720|UD12_RAT,sp|Q62789|UD2B7_RAT,sp|Q64550|UD11_RAT,sp|Q64633|UD17_RAT,sp|Q64634|UD18_RAT,sp|Q64637|UD13_RAT,sp|Q64638|UD15_RAT	UDP-glucuronosyltransferase 1-6 OS=Rattus norvegicus OX=10116 GN=Ugt1a6 PE=1 SV=1,UDP-glucuronosyltransferase 1-2 OS=Rattus norvegicus OX=10116 GN=Ugt1a2 PE=2 SV=2,UDP-glucuronosyltransferase 2B7 OS=Rattus norvegicus OX=10116 GN=Ugt2b7 PE=2 SV=1,UDP-glucuronosyltransferase 1A1 OS=Rattus norvegicus OX=10116 GN=Ugt1a1 PE=1 SV=1,UDP-glucuronosyltransferase 1A7 OS=Rattus norvegicus OX=10116 GN=Ugt1a7…	1.33575e-06	2.151e-06	1.44708e-06	4.90386e-05	5.51191e-05	1.17e-06	0.121367	4.41603	446	0.446827
sp|P05714|RAB4A_RAT,sp|P35284|RAB12_RAT,sp|P51146|RAB4B_RAT,sp|P51156|RAB26_RAT,sp|P62824|RAB3C_RAT,sp|P63012|RAB3A_RAT,sp|Q53B90|RAB43_RAT,sp|Q63941|RAB3B_RAT,sp|Q9WVB1|RAB6A_RAT	Ras-related protein Rab-4A OS=Rattus norvegicus OX=10116 GN=Rab4a PE=1 SV=3,Ras-related protein Rab-12 OS=Rattus norvegicus OX=10116 GN=Rab12 PE=1 SV=2,Ras-related protein Rab-4B OS=Rattus norvegicus OX=10116 GN=Rab4b PE=2 SV=1,Ras-related protein Rab-26 OS=Rattus norvegicus OX=10116 GN=Rab26 PE=2 SV=2,Ras-related protein Rab-3C OS=Rattus norvegicus OX=10116 GN=Rab3c PE=1 SV=1,Ras-related protein…	1.33575e-06	2.151e-06	1.44708e-06	0.000118997	0.000133752	1.17e-06	0.119031	5.68552	447	0.437245
sp|P20759|IGHG1_RAT	Ig gamma-1 chain C region OS=Rattus norvegicus OX=10116 PE=1 SV=1	1.33575e-06	2.151e-06	1.44708e-06	0.00015915	0.000178883	1.17e-06	0.118631	6.1033	448	0.434805
sp|P0C546|S2542_RAT	Mitochondrial coenzyme A transporter SLC25A42 OS=Rattus norvegicus OX=10116 GN=Slc25a42 PE=2 SV=1	1.33575e-06	2.151e-06	1.44708e-06	8.15768e-05	9.16918e-05	1.17e-06	0.119768	5.14387	449	0.437992
sp|P63245|RACK1_RAT	Receptor of activated protein C kinase 1 OS=Rattus norvegicus OX=10116 GN=Rack1 PE=1 SV=3	0.000511968	0.000428843	0.000369758	0.000245502	0.000367924	0.000358435	0.118639	-0.431371	450	0.4329
sp|P41034|TTPA_RAT	Alpha-tocopherol transfer protein OS=Rattus norvegicus OX=10116 GN=Ttpa PE=1 SV=1	0.000389194	0.000293403	0.000316223	0.000186629	0.000314654	0.000204359	0.118932	-0.501285	451	0.433009
sp|B0K020|CISD1_RAT	CDGSH iron-sulfur domain-containing protein 1 OS=Rattus norvegicus OX=10116 GN=Cisd1 PE=3 SV=1	1.33575e-06	2.151e-06	1.44708e-06	0.000960793	0.000809944	1.17e-06	0.11922	8.48838	452	0.433096
sp|Q8VI04|ASGL1_RAT	Isoaspartyl peptidase/L-asparaginase OS=Rattus norvegicus OX=10116 GN=Asrgl1 PE=1 SV=1	0.000406141	0.00032659	1.44708e-06	1.44039e-06	2.13925e-06	1.17e-06	0.120974	-7.27217	453	0.438496
sp|P62425|RL7A_RAT	60S ribosomal protein L7a OS=Rattus norvegicus OX=10116 GN=Rpl7a PE=1 SV=2	0.00122025	0.00122656	0.00077114	0.000975241	0.000219233	0.000427157	0.121315	-0.988695	454	0.438766
sp|Q6IG01|K2C1B_RAT	Keratin, type II cytoskeletal 1b OS=Rattus norvegicus OX=10116 GN=Krt77 PE=3 SV=1	1.33575e-06	2.151e-06	1.44708e-06	0.000349884	2.13925e-06	0.00027366	0.121454	6.98658	455	0.438302
sp|Q99MS0|S14L2_RAT	SEC14-like protein 2 OS=Rattus norvegicus OX=10116 GN=Sec14l2 PE=1 SV=1	1.33575e-06	2.151e-06	1.44708e-06	1.44039e-06	0.000217057	0.000281945	0.123217	6.66435	456	0.443691
sp|Q5U4F3|F107B_RAT	Protein FAM107B OS=Rattus norvegicus OX=10116 GN=Fam107b PE=2 SV=1	0.000412961	0.000415094	0.000894757	1.44039e-06	0.00044516	1.17e-06	0.12314	-1.94393	457	0.442443
sp|O35165|GOSR2_RAT	Golgi SNAP receptor complex member 2 OS=Rattus norvegicus OX=10116 GN=Gosr2 PE=1 SV=2	1.33575e-06	2.151e-06	1.44708e-06	0.000367096	0.000275075	1.17e-06	0.124897	7.02673	458	0.447776
sp|Q62910|SYNJ1_RAT	Synaptojanin-1 OS=Rattus norvegicus OX=10116 GN=Synj1 PE=1 SV=3	1.33575e-06	6.90944e-05	9.30855e-05	1.44039e-06	2.13925e-06	1.17e-06	0.126354	-5.10547	459	0.45201
sp|Q9WUW9|S1C2A_RAT	Sulfotransferase 1C2A OS=Rattus norvegicus OX=10116 GN=Sult1c2a PE=2 SV=2	1.33575e-06	2.151e-06	1.44708e-06	0.0004382	0.00059104	1.17e-06	0.125239	7.7063	460	0.447048
sp|P09006|SPA3N_RAT	Serine protease inhibitor A3N OS=Rattus norvegicus OX=10116 GN=Serpina3n PE=1 SV=3	0.000194131	2.151e-06	1.44708e-06	0.000124122	0.000418536	0.000271827	0.125654	2.04236	461	0.447557
sp|P61959|SUMO2_RAT	Small ubiquitin-related modifier 2 OS=Rattus norvegicus OX=10116 GN=Sumo2 PE=1 SV=1	0.000284726	0.000286196	0.000308456	1.44039e-06	2.13925e-06	0.00029901	0.125122	-1.53912	462	0.444697
sp|P08025|IGF1_RAT	Insulin-like growth factor I OS=Rattus norvegicus OX=10116 GN=Igf1 PE=1 SV=3	0.000176791	0.000177704	0.000191525	1.44039e-06	2.13925e-06	0.00018566	0.12516	-1.52874	463	0.443873
sp|P55770|NH2L1_RAT	NHP2-like protein 1 OS=Rattus norvegicus OX=10116 GN=Snu13 PE=2 SV=4	0.00021132	0.000212411	0.000228932	1.44039e-06	2.13925e-06	0.000221921	0.125144	-1.53321	464	0.442857
sp|Q64060|DDX4_RAT	Probable ATP-dependent RNA helicase DDX4 OS=Rattus norvegicus OX=10116 GN=Ddx4 PE=1 SV=1	3.79368e-05	3.81327e-05	4.10986e-05	1.44039e-06	2.13925e-06	3.984e-05	0.125573	-1.43216	465	0.443422
sp|Q66H45|TTC36_RAT	Tetratricopeptide repeat protein 36 OS=Rattus norvegicus OX=10116 GN=Ttc36 PE=1 SV=1	0.00159967	0.00102323	0.000945268	0.00153417	0.00188116	0.0015272	0.125561	0.470067	466	0.442427
sp|B5DFC9|NID2_RAT	Nidogen-2 OS=Rattus norvegicus OX=10116 GN=Nid2 PE=2 SV=1	1.33575e-06	2.151e-06	1.44708e-06	5.5748e-05	2.13925e-06	4.06962e-05	0.122222	4.32057	467	0.429741
sp|P08542|UDB17_RAT	UDP-glucuronosyltransferase 2B17 OS=Rattus norvegicus OX=10116 GN=Ugt2b17 PE=1 SV=2	1.33575e-06	2.151e-06	1.44708e-06	0.000146838	2.13925e-06	0.000107192	0.124397	5.69825	468	0.436454
sp|Q2PQA9|KINH_RAT	Kinesin-1 heavy chain OS=Rattus norvegicus OX=10116 GN=Kif5b PE=1 SV=1	0.000168529	0.000254099	0.000182575	0.000215505	0.000363339	0.000324471	0.126276	0.577808	469	0.442102
sp|P62828|RAN_RAT,sp|Q8K586|RANT_RAT	GTP-binding nuclear protein Ran OS=Rattus norvegicus OX=10116 GN=Ran PE=1 SV=3,GTP-binding nuclear protein Ran, testis-specific isoform OS=Rattus norvegicus OX=10116 GN=Rasl2-9 PE=2 SV=1	0.00037568	2.151e-06	0.000271327	1.44039e-06	2.13925e-06	1.17e-06	0.125756	-7.09461	470	0.439343
sp|Q9R037|WDR44_RAT	WD repeat-containing protein 44 OS=Rattus norvegicus OX=10116 GN=Wdr44 PE=1 SV=1	8.93688e-05	2.151e-06	6.45447e-05	1.44039e-06	2.13925e-06	1.17e-06	0.123813	-5.03818	471	0.431636
sp|P85972|VINC_RAT	Vinculin OS=Rattus norvegicus OX=10116 GN=Vcl PE=1 SV=1	0.000888099	0.00114774	0.00112705	0.000900406	0.000902639	0.000879358	0.12803	-0.237716	472	0.445392
sp|P06760|BGLR_RAT	Beta-glucuronidase OS=Rattus norvegicus OX=10116 GN=Gusb PE=2 SV=1	1.33575e-06	0.000125873	0.000180885	1.44039e-06	2.13925e-06	1.17e-06	0.129667	-6.01941	473	0.450134
sp|O88267|ACOT1_RAT	Acyl-coenzyme A thioesterase 1 OS=Rattus norvegicus OX=10116 GN=Acot1 PE=1 SV=1	0.000451892	0.000259557	0.000139873	1.44039e-06	2.13925e-06	0.000203384	0.130194	-2.04033	474	0.451009
sp|Q62867|GGH_RAT	Gamma-glutamyl hydrolase OS=Rattus norvegicus OX=10116 GN=Ggh PE=1 SV=1	0.000170656	0.000171537	0.000277318	8.18341e-05	2.13925e-06	0.000179217	0.129057	-1.23502	475	0.44613
sp|P17178|CP27A_RAT	Sterol 26-hydroxylase, mitochondrial OS=Rattus norvegicus OX=10116 GN=Cyp27a1 PE=1 SV=1	1.33575e-06	2.151e-06	1.44708e-06	0.000146012	2.13925e-06	0.000213178	0.128978	6.19446	476	0.444921
sp|P07340|AT1B1_RAT	Sodium/potassium-transporting ATPase subunit beta-1 OS=Rattus norvegicus OX=10116 GN=Atp1b1 PE=1 SV=1	1.33575e-06	2.151e-06	1.44708e-06	1.44039e-06	0.000191829	0.000280322	0.130439	6.58479	477	0.449017
sp|P16446|PIPNA_RAT	Phosphatidylinositol transfer protein alpha isoform OS=Rattus norvegicus OX=10116 GN=Pitpna PE=1 SV=2	1.33575e-06	2.151e-06	1.44708e-06	1.44039e-06	0.000215188	0.000314457	0.13038	6.75009	478	0.447874
sp|P29457|SERPH_RAT	Serpin H1 OS=Rattus norvegicus OX=10116 GN=Serpinh1 PE=1 SV=1	0.000324328	0.000195602	0.000491902	6.22096e-05	2.13925e-06	0.000272479	0.130761	-1.58689	479	0.448245
sp|P31210|AK1D1_RAT	Aldo-keto reductase family 1 member D1 OS=Rattus norvegicus OX=10116 GN=Akr1d1 PE=1 SV=1	0.000663778	0.000834007	0.000539325	0.000954899	0.000804975	0.00139416	0.130801	0.630672	480	0.447447
sp|Q62839|GOGA2_RAT	Golgin subfamily A member 2 OS=Rattus norvegicus OX=10116 GN=Golga2 PE=1 SV=4	1.33575e-06	2.151e-06	1.44708e-06	0.000129967	8.76492e-05	1.17e-06	0.133173	5.47067	481	0.454614
sp|Q5PQJ6|P5CR3_RAT	Pyrroline-5-carboxylate reductase 3 OS=Rattus norvegicus OX=10116 GN=Pycr3 PE=2 SV=1	0.000592313	0.000595372	0.000320839	0.000473384	2.13925e-06	1.17e-06	0.131275	-1.66201	482	0.447205
sp|Q3ZAV8|EDC4_RAT	Enhancer of mRNA-decapping protein 4 OS=Rattus norvegicus OX=10116 GN=Edc4 PE=1 SV=1	5.76737e-05	3.86477e-05	1.44708e-06	1.44039e-06	2.13925e-06	1.17e-06	0.133655	-4.36348	483	0.454372
sp|Q8K3Y6|ZCCHV_RAT	Zinc finger CCCH-type antiviral protein 1 OS=Rattus norvegicus OX=10116 GN=Zc3hav1 PE=1 SV=1	0.000104571	7.00738e-05	1.44708e-06	1.44039e-06	2.13925e-06	1.17e-06	0.132609	-5.21236	484	0.449883
sp|O08623|SQSTM_RAT	Sequestosome-1 OS=Rattus norvegicus OX=10116 GN=Sqstm1 PE=1 SV=1	1.33575e-06	2.151e-06	1.44708e-06	0.000177276	0.000265676	1.17e-06	0.132809	6.49211	485	0.449635
sp|P00406|COX2_RAT	Cytochrome c oxidase subunit 2 OS=Rattus norvegicus OX=10116 GN=Mtco2 PE=1 SV=3	1.33575e-06	2.151e-06	1.44708e-06	0.000342838	0.000513797	1.17e-06	0.132276	7.4418	486	0.446908
sp|Q6PCU2|VATE1_RAT	V-type proton ATPase subunit E 1 OS=Rattus norvegicus OX=10116 GN=Atp6v1e1 PE=1 SV=1	0.000239371	0.000240607	0.000388982	0.000114785	0.000129018	0.00025138	0.131769	-0.81133	487	0.444282
sp|P17220|PSA2_RAT	Proteasome subunit alpha type-2 OS=Rattus norvegicus OX=10116 GN=Psma2 PE=1 SV=3	0.000231188	0.000348572	1.44708e-06	1.44039e-06	2.13925e-06	1.17e-06	0.132524	-6.93509	488	0.445912
sp|P28073|PSB6_RAT	Proteasome subunit beta type-6 OS=Rattus norvegicus OX=10116 GN=Psmb6 PE=1 SV=3	0.000227302	0.000342714	1.44708e-06	1.44039e-06	2.13925e-06	1.17e-06	0.132531	-6.9107	489	0.445021
sp|Q6P6Q2|K2C5_RAT	Keratin, type II cytoskeletal 5 OS=Rattus norvegicus OX=10116 GN=Krt5 PE=1 SV=1	1.33575e-06	2.151e-06	1.44708e-06	0.000225186	2.13925e-06	0.000147948	0.1321	6.24909	490	0.44267
sp|P22072|3BHS2_RAT,sp|P27364|3BHS5_RAT	3 beta-hydroxysteroid dehydrogenase/Delta 5--)4-isomerase type 2 OS=Rattus norvegicus OX=10116 GN=Hsd3b PE=2 SV=3,NADPH-dependent 3-keto-steroid reductase Hsd3b5 OS=Rattus norvegicus OX=10116 GN=Hsd3b5 PE=1 SV=3	1.33575e-06	2.151e-06	1.44708e-06	0.00034774	2.13925e-06	0.000228466	0.132373	6.87308	491	0.442681
sp|P02600|MYL1_RAT	Myosin light chain 1/3, skeletal muscle isoform OS=Rattus norvegicus OX=10116 GN=Myl1 PE=1 SV=2	0.000572465	0.000575421	0.00077522	0.000549025	0.000154275	0.000450888	0.133245	-0.73656	492	0.44469
sp|O88656|ARC1B_RAT	Actin-related protein 2/3 complex subunit 1B OS=Rattus norvegicus OX=10116 GN=Arpc1b PE=1 SV=3	0.000363561	0.000292351	0.000236317	0.000488145	0.000313527	0.00045816	0.133744	0.497745	493	0.445453
sp|Q925G1|HDGR2_RAT	Hepatoma-derived growth factor-related protein 2 OS=Rattus norvegicus OX=10116 GN=Hdgfl2 PE=1 SV=2	0.000161728	0.000365766	0.000219008	0.000116329	0.000174338	8.49206e-05	0.135039	-0.990998	494	0.448854
sp|Q63014|AKAP8_RAT	A-kinase anchor protein 8 OS=Rattus norvegicus OX=10116 GN=Akap8 PE=1 SV=1	7.87452e-05	0.000118728	0.000170616	7.55209e-05	8.4885e-05	4.13478e-05	0.135368	-0.86746	495	0.449038
sp|Q63639|AL1A2_RAT	Retinal dehydrogenase 2 OS=Rattus norvegicus OX=10116 GN=Aldh1a2 PE=1 SV=2	5.22181e-05	5.24877e-05	5.65701e-05	1.44039e-06	5.62895e-05	1.17e-06	0.136966	-1.45319	496	0.453425
sp|Q6IG01|K2C1B_RAT,sp|Q6P6Q2|K2C5_RAT	Keratin, type II cytoskeletal 1b OS=Rattus norvegicus OX=10116 GN=Krt77 PE=3 SV=1,Keratin, type II cytoskeletal 5 OS=Rattus norvegicus OX=10116 GN=Krt5 PE=1 SV=1	5.21175e-05	5.23866e-05	5.64611e-05	1.44039e-06	5.61811e-05	1.17e-06	0.136967	-1.45307	497	0.452516
sp|P69682|NECP1_RAT	Adaptin ear-binding coat-associated protein 1 OS=Rattus norvegicus OX=10116 GN=Necap1 PE=1 SV=1	1.33575e-06	0.000196308	0.000317364	1.44039e-06	2.13925e-06	1.17e-06	0.138374	-6.76063	498	0.456247
sp|P07323|ENOG_RAT,sp|P15429|ENOB_RAT	Gamma-enolase OS=Rattus norvegicus OX=10116 GN=Eno2 PE=1 SV=2,Beta-enolase OS=Rattus norvegicus OX=10116 GN=Eno3 PE=1 SV=3	1.33575e-06	2.151e-06	1.44708e-06	1.44039e-06	0.000201553	0.000327257	0.138671	6.74782	499	0.456308
sp|P37397|CNN3_RAT	Calponin-3 OS=Rattus norvegicus OX=10116 GN=Cnn3 PE=1 SV=1	0.000163933	2.151e-06	0.000266394	1.44039e-06	2.13925e-06	1.17e-06	0.137417	-6.50866	500	0.451277
sp|Q6AXM7|HBS1L_RAT	HBS1-like protein OS=Rattus norvegicus OX=10116 GN=Hbs1l PE=1 SV=1	7.96729e-05	8.00844e-05	0.000258939	3.82053e-05	2.13925e-06	4.1835e-05	0.139861	-2.34905	501	0.458388
sp|Q68G31|PBLD_RAT	Phenazine biosynthesis-like domain-containing protein OS=Rattus norvegicus OX=10116 GN=Pbld PE=2 SV=1	0.00037568	0.000472025	0.000305243	0.000270223	2.13925e-06	0.000295895	0.138808	-1.02071	502	0.45403
sp|Q9QYJ4|ABCB9_RAT	ATP-binding cassette sub-family B member 9 OS=Rattus norvegicus OX=10116 GN=Abcb9 PE=1 SV=1	0.000106492	7.13613e-05	0.000115367	6.80877e-05	2.13925e-06	7.45563e-05	0.138093	-1.01809	503	0.450791
sp|Q2HWF0|FBP1L_RAT	Formin-binding protein 1-like OS=Rattus norvegicus OX=10116 GN=Fnbp1l PE=1 SV=2	1.33575e-06	2.151e-06	1.44708e-06	8.57568e-05	0.000144585	1.17e-06	0.14379	5.55223	504	0.468458
sp|P20760|IGG2A_RAT	Ig gamma-2A chain C region OS=Rattus norvegicus OX=10116 GN=Igg-2a PE=1 SV=1	1.33575e-06	2.151e-06	1.44708e-06	0.000322254	0.000543316	1.17e-06	0.142016	7.45675	505	0.461762
sp|Q66HL2|SRC8_RAT	Src substrate cortactin OS=Rattus norvegicus OX=10116 GN=Cttn PE=1 SV=1	0.000425131	0.000480742	0.000575703	0.000356758	0.000458279	0.000223229	0.142249	-0.512957	506	0.461608
sp|B2RYF7|WASH1_RAT	WASH complex subunit 1 OS=Rattus norvegicus OX=10116 GN=Washc1 PE=2 SV=1	0.00011389	0.000228957	0.000246765	1.44039e-06	0.000184156	1.17e-06	0.143024	-1.65853	507	0.463207
sp|P62747|RHOB_RAT	Rho-related GTP-binding protein RhoB OS=Rattus norvegicus OX=10116 GN=Rhob PE=1 SV=1	0.000690025	0.000832305	0.000747533	0.000529417	0.000743826	0.000579713	0.144637	-0.292777	508	0.467508
sp|P85968|6PGD_RAT	6-phosphogluconate dehydrogenase, decarboxylating OS=Rattus norvegicus OX=10116 GN=Pgd PE=1 SV=1	0.000168006	0.000112582	6.06694e-05	5.3709e-05	6.03685e-05	5.88115e-05	0.145028	-0.981016	509	0.46785
sp|Q497B0|NIT2_RAT	Omega-amidase NIT2 OS=Rattus norvegicus OX=10116 GN=Nit2 PE=1 SV=1	0.00215608	0.00216721	0.00169874	0.00187981	0.00105645	0.0015438	0.14513	-0.426731	510	0.467263
sp|P20059|HEMO_RAT	Hemopexin OS=Rattus norvegicus OX=10116 GN=Hpx PE=1 SV=3	0.00111724	0.000886586	0.000382217	0.0010151	0.00133113	0.00135854	0.145231	0.634764	511	0.466671
sp|D3ZYW7|FRDA_RAT	Frataxin, mitochondrial OS=Rattus norvegicus OX=10116 GN=Fxn PE=1 SV=1	0.000390129	0.000522858	0.000140881	1.44039e-06	2.13925e-06	0.000273134	0.146272	-1.92923	512	0.4691
sp|Q4KLN7|ARFG3_RAT	ADP-ribosylation factor GTPase-activating protein 3 OS=Rattus norvegicus OX=10116 GN=Arfgap3 PE=1 SV=1	0.000154565	0.000207152	5.58158e-05	1.44039e-06	2.13925e-06	0.000108213	0.147219	-1.90106	513	0.471216
sp|P62738|ACTA_RAT,sp|P63269|ACTH_RAT,sp|P68035|ACTC_RAT,sp|P68136|ACTS_RAT	Actin, aortic smooth muscle OS=Rattus norvegicus OX=10116 GN=Acta2 PE=2 SV=1,Actin, gamma-enteric smooth muscle OS=Rattus norvegicus OX=10116 GN=Actg2 PE=2 SV=1,Actin, alpha cardiac muscle 1 OS=Rattus norvegicus OX=10116 GN=Actc1 PE=2 SV=1,Actin, alpha skeletal muscle OS=Rattus norvegicus OX=10116 GN=Acta1 PE=1 SV=1	0.00157845	0.00165872	0.00163228	0.00110096	0.00108279	0.00165764	0.145838	-0.342131	514	0.465889
sp|P15651|ACADS_RAT	Short-chain specific acyl-CoA dehydrogenase, mitochondrial OS=Rattus norvegicus OX=10116 GN=Acads PE=1 SV=2	0.00367656	0.00349757	0.00412522	0.00289637	0.00368013	0.00310259	0.145969	-0.223295	515	0.465399
sp|Q920P6|ADA_RAT	Adenosine deaminase OS=Rattus norvegicus OX=10116 GN=Ada PE=1 SV=3	1.33575e-06	2.151e-06	1.44708e-06	0.000147394	8.28352e-05	1.17e-06	0.148945	5.55154	516	0.473968
sp|P18163|ACSL1_RAT	Long-chain-fatty-acid--CoA ligase 1 OS=Rattus norvegicus OX=10116 GN=Acsl1 PE=1 SV=1	0.000425663	0.000350068	0.000251531	0.000705132	0.000375425	0.000528293	0.146459	0.647225	517	0.465156
sp|P02454|CO1A1_RAT	Collagen alpha-1(I) chain OS=Rattus norvegicus OX=10116 GN=Col1a1 PE=1 SV=5	0.000316471	0.000280681	0.000383182	0.000249952	0.000260877	0.000293248	0.147055	-0.285941	518	0.466148
sp|Q5BK20|JUPI2_RAT	Jupiter microtubule associated homolog 2 OS=Rattus norvegicus OX=10116 GN=Jpt2 PE=2 SV=1	0.000284726	0.000572392	0.00077114	0.000136534	2.13925e-06	0.000448515	0.14726	-1.47144	519	0.465896
sp|P02706|ASGR1_RAT	Asialoglycoprotein receptor 1 OS=Rattus norvegicus OX=10116 GN=Asgr1 PE=1 SV=2	9.52428e-05	2.151e-06	1.44708e-06	0.000182686	0.000513345	0.000100021	0.148481	3.00968	520	0.468857
sp|O35821|MBB1A_RAT	Myb-binding protein 1A OS=Rattus norvegicus OX=10116 GN=Mybbp1a PE=1 SV=2	6.03771e-05	2.151e-06	0.000109015	1.44039e-06	2.13925e-06	1.17e-06	0.146278	-5.17461	521	0.461015
sp|P10247|HG2A_RAT	H-2 class II histocompatibility antigen gamma chain OS=Rattus norvegicus OX=10116 GN=Cd74 PE=1 SV=2	1.33575e-06	2.151e-06	1.44708e-06	0.000185296	2.13925e-06	0.00010145	0.148294	5.87164	522	0.466473
sp|P62752|RL23A_RAT	60S ribosomal protein L23a OS=Rattus norvegicus OX=10116 GN=Rpl23a PE=2 SV=1	0.00225408	0.00174286	0.00206626	0.0018292	0.000934551	0.0016388	0.149065	-0.461738	523	0.468001
sp|D3ZHV2|MACF1_RAT	Microtubule-actin cross-linking factor 1 OS=Rattus norvegicus OX=10116 GN=Macf1 PE=1 SV=1	3.98511e-05	2.151e-06	2.15862e-05	1.44039e-06	2.13925e-06	1.17e-06	0.146031	-3.74287	524	0.4576
sp|P06536|GCR_RAT	Glucocorticoid receptor OS=Rattus norvegicus OX=10116 GN=Nr3c1 PE=1 SV=2	6.80477e-05	2.151e-06	3.68595e-05	1.44039e-06	2.13925e-06	1.17e-06	0.147661	-4.49443	525	0.461827
sp|P05426|RL7_RAT	60S ribosomal protein L7 OS=Rattus norvegicus OX=10116 GN=Rpl7 PE=1 SV=2	0.000208069	2.151e-06	0.000112705	1.44039e-06	2.13925e-06	1.17e-06	0.149239	-6.08724	526	0.465876
sp|P05369|FPPS_RAT	Farnesyl pyrophosphate synthase OS=Rattus norvegicus OX=10116 GN=Fdps PE=2 SV=2	1.33575e-06	0.000154043	8.30122e-05	1.44039e-06	2.13925e-06	1.17e-06	0.152287	-5.64937	527	0.474487
sp|Q9EQP5|PRELP_RAT	Prolargin OS=Rattus norvegicus OX=10116 GN=Prelp PE=2 SV=1	0.000573983	0.000649066	0.000466366	0.000688101	0.000696079	0.00113021	0.151481	0.573685	528	0.471083
sp|Q9WVJ4|SYJ2B_RAT	Synaptojanin-2-binding protein OS=Rattus norvegicus OX=10116 GN=Synj2bp PE=1 SV=2	1.33575e-06	2.151e-06	1.44708e-06	0.000536719	0.00100545	1.17e-06	0.151878	8.28913	529	0.471423
sp|Q562A2|ZFR_RAT	Zinc finger RNA-binding protein OS=Rattus norvegicus OX=10116 GN=Zfr PE=1 SV=2	1.33575e-06	2.151e-06	1.44708e-06	7.25296e-05	0.000135871	1.17e-06	0.154449	5.40859	530	0.478501
sp|Q62764|YBOX3_RAT	Y-box-binding protein 3 OS=Rattus norvegicus OX=10116 GN=Ybx3 PE=1 SV=1	0.000149856	0.000225944	0.00032469	7.18599e-05	0.00016154	0.000157374	0.152059	-0.842033	531	0.47021
sp|P26644|APOH_RAT	Beta-2-glycoprotein 1 OS=Rattus norvegicus OX=10116 GN=Apoh PE=2 SV=2	0.000910739	0.00064081	0.000887979	0.000960793	0.00098175	0.000956429	0.152385	0.24894	532	0.47033
sp|Q68FQ0|TCPE_RAT	T-complex protein 1 subunit epsilon OS=Rattus norvegicus OX=10116 GN=Cct5 PE=1 SV=1	0.000299988	0.000150769	0.000162495	0.000191804	2.13925e-06	1.17e-06	0.15424	-1.65217	533	0.475164
sp|P61206|ARF3_RAT	ADP-ribosylation factor 3 OS=Rattus norvegicus OX=10116 GN=Arf3 PE=2 SV=2	0.00164386	0.00165235	0.00226655	0.00171987	0.00128875	0.00109857	0.153812	-0.437648	534	0.472956
sp|P18421|PSB1_RAT	Proteasome subunit beta type-1 OS=Rattus norvegicus OX=10116 GN=Psmb1 PE=1 SV=3	0.000225408	0.000453144	0.000488388	0.000108089	2.13925e-06	0.000355074	0.15381	-1.32649	535	0.472066
sp|Q561R9|LACB2_RAT	Endoribonuclease LACTB2 OS=Rattus norvegicus OX=10116 GN=Lactb2 PE=2 SV=1	0.00178448	0.00151048	0.0021367	0.00225186	0.00202486	0.0021699	0.154503	0.247149	536	0.47331
sp|P48037|ANXA6_RAT	Annexin A6 OS=Rattus norvegicus OX=10116 GN=Anxa6 PE=1 SV=2	0.000120575	4.03992e-05	0.000130624	0.000154184	0.000129976	0.000168832	0.154728	0.635504	537	0.473117
sp|F1LQ48|HNRPL_RAT	Heterogeneous nuclear ribonucleoprotein L OS=Rattus norvegicus OX=10116 GN=Hnrnpl PE=1 SV=2	0.000651259	0.000567339	0.000611465	0.000582953	0.00056163	0.000547145	0.155302	-0.113396	538	0.47399
sp|Q9JKU6|STRBP_RAT	Spermatid perinuclear RNA-binding protein OS=Rattus norvegicus OX=10116 GN=Strbp PE=1 SV=1	1.33575e-06	2.151e-06	1.44708e-06	1.44039e-06	4.34545e-05	8.46675e-05	0.158871	4.7148	539	0.483982
sp|D2XV59|GTPB1_RAT	GTP-binding protein 1 OS=Rattus norvegicus OX=10116 GN=Gtpbp1 PE=1 SV=1	1.33575e-06	2.151e-06	1.44708e-06	1.44039e-06	4.35844e-05	8.49206e-05	0.158861	4.71905	540	0.483055
sp|P23514|COPB_RAT	Coatomer subunit beta OS=Rattus norvegicus OX=10116 GN=Copb1 PE=1 SV=1	1.33575e-06	2.151e-06	1.44708e-06	1.44039e-06	3.0596e-05	5.96137e-05	0.160351	4.21536	541	0.486686
sp|P62268|RS23_RAT	40S ribosomal protein S23 OS=Rattus norvegicus OX=10116 GN=Rps23 PE=1 SV=3	0.000945768	0.000570391	0.000819673	0.000725634	0.000407804	0.000397286	0.156725	-0.609722	542	0.4748
sp|P10634|CP2DQ_RAT	Cytochrome P450 2D26 OS=Rattus norvegicus OX=10116 GN=Cyp2d26 PE=1 SV=2	5.40979e-05	2.151e-06	1.44708e-06	0.000259414	0.000349896	1.17e-06	0.156918	3.4034	543	0.474511
sp|Q6AXR4|HEXB_RAT	Beta-hexosaminidase subunit beta OS=Rattus norvegicus OX=10116 GN=Hexb PE=2 SV=1	0.000201482	0.000303784	0.000327411	0.000289848	2.13925e-06	1.17e-06	0.157426	-1.50608	544	0.475172
sp|P24368|PPIB_RAT	Peptidyl-prolyl cis-trans isomerase B OS=Rattus norvegicus OX=10116 GN=Ppib PE=1 SV=3	0.00237931	0.00239159	0.0014923	0.00156129	0.00134991	0.00170962	0.157719	-0.438753	545	0.475181
sp|Q5RKI1|IF4A2_RAT	Eukaryotic initiation factor 4A-II OS=Rattus norvegicus OX=10116 GN=Eif4a2 PE=1 SV=1	0.000132919	6.68026e-05	1.44708e-06	1.44039e-06	2.13925e-06	1.17e-06	0.159602	-5.40444	546	0.479974
sp|Q9WUH4|FHL1_RAT	Four and a half LIM domains protein 1 OS=Rattus norvegicus OX=10116 GN=Fhl1 PE=2 SV=1	0.000193207	9.71023e-05	1.44708e-06	1.44039e-06	2.13925e-06	1.17e-06	0.159015	-5.9408	547	0.477334
sp|Q4FZT9|PSMD2_RAT	26S proteasome non-ATPase regulatory subunit 2 OS=Rattus norvegicus OX=10116 GN=Psmd2 PE=1 SV=1	0.000119158	5.98869e-05	1.44708e-06	1.44039e-06	2.13925e-06	1.17e-06	0.159821	-5.24798	548	0.47888
sp|Q6P7A9|LYAG_RAT	Lysosomal alpha-glucosidase OS=Rattus norvegicus OX=10116 GN=Gaa PE=2 SV=1	0.000113532	5.70591e-05	1.44708e-06	1.44039e-06	2.13925e-06	1.17e-06	0.159927	-5.17877	549	0.478324
sp|B0K036|SDHF1_RAT	Succinate dehydrogenase assembly factor 1, mitochondrial OS=Rattus norvegicus OX=10116 GN=Sdhaf1 PE=3 SV=1	0.000458457	0.000230412	1.44708e-06	1.44039e-06	2.13925e-06	1.17e-06	0.158279	-7.1833	550	0.472535
sp|P09495|TPM4_RAT	Tropomyosin alpha-4 chain OS=Rattus norvegicus OX=10116 GN=Tpm4 PE=1 SV=3	0.00218137	0.0024119	0.00224501	0.00188285	0.00176359	0.0022908	0.159012	-0.203841	551	0.473863
sp|P84076|HPCA_RAT	Neuron-specific calcium-binding protein hippocalcin OS=Rattus norvegicus OX=10116 GN=Hpca PE=1 SV=2	1.33575e-06	2.151e-06	1.44708e-06	1.44039e-06	0.000604311	0.000294362	0.161617	7.51125	552	0.480752
sp|Q8VID1|DHRS4_RAT	Dehydrogenase/reductase SDR family member 4 OS=Rattus norvegicus OX=10116 GN=Dhrs4 PE=2 SV=2	0.000387799	0.000389801	1.44708e-06	9.298e-05	2.13925e-06	1.17e-06	0.161385	-3.01626	553	0.479194
sp|P69736|EDF1_RAT	Endothelial differentiation-related factor 1 OS=Rattus norvegicus OX=10116 GN=Edf1 PE=1 SV=1	0.000731053	0.000734828	0.000791981	0.00070112	0.000197013	0.000575796	0.162426	-0.615291	554	0.481415
sp|P57113|MAAI_RAT	Maleylacetoacetate isomerase OS=Rattus norvegicus OX=10116 GN=Gstz1 PE=1 SV=2	0.0018784	0.00163635	0.00230628	0.00192159	0.00107993	0.00105207	0.163888	-0.522077	555	0.484873
sp|P97562|ACOX2_RAT	Peroxisomal acyl-coenzyme A oxidase 2 OS=Rattus norvegicus OX=10116 GN=Acox2 PE=1 SV=1	0.000238317	0.000319397	0.000258179	0.000152373	0.000256899	0.00020856	0.164282	-0.401165	556	0.485164
sp|Q5XI95|ADH6_RAT	Alcohol dehydrogenase 6 OS=Rattus norvegicus OX=10116 GN=Adh6 PE=2 SV=1	7.19387e-05	2.151e-06	0.000155869	0.000275973	7.75478e-05	0.000377738	0.165741	1.66901	557	0.488594
sp|B1H267|SNX5_RAT	Sorting nexin-5 OS=Rattus norvegicus OX=10116 GN=Snx5 PE=1 SV=1	0.000401717	0.000201896	0.000290132	1.44039e-06	0.00021652	0.000210935	0.165234	-1.05924	558	0.486226
sp|O35796|C1QBP_RAT	Complement component 1 Q subcomponent-binding protein, mitochondrial OS=Rattus norvegicus OX=10116 GN=C1qbp PE=1 SV=2	0.00106645	0.00126685	0.000630179	0.00065086	0.000731562	0.00061088	0.166146	-0.572131	559	0.488036
sp|O70143|SHC3_RAT	SHC-transforming protein 3 OS=Rattus norvegicus OX=10116 GN=Shc3 PE=2 SV=1	1.33575e-06	4.57721e-05	9.86643e-05	1.44039e-06	2.13925e-06	1.17e-06	0.170062	-4.93975	560	0.498647
sp|P17256|KIME_RAT	Mevalonate kinase OS=Rattus norvegicus OX=10116 GN=Mvk PE=1 SV=1	1.33575e-06	6.8832e-05	0.000148371	1.44039e-06	2.13925e-06	1.17e-06	0.168844	-5.52393	561	0.494193
sp|Q9QZ86|NOP58_RAT	Nucleolar protein 58 OS=Rattus norvegicus OX=10116 GN=Nop58 PE=1 SV=1	1.33575e-06	5.09151e-05	0.00010975	1.44039e-06	2.13925e-06	1.17e-06	0.169692	-5.09204	562	0.495792
sp|Q2KJ09|UBP16_RAT	Ubiquitin carboxyl-terminal hydrolase 16 OS=Rattus norvegicus OX=10116 GN=Usp16 PE=1 SV=2	1.33575e-06	6.58321e-05	0.000141905	1.44039e-06	2.13925e-06	1.17e-06	0.168953	-5.46004	563	0.492755
sp|P0C2B9|RM42_RAT	28S ribosomal protein L42, mitochondrial OS=Rattus norvegicus OX=10116 GN=Mrpl42 PE=1 SV=1	1.33575e-06	0.000192827	0.00041565	1.44039e-06	2.13925e-06	1.17e-06	0.167327	-7.0044	564	0.487148
sp|Q9EPJ0|NUCKS_RAT	Nuclear ubiquitous casein and cyclin-dependent kinase substrate 1 OS=Rattus norvegicus OX=10116 GN=Nucks1 PE=1 SV=1	0.000779188	0.00134265	0.00144708	0.000640529	0.000959934	0.000818278	0.16661	-0.561229	565	0.4842
sp|P84083|ARF5_RAT	ADP-ribosylation factor 5 OS=Rattus norvegicus OX=10116 GN=Arf5 PE=1 SV=2	0.0010519	0.00120838	0.00113957	0.000864714	0.00113392	0.000631243	0.166853	-0.37048	566	0.484049
sp|Q7TPB1|TCPD_RAT	T-complex protein 1 subunit delta OS=Rattus norvegicus OX=10116 GN=Cct4 PE=2 SV=3	0.000401469	0.000252214	0.000108732	9.62576e-05	5.40964e-05	0.000158104	0.16706	-1.3055	567	0.483795
sp|P62994|GRB2_RAT	Growth factor receptor-bound protein 2 OS=Rattus norvegicus OX=10116 GN=Grb2 PE=1 SV=1	0.000872547	0.00100235	0.00081023	0.00191273	0.00134369	0.00091632	0.167065	0.636006	568	0.482958
sp|P37996|ARL3_RAT	ADP-ribosylation factor-like protein 3 OS=Rattus norvegicus OX=10116 GN=Arl3 PE=1 SV=2	0.000297241	2.151e-06	0.000644029	1.44039e-06	2.13925e-06	1.17e-06	0.16692	-7.63394	569	0.481692
sp|P48508|GSH0_RAT	Glutamate--cysteine ligase regulatory subunit OS=Rattus norvegicus OX=10116 GN=Gclm PE=1 SV=1	0.000394875	0.000396914	1.44708e-06	1.44039e-06	2.13925e-06	0.000103671	0.167501	-2.88676	570	0.482521
sp|B2GV38|UBL4A_RAT	Ubiquitin-like protein 4A OS=Rattus norvegicus OX=10116 GN=Ubl4a PE=2 SV=1	1.33575e-06	2.151e-06	1.44708e-06	0.000165232	2.13925e-06	0.000361859	0.168146	6.74504	571	0.483529
sp|P84092|AP2M1_RAT	AP-2 complex subunit mu OS=Rattus norvegicus OX=10116 GN=Ap2m1 PE=1 SV=1	1.33575e-06	2.151e-06	1.44708e-06	5.96355e-05	2.13925e-06	0.000130602	0.167914	5.28508	572	0.482018
sp|P14562|LAMP1_RAT	Lysosome-associated membrane glycoprotein 1 OS=Rattus norvegicus OX=10116 GN=Lamp1 PE=1 SV=1	0.000199378	0.000200408	0.000287993	0.000254953	0.000286565	0.000348967	0.169053	0.372646	573	0.484441
sp|Q5BJN5|MIA40_RAT	Mitochondrial intermembrane space import and assembly protein 40 OS=Rattus norvegicus OX=10116 GN=Chchd4 PE=2 SV=1	0.000778387	0.00117361	0.00105408	0.000746516	0.000839079	0.000817437	0.170093	-0.323025	574	0.486574
sp|Q1JU68|EIF3A_RAT	Eukaryotic translation initiation factor 3 subunit A OS=Rattus norvegicus OX=10116 GN=Eif3a PE=2 SV=2	0.00033961	0.000321284	0.000259704	0.000268227	0.000279951	0.000230772	0.171205	-0.24104	575	0.488902
sp|G3V9A7|MTFR1_RAT	Mitochondrial fission regulator 1 OS=Rattus norvegicus OX=10116 GN=Mtfr1 PE=2 SV=1	1.33575e-06	2.151e-06	1.44708e-06	7.74371e-05	0.000174078	1.17e-06	0.174149	5.67849	576	0.496446
sp|Q68FT1|COQ9_RAT	Ubiquinone biosynthesis protein COQ9, mitochondrial OS=Rattus norvegicus OX=10116 GN=Coq9 PE=1 SV=2	1.33575e-06	2.151e-06	1.44708e-06	8.31456e-05	0.00018691	1.17e-06	0.173946	5.78064	577	0.495009
sp|Q5FVM4|NONO_RAT	Non-POU domain-containing octamer-binding protein OS=Rattus norvegicus OX=10116 GN=Nono PE=1 SV=3	0.000284128	0.00057119	0.000430931	0.000326993	0.000306281	0.000179029	0.171337	-0.66308	578	0.486739
sp|P14408|FUMH_RAT	Fumarate hydratase, mitochondrial OS=Rattus norvegicus OX=10116 GN=Fh PE=1 SV=2	0.000906967	0.00117978	0.00104035	0.000818664	0.000632619	0.00100849	0.172448	-0.346299	579	0.489051
sp|Q5XIU5|PSMF1_RAT	Proteasome inhibitor PI31 subunit OS=Rattus norvegicus OX=10116 GN=Psmf1 PE=1 SV=1	0.000399247	0.000300981	0.000324391	0.000287174	0.000215188	0.000314457	0.173578	-0.326998	580	0.491405
sp|Q6TUG0|DJB11_RAT	DnaJ homolog subfamily B member 11 OS=Rattus norvegicus OX=10116 GN=Dnajb11 PE=2 SV=1	0.000226667	2.151e-06	1.44708e-06	0.000217386	0.000244341	0.000158692	0.175518	1.42995	581	0.496043
sp|Q01205|ODO2_RAT	Dihydrolipoyllysine-residue succinyltransferase component of 2-oxoglutarate dehydrogenase complex, mitochondrial OS=Rattus norvegicus OX=10116 GN=Dlst PE=1 SV=2	0.00113201	0.0013774	0.00129089	0.00102851	0.000963369	0.00125136	0.175646	-0.228674	582	0.49555
sp|Q9JIX3|FHIT_RAT	Bis(5'-adenosyl)-triphosphatase OS=Rattus norvegicus OX=10116 GN=Fhit PE=1 SV=1	0.00144261	0.0012688	0.00117213	0.0012106	0.00116632	0.000946864	0.175906	-0.224548	583	0.495433
sp|Q562C9|MTND_RAT	1,2-dihydroxy-3-keto-5-methylthiopentene dioxygenase OS=Rattus norvegicus OX=10116 GN=Adi1 PE=2 SV=1	0.000604446	0.000455676	0.000654822	0.000434772	2.13925e-06	0.000476077	0.176202	-0.909492	584	0.495418
sp|Q924S5|LONM_RAT	Lon protease homolog, mitochondrial OS=Rattus norvegicus OX=10116 GN=Lonp1 PE=2 SV=1	0.000199308	0.000143098	3.08456e-05	0.000163841	0.000245541	0.000239208	0.176837	0.797156	585	0.496351
sp|Q9WTV5|PSMD9_RAT	26S proteasome non-ATPase regulatory subunit 9 OS=Rattus norvegicus OX=10116 GN=Psmd9 PE=1 SV=1	0.000731053	0.00159213	0.00105597	0.00128539	0.00170745	0.00191932	0.177499	0.539693	586	0.497361
sp|D3ZFD0|MY18A_RAT	Unconventional myosin-XVIIIa OS=Rattus norvegicus OX=10116 GN=Myo18a PE=1 SV=2	0.000224967	0.000186224	0.000215044	0.000164989	0.000142652	0.000208458	0.178781	-0.279053	587	0.5001
sp|Q07071|GCKR_RAT	Glucokinase regulatory protein OS=Rattus norvegicus OX=10116 GN=Gckr PE=1 SV=3	0.000215701	0.000216815	0.000514093	0.000206869	9.30079e-05	0.000135914	0.179158	-1.11913	588	0.500303
sp|P34064|PSA5_RAT	Proteasome subunit alpha type-5 OS=Rattus norvegicus OX=10116 GN=Psma5 PE=1 SV=1	0.000897891	0.00101534	0.00012159	1.44039e-06	2.13925e-06	0.000471468	0.180766	-2.09876	589	0.503935
sp|P13086|SUCA_RAT	Succinate--CoA ligase [ADP/GDP-forming] subunit alpha, mitochondrial OS=Rattus norvegicus OX=10116 GN=Suclg1 PE=2 SV=2	0.00101629	0.000785799	0.000592841	0.000599802	0.00050563	0.000656785	0.180293	-0.442593	590	0.501764
sp|O88900|GRB14_RAT	Growth factor receptor-bound protein 14 OS=Rattus norvegicus OX=10116 GN=Grb14 PE=1 SV=1	0.000150831	0.000202146	1.44708e-06	4.82183e-05	2.13925e-06	1.17e-06	0.179681	-2.78206	591	0.499216
sp|P41562|IDHC_RAT	Isocitrate dehydrogenase [NADP] cytoplasmic OS=Rattus norvegicus OX=10116 GN=Idh1 PE=1 SV=1	0.00143738	0.00131346	0.00106171	0.00106523	0.00035215	0.00109781	0.180911	-0.600092	592	0.501784
sp|O35828|CORO7_RAT	Coronin-7 OS=Rattus norvegicus OX=10116 GN=Coro7 PE=1 SV=2	1.33575e-06	0.000176933	0.000158912	2.8136e-05	2.13925e-06	3.0809e-05	0.17877	-2.46464	593	0.495008
sp|Q66H76|PAXI_RAT	Paxillin OS=Rattus norvegicus OX=10116 GN=Pxn PE=1 SV=1	1.33575e-06	0.000324779	0.000500056	1.44039e-06	9.95153e-05	1.17e-06	0.182196	-3.01609	594	0.503646
sp|P51650|SSDH_RAT	Succinate-semialdehyde dehydrogenase, mitochondrial OS=Rattus norvegicus OX=10116 GN=Aldh5a1 PE=1 SV=2	0.000413751	0.00025993	0.000280146	1.44039e-06	0.000111503	0.000325881	0.1832	-1.12009	595	0.505571
sp|Q5XII9|MFR1L_RAT	Mitochondrial fission regulator 1-like OS=Rattus norvegicus OX=10116 GN=Mtfr1l PE=1 SV=1	0.000467975	0.000470392	0.000304187	0.000269288	0.000201785	0.000393162	0.183549	-0.523812	596	0.505682
sp|Q6AXS5|PAIRB_RAT	Plasminogen activator inhibitor 1 RNA-binding protein OS=Rattus norvegicus OX=10116 GN=Serbp1 PE=1 SV=2	0.00099689	0.00120245	0.00179996	0.000573643	0.00107462	0.000977108	0.183988	-0.607224	597	0.506044
sp|Q03626|MUG1_RAT	Murinoglobulin-1 OS=Rattus norvegicus OX=10116 GN=Mug1 PE=2 SV=1	0.000218283	0.000237695	0.000137944	0.000261682	0.000235303	0.000248337	0.184046	0.327589	598	0.505356
sp|Q4FZX7|SRPRB_RAT	Signal recognition particle receptor subunit beta OS=Rattus norvegicus OX=10116 GN=Srprb PE=2 SV=1	0.000301661	0.000303219	0.000326803	0.000192873	0.000325182	0.000211197	0.184905	-0.353423	599	0.506869
sp|Q5XI78|ODO1_RAT	2-oxoglutarate dehydrogenase, mitochondrial OS=Rattus norvegicus OX=10116 GN=Ogdh PE=1 SV=1	0.000370172	0.000318928	0.000401023	0.000228224	0.000370532	0.000249906	0.185	-0.36123	600	0.506284
sp|P55797|APOC4_RAT	Apolipoprotein C-IV OS=Rattus norvegicus OX=10116 GN=Apoc4 PE=2 SV=2	0.000436274	2.151e-06	1.44708e-06	0.000627615	0.000235145	0.00045816	0.185875	1.58639	601	0.507832
sp|Q9Z1P2|ACTN1_RAT	Alpha-actinin-1 OS=Rattus norvegicus OX=10116 GN=Actn1 PE=1 SV=1	0.000181944	0.000152403	0.000164256	0.000174494	9.8065e-05	9.55357e-05	0.186177	-0.437814	602	0.507813
sp|Q9EPH2|MRP_RAT	MARCKS-related protein OS=Rattus norvegicus OX=10116 GN=Marcksl1 PE=2 SV=3	0.000543698	0.000546505	0.00117802	0.000391077	0.000439568	0.00042823	0.186839	-0.84943	603	0.508773
sp|Q5BJY9|K1C18_RAT	Keratin, type I cytoskeletal 18 OS=Rattus norvegicus OX=10116 GN=Krt18 PE=1 SV=3	0.00319728	0.00353517	0.00318665	0.00331167	0.0037223	0.00409636	0.186948	0.166217	604	0.508227
sp|P25235|RPN2_RAT	Dolichyl-diphosphooligosaccharide--protein glycosyltransferase subunit 2 OS=Rattus norvegicus OX=10116 GN=Rpn2 PE=2 SV=2	1.33575e-06	8.61764e-05	1.44708e-06	0.000123335	9.24183e-05	4.50173e-05	0.189734	1.55157	605	0.514947
sp|P31977|EZRI_RAT	Ezrin OS=Rattus norvegicus OX=10116 GN=Ezr PE=1 SV=3	0.000415428	0.000185588	0.000250028	0.000177075	0.000149273	0.000193897	0.188683	-0.710043	606	0.511249
sp|Q794E4|HNRPF_RAT	Heterogeneous nuclear ribonucleoprotein F OS=Rattus norvegicus OX=10116 GN=Hnrnpf PE=1 SV=3	0.00117321	0.0013103	0.00127099	0.00112517	0.000632342	0.00116362	0.189294	-0.362091	607	0.51206
sp|Q9JKC9|SYNRG_RAT	Synergin gamma OS=Rattus norvegicus OX=10116 GN=Synrg PE=1 SV=3	1.33575e-06	6.13739e-05	8.81965e-05	1.44039e-06	2.13925e-06	2.13739e-05	0.188245	-2.59633	608	0.508385
sp|P47819|GFAP_RAT	Glial fibrillary acidic protein OS=Rattus norvegicus OX=10116 GN=Gfap PE=1 SV=2	1.33575e-06	2.151e-06	1.44708e-06	6.03289e-05	6.78093e-05	0.000396362	0.193027	6.73209	609	0.520443
sp|Q5XI07|LPP_RAT	Lipoma-preferred partner homolog OS=Rattus norvegicus OX=10116 GN=Lpp PE=1 SV=1	0.000556387	0.0006453	0.000510026	0.000164186	0.000599769	0.000314623	0.189737	-0.666311	610	0.510735
sp|B0BNN3|CAH1_RAT	Carbonic anhydrase 1 OS=Rattus norvegicus OX=10116 GN=Ca1 PE=1 SV=1	0.000310908	0.000104171	0.00033682	0.000298177	0.000782015	0.00043534	0.190557	1.01122	611	0.512102
sp|P97536|CAND1_RAT	Cullin-associated NEDD8-dissociated protein 1 OS=Rattus norvegicus OX=10116 GN=Cand1 PE=1 SV=1	6.59731e-05	0.000110523	4.76476e-05	4.21812e-05	4.74114e-05	4.61885e-05	0.191038	-0.723142	612	0.512556
sp|Q99068|AMRP_RAT	Alpha-2-macroglobulin receptor-associated protein OS=Rattus norvegicus OX=10116 GN=Lrpap1 PE=1 SV=2	0.00127731	0.00143496	0.00113957	0.00129707	0.00194387	0.00157811	0.192234	0.323199	613	0.514923
sp|Q63028|ADDA_RAT	Alpha-adducin OS=Rattus norvegicus OX=10116 GN=Add1 PE=1 SV=2	1.33575e-06	7.39827e-05	0.000199342	1.44039e-06	2.13925e-06	1.17e-06	0.194753	-5.85369	614	0.52082
sp|P70550|RAB8B_RAT	Ras-related protein Rab-8B OS=Rattus norvegicus OX=10116 GN=Rab8b PE=1 SV=1	0.000392014	0.000394038	0.000424686	0.000877246	0.000422579	0.000548907	0.192698	0.61065	615	0.514487
sp|Q0VGK3|GLCTK_RAT	Glycerate kinase OS=Rattus norvegicus OX=10116 GN=Glyctk PE=1 SV=1	0.000568907	0.000207944	0.000504263	1.44039e-06	0.000167254	0.000380194	0.192942	-1.22281	616	0.514302
sp|P09606|GLNA_RAT	Glutamine synthetase OS=Rattus norvegicus OX=10116 GN=Glul PE=1 SV=3	0.000435104	0.000583134	0.00070705	0.000765029	0.000625372	0.000761553	0.193388	0.31881	617	0.514656
sp|P13668|STMN1_RAT	Stathmin OS=Rattus norvegicus OX=10116 GN=Stmn1 PE=1 SV=2	0.000726147	0.000547422	0.000983332	0.000174104	0.000782765	0.000190644	0.193421	-0.975834	618	0.51391
sp|Q9WV97|TIM9_RAT	Mitochondrial import inner membrane translocase subunit Tim9 OS=Rattus norvegicus OX=10116 GN=Timm9 PE=1 SV=3	0.00121568	0.000916471	0.00164625	0.00145738	0.00163809	0.00255334	0.194014	0.58017	619	0.514655
sp|Q5XHY7|STAM2_RAT	Signal transducing adapter molecule 2 OS=Rattus norvegicus OX=10116 GN=Stam2 PE=2 SV=1	1.33575e-06	2.151e-06	1.44708e-06	0.000148804	2.13925e-06	5.43135e-05	0.194762	5.37858	620	0.515805
sp|P62836|RAP1A_RAT	Ras-related protein Rap-1A OS=Rattus norvegicus OX=10116 GN=Rap1a PE=1 SV=1	0.000882031	0.00132988	0.00175183	0.00155085	0.00221854	0.00169818	0.1952	0.464038	621	0.516132
sp|P28064|PSB8_RAT	Proteasome subunit beta type-8 OS=Rattus norvegicus OX=10116 GN=Psmb8 PE=1 SV=3	1.33575e-06	0.000295529	0.000106171	1.44039e-06	2.13925e-06	1.17e-06	0.197892	-6.40695	622	0.522408
sp|Q5XI32|CAPZB_RAT	F-actin-capping protein subunit beta OS=Rattus norvegicus OX=10116 GN=Capzb PE=1 SV=1	0.000397779	0.000399833	0.000215465	0.000190746	2.13925e-06	0.000313301	0.196706	-1.00101	623	0.518446
sp|P16303|EST1D_RAT	Carboxylesterase 1D OS=Rattus norvegicus OX=10116 GN=Ces1d PE=1 SV=2	0.0016756	0.00125116	0.00165966	0.00174473	0.00165143	0.00216187	0.197136	0.277206	624	0.518746
sp|P63174|RL38_RAT	60S ribosomal protein L38 OS=Rattus norvegicus OX=10116 GN=Rpl38 PE=1 SV=2	0.00425055	0.0042725	0.00502342	1.44039e-06	0.0029158	0.00446379	0.197881	-0.876024	625	0.519873
sp|Q5M9G1|HEXI1_RAT	Protein HEXIM1 OS=Rattus norvegicus OX=10116 GN=Hexim1 PE=1 SV=1	7.59802e-05	0.000229118	0.000329251	7.28692e-05	2.13925e-06	0.000159584	0.198628	-1.43512	626	0.521003
sp|P48721|GRP75_RAT	Stress-70 protein, mitochondrial OS=Rattus norvegicus OX=10116 GN=Hspa9 PE=1 SV=3	0.00334626	0.00288304	0.00323674	0.00309463	0.00249067	0.00284478	0.198245	-0.167216	627	0.519168
sp|P23785|GRN_RAT	Progranulin OS=Rattus norvegicus OX=10116 GN=Grn PE=1 SV=3	0.000230008	0.000231196	0.000548191	0.000176472	0.000148765	0.000193238	0.199743	-0.961144	628	0.522257
sp|Q9QYU4|CRYM_RAT	Ketimine reductase mu-crystallin OS=Rattus norvegicus OX=10116 GN=Crym PE=1 SV=1	1.33575e-06	2.151e-06	9.36208e-05	0.00049728	2.13925e-06	0.000272261	0.199294	2.99035	629	0.520254
sp|P04638|APOA2_RAT	Apolipoprotein A-II OS=Rattus norvegicus OX=10116 GN=Apoa2 PE=2 SV=1	0.00106074	0.000799666	0.000861862	0.000762983	0.000857588	0.000556979	0.200634	-0.322105	630	0.522923
sp|Q07205|IF5_RAT	Eukaryotic translation initiation factor 5 OS=Rattus norvegicus OX=10116 GN=Eif5 PE=1 SV=1	0.000189154	0.000253507	0.000273224	0.000241878	2.13925e-06	0.000132429	0.199998	-0.927285	631	0.520438
sp|O35814|STIP1_RAT	Stress-induced-phosphoprotein 1 OS=Rattus norvegicus OX=10116 GN=Stip1 PE=1 SV=1	0.00149442	0.00130185	0.00134914	0.00138545	0.00118135	0.00115089	0.202763	-0.157106	632	0.526799
sp|Q920A6|RISC_RAT	Retinoid-inducible serine carboxypeptidase OS=Rattus norvegicus OX=10116 GN=Scpep1 PE=2 SV=1	0.000179529	0.000180456	0.000194491	0.000114785	2.13925e-06	0.000188535	0.201833	-0.860142	633	0.523555
sp|P50878|RL4_RAT	60S ribosomal protein L4 OS=Rattus norvegicus OX=10116 GN=Rpl4 PE=1 SV=3	0.00089949	0.000839554	0.000556832	0.000492949	0.000207777	0.000742198	0.203203	-0.670051	634	0.526276
sp|Q62736|CALD1_RAT	Non-muscle caldesmon OS=Rattus norvegicus OX=10116 GN=Cald1 PE=1 SV=1	0.00122255	0.00112646	0.0011037	0.000732809	0.000658937	0.00123039	0.20506	-0.396989	635	0.53025
sp|P21575|DYN1_RAT	Dynamin-1 OS=Rattus norvegicus OX=10116 GN=Dnm1 PE=1 SV=2	3.13067e-05	9.4405e-05	1.44708e-06	1.44039e-06	2.13925e-06	1.17e-06	0.210708	-4.74267	636	0.543998
sp|O35964|SH3G1_RAT	Endophilin-A2 OS=Rattus norvegicus OX=10116 GN=Sh3gl1 PE=1 SV=1	0.000147005	0.000443293	1.44708e-06	1.44039e-06	2.13925e-06	1.17e-06	0.206748	-6.96101	637	0.532936
sp|P62898|CYC_RAT	Cytochrome c, somatic OS=Rattus norvegicus OX=10116 GN=Cycs PE=1 SV=2	0.00334892	0.00621455	0.00613974	0.00420004	0.00361004	0.00351693	0.205895	-0.471293	638	0.529906
sp|P13444|METK1_RAT	S-adenosylmethionine synthase isoform type-1 OS=Rattus norvegicus OX=10116 GN=Mat1a PE=1 SV=2	0.000885734	0.000821823	0.000885742	0.00124153	0.000807904	0.00114482	0.206876	0.300691	639	0.531598
sp|P07824|ARGI1_RAT	Arginase-1 OS=Rattus norvegicus OX=10116 GN=Arg1 PE=1 SV=2	0.00385217	0.00361954	0.00390106	0.00433696	0.00370117	0.00448515	0.208	0.139027	640	0.533649
sp|Q641Z6|EHD1_RAT	EH domain-containing protein 1 OS=Rattus norvegicus OX=10116 GN=Ehd1 PE=1 SV=1	0.000506535	0.000661896	0.000658501	0.000825851	0.000982853	0.000585141	0.209498	0.389907	641	0.536656
sp|P07323|ENOG_RAT	Gamma-enolase OS=Rattus norvegicus OX=10116 GN=Eno2 PE=1 SV=2	0.000373949	0.00037588	0.000202557	0.000358637	2.13925e-06	1.17e-06	0.210612	-1.39577	642	0.538669
sp|O08837|CDC5L_RAT	Cell division cycle 5-like protein OS=Rattus norvegicus OX=10116 GN=Cdc5l PE=1 SV=2	0.000134908	0.000237307	0.000292302	9.70377e-05	0.00021814	1.17e-06	0.210491	-1.0708	643	0.537521
sp|Q9QWN8|SPTN2_RAT	Spectrin beta chain, non-erythrocytic 2 OS=Rattus norvegicus OX=10116 GN=Sptbn2 PE=1 SV=2	0.000328484	0.000227711	0.000184066	0.000206402	0.000183153	0.000142743	0.211336	-0.475799	644	0.538841
sp|M0RC99|RAB5A_RAT	Ras-related protein Rab-5A OS=Rattus norvegicus OX=10116 GN=Rab5a PE=2 SV=1	0.00100647	0.00101167	0.000817767	0.000965262	0.00108495	0.00118909	0.212882	0.191869	645	0.541941
sp|Q920F5|DCMC_RAT	Malonyl-CoA decarboxylase, mitochondrial OS=Rattus norvegicus OX=10116 GN=Mlycd PE=1 SV=1	5.49776e-05	2.151e-06	0.000178679	1.44039e-06	2.13925e-06	1.17e-06	0.214914	-5.63365	646	0.546268
sp|P18298|METK2_RAT	S-adenosylmethionine synthase isoform type-2 OS=Rattus norvegicus OX=10116 GN=Mat2a PE=1 SV=1	6.84784e-05	0.000137664	0.000148371	0.000197023	0.000147635	0.000143828	0.215004	0.462477	647	0.545651
sp|P24090|FETUA_RAT	Alpha-2-HS-glycoprotein OS=Rattus norvegicus OX=10116 GN=Ahsg PE=1 SV=2	0.00115265	0.00154481	0.00141522	0.00154764	0.00190521	0.00145258	0.215389	0.2543	648	0.545784
sp|P19944|RLA1_RAT	60S acidic ribosomal protein P1 OS=Rattus norvegicus OX=10116 GN=Rplp1 PE=3 SV=1	0.00142363	0.00166948	0.00179933	0.00182045	0.0017904	0.00274092	0.215412	0.376608	649	0.545003
sp|O35077|GPDA_RAT	Glycerol-3-phosphate dehydrogenase [NAD(+)], cytoplasmic OS=Rattus norvegicus OX=10116 GN=Gpd1 PE=1 SV=4	0.00124007	0.000856949	0.000671709	0.000520315	8.35472e-05	0.000895316	0.215851	-0.88505	650	0.545274
sp|Q64428|ECHA_RAT	Trifunctional enzyme subunit alpha, mitochondrial OS=Rattus norvegicus OX=10116 GN=Hadha PE=1 SV=2	0.00163074	0.00135409	0.000960134	0.00101998	0.000802513	0.00115411	0.216033	-0.406346	651	0.544895
sp|P02401|RLA2_RAT	60S acidic ribosomal protein P2 OS=Rattus norvegicus OX=10116 GN=Rplp2 PE=1 SV=2	0.00729146	0.00709269	0.00815396	0.00947426	0.00988836	0.00716324	0.21716	0.235033	652	0.546897
sp|P15650|ACADL_RAT	Long-chain specific acyl-CoA dehydrogenase, mitochondrial OS=Rattus norvegicus OX=10116 GN=Acadl PE=1 SV=1	0.000943568	0.000948441	0.00122665	0.00102559	0.000813711	0.000660603	0.218012	-0.319052	653	0.548202
sp|Q08415|KAT1_RAT	Kynurenine--oxoglutarate transaminase 1 OS=Rattus norvegicus OX=10116 GN=Kyat1 PE=1 SV=2	1.33575e-06	2.151e-06	1.44708e-06	0.000122654	0.000413588	1.17e-06	0.220508	6.76718	654	0.553631
sp|P29410|KAD2_RAT	Adenylate kinase 2, mitochondrial OS=Rattus norvegicus OX=10116 GN=Ak2 PE=2 SV=2	0.00260304	0.00204768	0.00122608	0.00184521	0.000853999	0.000950826	0.218832	-0.687121	655	0.548584
sp|Q62785|HAP28_RAT	28 kDa heat- and acid-stable phosphoprotein OS=Rattus norvegicus OX=10116 GN=Pdap1 PE=1 SV=1	0.00164386	0.00105149	0.00129517	0.000716614	0.00128875	0.000941633	0.219649	-0.437334	656	0.549792
sp|P61983|1433G_RAT	14-3-3 protein gamma OS=Rattus norvegicus OX=10116 GN=Ywhag PE=1 SV=2	0.00043804	0.000440302	0.000474547	0.000420104	0.000590243	0.000690023	0.219696	0.329804	657	0.549073
sp|P29411|KAD3_RAT	GTP:AMP phosphotransferase AK3, mitochondrial OS=Rattus norvegicus OX=10116 GN=Ak3 PE=2 SV=2	0.000834109	0.000359321	0.000516358	0.000799956	0.000770696	0.000750818	0.220026	0.441221	658	0.549061
sp|Q5HZY2|SAR1B_RAT	GTP-binding protein SAR1b OS=Rattus norvegicus OX=10116 GN=Sar1b PE=2 SV=1	0.00191255	0.00151048	0.00207195	0.00157221	0.00161989	0.00157811	0.223179	-0.204065	659	0.556085
sp|P97524|S27A2_RAT	Very long-chain acyl-CoA synthetase OS=Rattus norvegicus OX=10116 GN=Slc27a2 PE=1 SV=1	0.000261764	0.000175411	0.000236317	0.000209205	9.4058e-05	0.000183264	0.223223	-0.46914	660	0.555351
sp|Q4V7E8|LRRF2_RAT	Leucine-rich repeat flightless-interacting protein 2 OS=Rattus norvegicus OX=10116 GN=Lrrfip2 PE=1 SV=1	0.000371382	0.000373299	0.000737612	0.000593625	0.000934123	0.000650021	0.223354	0.555021	661	0.554838
sp|Q5U2V4|PLBL1_RAT	Phospholipase B-like 1 OS=Rattus norvegicus OX=10116 GN=Plbd1 PE=2 SV=1	9.83599e-05	0.000148302	0.000213115	0.000235831	0.000159044	0.000258236	0.223549	0.506394	662	0.554484
sp|P38656|LA_RAT	Lupus La protein homolog OS=Rattus norvegicus OX=10116 GN=Ssb PE=1 SV=1	0.000195535	0.00013103	1.44708e-06	6.25095e-05	2.13925e-06	1.17e-06	0.2225	-2.31718	663	0.551047
sp|Q68FP2|PON3_RAT	Serum paraoxonase/lactonase 3 OS=Rattus norvegicus OX=10116 GN=Pon3 PE=2 SV=1	1.33575e-06	2.151e-06	1.44708e-06	0.000293123	8.23672e-05	1.17e-06	0.227497	6.25441	664	0.562575
sp|Q9JLJ3|AL9A1_RAT	4-trimethylaminobutyraldehyde dehydrogenase OS=Rattus norvegicus OX=10116 GN=Aldh9a1 PE=1 SV=1	0.00131412	0.00104572	0.000652503	0.000840208	0.000708291	0.000575019	0.225256	-0.504428	665	0.556197
sp|Q99NA5|IDH3A_RAT	Isocitrate dehydrogenase [NAD] subunit alpha, mitochondrial OS=Rattus norvegicus OX=10116 GN=Idh3a PE=1 SV=1	0.000147809	0.000445715	0.000240191	0.000212635	2.13925e-06	0.000155224	0.22617	-1.17204	666	0.557614
sp|P84079|ARF1_RAT	ADP-ribosylation factor 1 OS=Rattus norvegicus OX=10116 GN=Arf1 PE=1 SV=2	0.0017933	0.00180256	0.00242845	0.0018632	0.00161094	0.00156939	0.227177	-0.256365	667	0.559257
sp|Q642G4|PEX14_RAT	Peroxisomal membrane protein PEX14 OS=Rattus norvegicus OX=10116 GN=Pex14 PE=1 SV=1	0.00057551	0.000578482	0.000233803	0.000344966	0.000232643	0.000302191	0.227804	-0.657546	668	0.55996
sp|Q62940|NEDD4_RAT	E3 ubiquitin-protein ligase NEDD4 OS=Rattus norvegicus OX=10116 GN=Nedd4 PE=1 SV=1	6.09898e-05	9.19571e-05	6.60728e-05	5.84925e-05	2.13925e-06	6.40495e-05	0.225721	-0.812816	669	0.554013
sp|P62853|RS25_RAT	40S ribosomal protein S25 OS=Rattus norvegicus OX=10116 GN=Rps25 PE=2 SV=1	0.00151474	0.00174007	0.00117213	0.00124519	0.000699792	0.00136348	0.228912	-0.42015	670	0.561006
sp|P18395|CSDE1_RAT	Cold shock domain-containing protein E1 OS=Rattus norvegicus OX=10116 GN=Csde1 PE=2 SV=1	0.000101688	0.000136284	3.67209e-05	0.000292572	0.000109616	0.000142386	0.229133	0.987311	671	0.560709
sp|Q9QZM5|ABI1_RAT	Abl interactor 1 OS=Rattus norvegicus OX=10116 GN=Abi1 PE=1 SV=3	1.33575e-06	0.000228476	6.15616e-05	1.44039e-06	2.13925e-06	1.17e-06	0.232367	-5.93891	672	0.567777
sp|P25093|FAAA_RAT	Fumarylacetoacetase OS=Rattus norvegicus OX=10116 GN=Fah PE=1 SV=1	0.000839228	0.000843562	0.000839235	0.000866778	0.00111343	0.00088133	0.229679	0.182209	673	0.560377
sp|P52759|RIDA_RAT	2-iminobutanoate/2-iminopropanoate deaminase OS=Rattus norvegicus OX=10116 GN=Rida PE=1 SV=3	0.0047385	0.00615217	0.00812792	0.00776349	0.0161752	0.00767168	0.232512	0.732988	674	0.566447
sp|D4A3K5|H11_RAT	Histone H1.1 OS=Rattus norvegicus OX=10116 GN=H1-1 PE=1 SV=1	0.000505588	0.000381149	0.000273863	0.000363665	0.000136252	0.000265476	0.233337	-0.600598	675	0.567613
sp|Q5I0P2|GCSH_RAT	Glycine cleavage system H protein, mitochondrial OS=Rattus norvegicus OX=10116 GN=Gcsh PE=2 SV=1	0.00175023	0.0019192	0.00224084	0.00167856	0.00188669	0.00167094	0.233677	-0.174705	676	0.5676
sp|Q6IFU8|K1C17_RAT,sp|Q6IFV3|K1C15_RAT	Keratin, type I cytoskeletal 17 OS=Rattus norvegicus OX=10116 GN=Krt17 PE=1 SV=1,Keratin, type I cytoskeletal 15 OS=Rattus norvegicus OX=10116 GN=Krt15 PE=1 SV=1	0.000124937	2.151e-06	1.44708e-06	0.000119822	6.73394e-05	0.000131205	0.236819	1.30852	677	0.574383
sp|Q5U2X6|CCD47_RAT	Coiled-coil domain-containing protein 47 OS=Rattus norvegicus OX=10116 GN=Ccdc47 PE=2 SV=1	0.000168006	5.62912e-05	6.06694e-05	5.3709e-05	2.13925e-06	5.88115e-05	0.236196	-1.31343	678	0.572027
sp|O35824|DNJA2_RAT	DnaJ homolog subfamily A member 2 OS=Rattus norvegicus OX=10116 GN=Dnaja2 PE=1 SV=1	0.00045957	0.000329959	7.11245e-05	0.000440752	0.000495403	0.000413679	0.234815	0.649277	679	0.567844
sp|O35413|SRBS2_RAT	Sorbin and SH3 domain-containing protein 2 OS=Rattus norvegicus OX=10116 GN=Sorbs2 PE=1 SV=2	0.000588021	0.000522858	0.000710532	0.000455493	0.000341314	0.00061752	0.235195	-0.36494	680	0.567926
sp|P49242|RS3A_RAT	40S ribosomal protein S3a OS=Rattus norvegicus OX=10116 GN=Rps3a PE=1 SV=2	0.0012295	0.000926885	0.000665984	0.000687841	0.000331341	0.000860786	0.235862	-0.586198	681	0.5687
sp|P07633|PCCB_RAT	Propionyl-CoA carboxylase beta chain, mitochondrial OS=Rattus norvegicus OX=10116 GN=Pccb PE=2 SV=1	0.000399985	0.000251281	1.44708e-06	9.59018e-05	5.38965e-05	1.17e-06	0.234097	-2.1122	682	0.563617
sp|Q2M2R8|PEX5_RAT	Peroxisomal targeting signal 1 receptor OS=Rattus norvegicus OX=10116 GN=Pex5 PE=1 SV=2	8.4528e-05	4.24823e-05	0.000228932	0.000324268	0.000227797	0.000133153	0.236782	0.944918	683	0.569246
sp|Q5M824|SHC1_RAT	SHC-transforming protein 1 OS=Rattus norvegicus OX=10116 GN=Shc1 PE=1 SV=1	0.000173021	0.000463772	0.000187441	0.000110624	0.000186512	0.000121134	0.237622	-0.97862	684	0.570432
sp|Q9Z2Y0|KEG1_RAT	Glycine N-acyltransferase-like protein Keg1 OS=Rattus norvegicus OX=10116 GN=Keg1 PE=1 SV=2	0.000183383	2.151e-06	0.000298	1.44039e-06	2.13925e-06	9.62913e-05	0.235605	-2.27548	685	0.564764
sp|P15999|ATPA_RAT	ATP synthase subunit alpha, mitochondrial OS=Rattus norvegicus OX=10116 GN=Atp5f1a PE=1 SV=2	0.00552718	0.00521157	0.00657072	0.00656745	0.00611632	0.00642087	0.237919	0.142361	686	0.569479
sp|P26772|CH10_RAT	10 kDa heat shock protein, mitochondrial OS=Rattus norvegicus OX=10116 GN=Hspe1 PE=1 SV=3	0.00769039	0.00932944	0.00861862	0.00864714	0.00628898	0.00724073	0.238361	-0.209255	687	0.569706
sp|P20650|PPM1A_RAT	Protein phosphatase 1A OS=Rattus norvegicus OX=10116 GN=Ppm1a PE=1 SV=1	1.33575e-06	0.000142349	1.44708e-06	0.000271638	2.13925e-06	0.000371805	0.236735	2.15324	688	0.564999
sp|P05183|CP3A2_RAT	Cytochrome P450 3A2 OS=Rattus norvegicus OX=10116 GN=Cyp3a2 PE=1 SV=2	0.000268343	0.000161837	0.000116283	0.000205884	2.13925e-06	1.17e-06	0.24052	-1.38529	689	0.573198
sp|P70615|LMNB1_RAT	Lamin-B1 OS=Rattus norvegicus OX=10116 GN=Lmnb1 PE=1 SV=3	0.00050688	0.000694769	0.000499204	0.000707092	0.00104313	0.000580701	0.239434	0.454642	690	0.569783
sp|P18614|ITA1_RAT	Integrin alpha-1 OS=Rattus norvegicus OX=10116 GN=Itga1 PE=1 SV=1	0.000206306	0.00018433	7.44999e-05	0.000109921	2.47102e-05	0.000120364	0.239964	-0.867178	691	0.570219
sp|Q63356|MYO1E_RAT	Unconventional myosin-Ie OS=Rattus norvegicus OX=10116 GN=Myo1e PE=1 SV=1	7.33034e-05	7.3682e-05	7.94127e-05	1.44039e-06	7.90189e-05	5.13206e-05	0.238491	-0.780732	692	0.5659
sp|Q7TP52|CMBL_RAT	Carboxymethylenebutenolidase homolog OS=Rattus norvegicus OX=10116 GN=Cmbl PE=2 SV=1	1.33575e-06	0.000443896	0.000478421	0.000423533	0.000595061	0.000579713	0.239989	0.791122	693	0.568632
sp|P62628|DLRB1_RAT	Dynein light chain roadblock-type 1 OS=Rattus norvegicus OX=10116 GN=Dynlrb1 PE=1 SV=3	0.00056352	0.000849645	0.000610485	0.00108089	0.00121492	0.00059179	0.240414	0.51291	694	0.568819
sp|Q80Z70|SE1L1_RAT	Protein sel-1 homolog 1 OS=Rattus norvegicus OX=10116 GN=Sel1l PE=1 SV=2	1.33575e-06	2.151e-06	1.44708e-06	1.44039e-06	0.000146892	3.57757e-05	0.245259	5.2217	695	0.579445
sp|Q5XHZ0|TRAP1_RAT	Heat shock protein 75 kDa, mitochondrial OS=Rattus norvegicus OX=10116 GN=Trap1 PE=1 SV=1	0.000306504	0.000346597	0.000124518	0.000110233	0.000165201	0.000201175	0.242717	-0.706259	696	0.572616
sp|P11915|SCP2_RAT	Sterol carrier protein 2 OS=Rattus norvegicus OX=10116 GN=Scp2 PE=1 SV=3	0.00252193	0.00218702	0.00155356	0.00180215	0.00175907	0.00145405	0.243689	-0.320413	697	0.574085
sp|Q7TP47|HNRPQ_RAT	Heterogeneous nuclear ribonucleoprotein Q OS=Rattus norvegicus OX=10116 GN=Syncrip PE=2 SV=1	0.000253743	0.000306064	0.000164934	0.000292024	2.13925e-06	1.17e-06	0.245223	-1.29512	698	0.576872
sp|P36970|GPX4_RAT	Phospholipid hydroperoxide glutathione peroxidase OS=Rattus norvegicus OX=10116 GN=Gpx4 PE=1 SV=3	0.000137304	2.151e-06	0.000148748	0.000131682	0.00014801	0.000288385	0.244773	0.979002	699	0.574989
sp|Q6PCT5|PQBP1_RAT	Polyglutamine-binding protein 1 OS=Rattus norvegicus OX=10116 GN=Pqbp1 PE=2 SV=1	0.000205696	0.000723652	0.000445678	0.00029591	0.000332601	1.17e-06	0.245595	-1.12677	700	0.576097
sp|Q5XJW2|G45IP_RAT	Growth arrest and DNA damage-inducible proteins-interacting protein 1 OS=Rattus norvegicus OX=10116 GN=Gadd45gip1 PE=2 SV=2	1.33575e-06	0.000119248	0.000514093	1.44039e-06	2.13925e-06	1.17e-06	0.247107	-7.06206	701	0.578817
sp|P41499|PTN11_RAT	Tyrosine-protein phosphatase non-receptor type 11 OS=Rattus norvegicus OX=10116 GN=Ptpn11 PE=1 SV=5	0.000228069	2.151e-06	1.44708e-06	0.000262476	9.83406e-05	0.00023951	0.249208	1.3737	702	0.582905
sp|Q6PEC1|TBCA_RAT	Tubulin-specific chaperone A OS=Rattus norvegicus OX=10116 GN=Tbca PE=1 SV=1	0.00300544	0.00251747	0.00189929	0.00240198	0.00188987	0.00131509	0.248446	-0.404632	703	0.580297
sp|P10633|CP2D1_RAT,sp|P12939|CP2DA_RAT,sp|Q64680|CP2D4_RAT	Cytochrome P450 2D1 OS=Rattus norvegicus OX=10116 GN=Cyp2d1 PE=2 SV=1,Cytochrome P450 2D10 OS=Rattus norvegicus OX=10116 GN=Cyp2d10 PE=1 SV=1,Cytochrome P450 2D4 OS=Rattus norvegicus OX=10116 GN=Cyp2d4 PE=2 SV=1	5.36686e-05	2.151e-06	1.44708e-06	0.000102942	0.000115706	1.17e-06	0.248516	1.94055	704	0.579635
sp|P48500|TPIS_RAT	Triosephosphate isomerase OS=Rattus norvegicus OX=10116 GN=Tpi1 PE=1 SV=2	0.0035848	0.00360331	0.00317747	0.00312547	0.00339591	0.00319424	0.249441	-0.0934227	705	0.580967
sp|P16970|ABCD3_RAT	ATP-binding cassette sub-family D member 3 OS=Rattus norvegicus OX=10116 GN=Abcd3 PE=1 SV=3	1.33575e-06	2.151e-06	1.44708e-06	3.93648e-05	0.000176983	1.17e-06	0.255118	5.46228	706	0.593348
sp|P47875|CSRP1_RAT	Cysteine and glycine-rich protein 1 OS=Rattus norvegicus OX=10116 GN=Csrp1 PE=1 SV=2	0.0019621	0.00197223	0.00227746	0.00174735	0.00211509	0.00161899	0.250087	-0.180458	707	0.580824
sp|Q4V886|PAF1_RAT	RNA polymerase II-associated factor 1 homolog OS=Rattus norvegicus OX=10116 GN=Paf1 PE=2 SV=1	5.05588e-05	2.151e-06	1.44708e-06	9.69773e-05	2.13925e-06	0.00010619	0.245094	1.92257	708	0.568425
sp|O35244|PRDX6_RAT	Peroxiredoxin-6 OS=Rattus norvegicus OX=10116 GN=Prdx6 PE=1 SV=3	0.00193207	0.00242756	0.00248555	0.00254782	0.00247322	0.00253624	0.251321	0.142781	709	0.582045
sp|P84100|RL19_RAT	60S ribosomal protein L19 OS=Rattus norvegicus OX=10116 GN=Rpl19 PE=1 SV=1	0.00027601	0.000416153	0.000149507	0.000264708	2.13925e-06	0.000144928	0.255687	-1.03139	710	0.591322
sp|Q5EIC4|I2BPL_RAT	Probable E3 ubiquitin-protein ligase IRF2BPL OS=Rattus norvegicus OX=10116 GN=Irf2bpl PE=1 SV=1	6.90906e-05	0.000173618	1.44708e-06	1.44039e-06	2.13925e-06	3.62783e-05	0.255696	-2.61486	711	0.590509
sp|P62076|TIM13_RAT	Mitochondrial import inner membrane translocase subunit Tim13 OS=Rattus norvegicus OX=10116 GN=Timm13 PE=3 SV=1	0.00142363	0.00200337	0.00185073	0.00218454	0.00214848	0.00179406	0.25565	0.215281	712	0.589574
sp|Q812D1|PSIP1_RAT	PC4 and SFRS1-interacting protein OS=Rattus norvegicus OX=10116 GN=Psip1 PE=1 SV=1	0.000307375	0.000360455	0.000332992	0.000196526	0.000110447	0.000376594	0.256203	-0.550032	713	0.590021
sp|Q5I0D7|PEPD_RAT	Xaa-Pro dipeptidase OS=Rattus norvegicus OX=10116 GN=Pepd PE=2 SV=1	0.000109955	0.000165784	0.000238238	0.000369085	0.000533378	0.000115471	0.256798	0.985867	714	0.590564
sp|P02091|HBB1_RAT	Hemoglobin subunit beta-1 OS=Rattus norvegicus OX=10116 GN=Hbb PE=1 SV=3	0.00975235	0.00850801	0.01515	0.0116472	0.0362987	0.0164252	0.257307	0.946117	715	0.590907
sp|B0BN56|RT31_RAT	28S ribosomal protein S31, mitochondrial OS=Rattus norvegicus OX=10116 GN=Mrps31 PE=2 SV=1	0.000209682	0.00014051	0.000151438	6.70321e-05	0.000150687	0.000146801	0.258183	-0.460625	716	0.592089
sp|Q6P7B0|SYWC_RAT	Tryptophan--tRNA ligase, cytoplasmic OS=Rattus norvegicus OX=10116 GN=Wars1 PE=1 SV=2	0.00011247	0.000169576	6.09216e-05	0.000107865	6.06195e-05	1.17e-06	0.259599	-1.01547	717	0.594507
sp|P04642|LDHA_RAT	L-lactate dehydrogenase A chain OS=Rattus norvegicus OX=10116 GN=Ldha PE=1 SV=1	0.000896201	0.00114651	0.000617841	0.000937642	0.000439126	0.00034224	0.260143	-0.630148	718	0.594923
sp|P47198|RL22_RAT	60S ribosomal protein L22 OS=Rattus norvegicus OX=10116 GN=Rpl22 PE=2 SV=2	0.00042264	0.000424823	1.44708e-06	1.44039e-06	2.13925e-06	0.000221921	0.260646	-1.91248	719	0.595244
sp|Q5PPI1|SRSF9_RAT	Serine/arginine-rich splicing factor 9 OS=Rattus norvegicus OX=10116 GN=Srsf9 PE=1 SV=1	0.000244787	0.000246051	0.000132594	1.44039e-06	2.13925e-06	0.000257067	0.263503	-1.25814	720	0.600934
sp|Q4G061|EIF3B_RAT	Eukaryotic translation initiation factor 3 subunit B OS=Rattus norvegicus OX=10116 GN=Eif3b PE=1 SV=1	0.000339385	0.000341137	0.000477971	0.000423135	0.000219508	0.000142564	0.262389	-0.561104	721	0.597564
sp|P28042|SSBP_RAT	Single-stranded DNA-binding protein, mitochondrial OS=Rattus norvegicus OX=10116 GN=Ssbp1 PE=1 SV=2	1.33575e-06	0.000180057	0.000776246	0.000343595	0.0011586	0.000752475	0.262776	1.23536	722	0.597616
sp|P19804|NDKB_RAT	Nucleoside diphosphate kinase B OS=Rattus norvegicus OX=10116 GN=Nme2 PE=1 SV=1	0.00391498	0.00321971	0.0038557	0.00256001	0.000383658	0.0039245	0.262624	-0.678244	723	0.596442
sp|P63159|HMGB1_RAT	High mobility group protein B1 OS=Rattus norvegicus OX=10116 GN=Hmgb1 PE=1 SV=2	0.00239037	0.00189688	0.0024533	0.00156855	0.00189866	0.00224605	0.26294	-0.238553	724	0.596335
sp|Q66X93|SND1_RAT	Staphylococcal nuclease domain-containing protein 1 OS=Rattus norvegicus OX=10116 GN=Snd1 PE=1 SV=1	0.000684407	0.000508478	0.000548027	0.00071346	0.000609463	0.000656243	0.264097	0.185049	725	0.598135
sp|Q9JLZ1|GLRX3_RAT	Glutaredoxin-3 OS=Rattus norvegicus OX=10116 GN=Glrx3 PE=1 SV=2	0.000481584	0.000484071	0.000173907	0.000384888	0.000605655	0.000674325	0.2644	0.546929	726	0.597996
sp|P12928|KPYR_RAT	Pyruvate kinase PKLR OS=Rattus norvegicus OX=10116 GN=Pklr PE=1 SV=2	0.000659731	0.000615771	0.000153153	0.000225971	0.000203192	0.000346414	0.264792	-0.881317	727	0.598059
sp|P62755|RS6_RAT	40S ribosomal protein S6 OS=Rattus norvegicus OX=10116 GN=Rps6 PE=1 SV=1	0.000434521	0.000436765	0.000470736	0.000520912	0.000234201	1.17e-06	0.264982	-0.827411	728	0.597664
sp|P28037|AL1L1_RAT	Cytosolic 10-formyltetrahydrofolate dehydrogenase OS=Rattus norvegicus OX=10116 GN=Aldh1l1 PE=1 SV=3	0.000749694	0.000602852	0.000519793	0.000805277	0.000614193	0.000818796	0.265243	0.25754	729	0.597434
sp|Q5M7V8|TR150_RAT	Thyroid hormone receptor-associated protein 3 OS=Rattus norvegicus OX=10116 GN=Thrap3 PE=1 SV=1	0.000483525	0.000457432	0.000308131	0.00027278	0.000275943	0.000418174	0.265318	-0.369442	730	0.596784
sp|P49889|ST1E3_RAT	Estrogen sulfotransferase, isoform 3 OS=Rattus norvegicus OX=10116 GN=Ste PE=1 SV=1	0.000458457	0.000737319	0.000993332	0.000703496	2.13925e-06	0.000481457	0.265507	-0.882912	731	0.596392
sp|Q9Z0J5|TRXR2_RAT	Thioredoxin reductase 2, mitochondrial OS=Rattus norvegicus OX=10116 GN=Txnrd2 PE=1 SV=3	1.33575e-06	2.151e-06	1.44708e-06	4.93183e-05	0.000277167	1.17e-06	0.274926	6.05333	732	0.616705
sp|Q63083|NUCB1_RAT	Nucleobindin-1 OS=Rattus norvegicus OX=10116 GN=Nucb1 PE=1 SV=1	0.00141432	0.00124392	0.00121299	0.00124338	0.00266805	0.00160905	0.271881	0.511998	733	0.609043
sp|Q75Q39|TOM70_RAT	Mitochondrial import receptor subunit TOM70 OS=Rattus norvegicus OX=10116 GN=Tomm70 PE=1 SV=1	0.000443426	0.000445715	0.000336267	0.000382742	0.0001434	0.000372537	0.274453	-0.447385	734	0.613968
sp|Q6TQE1|ZCH18_RAT	Zinc finger CCCH domain-containing protein 18 OS=Rattus norvegicus OX=10116 GN=Zc3h18 PE=1 SV=1	5.71256e-05	8.61309e-05	6.18866e-05	1.44039e-06	6.15797e-05	5.99914e-05	0.276203	-0.737837	735	0.617041
sp|Q5U2U0|CLPX_RAT	ATP-dependent Clp protease ATP-binding subunit clpX-like, mitochondrial OS=Rattus norvegicus OX=10116 GN=Clpx PE=2 SV=1	0.000683702	0.000773137	0.00050922	0.000532762	0.000552758	0.000583376	0.277546	-0.236412	736	0.619199
sp|Q63276|BAAT_RAT	Bile acid-CoA:amino acid N-acyltransferase OS=Rattus norvegicus OX=10116 GN=Baat PE=1 SV=2	0.00161006	0.0012947	0.00146517	0.00117354	0.00152732	0.000946864	0.278014	-0.260609	737	0.619402
sp|P85834|EFTU_RAT	Elongation factor Tu, mitochondrial OS=Rattus norvegicus OX=10116 GN=Tufm PE=1 SV=1	0.00179529	0.00180456	0.00116695	0.00126264	0.00122567	0.00144543	0.278568	-0.277116	738	0.619796
sp|P13832|MRLCA_RAT	Myosin regulatory light chain RLC-A OS=Rattus norvegicus OX=10116 GN=Rlc-a PE=2 SV=2	0.000786307	0.000948441	0.000170368	0.00105576	0.00135619	0.000660603	0.279063	0.689555	739	0.620056
sp|P22071|3BHS1_RAT,sp|Q62878|3BHS4_RAT	3 beta-hydroxysteroid dehydrogenase/Delta 5--)4-isomerase type 1 OS=Rattus norvegicus OX=10116 GN=Hsd3b1 PE=1 SV=3,3 beta-hydroxysteroid dehydrogenase/Delta 5--)4-isomerase type 4 OS=Rattus norvegicus OX=10116 GN=Hsd3b6 PE=2 SV=4	1.33575e-06	2.151e-06	1.44708e-06	1.44039e-06	0.000469029	7.61553e-05	0.281067	6.7917	740	0.623665
sp|Q68FX0|IDH3B_RAT	Isocitrate dehydrogenase [NAD] subunit beta, mitochondrial OS=Rattus norvegicus OX=10116 GN=Idh3B PE=2 SV=1	0.000351285	0.00021186	0.000228337	0.000269521	0.00015147	0.000147563	0.279571	-0.477258	741	0.619507
sp|F1LRS8|CD2AP_RAT	CD2-associated protein OS=Rattus norvegicus OX=10116 GN=Cd2ap PE=1 SV=2	0.000721872	0.00055487	0.000644029	0.000570141	0.00022887	0.000624306	0.280036	-0.432428	742	0.619702
sp|Q64560|TPP2_RAT	Tripeptidyl-peptidase 2 OS=Rattus norvegicus OX=10116 GN=Tpp2 PE=2 SV=3	0.000151595	0.000108842	4.69228e-05	0.000207698	0.00014007	0.000113715	0.281555	0.586347	743	0.622224
sp|Q68FT9|SCLY_RAT	Selenocysteine lyase OS=Rattus norvegicus OX=10116 GN=Scly PE=1 SV=1	0.00018784	0.000314683	0.000203495	0.000240198	0.000134991	0.000131509	0.282408	-0.47858	744	0.623271
sp|P35435|ATPG_RAT	ATP synthase subunit gamma, mitochondrial OS=Rattus norvegicus OX=10116 GN=Atp5f1c PE=1 SV=2	0.00138713	0.000995921	0.00118072	0.00123531	0.000854446	0.000832408	0.283595	-0.286367	745	0.625052
sp|Q6P7S1|ASAH1_RAT	Acid ceramidase OS=Rattus norvegicus OX=10116 GN=Asah1 PE=1 SV=1	0.000137304	2.151e-06	1.44708e-06	0.000197524	2.13925e-06	0.000360481	0.283865	1.9911	746	0.624808
sp|F1M775|DIAP1_RAT	Protein diaphanous homolog 1 OS=Rattus norvegicus OX=10116 GN=Diaph1 PE=1 SV=3	4.27652e-05	6.4479e-05	2.31647e-05	2.05071e-05	2.13925e-06	4.49106e-05	0.290123	-0.948867	747	0.637726
sp|P97852|DHB4_RAT	Peroxisomal multifunctional enzyme type 2 OS=Rattus norvegicus OX=10116 GN=Hsd17b4 PE=1 SV=3	0.000588821	0.000443896	0.000358816	0.000352945	0.000198354	0.00046377	0.286549	-0.455098	748	0.629029
sp|P09895|RL5_RAT	60S ribosomal protein L5 OS=Rattus norvegicus OX=10116 GN=Rpl5 PE=1 SV=3	0.00218577	0.00183088	0.00207195	0.0017469	0.00127628	0.00210414	0.287759	-0.247909	749	0.630841
sp|Q1HCL7|NAKD2_RAT	NAD kinase 2, mitochondrial OS=Rattus norvegicus OX=10116 GN=Nadk2 PE=1 SV=1	0.000318223	0.00019192	0.000275796	0.000305193	0.000274428	0.0005347	0.291255	0.503676	750	0.637653
sp|Q63617|HYOU1_RAT	Hypoxia up-regulated protein 1 OS=Rattus norvegicus OX=10116 GN=Hyou1 PE=1 SV=1	0.00162456	0.00136079	0.00158396	0.00129837	0.00148855	0.00142172	0.291914	-0.118627	751	0.638245
sp|Q9QY17|PACN2_RAT	Protein kinase C and casein kinase substrate in neurons 2 protein OS=Rattus norvegicus OX=10116 GN=Pacsin2 PE=1 SV=2	0.000332569	0.000278572	0.000240191	0.000212635	0.00029875	0.000174627	0.292081	-0.311491	752	0.637762
sp|Q32PX7|FUBP1_RAT	Far upstream element-binding protein 1 OS=Rattus norvegicus OX=10116 GN=Fubp1 PE=1 SV=1	0.000592622	0.000638231	0.000504439	0.000324775	0.000638829	0.000400084	0.29336	-0.347665	753	0.639704
sp|Q63692|CDC37_RAT	Hsp90 co-chaperone Cdc37 OS=Rattus norvegicus OX=10116 GN=Cdc37 PE=1 SV=2	0.000285477	0.000286951	0.000463905	0.000205341	7.6934e-05	0.000374748	0.293415	-0.657471	754	0.638976
sp|Q03248|BUP1_RAT	Beta-ureidopropionase OS=Rattus norvegicus OX=10116 GN=Upb1 PE=1 SV=1	0.000481788	0.000415094	0.000298252	0.00052807	2.13925e-06	1.17e-06	0.294334	-1.16936	755	0.640129
sp|Q75WE7|VWA5A_RAT	von Willebrand factor A domain-containing protein 5A OS=Rattus norvegicus OX=10116 GN=Vwa5a PE=2 SV=1	1.33575e-06	9.92286e-05	1.44708e-06	0.000157795	0.00017736	1.17e-06	0.293178	1.72112	756	0.636771
sp|Q63120|MRP2_RAT	Canalicular multispecific organic anion transporter 1 OS=Rattus norvegicus OX=10116 GN=Abcc2 PE=1 SV=1	1.33575e-06	5.29305e-05	1.90158e-05	3.36683e-05	7.56859e-05	3.68669e-05	0.296871	0.99662	757	0.643938
sp|Q561S0|NDUAA_RAT	NADH dehydrogenase [ubiquinone] 1 alpha subcomplex subunit 10, mitochondrial OS=Rattus norvegicus OX=10116 GN=Ndufa10 PE=1 SV=1	1.33575e-06	0.000153175	1.44708e-06	0.000219223	0.000328541	1.17e-06	0.294653	1.81547	758	0.638285
sp|Q63610|TPM3_RAT	Tropomyosin alpha-3 chain OS=Rattus norvegicus OX=10116 GN=Tpm3 PE=1 SV=2	0.00229044	0.00230226	0.00200869	0.00251046	0.00211631	0.00263442	0.296438	0.137435	759	0.641306
sp|O09171|BHMT1_RAT	Betaine--homocysteine S-methyltransferase 1 OS=Rattus norvegicus OX=10116 GN=Bhmt PE=1 SV=1	0.00471861	0.00467618	0.00532787	0.00471662	0.0036537	0.00481575	0.296881	-0.159024	760	0.64142
sp|P00762|TRY1_RAT	Anionic trypsin-1 OS=Rattus norvegicus OX=10116 GN=Prss1 PE=1 SV=1	1.33575e-06	0.000331569	0.000357357	0.000316359	0.000474114	0.000346414	0.297494	0.719872	761	0.6419
sp|P15429|ENOB_RAT	Beta-enolase OS=Rattus norvegicus OX=10116 GN=Eno3 PE=1 SV=3	0.000498598	0.000501173	0.000337596	0.000597729	2.13925e-06	1.17e-06	0.29918	-1.15387	762	0.644689
sp|Q9JI85|NUCB2_RAT	Nucleobindin-2 OS=Rattus norvegicus OX=10116 GN=Nucb2 PE=1 SV=1	0.00296251	0.00271886	0.00313964	0.00296473	0.00423485	0.00311113	0.301902	0.225128	763	0.649703
sp|Q5XIC0|ECI2_RAT	Enoyl-CoA delta isomerase 2 OS=Rattus norvegicus OX=10116 GN=Eci2 PE=1 SV=1	0.000760968	0.000764898	0.000974279	0.000862503	0.000894874	0.00116239	0.302538	0.223842	764	0.650218
sp|O88202|LPP60_RAT	60 kDa lysophospholipase OS=Rattus norvegicus OX=10116 GN=Aspg PE=1 SV=1	0.000143877	0.000337448	0.000103912	1.44039e-06	5.16985e-05	0.000201461	0.305433	-1.20079	765	0.655583
sp|P04041|GPX1_RAT	Glutathione peroxidase 1 OS=Rattus norvegicus OX=10116 GN=Gpx1 PE=1 SV=4	0.00188401	0.00148794	0.00204103	0.0016778	0.00130558	0.00169588	0.304845	-0.210139	766	0.653466
sp|B0BN94|F136A_RAT	Protein FAM136A OS=Rattus norvegicus OX=10116 GN=Fam136a PE=1 SV=1	0.00117604	0.000788077	0.0014864	0.00131587	0.00232419	0.00123504	0.305458	0.498618	767	0.653926
sp|Q01177|PLMN_RAT	Plasminogen OS=Rattus norvegicus OX=10116 GN=Plg PE=2 SV=2	0.000532984	0.000636187	0.000469142	0.000702846	0.000861812	0.000489757	0.305931	0.326517	768	0.654086
sp|Q7TMA5|APOB_RAT	Apolipoprotein B-100 OS=Rattus norvegicus OX=10116 GN=Apob PE=1 SV=1	1.33575e-06	2.86619e-05	4.94258e-05	3.28165e-05	6.14758e-05	4.19232e-05	0.30983	0.778255	769	0.661561
sp|Q9R0T3|DNJC3_RAT	DnaJ homolog subfamily C member 3 OS=Rattus norvegicus OX=10116 GN=Dnajc3 PE=1 SV=3	0.000697691	0.000593403	0.000581415	0.000772066	0.000578531	0.000789054	0.311625	0.192403	770	0.66453
sp|Q8VHT6|AS3MT_RAT	Arsenite methyltransferase OS=Rattus norvegicus OX=10116 GN=As3mt PE=1 SV=1	0.00021991	0.000147364	7.94127e-05	1.44039e-06	0.000158038	7.69809e-05	0.312899	-0.917673	771	0.666382
sp|P62907|RL10A_RAT	60S ribosomal protein L10a OS=Rattus norvegicus OX=10116 GN=Rpl10a PE=1 SV=2	0.000997197	0.00075176	0.000540153	0.000717274	2.13925e-06	0.000654515	0.312252	-0.73648	772	0.664141
sp|O88767|PARK7_RAT	Parkinson disease protein 7 homolog OS=Rattus norvegicus OX=10116 GN=Park7 PE=1 SV=1	0.00243298	0.00258939	0.00186053	0.00233336	0.00262268	0.00285562	0.312542	0.182612	773	0.6639
sp|P39052|DYN2_RAT	Dynamin-2 OS=Rattus norvegicus OX=10116 GN=Dnm2 PE=1 SV=1	6.21815e-05	9.37539e-05	0.000134728	1.44039e-06	0.000100545	6.5301e-05	0.314778	-0.797031	774	0.667785
sp|P04797|G3P_RAT	Glyceraldehyde-3-phosphate dehydrogenase OS=Rattus norvegicus OX=10116 GN=Gapdh PE=1 SV=3	0.00243684	0.00228613	0.00167196	0.00210336	0.00148855	0.00179137	0.314797	-0.248447	775	0.666964
sp|B5DF91|ELAV1_RAT	ELAV-like protein 1 OS=Rattus norvegicus OX=10116 GN=Elavl1 PE=1 SV=1	0.00074675	0.000500404	0.000808987	0.000557024	2.13925e-06	0.000697078	0.314791	-0.710826	776	0.666092
sp|Q9Z1E1|FLOT1_RAT	Flotillin-1 OS=Rattus norvegicus OX=10116 GN=Flot1 PE=2 SV=2	6.31985e-05	0.000190575	1.44708e-06	0.000181832	0.000340631	6.6369e-05	0.3158	1.20611	777	0.667367
sp|P38983|RSSA_RAT	40S ribosomal protein SA OS=Rattus norvegicus OX=10116 GN=Rpsa PE=1 SV=3	0.00128368	0.00129031	0.001788	0.00123112	0.000889566	0.00144437	0.31675	-0.291061	778	0.668514
sp|P27321|ICAL_RAT	Calpastatin OS=Rattus norvegicus OX=10116 GN=Cast PE=1 SV=3	0.000986358	0.000991451	0.00119186	0.000909587	0.00110416	0.00067728	0.320245	-0.236175	779	0.675023
sp|P56574|IDHP_RAT	Isocitrate dehydrogenase [NADP], mitochondrial OS=Rattus norvegicus OX=10116 GN=Idh2 PE=1 SV=2	0.000598428	0.000601519	0.000453812	0.00045914	0.000580579	0.00012569	0.322814	-0.504912	780	0.679564
sp|P08010|GSTM2_RAT	Glutathione S-transferase Mu 2 OS=Rattus norvegicus OX=10116 GN=Gstm2 PE=1 SV=2	0.000744467	0.000623593	0.000268838	0.000832981	0.000668761	0.000651512	0.326304	0.395555	781	0.686033
sp|Q8VBU2|NDRG2_RAT	Protein NDRG2 OS=Rattus norvegicus OX=10116 GN=Ndrg2 PE=1 SV=1	0.000291633	0.000293139	0.000157969	0.000279692	2.13925e-06	0.000153132	0.326762	-0.771968	782	0.686116
sp|Q497C3|MTL26_RAT	Methyltransferase-like 26 OS=Rattus norvegicus OX=10116 GN=Mettl26 PE=2 SV=2	1.33575e-06	0.000266555	0.000574575	0.000127164	0	0.000139245	0.325595	-1.66098	783	0.682793
sp|P13383|NUCL_RAT	Nucleolin OS=Rattus norvegicus OX=10116 GN=Ncl PE=1 SV=3	0.00121398	0.00125838	0.00102747	0.00101874	0.00094058	0.0011952	0.327699	-0.149863	784	0.686328
sp|Q5U2R7|MESD_RAT	LRP chaperone MESD OS=Rattus norvegicus OX=10116 GN=Mesd PE=2 SV=1	0.00169056	0.00121378	0.00117736	0.00104229	0.000911187	0.00139493	0.327941	-0.285695	785	0.685961
sp|O70199|UGDH_RAT	UDP-glucose 6-dehydrogenase OS=Rattus norvegicus OX=10116 GN=Ugdh PE=1 SV=1	0.000438928	0.000330896	0.000356632	0.000368337	2.13925e-06	0.000345711	0.328085	-0.653384	786	0.68539
sp|P62078|TIM8B_RAT	Mitochondrial import inner membrane translocase subunit Tim8 B OS=Rattus norvegicus OX=10116 GN=Timm8b PE=3 SV=1	0.000977673	0.000655148	0.000353052	0.000937642	0.000702602	0.00102672	0.329419	0.425425	787	0.687302
sp|P62914|RL11_RAT	60S ribosomal protein L11 OS=Rattus norvegicus OX=10116 GN=Rpl11 PE=1 SV=2	0.000303921	0.000152745	0.000329251	0.000291477	2.13925e-06	0.000159584	0.330242	-0.794229	788	0.688144
sp|Q09073|ADT2_RAT	ADP/ATP translocase 2 OS=Rattus norvegicus OX=10116 GN=Slc25a5 PE=1 SV=3	0.000453842	0.000638659	0.000491666	0.000522311	2.13925e-06	0.00047661	0.330406	-0.662197	789	0.687613
sp|Q71TY3|RS27_RAT	40S ribosomal protein S27 OS=Rattus norvegicus OX=10116 GN=Rps27 PE=1 SV=3	0.00161006	2.151e-06	0.000697698	0.000617653	2.13925e-06	1.17e-06	0.330609	-1.89526	790	0.687165
sp|P02761|MUP_RAT	Major urinary protein OS=Rattus norvegicus OX=10116 PE=1 SV=1	0.00239107	0.00285406	0.00404742	0.0110359	0.00370516	0.00313878	0.331188	0.944184	791	0.687498
sp|P68255|1433T_RAT	14-3-3 protein theta OS=Rattus norvegicus OX=10116 GN=Ywhaq PE=1 SV=1	0.000110404	0.000332922	0.000358816	0.000211767	2.13925e-06	0.000231885	0.3322	-0.84749	792	0.688727
sp|I6L9G5|RCN3_RAT	Reticulocalbin-3 OS=Rattus norvegicus OX=10116 GN=Rcn3 PE=1 SV=1	8.24663e-05	0.000248677	1.44708e-06	0.000158179	0.000266689	0.000173207	0.332262	0.846582	793	0.687988
sp|Q62835|RABE2_RAT	Rab GTPase-binding effector protein 2 OS=Rattus norvegicus OX=10116 GN=Rabep2 PE=1 SV=1	0.000195299	0.000196308	0.00026447	9.36513e-05	0.000210527	0.000205097	0.332604	-0.36542	794	0.687829
sp|P02650|APOE_RAT	Apolipoprotein E OS=Rattus norvegicus OX=10116 GN=Apoe PE=1 SV=2	0.000780259	0.000435715	0.000469604	0.00074831	0.00056073	0.000819402	0.332647	0.336555	795	0.687051
sp|Q4KM62|PALMD_RAT	Palmdelphin OS=Rattus norvegicus OX=10116 GN=Palmd PE=1 SV=1	0.000638179	0.000690818	0.000850913	0.000706209	0.00100545	0.000824855	0.33278	0.218577	796	0.686464
sp|P30009|MARCS_RAT	Myristoylated alanine-rich C-kinase substrate OS=Rattus norvegicus OX=10116 GN=Marcks PE=1 SV=2	0.000962908	0.00131984	0.00132766	0.000923481	0.00113235	0.00110314	0.333348	-0.192704	797	0.686772
sp|Q3T1J1|IF5A1_RAT	Eukaryotic translation initiation factor 5A-1 OS=Rattus norvegicus OX=10116 GN=Eif5a PE=1 SV=3	0.002459	0.00282479	0.00266394	0.00218986	0.00284006	0.002029	0.333475	-0.171095	798	0.686174
sp|P14659|HSP72_RAT	Heat shock-related 70 kDa protein 2 OS=Rattus norvegicus OX=10116 GN=Hspa2 PE=1 SV=2	0.000897359	0.000773137	0.00050922	0.000614726	0.000460632	0.000673126	0.333548	-0.318036	799	0.685464
sp|P00787|CATB_RAT	Cathepsin B OS=Rattus norvegicus OX=10116 GN=Ctsb PE=1 SV=2	0.000558533	0.000721822	0.000864404	0.00107133	0.00111815	0.000586553	0.33362	0.372209	800	0.684754
sp|O70593|SGTA_RAT	Small glutamine-rich tetratricopeptide repeat-containing protein alpha OS=Rattus norvegicus OX=10116 GN=Sgta PE=1 SV=1	0.00025843	0.000519528	1.44708e-06	0.000660928	0.000278579	0.000452324	0.333965	0.83654	801	0.684608
sp|Q3MIE4|VAT1_RAT	Synaptic vesicle membrane protein VAT-1 homolog OS=Rattus norvegicus OX=10116 GN=Vat1 PE=1 SV=1	6.69529e-05	2.151e-06	0.000580263	0.000513692	0.000505213	0.000281247	0.334942	1.00157	802	0.685755
sp|P63018|HSP7C_RAT	Heat shock cognate 71 kDa protein OS=Rattus norvegicus OX=10116 GN=Hspa8 PE=1 SV=1	0.00280539	0.00252526	0.00213197	0.00252989	0.00176031	0.0021986	0.334879	-0.20173	803	0.684771
sp|Q5XIW8|SNUT1_RAT	U4/U6.U5 tri-snRNP-associated protein 1 OS=Rattus norvegicus OX=10116 GN=Sart1 PE=1 SV=1	0.000402714	0.000337328	0.000290852	0.000386225	0.000144705	0.000246702	0.335345	-0.406738	804	0.684871
sp|P70501|RBM10_RAT	RNA-binding protein 10 OS=Rattus norvegicus OX=10116 GN=Rbm10 PE=1 SV=1	1.33575e-06	6.38231e-05	1.44708e-06	1.44039e-06	6.8446e-05	0.000200042	0.335301	2.01885	805	0.683932
sp|P19999|MBL1_RAT	Mannose-binding protein A OS=Rattus norvegicus OX=10116 GN=Mbl1 PE=1 SV=1	1.33575e-06	0.000228476	0.000492492	1.44039e-06	0.000122513	0.000119353	0.339655	-1.56984	806	0.691952
sp|Q9EPX0|HSPB8_RAT	Heat shock protein beta-8 OS=Rattus norvegicus OX=10116 GN=Hspb8 PE=1 SV=1	1.33575e-06	0.00055487	0.000598027	0.000397063	2.13925e-06	1.17e-06	0.341469	-1.52752	807	0.694785
sp|P00502|GSTA1_RAT	Glutathione S-transferase alpha-1 OS=Rattus norvegicus OX=10116 GN=Gsta1 PE=1 SV=3	0.00207132	0.00208201	0.00197995	0.00198651	0.00197013	0.00204727	0.341598	-0.0307562	808	0.694189
sp|Q3ZU82|GOGA5_RAT	Golgin subfamily A member 5 OS=Rattus norvegicus OX=10116 GN=Golga5 PE=1 SV=1	0.000222931	0.000112041	0.000120755	0.000178169	0.00036047	0.000156077	0.341732	0.60825	809	0.693603
sp|Q7M0E3|DEST_RAT	Destrin OS=Rattus norvegicus OX=10116 GN=Dstn PE=1 SV=3	0.000655732	0.000988678	0.000532787	0.000471662	0.000530145	0.000688629	0.342561	-0.365077	810	0.694426
sp|P47967|LEG5_RAT	Galectin-5 OS=Rattus norvegicus OX=10116 GN=Lgals5 PE=1 SV=2	1.33575e-06	0.000375016	0.000202092	0.000178906	2.13925e-06	1.17e-06	0.34366	-1.66653	811	0.695794
sp|Q6P4Z9|CSN8_RAT	COP9 signalosome complex subunit 8 OS=Rattus norvegicus OX=10116 GN=Cops8 PE=2 SV=1	1.33575e-06	0.000260178	0.000140207	0.000124122	2.13925e-06	1.17e-06	0.343664	-1.65648	812	0.694946
sp|P21531|RL3_RAT	60S ribosomal protein L3 OS=Rattus norvegicus OX=10116 GN=Rpl3 PE=1 SV=3	0.000134238	6.74656e-05	7.27129e-05	0.000193112	7.23523e-05	0.000140972	0.343725	0.566664	813	0.694215
sp|Q4KM35|PSB10_RAT	Proteasome subunit beta type-10 OS=Rattus norvegicus OX=10116 GN=Psmb10 PE=2 SV=1	0.000198161	0.000298776	0.000322014	0.000190047	2.13925e-06	0.000312153	0.344176	-0.699383	814	0.694271
sp|Q5M823|NUDC2_RAT	NudC domain-containing protein 2 OS=Rattus norvegicus OX=10116 GN=Nudcd2 PE=2 SV=1	0.000344573	2.151e-06	0.000186645	0.000165232	2.13925e-06	1.17e-06	0.342337	-1.66203	815	0.689714
sp|Q3KR59|UBP10_RAT	Ubiquitin carboxyl-terminal hydrolase 10 OS=Rattus norvegicus OX=10116 GN=Usp10 PE=1 SV=1	1.33575e-06	3.42426e-05	3.69059e-05	1.44039e-06	0.000110169	7.15515e-05	0.336605	1.33737	816	0.677335
sp|O35783|CALU_RAT	Calumenin OS=Rattus norvegicus OX=10116 GN=Calu PE=1 SV=1	0.00154565	0.0012947	0.0017675	0.00189414	0.00194387	0.00144284	0.345353	0.196673	817	0.694088
sp|Q5XIF4|SUMO3_RAT	Small ubiquitin-related modifier 3 OS=Rattus norvegicus OX=10116 GN=Sumo3 PE=3 SV=1	0.000491799	0.000494339	0.000532787	0.000471662	2.13925e-06	0.000516472	0.345745	-0.617153	818	0.694026
sp|P10715|CYC2_RAT	Cytochrome c, testis-specific OS=Rattus norvegicus OX=10116 GN=Cyct PE=2 SV=2	0.000257609	0.000258939	0.000279079	0.000247061	2.13925e-06	0.000270533	0.345648	-0.614322	819	0.692985
sp|Q6AYH6|EMC10_RAT	ER membrane protein complex subunit 10 OS=Rattus norvegicus OX=10116 GN=Emc10 PE=1 SV=1	0.000209682	0.000210765	0.000227157	0.000201096	2.13925e-06	0.000220201	0.345602	-0.612966	820	0.692047
sp|P52845|ST1E2_RAT	Estrogen sulfotransferase, isoform 2 OS=Rattus norvegicus OX=10116 GN=Ste2 PE=1 SV=1	0.000275074	0.000645154	0.000893999	0.000615559	2.13925e-06	0.000385165	0.346379	-0.85523	821	0.692758
sp|P04903|GSTA2_RAT	Glutathione S-transferase alpha-2 OS=Rattus norvegicus OX=10116 GN=Gsta2 PE=1 SV=2	0.00182763	0.00146966	0.00171596	0.00163595	0.00183879	0.00204727	0.346268	0.139448	822	0.691694
sp|P11510|CP2CC_RAT	Cytochrome P450 2C12, female-specific OS=Rattus norvegicus OX=10116 GN=Cyp2c12 PE=2 SV=1	1.33575e-06	5.5487e-05	5.98027e-05	0.000105883	0.000238024	1.17e-06	0.344244	1.56504	823	0.686815
sp|Q3MID3|ARFG2_RAT	ADP-ribosylation factor GTPase-activating protein 2 OS=Rattus norvegicus OX=10116 GN=Arfgap2 PE=1 SV=1	0.000624207	0.000575144	0.000732583	0.000798198	0.000785023	0.000600895	0.346522	0.177003	824	0.69052
sp|P27867|DHSO_RAT	Sorbitol dehydrogenase OS=Rattus norvegicus OX=10116 GN=Sord PE=1 SV=4	0.00151535	0.0012947	0.0013954	0.00116264	0.00138848	0.00135266	0.348418	-0.107385	825	0.693457
sp|Q5XI97|AASD1_RAT	Alanyl-tRNA editing protein Aarsd1 OS=Rattus norvegicus OX=10116 GN=Aarsd1 PE=1 SV=1	0.000131306	0.000197976	1.44708e-06	6.29646e-05	2.13925e-06	6.89464e-05	0.346646	-1.30287	826	0.689096
sp|B2GUV7|IF2P_RAT	Eukaryotic translation initiation factor 5B OS=Rattus norvegicus OX=10116 GN=Eif5b PE=1 SV=1	0.000177954	0.000313027	0.000337374	0.000256001	0.000215807	0.000186881	0.34992	-0.33065	827	0.694763
sp|P48679|LMNA_RAT	Prelamin-A/C OS=Rattus norvegicus OX=10116 GN=Lmna PE=1 SV=1	0.0011389	0.00102213	0.000749107	0.00113128	0.000964625	0.00128147	0.350145	0.214814	828	0.69437
sp|P22985|XDH_RAT	Xanthine dehydrogenase/oxidase OS=Rattus norvegicus OX=10116 GN=Xdh PE=1 SV=3	6.09669e-05	2.151e-06	1.44708e-06	3.89804e-05	4.38136e-05	4.26836e-05	0.362621	0.958607	829	0.718243
sp|O35303|DNM1L_RAT	Dynamin-1-like protein OS=Rattus norvegicus OX=10116 GN=Dnm1l PE=1 SV=1	0.000107479	0.000108034	0.000116437	1.44039e-06	3.86198e-05	0.000150495	0.352961	-0.800759	830	0.698268
sp|Q64122|MYL9_RAT	Myosin regulatory light polypeptide 9 OS=Rattus norvegicus OX=10116 GN=Myl9 PE=1 SV=2	0.000474543	0.000317996	0.000342729	0.000455113	0.000341029	0.000830583	0.351988	0.518938	831	0.695504
sp|P63322|RALA_RAT	Ras-related protein Ral-A OS=Rattus norvegicus OX=10116 GN=Rala PE=1 SV=1	1.33575e-06	2.151e-06	0.000142249	0.000377788	0.000141544	1.17e-06	0.354692	1.83655	832	0.700005
sp|O35547|ACSL4_RAT	Long-chain-fatty-acid--CoA ligase 4 OS=Rattus norvegicus OX=10116 GN=Acsl4 PE=1 SV=2	0.000114131	7.648e-05	1.44708e-06	3.64858e-05	4.10098e-05	1.17e-06	0.34621	-1.28773	833	0.682444
sp|A2RUW1|TOLIP_RAT	Toll-interacting protein OS=Rattus norvegicus OX=10116 GN=Tollip PE=1 SV=1	0.000197438	0.000297686	0.000106946	0.000189353	0.000319248	0.000311014	0.354235	0.445016	834	0.697427
sp|Q63416|ITIH3_RAT	Inter-alpha-trypsin inhibitor heavy chain H3 OS=Rattus norvegicus OX=10116 GN=Itih3 PE=2 SV=1	1.33575e-06	9.19571e-05	1.44708e-06	5.84925e-05	6.57452e-05	6.40495e-05	0.361125	0.99089	835	0.71014
sp|Q6DGG1|ABHEB_RAT	Protein ABHD14B OS=Rattus norvegicus OX=10116 GN=Abhd14b PE=2 SV=1	0.000772827	0.000647349	0.000418619	0.000617653	0.000694238	0.00108213	0.355391	0.380676	836	0.698029
sp|P70483|STRN_RAT	Striatin OS=Rattus norvegicus OX=10116 GN=Strn PE=1 SV=1	6.93563e-05	0.000104572	7.51367e-05	6.65165e-05	7.47641e-05	7.28357e-05	0.356417	-0.218126	837	0.699208
sp|Q75Q41|TOM22_RAT	Mitochondrial import receptor subunit TOM22 homolog OS=Rattus norvegicus OX=10116 GN=Tomm22 PE=1 SV=1	0.000190486	2.151e-06	1.44708e-06	1.44039e-06	0.000410676	0.000200042	0.356598	1.65722	838	0.698728
sp|Q01986|MP2K1_RAT	Dual specificity mitogen-activated protein kinase kinase 1 OS=Rattus norvegicus OX=10116 GN=Map2k1 PE=1 SV=2	0.000137654	6.91823e-05	7.45631e-05	6.60087e-05	7.41933e-05	7.22797e-05	0.357682	-0.405279	839	0.700017
sp|P52555|ERP29_RAT	Endoplasmic reticulum resident protein 29 OS=Rattus norvegicus OX=10116 GN=Erp29 PE=1 SV=2	0.00208069	0.00198686	0.00191599	0.00199549	0.00134575	0.00196656	0.358348	-0.172881	840	0.700485
sp|P20761|IGG2B_RAT	Ig gamma-2B chain C region OS=Rattus norvegicus OX=10116 GN=Igh-1a PE=1 SV=1	1.33575e-06	2.151e-06	8.79979e-05	0.000233707	2.13925e-06	8.53031e-05	0.356874	1.81164	841	0.696775
sp|P55009|AIF1_RAT	Allograft inflammatory factor 1 OS=Rattus norvegicus OX=10116 GN=Aif1 PE=2 SV=1	0.000184007	0.000369913	1.44708e-06	0.000176472	2.13925e-06	1.17e-06	0.360282	-1.6272	842	0.702592
sp|P15865|H14_RAT	Histone H1.4 OS=Rattus norvegicus OX=10116 GN=H1-4 PE=1 SV=3	0.0011116	0.00136564	0.000936635	0.00118454	0.000798849	0.000907952	0.361886	-0.239672	843	0.704884
sp|P62804|H4_RAT	Histone H4 OS=Rattus norvegicus OX=10116 GN=H4c2 PE=1 SV=2	0.00183828	0.00184777	0.00113799	0.00176301	0.000849262	0.00110314	0.362329	-0.37672	844	0.704911
sp|P23457|DIDH_RAT	3-alpha-hydroxysteroid dehydrogenase OS=Rattus norvegicus OX=10116 GN=Akr1c9 PE=1 SV=1	0.00134405	0.00109768	0.00163807	0.00161127	0.00135829	0.00167613	0.36288	0.187394	845	0.705146
sp|P62198|PRS8_RAT	26S proteasome regulatory subunit 8 OS=Rattus norvegicus OX=10116 GN=Psmc5 PE=1 SV=1	0.000732854	0.000669671	0.000793932	0.00102232	0.000789995	0.000699654	0.363202	0.193641	846	0.704937
sp|O70377|SNP23_RAT	Synaptosomal-associated protein 23 OS=Rattus norvegicus OX=10116 GN=Snap23 PE=1 SV=1	0.000386414	2.151e-06	0.000697698	0.000494122	0.00055539	0.000676332	0.363636	0.66793	847	0.704947
sp|Q63942|RAB3D_RAT	GTP-binding protein Rab-3D OS=Rattus norvegicus OX=10116 GN=Rab3d PE=1 SV=2	1.33575e-06	0.000372447	0.000401415	0.000236908	0.000798849	0.000389122	0.363823	0.878203	848	0.704478
sp|P0C5H9|MANF_RAT	Mesencephalic astrocyte-derived neurotrophic factor OS=Rattus norvegicus OX=10116 GN=Manf PE=1 SV=1	0.00196445	0.00212649	0.00360152	0.00260863	0.00358366	0.00333254	0.364244	0.30825	849	0.704463
sp|Q920J4|TXNL1_RAT	Thioredoxin-like protein 1 OS=Rattus norvegicus OX=10116 GN=Txnl1 PE=1 SV=3	0.00037438	2.151e-06	1.44708e-06	0.000269288	0.000201785	0.000294871	0.366999	1.01894	850	0.708955
sp|P38659|PDIA4_RAT	Protein disulfide-isomerase A4 OS=Rattus norvegicus OX=10116 GN=Pdia4 PE=1 SV=2	0.00176681	0.00126852	0.00113932	0.00116999	0.00122436	0.00119278	0.365289	-0.218823	851	0.704823
sp|Q3T1K5|CAZA2_RAT	F-actin-capping protein subunit alpha-2 OS=Rattus norvegicus OX=10116 GN=Capza2 PE=1 SV=1	9.45768e-05	2.151e-06	1.44708e-06	0.000181409	2.13925e-06	9.93215e-05	0.365274	1.52671	852	0.703967
sp|Q499N5|ACSF2_RAT	Medium-chain acyl-CoA ligase ACSF2, mitochondrial OS=Rattus norvegicus OX=10116 GN=Acsf2 PE=2 SV=1	0.000395838	0.000309464	0.000381181	0.000253087	0.000331879	0.000369508	0.368562	-0.186888	853	0.709471
sp|P15083|PIGR_RAT	Polymeric immunoglobulin receptor OS=Rattus norvegicus OX=10116 GN=Pigr PE=1 SV=1	0.000527613	0.000530338	0.00053348	0.000472276	0.000682502	0.00062796	0.368746	0.163769	854	0.708994
sp|P07335|KCRB_RAT	Creatine kinase B-type OS=Rattus norvegicus OX=10116 GN=Ckb PE=1 SV=2	7.09947e-05	0.000142723	7.69116e-05	0.000136175	2.13925e-06	1.17e-06	0.373972	-1.05907	855	0.718201
sp|Q9EQS0|TALDO_RAT	Transaldolase OS=Rattus norvegicus OX=10116 GN=Taldo1 PE=1 SV=2	0.000481584	0.000161357	8.69534e-05	0.000153955	0.000173044	1.17e-06	0.370074	-1.15325	856	0.709886
sp|Q6MG48|PRC2A_RAT	Protein PRRC2A OS=Rattus norvegicus OX=10116 GN=Prrc2a PE=1 SV=1	2.50337e-05	2.151e-06	6.78003e-05	1.44039e-06	2.69856e-05	1.17e-06	0.3591	-1.6823	857	0.68803
sp|P04276|VTDB_RAT	Vitamin D-binding protein OS=Rattus norvegicus OX=10116 GN=Gc PE=1 SV=3	0.00102286	0.00102814	0.00141592	0.00136247	0.00171518	0.00107417	0.370466	0.26009	858	0.708981
sp|P50430|ARSB_RAT	Arylsulfatase B OS=Rattus norvegicus OX=10116 GN=Arsb PE=2 SV=2	0.000204916	0.000205975	0.000443989	0.000491315	0.000331341	0.000322795	0.372639	0.42212	859	0.712309
sp|P04800|CP3A1_RAT,sp|P51538|CP3A9_RAT	Cytochrome P450 3A1 OS=Rattus norvegicus OX=10116 GN=Cyp3a1 PE=1 SV=1,Cytochrome P450 3A9 OS=Rattus norvegicus OX=10116 GN=Cyp3a9 PE=2 SV=2	5.36686e-05	2.151e-06	1.44708e-06	1.44039e-06	2.13925e-06	1.17e-06	0.368665	-3.59181	860	0.703892
sp|P35281|RAB10_RAT,sp|P35286|RAB13_RAT,sp|P35289|RAB15_RAT,sp|Q5U316|RAB35_RAT	Ras-related protein Rab-10 OS=Rattus norvegicus OX=10116 GN=Rab10 PE=1 SV=1,Ras-related protein Rab-13 OS=Rattus norvegicus OX=10116 GN=Rab13 PE=1 SV=2,Ras-related protein Rab-15 OS=Rattus norvegicus OX=10116 GN=Rab15 PE=2 SV=1,Ras-related protein Rab-35 OS=Rattus norvegicus OX=10116 GN=Rab35 PE=1 SV=1	0.000135245	2.151e-06	1.44708e-06	1.44039e-06	2.13925e-06	1.17e-06	0.371836	-4.86949	861	0.709124
sp|Q6IFU7|K1C42_RAT,sp|Q6IFV1|K1C14_RAT,sp|Q6IFV4|K1C13_RAT,sp|Q6IFW2|K1C40_RAT,sp|Q6IFW6|K1C10_RAT,sp|Q6IFX1|K1C24_RAT	Keratin, type I cytoskeletal 42 OS=Rattus norvegicus OX=10116 GN=Krt42 PE=3 SV=1,Keratin, type I cytoskeletal 14 OS=Rattus norvegicus OX=10116 GN=Krt14 PE=2 SV=1,Keratin, type I cytoskeletal 13 OS=Rattus norvegicus OX=10116 GN=Krt13 PE=3 SV=1,Keratin, type I cytoskeletal 40 OS=Rattus norvegicus OX=10116 GN=Krt40 PE=3 SV=1,Keratin, type I cytoskeletal 10 OS=Rattus norvegicus OX=10116 GN=Krt10 PE=3…	5.98428e-05	2.151e-06	1.44708e-06	1.44039e-06	2.13925e-06	1.17e-06	0.36921	-3.73952	862	0.703298
sp|Q3B8Q2|IF4A3_RAT	Eukaryotic initiation factor 4A-III OS=Rattus norvegicus OX=10116 GN=Eif4a3 PE=1 SV=1	6.58126e-05	2.151e-06	1.44708e-06	1.44039e-06	2.13925e-06	1.17e-06	0.369639	-3.86927	863	0.7033
sp|Q3T1I4|PRRC1_RAT	Protein PRRC1 OS=Rattus norvegicus OX=10116 GN=Prrc1 PE=2 SV=1	0.000122117	2.151e-06	1.44708e-06	1.44039e-06	2.13925e-06	1.17e-06	0.371613	-4.7262	864	0.706238
sp|P15178|SYDC_RAT	Aspartate--tRNA ligase, cytoplasmic OS=Rattus norvegicus OX=10116 GN=Dars1 PE=1 SV=1	0.00010798	2.151e-06	1.44708e-06	1.44039e-06	2.13925e-06	1.17e-06	0.371312	-4.55409	865	0.70485
sp|Q5RJT2|SPB1_RAT	pre-rRNA 2'-O-ribose RNA methyltransferase FTSJ3 OS=Rattus norvegicus OX=10116 GN=Ftsj3 PE=1 SV=1	9.78853e-05	2.151e-06	1.44708e-06	1.44039e-06	2.13925e-06	1.17e-06	0.371044	-4.41728	866	0.703526
sp|Q3T1L0|A16A1_RAT	Aldehyde dehydrogenase family 16 member A1 OS=Rattus norvegicus OX=10116 GN=Aldh16a1 PE=2 SV=1	6.74538e-05	2.151e-06	1.44708e-06	1.44039e-06	2.13925e-06	1.17e-06	0.369744	-3.90298	867	0.700253
sp|Q5I0K8|RT07_RAT	28S ribosomal protein S7, mitochondrial OS=Rattus norvegicus OX=10116 GN=Mrps7 PE=2 SV=2	0.000335318	2.151e-06	1.44708e-06	1.44039e-06	2.13925e-06	1.17e-06	0.37307	-6.15696	868	0.705739
sp|Q9WVC7|AKAP6_RAT	A-kinase anchor protein 6 OS=Rattus norvegicus OX=10116 GN=Akap6 PE=1 SV=1	3.50678e-05	2.151e-06	1.44708e-06	1.44039e-06	2.13925e-06	1.17e-06	0.365844	-3.02517	869	0.691273
sp|Q66H61|SYQ_RAT	Glutamine--tRNA ligase OS=Rattus norvegicus OX=10116 GN=Qars1 PE=1 SV=1	6.98038e-05	2.151e-06	1.44708e-06	1.44039e-06	2.13925e-06	1.17e-06	0.369885	-3.94993	870	0.698105
sp|D3ZW55|ITPA_RAT	Inosine triphosphate pyrophosphatase OS=Rattus norvegicus OX=10116 GN=Itpa PE=3 SV=1	0.000273222	2.151e-06	1.44708e-06	1.44039e-06	2.13925e-06	1.17e-06	0.372881	-5.86499	871	0.702952
sp|P62864|RS30_RAT	40S ribosomal protein S30 OS=Rattus norvegicus OX=10116 GN=Fau PE=1 SV=1	0.000916914	2.151e-06	1.44708e-06	1.44039e-06	2.13925e-06	1.17e-06	0.373598	-7.59847	872	0.703495
sp|Q9JIL8|RAD50_RAT	DNA repair protein RAD50 OS=Rattus norvegicus OX=10116 GN=Rad50 PE=1 SV=1	2.06166e-05	2.151e-06	1.44708e-06	1.44039e-06	2.13925e-06	1.17e-06	0.36006	-2.34999	873	0.677227
sp|Q9R066|CXAR_RAT	Coxsackievirus and adenovirus receptor homolog OS=Rattus norvegicus OX=10116 GN=Cxadr PE=1 SV=2	7.41067e-05	2.151e-06	1.44708e-06	1.44039e-06	2.13925e-06	1.17e-06	0.37012	-4.03211	874	0.695351
sp|Q7TQ94|NIT1_RAT	Deaminated glutathione amidase OS=Rattus norvegicus OX=10116 GN=Nit1 PE=2 SV=2	0.000165437	2.151e-06	1.44708e-06	1.44039e-06	2.13925e-06	1.17e-06	0.372215	-5.15336	875	0.698487
sp|Q5XIG8|STRAP_RAT	Serine-threonine kinase receptor-associated protein OS=Rattus norvegicus OX=10116 GN=Strap PE=1 SV=1	7.72827e-05	2.151e-06	1.44708e-06	1.44039e-06	2.13925e-06	1.17e-06	0.370276	-4.08991	876	0.694057
sp|Q66H39|ABCF3_RAT	ATP-binding cassette sub-family F member 3 OS=Rattus norvegicus OX=10116 GN=Abcf3 PE=2 SV=1	7.63017e-05	2.151e-06	1.44708e-06	1.44039e-06	2.13925e-06	1.17e-06	0.370229	-4.0723	877	0.693178
sp|D4A0X3|K1107_RAT	AP2-interacting clathrin-endocytosis protein OS=Rattus norvegicus OX=10116 GN=Kiaa1107 PE=1 SV=3	6.55997e-05	2.151e-06	1.44708e-06	1.44039e-06	2.13925e-06	1.17e-06	0.369625	-3.86484	878	0.691258
sp|B2GUZ5|CAZA1_RAT	F-actin-capping protein subunit alpha-1 OS=Rattus norvegicus OX=10116 GN=Capza1 PE=1 SV=1	0.000189154	2.151e-06	1.44708e-06	1.44039e-06	2.13925e-06	1.17e-06	0.372427	-5.34278	879	0.695705
sp|Q9QXU8|DC1L1_RAT	Cytoplasmic dynein 1 light intermediate chain 1 OS=Rattus norvegicus OX=10116 GN=Dync1li1 PE=1 SV=1	0.000103438	2.151e-06	1.44708e-06	1.44039e-06	2.13925e-06	1.17e-06	0.371198	-4.49413	880	0.692622
sp|Q5PPJ4|DOHH_RAT	Deoxyhypusine hydroxylase OS=Rattus norvegicus OX=10116 GN=Dohh PE=2 SV=1	8.95661e-05	2.151e-06	1.44708e-06	1.44039e-06	2.13925e-06	1.17e-06	0.370777	-4.29389	881	0.69105
sp|Q9Z2M4|DECR2_RAT	Peroxisomal 2,4-dienoyl-CoA reductase [(3E)-enoyl-CoA-producing] OS=Rattus norvegicus OX=10116 GN=Decr2 PE=1 SV=1	0.000185267	2.151e-06	1.44708e-06	1.44039e-06	2.13925e-06	1.17e-06	0.372396	-5.31339	882	0.693281
sp|Q6AYA1|GAR1_RAT	H/ACA ribonucleoprotein complex subunit 1 OS=Rattus norvegicus OX=10116 GN=Gar1 PE=2 SV=1	0.000239371	2.151e-06	1.44708e-06	1.44039e-06	2.13925e-06	1.17e-06	0.372737	-5.67681	883	0.69313
sp|P84245|H33_RAT,sp|Q6LED0|H31_RAT	Histone H3.3 OS=Rattus norvegicus OX=10116 GN=H3-3b PE=1 SV=2,Histone H3.1 OS=Rattus norvegicus OX=10116 PE=1 SV=3	0.000397779	2.151e-06	1.44708e-06	1.44039e-06	2.13925e-06	1.17e-06	0.373201	-6.401	884	0.693208
sp|Q4V8D9|LRC34_RAT	Leucine-rich repeat-containing protein 34 OS=Rattus norvegicus OX=10116 GN=Lrrc34 PE=2 SV=1	6.51782e-05	2.151e-06	1.44708e-06	1.44039e-06	2.13925e-06	1.17e-06	0.369597	-3.85602	885	0.685739
sp|Q9EPF2|MUC18_RAT	Cell surface glycoprotein MUC18 OS=Rattus norvegicus OX=10116 GN=Mcam PE=1 SV=2	4.17422e-05	2.151e-06	1.44708e-06	1.44039e-06	2.13925e-06	1.17e-06	0.367149	-3.2549	886	0.680427
sp|O08730|GLYG_RAT	Glycogenin-1 OS=Rattus norvegicus OX=10116 GN=Gyg1 PE=2 SV=4	1.33575e-06	0.00032659	1.44708e-06	1.44039e-06	2.13925e-06	1.17e-06	0.374663	-6.11576	887	0.69357
sp|B3GNI6|SEP11_RAT	Septin-11 OS=Rattus norvegicus OX=10116 GN=Septin11 PE=1 SV=1	1.33575e-06	0.000252331	1.44708e-06	1.44039e-06	2.13925e-06	1.17e-06	0.374889	-5.74718	888	0.693207
sp|P62142|PP1B_RAT,sp|P63088|PP1G_RAT	Serine/threonine-protein phosphatase PP1-beta catalytic subunit OS=Rattus norvegicus OX=10116 GN=Ppp1cb PE=1 SV=3,Serine/threonine-protein phosphatase PP1-gamma catalytic subunit OS=Rattus norvegicus OX=10116 GN=Ppp1cc PE=1 SV=1	1.33575e-06	0.00058202	1.44708e-06	1.44039e-06	2.13925e-06	1.17e-06	0.374327	-6.94399	889	0.691389
sp|O70142|SHC2_RAT	SHC-transforming protein 2 OS=Rattus norvegicus OX=10116 GN=Shc2 PE=2 SV=2	1.33575e-06	4.74496e-05	1.44708e-06	1.44039e-06	2.13925e-06	1.17e-06	0.379375	-3.40273	890	0.699925
sp|P08644|RASK_RAT,sp|Q04970|RASN_RAT	GTPase KRas OS=Rattus norvegicus OX=10116 GN=Kras PE=1 SV=3,GTPase NRas OS=Rattus norvegicus OX=10116 GN=Nras PE=1 SV=1	1.33575e-06	0.000575421	1.44708e-06	1.44039e-06	2.13925e-06	1.17e-06	0.374332	-6.92762	891	0.689846
sp|Q08877|DYN3_RAT	Dynamin-3 OS=Rattus norvegicus OX=10116 GN=Dnm3 PE=1 SV=2	1.33575e-06	3.12873e-05	1.44708e-06	1.44039e-06	2.13925e-06	1.17e-06	0.382426	-2.84262	892	0.703973
sp|O88637|PCY2_RAT	Ethanolamine-phosphate cytidylyltransferase OS=Rattus norvegicus OX=10116 GN=Pcyt2 PE=1 SV=1	1.33575e-06	0.000201896	1.44708e-06	1.44039e-06	2.13925e-06	1.17e-06	0.375139	-5.4294	893	0.689785
sp|Q6LED0|H31_RAT	Histone H3.1 OS=Rattus norvegicus OX=10116 PE=1 SV=3	1.33575e-06	0.000599749	1.44708e-06	1.44039e-06	2.13925e-06	1.17e-06	0.374314	-6.98708	894	0.687499
sp|Q75UQ2|CFDP1_RAT	Craniofacial development protein 1 OS=Rattus norvegicus OX=10116 GN=Cfdp1 PE=1 SV=1	1.33575e-06	0.00018433	1.44708e-06	1.44039e-06	2.13925e-06	1.17e-06	0.375258	-5.29994	895	0.688463
sp|P55260|ANXA4_RAT	Annexin A4 OS=Rattus norvegicus OX=10116 GN=Anxa4 PE=1 SV=3	1.33575e-06	8.52308e-05	1.44708e-06	1.44039e-06	2.13925e-06	1.17e-06	0.376881	-4.21184	896	0.690668
sp|O55096|DPP3_RAT	Dipeptidyl peptidase 3 OS=Rattus norvegicus OX=10116 GN=Dpp3 PE=1 SV=2	1.33575e-06	3.6841e-05	1.44708e-06	1.44039e-06	2.13925e-06	1.17e-06	0.381056	-3.06048	897	0.697541
sp|Q642A5|DPOE3_RAT	DNA polymerase epsilon subunit 3 OS=Rattus norvegicus OX=10116 GN=Pole3 PE=1 SV=1	1.33575e-06	0.000187508	1.44708e-06	1.44039e-06	2.13925e-06	1.17e-06	0.375235	-5.32424	898	0.68612
sp|Q5XHY5|SYTC_RAT	Threonine--tRNA ligase 1, cytoplasmic OS=Rattus norvegicus OX=10116 GN=Tars1 PE=1 SV=1	1.33575e-06	0.000117361	1.44708e-06	1.44039e-06	2.13925e-06	1.17e-06	0.376049	-4.6608	899	0.686843
sp|P06766|DPOLB_RAT	DNA polymerase beta OS=Rattus norvegicus OX=10116 GN=Polb PE=1 SV=4	1.33575e-06	8.11601e-05	1.44708e-06	1.44039e-06	2.13925e-06	1.17e-06	0.377035	-4.14352	900	0.687879
sp|Q68FR7|LTV1_RAT	Protein LTV1 homolog OS=Rattus norvegicus OX=10116 GN=Ltv1 PE=2 SV=1	1.33575e-06	5.78482e-05	1.44708e-06	1.44039e-06	2.13925e-06	1.17e-06	0.37835	-3.67417	901	0.689513
sp|Q07936|ANXA2_RAT	Annexin A2 OS=Rattus norvegicus OX=10116 GN=Anxa2 PE=1 SV=2	1.33575e-06	0.000160405	1.44708e-06	1.44039e-06	2.13925e-06	1.17e-06	0.375464	-5.10257	902	0.683494
sp|Q66H43|BORC6_RAT	BLOC-1-related complex subunit 6 OS=Rattus norvegicus OX=10116 GN=Borcs6 PE=2 SV=2	1.33575e-06	7.5524e-05	1.44708e-06	1.44039e-06	2.13925e-06	1.17e-06	0.377276	-4.04325	903	0.686032
sp|Q9ER24|ATX10_RAT	Ataxin-10 OS=Rattus norvegicus OX=10116 GN=Atxn10 PE=1 SV=1	1.33575e-06	5.72392e-05	1.44708e-06	1.44039e-06	2.13925e-06	1.17e-06	0.378399	-3.6596	904	0.687314
sp|Q4V7F5|PIHD1_RAT	PIH1 domain-containing protein 1 OS=Rattus norvegicus OX=10116 GN=Pih1d1 PE=1 SV=1	1.33575e-06	9.37539e-05	1.44708e-06	1.44039e-06	2.13925e-06	1.17e-06	0.376603	-4.34519	905	0.683295
sp|P86252|PURA_RAT	Transcriptional activator protein Pur-alpha (Fragments) OS=Rattus norvegicus OX=10116 GN=Pura PE=1 SV=1	1.33575e-06	0.000394038	1.44708e-06	1.44039e-06	2.13925e-06	1.17e-06	0.374532	-6.38453	906	0.678787
sp|D4AAZ6|RL37A_RAT,sp|P61515|RL37P_RAT	60S ribosomal protein L37a OS=Rattus norvegicus OX=10116 GN=Rpl37a PE=1 SV=1,Putative 60S ribosomal protein L37a OS=Rattus norvegicus OX=10116 GN=Rpl37a-ps1 PE=5 SV=2	1.33575e-06	0.00037762	1.44708e-06	1.44039e-06	2.13925e-06	1.17e-06	0.374559	-6.32357	907	0.678088
sp|Q8R511|FNBP1_RAT	Formin-binding protein 1 OS=Rattus norvegicus OX=10116 GN=Fnbp1 PE=1 SV=2	1.33575e-06	0.000132412	1.44708e-06	1.44039e-06	2.13925e-06	1.17e-06	0.3758	-4.83108	908	0.679586
sp|Q04462|SYVC_RAT	Valine--tRNA ligase OS=Rattus norvegicus OX=10116 GN=Vars1 PE=2 SV=2	1.33575e-06	2.151e-05	1.44708e-06	1.44039e-06	2.13925e-06	1.17e-06	0.386758	-2.35464	909	0.698633
sp|Q68FR2|BIN2_RAT	Bridging integrator 2 OS=Rattus norvegicus OX=10116 GN=Bin2 PE=1 SV=1	1.33575e-06	5.36265e-05	1.44708e-06	1.44039e-06	2.13925e-06	1.17e-06	0.378716	-3.57004	910	0.683354
sp|Q8VIL3|ZWINT_RAT	ZW10 interactor OS=Rattus norvegicus OX=10116 GN=Zwint PE=1 SV=1	1.33575e-06	0.000102213	1.44708e-06	1.44039e-06	2.13925e-06	1.17e-06	0.376374	-4.46637	911	0.678382
sp|Q9Z2X5|HOME3_RAT	Homer protein homolog 3 OS=Rattus norvegicus OX=10116 GN=Homer3 PE=1 SV=2	1.33575e-06	0.000151892	1.44708e-06	1.44039e-06	2.13925e-06	1.17e-06	0.375553	-5.02527	912	0.67616
sp|Q5XIG0|NUDT9_RAT	ADP-ribose pyrophosphatase, mitochondrial OS=Rattus norvegicus OX=10116 GN=Nudt9 PE=2 SV=1	1.33575e-06	7.76818e-05	1.44708e-06	1.44039e-06	2.13925e-06	1.17e-06	0.377179	-4.08247	913	0.678344
sp|P35745|ACYP2_RAT	Acylphosphatase-2 OS=Rattus norvegicus OX=10116 GN=Acyp2 PE=1 SV=2	1.33575e-06	0.000280295	1.44708e-06	1.44039e-06	2.13925e-06	1.17e-06	0.37479	-5.89724	914	0.673309
sp|P21670|PSA4_RAT	Proteasome subunit alpha type-4 OS=Rattus norvegicus OX=10116 GN=Psma4 PE=1 SV=1	1.33575e-06	0.000104171	1.44708e-06	1.44039e-06	2.13925e-06	1.17e-06	0.376327	-4.49303	915	0.675332
sp|P21213|HUTH_RAT	Histidine ammonia-lyase OS=Rattus norvegicus OX=10116 GN=Hal PE=1 SV=1	1.33575e-06	8.2766e-05	1.44708e-06	1.44039e-06	2.13925e-06	1.17e-06	0.376972	-4.17086	916	0.675751
sp|Q99PD2|RN138_RAT	E3 ubiquitin-protein ligase RNF138 OS=Rattus norvegicus OX=10116 GN=Rnf138 PE=2 SV=1	1.33575e-06	0.000130089	1.44708e-06	1.44039e-06	2.13925e-06	1.17e-06	0.375835	-4.80608	917	0.672978
sp|Q9Z1Z9|PDLI7_RAT	PDZ and LIM domain protein 7 OS=Rattus norvegicus OX=10116 GN=Pdlim7 PE=1 SV=1	1.33575e-06	0.000118987	1.44708e-06	1.44039e-06	2.13925e-06	1.17e-06	0.376019	-4.6802	918	0.672574
sp|P19468|GSH1_RAT	Glutamate--cysteine ligase catalytic subunit OS=Rattus norvegicus OX=10116 GN=Gclc PE=1 SV=2	1.33575e-06	4.26823e-05	1.44708e-06	1.44039e-06	2.13925e-06	1.17e-06	0.380021	-3.25887	919	0.678993
sp|Q4QRB2|SYF2_RAT	Pre-mRNA-splicing factor SYF2 OS=Rattus norvegicus OX=10116 GN=Syf2 PE=2 SV=1	1.33575e-06	0.00011235	1.44708e-06	1.44039e-06	2.13925e-06	1.17e-06	0.376146	-4.59933	920	0.671339
sp|A4L9P7|PDS5A_RAT	Sister chromatid cohesion protein PDS5 homolog A OS=Rattus norvegicus OX=10116 GN=Pds5a PE=1 SV=1	1.33575e-06	2.151e-06	6.59489e-05	1.44039e-06	2.13925e-06	1.17e-06	0.370765	-3.86979	921	0.661017
sp|Q5BK07|CCD43_RAT	Coiled-coil domain-containing protein 43 OS=Rattus norvegicus OX=10116 GN=Ccdc43 PE=1 SV=2	1.33575e-06	2.151e-06	0.000263994	1.44039e-06	2.13925e-06	1.17e-06	0.373119	-5.81547	922	0.664492
sp|Q811X6|CRYL1_RAT	Lambda-crystallin homolog OS=Rattus norvegicus OX=10116 GN=Cryl1 PE=1 SV=3	1.33575e-06	2.151e-06	0.00018372	1.44039e-06	2.13925e-06	1.17e-06	0.372777	-5.30067	923	0.663163
sp|Q9JIL9|NBN_RAT	Nibrin OS=Rattus norvegicus OX=10116 GN=Nbn PE=1 SV=2	1.33575e-06	2.151e-06	0.000117213	1.44039e-06	2.13925e-06	1.17e-06	0.372138	-4.66746	924	0.661311
sp|Q9JLT6|BID_RAT	BH3-interacting domain death agonist OS=Rattus norvegicus OX=10116 GN=Bid PE=1 SV=2	1.33575e-06	2.151e-06	0.000598027	1.44039e-06	2.13925e-06	1.17e-06	0.373556	-6.98463	925	0.663112
sp|P21575|DYN1_RAT,sp|Q08877|DYN3_RAT	Dynamin-1 OS=Rattus norvegicus OX=10116 GN=Dnm1 PE=1 SV=2,Dynamin-3 OS=Rattus norvegicus OX=10116 GN=Dnm3 PE=1 SV=2	1.33575e-06	2.151e-06	3.39159e-05	1.44039e-06	2.13925e-06	1.17e-06	0.367796	-2.97725	926	0.652182
sp|P63088|PP1G_RAT	Serine/threonine-protein phosphatase PP1-gamma catalytic subunit OS=Rattus norvegicus OX=10116 GN=Ppp1cc PE=1 SV=1	1.33575e-06	2.151e-06	0.000544334	1.44039e-06	2.13925e-06	1.17e-06	0.373522	-6.84974	927	0.661621
sp|P62142|PP1B_RAT	Serine/threonine-protein phosphatase PP1-beta catalytic subunit OS=Rattus norvegicus OX=10116 GN=Ppp1cb PE=1 SV=3	1.33575e-06	2.151e-06	0.000448063	1.44039e-06	2.13925e-06	1.17e-06	0.37344	-6.57092	928	0.660764
sp|P05714|RAB4A_RAT,sp|P35281|RAB10_RAT,sp|P35284|RAB12_RAT,sp|P35289|RAB15_RAT,sp|P51146|RAB4B_RAT,sp|P51156|RAB26_RAT,sp|P62824|RAB3C_RAT,sp|P63012|RAB3A_RAT,sp|Q53B90|RAB43_RAT,sp|Q5U316|RAB35_RAT,sp|Q63941|RAB3B_RAT,sp|Q9WVB1|RAB6A_RAT	Ras-related protein Rab-4A OS=Rattus norvegicus OX=10116 GN=Rab4a PE=1 SV=3,Ras-related protein Rab-10 OS=Rattus norvegicus OX=10116 GN=Rab10 PE=1 SV=1,Ras-related protein Rab-12 OS=Rattus norvegicus OX=10116 GN=Rab12 PE=1 SV=2,Ras-related protein Rab-15 OS=Rattus norvegicus OX=10116 GN=Rab15 PE=2 SV=1,Ras-related protein Rab-4B OS=Rattus norvegicus OX=10116 GN=Rab4b PE=2 SV=1,Ras-related protein…	1.33575e-06	2.151e-06	0.000134419	1.44039e-06	2.13925e-06	1.17e-06	0.372364	-4.85972	929	0.658151
sp|O35760|IDI1_RAT	Isopentenyl-diphosphate Delta-isomerase 1 OS=Rattus norvegicus OX=10116 GN=Idi1 PE=2 SV=2	1.33575e-06	2.151e-06	0.000387268	1.44039e-06	2.13925e-06	1.17e-06	0.373368	-6.3623	930	0.659215
sp|Q99PM1|TOX4_RAT	TOX high mobility group box family member 4 OS=Rattus norvegicus OX=10116 GN=Tox4 PE=1 SV=1	1.33575e-06	2.151e-06	9.46795e-05	1.44039e-06	2.13925e-06	1.17e-06	0.371718	-4.36934	931	0.655597
sp|B7SBD2|TOX3_RAT	TOX high mobility group box family member 3 OS=Rattus norvegicus OX=10116 GN=Tox3 PE=1 SV=1	1.33575e-06	2.151e-06	5.07856e-05	1.44039e-06	2.13925e-06	1.17e-06	0.369827	-3.51433	932	0.651562
sp|O55000|PP1RA_RAT	Serine/threonine-protein phosphatase 1 regulatory subunit 10 OS=Rattus norvegicus OX=10116 GN=Ppp1r10 PE=1 SV=1	1.33575e-06	2.151e-06	6.72094e-05	1.44039e-06	2.13925e-06	1.17e-06	0.370824	-3.89574	933	0.652619
sp|Q5PQN6|SPE39_RAT	Spermatogenesis-defective protein 39 homolog OS=Rattus norvegicus OX=10116 GN=Vipas39 PE=1 SV=1	1.33575e-06	2.151e-06	0.000127406	1.44039e-06	2.13925e-06	1.17e-06	0.372279	-4.78442	934	0.654479
sp|Q63358|MYO9B_RAT	Unconventional myosin-IXb OS=Rattus norvegicus OX=10116 GN=Myo9b PE=1 SV=1	1.33575e-06	2.151e-06	4.43989e-05	1.44039e-06	2.13925e-06	1.17e-06	0.369239	-3.3337	935	0.64844
sp|Q920Q0|PALM_RAT	Paralemmin-1 OS=Rattus norvegicus OX=10116 GN=Palm PE=1 SV=1	1.33575e-06	2.151e-06	0.00015302	1.44039e-06	2.13925e-06	1.17e-06	0.372551	-5.04226	936	0.653557
sp|Q3MHS2|ZN830_RAT	Zinc finger protein 830 OS=Rattus norvegicus OX=10116 GN=Znf830 PE=1 SV=1	1.33575e-06	2.151e-06	0.000237594	1.44039e-06	2.13925e-06	1.17e-06	0.373032	-5.66556	937	0.653702
sp|Q80Z36|ZHX3_RAT	Zinc fingers and homeoboxes protein 3 OS=Rattus norvegicus OX=10116 GN=Zhx3 PE=1 SV=2	1.33575e-06	2.151e-06	6.16263e-05	1.44039e-06	2.13925e-06	1.17e-06	0.370545	-3.77706	938	0.648651
sp|P22288|GCH1_RAT	GTP cyclohydrolase 1 OS=Rattus norvegicus OX=10116 GN=Gch1 PE=1 SV=1	1.33575e-06	2.151e-06	0.000243181	1.44039e-06	2.13925e-06	1.17e-06	0.373052	-5.69861	939	0.652344
sp|Q6DGF4|ZFAN6_RAT	AN1-type zinc finger protein 6 OS=Rattus norvegicus OX=10116 GN=Zfand6 PE=1 SV=1	1.33575e-06	2.151e-06	0.00026281	1.44039e-06	2.13925e-06	1.17e-06	0.373115	-5.80907	940	0.651761
sp|Q3KRC4|GPC5C_RAT	G-protein coupled receptor family C group 5 member C OS=Rattus norvegicus OX=10116 GN=Gprc5c PE=1 SV=2	1.33575e-06	2.151e-06	6.64474e-05	1.44039e-06	2.13925e-06	1.17e-06	0.370789	-3.88011	941	0.647009
sp|Q6TRW4|PDS5B_RAT	Sister chromatid cohesion protein PDS5 homolog B OS=Rattus norvegicus OX=10116 GN=Pds5b PE=1 SV=2	1.33575e-06	2.151e-06	8.10043e-05	1.44039e-06	2.13925e-06	1.17e-06	0.371349	-4.15291	942	0.647298
sp|Q8CF97|VCIP1_RAT	Deubiquitinating protein VCPIP1 OS=Rattus norvegicus OX=10116 GN=Vcpip1 PE=1 SV=2	1.33575e-06	2.151e-06	7.19983e-05	1.44039e-06	2.13925e-06	1.17e-06	0.371029	-3.9903	943	0.646055
sp|Q3MIB4|LONP2_RAT	Lon protease homolog 2, peroxisomal OS=Rattus norvegicus OX=10116 GN=Lonp2 PE=1 SV=2	1.33575e-06	2.151e-06	0.000103181	1.44039e-06	2.13925e-06	1.17e-06	0.371898	-4.48916	944	0.646882
sp|D3ZUI5|COBL_RAT	Protein cordon-bleu OS=Rattus norvegicus OX=10116 GN=Cobl PE=1 SV=1	1.33575e-06	2.151e-06	2.58635e-05	1.44039e-06	2.13925e-06	1.17e-06	0.365894	-2.62748	945	0.635765
sp|Q5BJN8|SDE2_RAT	Replication stress response regulator SDE2 OS=Rattus norvegicus OX=10116 GN=Sde2 PE=1 SV=2	1.33575e-06	2.151e-06	6.54092e-05	1.44039e-06	2.13925e-06	1.17e-06	0.370739	-3.85853	946	0.643503
sp|Q9Z1Z3|EPN2_RAT	Epsin-2 OS=Rattus norvegicus OX=10116 GN=Epn2 PE=1 SV=1	1.33575e-06	2.151e-06	0.000100526	1.44039e-06	2.13925e-06	1.17e-06	0.371845	-4.4528	947	0.644741
sp|P62501|T22D1_RAT	TSC22 domain family protein 1 OS=Rattus norvegicus OX=10116 GN=Tsc22d1 PE=2 SV=1	1.33575e-06	2.151e-06	0.000409836	1.44039e-06	2.13925e-06	1.17e-06	0.373397	-6.44331	948	0.646749
sp|Q9Z221|PMFBP_RAT	Polyamine-modulated factor 1-binding protein 1 OS=Rattus norvegicus OX=10116 GN=Pmfbp1 PE=2 SV=2	1.33575e-06	2.151e-06	6.0357e-05	1.44039e-06	2.13925e-06	1.17e-06	0.370474	-3.74865	949	0.64101
sp|Q9ES53|UFD1_RAT	Ubiquitin recognition factor in ER-associated degradation protein 1 OS=Rattus norvegicus OX=10116 GN=Ufd1 PE=1 SV=1	1.33575e-06	2.151e-06	0.000190901	1.44039e-06	2.13925e-06	1.17e-06	0.372819	-5.35498	950	0.644389
sp|F1LNI5|PPM1G_RAT	Protein phosphatase 1G OS=Rattus norvegicus OX=10116 GN=Ppm1g PE=1 SV=2	1.33575e-06	2.151e-06	5.40651e-05	1.44039e-06	2.13925e-06	1.17e-06	0.370074	-3.59897	951	0.638972
sp|O35820|DNPH1_RAT	2'-deoxynucleoside 5'-phosphate N-hydrolase 1 OS=Rattus norvegicus OX=10116 GN=Dnph1 PE=1 SV=1	1.33575e-06	2.151e-06	0.000179775	1.44039e-06	2.13925e-06	1.17e-06	0.372752	-5.26994	952	0.642919
sp|P15473|IBP3_RAT	Insulin-like growth factor-binding protein 3 OS=Rattus norvegicus OX=10116 GN=Igfbp3 PE=1 SV=2	1.33575e-06	2.151e-06	0.000100354	1.44039e-06	2.13925e-06	1.17e-06	0.371842	-4.45041	953	0.640676
sp|P26260|SDC1_RAT	Syndecan-1 OS=Rattus norvegicus OX=10116 GN=Sdc1 PE=1 SV=2	1.33575e-06	2.151e-06	0.000187242	1.44039e-06	2.13925e-06	1.17e-06	0.372798	-5.32756	954	0.64165
sp|P31394|PROC_RAT	Vitamin K-dependent protein C OS=Rattus norvegicus OX=10116 GN=Proc PE=2 SV=1	1.33575e-06	2.151e-06	6.35647e-05	1.44039e-06	2.13925e-06	1.17e-06	0.370647	-3.81938	955	0.63728
sp|P83883|RL36A_RAT	60S ribosomal protein L36a OS=Rattus norvegicus OX=10116 GN=Rpl36a PE=1 SV=2	1.33575e-06	2.151e-06	0.000276446	1.44039e-06	2.13925e-06	1.17e-06	0.373154	-5.88112	956	0.64092
sp|Q4V7A6|PHF10_RAT	PHD finger protein 10 OS=Rattus norvegicus OX=10116 GN=Phf10 PE=1 SV=2	1.33575e-06	2.151e-06	5.89604e-05	1.44039e-06	2.13925e-06	1.17e-06	0.370393	-3.71674	957	0.635512
sp|Q63627|SCAF4_RAT	SR-related and CTD-associated factor 4 OS=Rattus norvegicus OX=10116 GN=Scaf4 PE=1 SV=2	1.33575e-06	2.151e-06	4.88388e-05	1.44039e-06	2.13925e-06	1.17e-06	0.369664	-3.46163	958	0.633599
sp|Q6AYU3|DNJB6_RAT	DnaJ homolog subfamily B member 6 OS=Rattus norvegicus OX=10116 GN=Dnajb6 PE=1 SV=1	1.33575e-06	2.151e-06	8.20821e-05	1.44039e-06	2.13925e-06	1.17e-06	0.371382	-4.1712	959	0.635881
sp|Q9QYM2|PARG_RAT	Poly(ADP-ribose) glycohydrolase OS=Rattus norvegicus OX=10116 GN=Parg PE=1 SV=1	1.33575e-06	2.151e-06	3.01474e-05	1.44039e-06	2.13925e-06	1.17e-06	0.367032	-2.82404	960	0.627777
sp|O88902|PTN23_RAT	Tyrosine-protein phosphatase non-receptor type 23 (Fragment) OS=Rattus norvegicus OX=10116 GN=Ptpn23 PE=1 SV=2	1.33575e-06	2.151e-06	3.90971e-05	1.44039e-06	2.13925e-06	1.17e-06	0.368606	-3.16442	961	0.629814
sp|Q99J82|ILK_RAT	Integrin-linked protein kinase OS=Rattus norvegicus OX=10116 GN=Ilk PE=2 SV=1	1.33575e-06	2.151e-06	6.48303e-05	1.44039e-06	2.13925e-06	1.17e-06	0.370711	-3.84636	962	0.632752
sp|Q9QY16|DDX25_RAT	ATP-dependent RNA helicase DDX25 OS=Rattus norvegicus OX=10116 GN=Ddx25 PE=1 SV=2	1.33575e-06	2.151e-06	6.06694e-05	1.44039e-06	2.13925e-06	1.17e-06	0.370492	-3.7557	963	0.631721
sp|Q9Z2G8|NP1L1_RAT	Nucleosome assembly protein 1-like 1 OS=Rattus norvegicus OX=10116 GN=Nap1l1 PE=1 SV=1	1.33575e-06	2.151e-06	7.51367e-05	1.44039e-06	2.13925e-06	1.17e-06	0.371149	-4.04907	964	0.632186
sp|P51583|PUR6_RAT	Multifunctional protein ADE2 OS=Rattus norvegicus OX=10116 GN=Paics PE=1 SV=3	1.33575e-06	2.151e-06	0.000137898	1.44039e-06	2.13925e-06	1.17e-06	0.372403	-4.89566	965	0.633664
sp|Q63068|PHAX_RAT	Phosphorylated adapter RNA export protein OS=Rattus norvegicus OX=10116 GN=Phax PE=1 SV=2	1.33575e-06	2.151e-06	7.61125e-05	1.44039e-06	2.13925e-06	1.17e-06	0.371185	-4.06686	966	0.630937
sp|Q8R431|MGLL_RAT	Monoglyceride lipase OS=Rattus norvegicus OX=10116 GN=Mgll PE=1 SV=1	1.33575e-06	2.151e-06	9.67106e-05	1.44039e-06	2.13925e-06	1.17e-06	0.371764	-4.39888	967	0.631268
sp|Q5U2M6|DCAF8_RAT	DDB1- and CUL4-associated factor 8 OS=Rattus norvegicus OX=10116 GN=Dcaf8 PE=1 SV=1	1.33575e-06	2.151e-06	4.95826e-05	1.44039e-06	2.13925e-06	1.17e-06	0.369728	-3.48199	968	0.627162
sp|Q7TP98|ILF2_RAT	Interleukin enhancer-binding factor 2 OS=Rattus norvegicus OX=10116 GN=Ilf2 PE=2 SV=1	1.33575e-06	2.151e-06	6.32901e-05	1.44039e-06	2.13925e-06	1.17e-06	0.370633	-3.81346	969	0.628049
sp|Q498U4|SARNP_RAT	SAP domain-containing ribonucleoprotein OS=Rattus norvegicus OX=10116 GN=Sarnp PE=1 SV=3	1.33575e-06	2.151e-06	0.000279079	1.44039e-06	2.13925e-06	1.17e-06	0.373161	-5.89462	970	0.631681
sp|P40329|SYRC_RAT	Arginine--tRNA ligase, cytoplasmic OS=Rattus norvegicus OX=10116 GN=Rars1 PE=1 SV=2	1.33575e-06	2.151e-06	4.43989e-05	1.44039e-06	2.13925e-06	1.17e-06	0.369239	-3.3337	971	0.624399
sp|O35274|NEB2_RAT	Neurabin-2 OS=Rattus norvegicus OX=10116 GN=Ppp1r9b PE=1 SV=1	1.33575e-06	2.151e-06	7.17339e-05	1.44039e-06	2.13925e-06	1.17e-06	0.371018	-3.98524	972	0.626762
sp|P70712|KYNU_RAT	Kynureninase OS=Rattus norvegicus OX=10116 GN=Kynu PE=1 SV=2	1.33575e-06	2.151e-06	6.31537e-05	1.44039e-06	2.13925e-06	1.17e-06	0.370626	-3.81051	973	0.625455
sp|P27615|SCRB2_RAT	Lysosome membrane protein 2 OS=Rattus norvegicus OX=10116 GN=Scarb2 PE=1 SV=2	1.33575e-06	2.151e-06	0.000122608	1.44039e-06	2.13925e-06	1.17e-06	0.372216	-4.73055	974	0.627493
sp|Q7TP65|ANKL2_RAT	Ankyrin repeat and LEM domain-containing protein 2 OS=Rattus norvegicus OX=10116 GN=Ankle2 PE=2 SV=2	1.33575e-06	2.151e-06	3.03976e-05	1.44039e-06	2.13925e-06	1.17e-06	0.367088	-2.83473	975	0.618214
sp|Q4G069|RMD1_RAT	Regulator of microtubule dynamics protein 1 OS=Rattus norvegicus OX=10116 GN=Rmdn1 PE=2 SV=1	1.33575e-06	2.151e-06	9.45268e-05	1.44039e-06	2.13925e-06	1.17e-06	0.371715	-4.36709	976	0.625364
sp|Q5BJT7|CCD93_RAT	Coiled-coil domain-containing protein 93 OS=Rattus norvegicus OX=10116 GN=Ccdc93 PE=1 SV=1	1.33575e-06	2.151e-06	4.65871e-05	1.44039e-06	2.13925e-06	1.17e-06	0.369459	-3.39817	977	0.620933
sp|P11507|AT2A2_RAT,sp|P18596|AT2A3_RAT	Sarcoplasmic/endoplasmic reticulum calcium ATPase 2 OS=Rattus norvegicus OX=10116 GN=Atp2a2 PE=1 SV=1,Sarcoplasmic/endoplasmic reticulum calcium ATPase 3 OS=Rattus norvegicus OX=10116 GN=Atp2a3 PE=1 SV=3	1.33575e-06	2.151e-06	2.80952e-05	1.44039e-06	2.13925e-06	1.17e-06	0.36653	-2.73321	978	0.61538
sp|O08949|TF2AA_RAT	Transcription initiation factor IIA subunit 1 OS=Rattus norvegicus OX=10116 GN=Gtf2a1 PE=1 SV=1	1.33575e-06	2.151e-06	7.77276e-05	1.44039e-06	2.13925e-06	1.17e-06	0.371241	-4.09584	979	0.622654
sp|Q62813|LSAMP_RAT	Limbic system-associated membrane protein OS=Rattus norvegicus OX=10116 GN=Lsamp PE=1 SV=1	1.33575e-06	2.151e-06	8.66962e-05	1.44039e-06	2.13925e-06	1.17e-06	0.371517	-4.24696	980	0.62248
sp|Q9Z340|PARD3_RAT	Partitioning defective 3 homolog OS=Rattus norvegicus OX=10116 GN=Pard3 PE=1 SV=1	1.33575e-06	2.151e-06	4.38344e-05	1.44039e-06	2.13925e-06	1.17e-06	0.369179	-3.3166	981	0.617933
sp|Q9JI51|VTI1A_RAT	Vesicle transport through interaction with t-SNAREs homolog 1A OS=Rattus norvegicus OX=10116 GN=Vti1a PE=1 SV=1	1.33575e-06	2.151e-06	0.000130818	1.44039e-06	2.13925e-06	1.17e-06	0.372322	-4.82155	982	0.622559
sp|Q5M9F8|SCYL1_RAT	N-terminal kinase-like protein OS=Rattus norvegicus OX=10116 GN=Scyl1 PE=2 SV=1	1.33575e-06	2.151e-06	7.26228e-05	1.44039e-06	2.13925e-06	1.17e-06	0.371054	-4.00219	983	0.619807
sp|Q66H47|RM24_RAT	39S ribosomal protein L24, mitochondrial OS=Rattus norvegicus OX=10116 GN=Mrpl24 PE=2 SV=1	1.33575e-06	2.151e-06	0.000135663	1.44039e-06	2.13925e-06	1.17e-06	0.372378	-4.87268	984	0.621387
sp|Q68FU7|COQ6_RAT	Ubiquinone biosynthesis monooxygenase COQ6, mitochondrial OS=Rattus norvegicus OX=10116 GN=Coq6 PE=2 SV=1	1.33575e-06	2.151e-06	0.000123123	1.44039e-06	2.13925e-06	1.17e-06	0.372223	-4.73643	985	0.620498
sp|E9PU28|IMDH2_RAT	Inosine-5'-monophosphate dehydrogenase 2 OS=Rattus norvegicus OX=10116 GN=Impdh2 PE=1 SV=1	1.33575e-06	2.151e-06	5.70103e-05	1.44039e-06	2.13925e-06	1.17e-06	0.370272	-3.67098	986	0.61662
sp|Q6RUV5|RAC1_RAT	Ras-related C3 botulinum toxin substrate 1 OS=Rattus norvegicus OX=10116 GN=Rac1 PE=1 SV=1	1.33575e-06	2.151e-06	0.000152621	1.44039e-06	2.13925e-06	1.17e-06	0.372548	-5.03858	987	0.61978
sp|D4A6D7|TTC19_RAT	Tetratricopeptide repeat protein 19, mitochondrial OS=Rattus norvegicus OX=10116 GN=Ttc19 PE=3 SV=1	1.33575e-06	2.151e-06	8.0283e-05	1.44039e-06	2.13925e-06	1.17e-06	0.371326	-4.14054	988	0.617123
sp|Q9Z220|TSG10_RAT	Testis-specific gene 10 protein OS=Rattus norvegicus OX=10116 GN=Tsga10 PE=1 SV=2	1.33575e-06	2.151e-06	8.23127e-05	1.44039e-06	2.13925e-06	1.17e-06	0.37139	-4.17508	989	0.616604
sp|Q6GMN2|BAIP2_RAT	Brain-specific angiogenesis inhibitor 1-associated protein 2 OS=Rattus norvegicus OX=10116 GN=Baiap2 PE=1 SV=1	1.33575e-06	2.151e-06	5.47725e-05	1.44039e-06	2.13925e-06	1.17e-06	0.370124	-3.6166	990	0.613882
sp|Q9Z339|GSTO1_RAT	Glutathione S-transferase omega-1 OS=Rattus norvegicus OX=10116 GN=Gsto1 PE=1 SV=2	1.33575e-06	2.151e-06	0.00012159	1.44039e-06	2.13925e-06	1.17e-06	0.372202	-4.71886	991	0.616706
sp|Q68FV0|T178A_RAT	Transmembrane protein 178A OS=Rattus norvegicus OX=10116 GN=Tmem178a PE=2 SV=1	1.33575e-06	2.151e-06	9.86643e-05	1.44039e-06	2.13925e-06	1.17e-06	0.371806	-4.42674	992	0.61543
sp|P18484|AP2A2_RAT	AP-2 complex subunit alpha-2 OS=Rattus norvegicus OX=10116 GN=Ap2a2 PE=1 SV=3	1.33575e-06	2.151e-06	3.12402e-05	1.44039e-06	2.13925e-06	1.17e-06	0.367272	-2.87017	993	0.607312
sp|Q9Z1M9|SMC1A_RAT	Structural maintenance of chromosomes protein 1A OS=Rattus norvegicus OX=10116 GN=Smc1a PE=1 SV=1	1.33575e-06	2.151e-06	1.44708e-06	0.000105196	2.13925e-06	1.17e-06	0.373802	4.45892	994	0.617488
sp|Q9Z1B2|GSTM5_RAT	Glutathione S-transferase Mu 5 OS=Rattus norvegicus OX=10116 GN=Gstm5 PE=1 SV=3	1.33575e-06	2.151e-06	1.44708e-06	0.000115295	2.13925e-06	1.17e-06	0.373809	4.58731	995	0.616879
sp|Q62878|3BHS4_RAT	3 beta-hydroxysteroid dehydrogenase/Delta 5--)4-isomerase type 4 OS=Rattus norvegicus OX=10116 GN=Hsd3b6 PE=2 SV=4	1.33575e-06	2.151e-06	1.44708e-06	0.000278192	2.13925e-06	1.17e-06	0.373858	5.83429	996	0.61634
sp|P22071|3BHS1_RAT	3 beta-hydroxysteroid dehydrogenase/Delta 5--)4-isomerase type 1 OS=Rattus norvegicus OX=10116 GN=Hsd3b1 PE=1 SV=3	1.33575e-06	2.151e-06	1.44708e-06	0.000208644	2.13925e-06	1.17e-06	0.373845	5.4249	997	0.615701
sp|P63331|PP2AA_RAT	Serine/threonine-protein phosphatase 2A catalytic subunit alpha isoform OS=Rattus norvegicus OX=10116 GN=Ppp2ca PE=1 SV=1	1.33575e-06	2.151e-06	1.44708e-06	0.000335811	2.13925e-06	1.17e-06	0.373865	6.10295	998	0.615116
sp|P62716|PP2AB_RAT	Serine/threonine-protein phosphatase 2A catalytic subunit beta isoform OS=Rattus norvegicus OX=10116 GN=Ppp2cb PE=2 SV=1	1.33575e-06	2.151e-06	1.44708e-06	0.000251858	2.13925e-06	1.17e-06	0.373854	5.69259	999	0.614482
sp|Q4FZU2|K2C6A_RAT,sp|Q6IG00|K2C4_RAT	Keratin, type II cytoskeletal 6A OS=Rattus norvegicus OX=10116 GN=Krt6a PE=1 SV=1,Keratin, type II cytoskeletal 4 OS=Rattus norvegicus OX=10116 GN=Krt4 PE=3 SV=1	1.33575e-06	2.151e-06	1.44708e-06	0.000140986	2.13925e-06	1.17e-06	0.373823	4.87017	1000	0.613817
sp|Q6IG03|K2C73_RAT,sp|Q6IG04|K2C72_RAT,sp|Q6IMF3|K2C1_RAT	Keratin, type II cytoskeletal 73 OS=Rattus norvegicus OX=10116 GN=Krt73 PE=1 SV=1,Keratin, type II cytoskeletal 72 OS=Rattus norvegicus OX=10116 GN=Krt72 PE=3 SV=2,Keratin, type II cytoskeletal 1 OS=Rattus norvegicus OX=10116 GN=Krt1 PE=2 SV=1	1.33575e-06	2.151e-06	1.44708e-06	9.38207e-05	2.13925e-06	1.17e-06	0.373794	4.29914	1001	0.613156
sp|Q6IFU7|K1C42_RAT	Keratin, type I cytoskeletal 42 OS=Rattus norvegicus OX=10116 GN=Krt42 PE=3 SV=1	1.33575e-06	2.151e-06	1.44708e-06	0.000172178	2.13925e-06	1.17e-06	0.373835	5.15251	1002	0.612612
sp|Q6IFV1|K1C14_RAT,sp|Q6IFV4|K1C13_RAT,sp|Q6IFW2|K1C40_RAT,sp|Q6IFW6|K1C10_RAT,sp|Q6IFX1|K1C24_RAT	Keratin, type I cytoskeletal 14 OS=Rattus norvegicus OX=10116 GN=Krt14 PE=2 SV=1,Keratin, type I cytoskeletal 13 OS=Rattus norvegicus OX=10116 GN=Krt13 PE=3 SV=1,Keratin, type I cytoskeletal 40 OS=Rattus norvegicus OX=10116 GN=Krt40 PE=3 SV=1,Keratin, type I cytoskeletal 10 OS=Rattus norvegicus OX=10116 GN=Krt10 PE=3 SV=1,Keratin, type I cytoskeletal 24 OS=Rattus norvegicus OX=10116 GN=Krt24 PE=3…	1.33575e-06	2.151e-06	1.44708e-06	5.34875e-05	2.13925e-06	1.17e-06	0.373755	3.52503	1003	0.611871
sp|Q792I0|LIN7C_RAT	Protein lin-7 homolog C OS=Rattus norvegicus OX=10116 GN=Lin7c PE=1 SV=1	1.33575e-06	2.151e-06	1.44708e-06	0.000395047	2.13925e-06	1.17e-06	0.37387	6.33521	1004	0.611449
sp|Q9Z250|LIN7A_RAT	Protein lin-7 homolog A OS=Rattus norvegicus OX=10116 GN=Lin7a PE=1 SV=2	1.33575e-06	2.151e-06	1.44708e-06	0.000223633	2.13925e-06	1.17e-06	0.373848	5.52347	1005	0.610805
sp|Q9Z252|LIN7B_RAT	Protein lin-7 homolog B OS=Rattus norvegicus OX=10116 GN=Lin7b PE=1 SV=1	1.33575e-06	2.151e-06	1.44708e-06	0.000125321	2.13925e-06	1.17e-06	0.373815	4.70438	1006	0.610143
sp|Q5QE80|AOXC_RAT	Aldehyde oxidase 3 OS=Rattus norvegicus OX=10116 GN=Aox3 PE=1 SV=1	1.33575e-06	2.151e-06	1.44708e-06	7.77854e-05	2.13925e-06	1.17e-06	0.373779	4.03883	1007	0.609479
sp|Q9QYU2|EFTS_RAT	Elongation factor Ts, mitochondrial OS=Rattus norvegicus OX=10116 GN=Tsfm PE=2 SV=1	1.33575e-06	2.151e-06	1.44708e-06	0.000160132	2.13925e-06	1.17e-06	0.373831	5.04992	1008	0.608958
sp|Q9Z0W7|CLIC4_RAT	Chloride intracellular channel protein 4 OS=Rattus norvegicus OX=10116 GN=Clic4 PE=1 SV=3	1.33575e-06	2.151e-06	1.44708e-06	0.000615212	2.13925e-06	1.17e-06	0.373881	6.96997	1009	0.608436
sp|P43424|GALT_RAT	Galactose-1-phosphate uridylyltransferase OS=Rattus norvegicus OX=10116 GN=Galt PE=2 SV=1	1.33575e-06	2.151e-06	1.44708e-06	0.000205341	2.13925e-06	1.17e-06	0.373844	5.40224	1010	0.607775
sp|Q562C4|MET7B_RAT	Methyltransferase-like protein 7B OS=Rattus norvegicus OX=10116 GN=Mettl7b PE=1 SV=1	1.33575e-06	2.151e-06	1.44708e-06	0.000531587	2.13925e-06	1.17e-06	0.373878	6.76041	1011	0.607228
sp|G3V7P1|STX12_RAT	Syntaxin-12 OS=Rattus norvegicus OX=10116 GN=Stx12 PE=1 SV=1	1.33575e-06	2.151e-06	1.44708e-06	0.000189353	2.13925e-06	1.17e-06	0.37384	5.28723	1012	0.606567
sp|Q99PD4|ARC1A_RAT	Actin-related protein 2/3 complex subunit 1A OS=Rattus norvegicus OX=10116 GN=Arpc1a PE=2 SV=1	1.33575e-06	2.151e-06	1.44708e-06	0.000140224	2.13925e-06	1.17e-06	0.373822	4.86253	1013	0.605939
sp|Q4L1J4|MAGI1_RAT	Membrane-associated guanylate kinase, WW and PDZ domain-containing protein 1 OS=Rattus norvegicus OX=10116 GN=Magi1 PE=1 SV=1	1.33575e-06	2.151e-06	1.44708e-06	6.20114e-05	2.13925e-06	1.17e-06	0.373763	3.72676	1014	0.605246
sp|P62749|HPCL1_RAT,sp|P84076|HPCA_RAT	Hippocalcin-like protein 1 OS=Rattus norvegicus OX=10116 GN=Hpcal1 PE=1 SV=2,Neuron-specific calcium-binding protein hippocalcin OS=Rattus norvegicus OX=10116 GN=Hpca PE=1 SV=2	1.33575e-06	2.151e-06	1.44708e-06	0.000134412	2.13925e-06	1.17e-06	0.37382	4.80289	1015	0.604741
sp|P04800|CP3A1_RAT	Cytochrome P450 3A1 OS=Rattus norvegicus OX=10116 GN=Cyp3a1 PE=1 SV=1	1.33575e-06	2.151e-06	1.44708e-06	5.14711e-05	2.13925e-06	1.17e-06	0.373754	3.47288	1016	0.604039
sp|P27274|CD59_RAT	CD59 glycoprotein OS=Rattus norvegicus OX=10116 GN=Cd59 PE=1 SV=2	1.33575e-06	2.151e-06	1.44708e-06	0.000617653	2.13925e-06	1.17e-06	0.373881	6.97565	1017	0.60365
sp|P54313|GBB2_RAT	Guanine nucleotide-binding protein G(I)/G(S)/G(T) subunit beta-2 OS=Rattus norvegicus OX=10116 GN=Gnb2 PE=1 SV=4	1.33575e-06	2.151e-06	1.44708e-06	0.000152597	2.13925e-06	1.17e-06	0.373828	4.98182	1018	0.602972
sp|D3ZBN0|H15_RAT	Histone H1.5 OS=Rattus norvegicus OX=10116 GN=H1-5 PE=1 SV=1	1.33575e-06	2.151e-06	1.44708e-06	0.000467413	2.13925e-06	1.17e-06	0.373875	6.57602	1019	0.602455
sp|P21913|SDHB_RAT	Succinate dehydrogenase [ubiquinone] iron-sulfur subunit, mitochondrial OS=Rattus norvegicus OX=10116 GN=Sdhb PE=2 SV=2	1.33575e-06	2.151e-06	1.44708e-06	0.000183982	2.13925e-06	1.17e-06	0.373839	5.24643	1020	0.601807
sp|Q80U96|XPO1_RAT	Exportin-1 OS=Rattus norvegicus OX=10116 GN=Xpo1 PE=1 SV=1	1.33575e-06	2.151e-06	1.44708e-06	2.42217e-05	2.13925e-06	1.17e-06	0.373873	2.48027	1021	0.601273
sp|Q63060|GLPK_RAT	Glycerol kinase OS=Rattus norvegicus OX=10116 GN=Gk PE=2 SV=1	1.33575e-06	2.151e-06	1.44708e-06	4.95065e-05	2.13925e-06	1.17e-06	0.373752	3.42019	1022	0.600491
sp|Q99MH3|HEPC_RAT	Hepcidin OS=Rattus norvegicus OX=10116 GN=Hamp PE=3 SV=1	1.33575e-06	2.151e-06	1.44708e-06	0.000308826	2.13925e-06	1.17e-06	0.373862	5.98332	1023	0.600079
sp|Q6AY59|MOC2B_RAT	Molybdopterin synthase catalytic subunit OS=Rattus norvegicus OX=10116 GN=Mocs2 PE=2 SV=1	1.33575e-06	2.151e-06	1.44708e-06	0.000259414	2.13925e-06	1.17e-06	0.373855	5.73469	1024	0.599482
sp|Q08850|STX4_RAT	Syntaxin-4 OS=Rattus norvegicus OX=10116 GN=Stx4 PE=1 SV=1	1.33575e-06	2.151e-06	1.44708e-06	8.70518e-05	2.13925e-06	1.17e-06	0.373788	4.19492	1025	0.59879
sp|Q4V8C3|EMAL1_RAT	Echinoderm microtubule-associated protein-like 1 OS=Rattus norvegicus OX=10116 GN=Eml1 PE=1 SV=2	1.33575e-06	2.151e-06	1.44708e-06	3.18691e-05	2.13925e-06	1.17e-06	0.373778	2.83391	1026	0.59819
sp|P25809|KCRU_RAT	Creatine kinase U-type, mitochondrial OS=Rattus norvegicus OX=10116 GN=Ckmt1 PE=1 SV=1	1.33575e-06	2.151e-06	1.44708e-06	6.20608e-05	2.13925e-06	1.17e-06	0.373763	3.72785	1027	0.597585
sp|Q5U2X0|CARF_RAT	CDKN2A-interacting protein OS=Rattus norvegicus OX=10116 GN=Cdkn2aip PE=1 SV=1	1.33575e-06	2.151e-06	1.44708e-06	4.55113e-05	2.13925e-06	1.17e-06	0.373751	3.30671	1028	0.596984
sp|P15800|LAMB2_RAT	Laminin subunit beta-2 OS=Rattus norvegicus OX=10116 GN=Lamb2 PE=1 SV=1	1.33575e-06	2.151e-06	1.44708e-06	1.44039e-05	2.13925e-06	1.17e-06	0.374588	1.84404	1029	0.59774
sp|P28494|MA2A1_RAT	Alpha-mannosidase 2 OS=Rattus norvegicus OX=10116 GN=Man2a1 PE=1 SV=2	1.33575e-06	2.151e-06	1.44708e-06	2.25971e-05	2.13925e-06	1.17e-06	0.373916	2.39252	1030	0.596088
sp|B7SBD2|TOX3_RAT,sp|Q99PM1|TOX4_RAT	TOX high mobility group box family member 3 OS=Rattus norvegicus OX=10116 GN=Tox3 PE=1 SV=1,TOX high mobility group box family member 4 OS=Rattus norvegicus OX=10116 GN=Tox4 PE=1 SV=1	1.33575e-06	2.151e-06	1.44708e-06	4.49591e-05	2.13925e-06	1.17e-06	0.373751	3.2903	1031	0.595246
sp|Q9QX69|LANC1_RAT	Glutathione S-transferase LANCL1 OS=Rattus norvegicus OX=10116 GN=Lancl1 PE=1 SV=2	1.33575e-06	2.151e-06	1.44708e-06	6.50161e-05	2.13925e-06	1.17e-06	0.373766	3.79164	1032	0.594694
sp|O70513|LG3BP_RAT	Galectin-3-binding protein OS=Rattus norvegicus OX=10116 GN=Lgals3bp PE=1 SV=2	1.33575e-06	2.151e-06	1.44708e-06	1.44039e-06	0.000152394	1.17e-06	0.37681	4.97345	1033	0.598957
sp|Q5U3Z3|ISOC2_RAT	Isochorismatase domain-containing protein 2 OS=Rattus norvegicus OX=10116 GN=Isoc2 PE=2 SV=1	1.33575e-06	2.151e-06	1.44708e-06	1.44039e-06	0.000416543	1.17e-06	0.374956	6.40863	1034	0.595433
sp|P08542|UDB17_RAT,sp|P19488|UDB37_RAT	UDP-glucuronosyltransferase 2B17 OS=Rattus norvegicus OX=10116 GN=Ugt2b17 PE=1 SV=2,UDP-glucuronosyltransferase 2B37 OS=Rattus norvegicus OX=10116 GN=Ugt2b37 PE=2 SV=1	1.33575e-06	2.151e-06	1.44708e-06	1.44039e-06	0.00033009	1.17e-06	0.375234	6.07537	1035	0.595299
sp|P05178|CP2C6_RAT	Cytochrome P450 2C6 OS=Rattus norvegicus OX=10116 GN=Cyp2c6 PE=2 SV=2	1.33575e-06	2.151e-06	1.44708e-06	1.44039e-06	0.000119012	1.17e-06	0.377641	4.62356	1036	0.598539
sp|P27364|3BHS5_RAT	NADPH-dependent 3-keto-steroid reductase Hsd3b5 OS=Rattus norvegicus OX=10116 GN=Hsd3b5 PE=1 SV=3	1.33575e-06	2.151e-06	1.44708e-06	1.44039e-06	0.000938058	1.17e-06	0.374368	7.57484	1037	0.592779
sp|P22072|3BHS2_RAT	3 beta-hydroxysteroid dehydrogenase/Delta 5--)4-isomerase type 2 OS=Rattus norvegicus OX=10116 GN=Hsd3b PE=2 SV=3	1.33575e-06	2.151e-06	1.44708e-06	1.44039e-06	0.000703544	1.17e-06	0.374524	7.16113	1038	0.592455
sp|P35213|1433B_RAT,sp|P68255|1433T_RAT,sp|P68511|1433F_RAT	14-3-3 protein beta/alpha OS=Rattus norvegicus OX=10116 GN=Ywhab PE=1 SV=3,14-3-3 protein theta OS=Rattus norvegicus OX=10116 GN=Ywhaq PE=1 SV=1,14-3-3 protein eta OS=Rattus norvegicus OX=10116 GN=Ywhah PE=1 SV=2	1.33575e-06	2.151e-06	1.44708e-06	1.44039e-06	0.000237057	1.17e-06	0.375762	5.60218	1039	0.593841
sp|P62749|HPCL1_RAT	Hippocalcin-like protein 1 OS=Rattus norvegicus OX=10116 GN=Hpcal1 PE=1 SV=2	1.33575e-06	2.151e-06	1.44708e-06	1.44039e-06	0.000302155	1.17e-06	0.375358	5.94885	1040	0.592633
sp|Q9JHY2|SFXN3_RAT	Sideroflexin-3 OS=Rattus norvegicus OX=10116 GN=Sfxn3 PE=2 SV=1	1.33575e-06	2.151e-06	1.44708e-06	1.44039e-06	9.08348e-05	1.17e-06	0.378829	4.24334	1041	0.597538
sp|P19132|FRIH_RAT	Ferritin heavy chain OS=Rattus norvegicus OX=10116 GN=Fth1 PE=1 SV=3	1.33575e-06	2.151e-06	1.44708e-06	1.44039e-06	0.000961252	1.17e-06	0.374357	7.60998	1042	0.589917
sp|Q8CJB9|BRE1B_RAT	E3 ubiquitin-protein ligase BRE1B OS=Rattus norvegicus OX=10116 GN=Rnf40 PE=1 SV=1	1.33575e-06	2.151e-06	1.44708e-06	1.44039e-06	5.81996e-05	1.17e-06	0.381696	3.62353	1043	0.600906
sp|P70567|TMOD1_RAT	Tropomodulin-1 OS=Rattus norvegicus OX=10116 GN=Tmod1 PE=2 SV=1	1.33575e-06	2.151e-06	1.44708e-06	1.44039e-06	0.00016244	1.17e-06	0.376628	5.06406	1044	0.592359
sp|Q5FVK6|C2D1B_RAT	Coiled-coil and C2 domain-containing protein 1B OS=Rattus norvegicus OX=10116 GN=Cc2d1b PE=1 SV=2	1.33575e-06	2.151e-06	1.44708e-06	1.44039e-06	0.000102911	1.17e-06	0.378238	4.41868	1045	0.594323
sp|Q5HZE4|MTNA_RAT	Methylthioribose-1-phosphate isomerase OS=Rattus norvegicus OX=10116 GN=Mri1 PE=1 SV=1	1.33575e-06	2.151e-06	1.44708e-06	1.44039e-06	0.000158038	1.17e-06	0.376705	5.02505	1046	0.591347
sp|Q5RLM2|S22A7_RAT	Solute carrier family 22 member 7 OS=Rattus norvegicus OX=10116 GN=Slc22a7 PE=1 SV=1	1.33575e-06	2.151e-06	1.44708e-06	1.44039e-06	0.000109002	1.17e-06	0.377991	4.49964	1047	0.5928
sp|Q63448|ACOX3_RAT	Peroxisomal acyl-coenzyme A oxidase 3 OS=Rattus norvegicus OX=10116 GN=Acox3 PE=1 SV=1	1.33575e-06	2.151e-06	1.44708e-06	1.44039e-06	4.16543e-05	1.17e-06	0.384957	3.16538	1048	0.603148
sp|P53565|CUX1_RAT	Homeobox protein cut-like 1 OS=Rattus norvegicus OX=10116 GN=Cux1 PE=1 SV=2	1.33575e-06	2.151e-06	1.44708e-06	1.44039e-06	5.81609e-05	1.17e-06	0.381701	3.62261	1049	0.597477
sp|O70490|ACSM2_RAT	Acyl-coenzyme A synthetase ACSM2, mitochondrial OS=Rattus norvegicus OX=10116 GN=Acsm2 PE=2 SV=2	1.33575e-06	2.151e-06	1.44708e-06	1.44039e-06	0.000203902	1.17e-06	0.376068	5.38738	1050	0.588098
sp|P23562|B3AT_RAT	Band 3 anion transport protein OS=Rattus norvegicus OX=10116 GN=Slc4a1 PE=1 SV=3	1.33575e-06	2.151e-06	1.44708e-06	1.44039e-06	9.43624e-05	1.17e-06	0.37864	4.2968	1051	0.591558
sp|O35264|PA1B2_RAT	Platelet-activating factor acetylhydrolase IB subunit alpha2 OS=Rattus norvegicus OX=10116 GN=Pafah1b2 PE=1 SV=1	1.33575e-06	2.151e-06	1.44708e-06	1.44039e-06	0.000254655	1.17e-06	0.375632	5.70441	1052	0.5863
sp|P55213|CASP3_RAT	Caspase-3 OS=Rattus norvegicus OX=10116 GN=Casp3 PE=2 SV=2	1.33575e-06	2.151e-06	1.44708e-06	1.44039e-06	0.000105263	1.17e-06	0.378139	4.45049	1053	0.589653
sp|P16391|HA12_RAT	RT1 class I histocompatibility antigen, AA alpha chain OS=Rattus norvegicus OX=10116 PE=1 SV=2	1.33575e-06	2.151e-06	1.44708e-06	1.44039e-06	0.000157186	1.17e-06	0.37672	5.01738	1054	0.586883
sp|P19356|HEM3_RAT	Porphobilinogen deaminase OS=Rattus norvegicus OX=10116 GN=Hmbs PE=1 SV=2	1.33575e-06	2.151e-06	1.44708e-06	1.44039e-06	8.077e-05	1.17e-06	0.379459	4.07893	1055	0.59059
sp|Q3B8Q0|MARE2_RAT	Microtubule-associated protein RP/EB family member 2 OS=Rattus norvegicus OX=10116 GN=Mapre2 PE=1 SV=1	1.33575e-06	2.151e-06	1.44708e-06	1.44039e-06	8.94417e-05	1.17e-06	0.378907	4.22167	1056	0.589172
sp|Q5FVN1|STBD1_RAT	Starch-binding domain-containing protein 1 OS=Rattus norvegicus OX=10116 GN=Stbd1 PE=1 SV=1	1.33575e-06	2.151e-06	1.44708e-06	1.44039e-06	8.75615e-05	1.17e-06	0.379018	4.1919	1057	0.588786
sp|Q63207|FA10_RAT	Coagulation factor X OS=Rattus norvegicus OX=10116 GN=F10 PE=2 SV=1	1.33575e-06	2.151e-06	1.44708e-06	1.44039e-06	6.04937e-05	1.17e-06	0.38139	3.67696	1058	0.591911
sp|Q498C8|RER1_RAT	Protein RER1 OS=Rattus norvegicus OX=10116 GN=Rer1 PE=1 SV=1	1.33575e-06	2.151e-06	1.44708e-06	1.44039e-06	0.000148765	1.17e-06	0.376882	4.93928	1059	0.584363
sp|P04166|CYB5B_RAT	Cytochrome b5 type B OS=Rattus norvegicus OX=10116 GN=Cyb5b PE=1 SV=2	1.33575e-06	2.151e-06	1.44708e-06	1.44039e-06	0.000399424	1.17e-06	0.375001	6.34847	1060	0.580898
sp|P70569|MYO5B_RAT	Unconventional myosin-Vb OS=Rattus norvegicus OX=10116 GN=Myo5b PE=1 SV=1	1.33575e-06	2.151e-06	1.44708e-06	1.44039e-06	7.89761e-05	1.17e-06	0.379589	4.04755	1061	0.587451
sp|Q8K4C0|FMO5_RAT	Flavin-containing monooxygenase 5 OS=Rattus norvegicus OX=10116 GN=Fmo5 PE=1 SV=3	1.33575e-06	2.151e-06	1.44708e-06	1.44039e-06	5.47054e-05	1.17e-06	0.382214	3.53815	1062	0.590956
sp|P19332|TAU_RAT	Microtubule-associated protein tau OS=Rattus norvegicus OX=10116 GN=Mapt PE=1 SV=3	1.33575e-06	2.151e-06	1.44708e-06	1.44039e-06	3.87739e-05	1.17e-06	0.385825	3.0683	1063	0.595978
sp|Q91V33|KHDR1_RAT	KH domain-containing, RNA-binding, signal transduction-associated protein 1 OS=Rattus norvegicus OX=10116 GN=Khdrbs1 PE=1 SV=1	1.33575e-06	2.151e-06	1.44708e-06	1.44039e-06	6.58194e-05	1.17e-06	0.380764	3.79384	1064	0.587607
sp|P35738|ODBB_RAT	2-oxoisovalerate dehydrogenase subunit beta, mitochondrial OS=Rattus norvegicus OX=10116 GN=Bckdhb PE=1 SV=3	1.33575e-06	2.151e-06	1.44708e-06	1.44039e-06	0.000149528	1.17e-06	0.376867	4.94653	1065	0.581047
sp|Q5BK63|NDUA9_RAT	NADH dehydrogenase [ubiquinone] 1 alpha subcomplex subunit 9, mitochondrial OS=Rattus norvegicus OX=10116 GN=Ndufa9 PE=1 SV=2	1.33575e-06	2.151e-06	1.44708e-06	1.44039e-06	7.73421e-05	1.17e-06	0.379713	4.01836	1066	0.584886
sp|Q5M862|CC134_RAT	Coiled-coil domain-containing protein 134 OS=Rattus norvegicus OX=10116 GN=Ccdc134 PE=2 SV=1	1.33575e-06	2.151e-06	1.44708e-06	1.44039e-06	0.000127327	1.17e-06	0.377393	4.71897	1067	0.580767
sp|P35467|S10A1_RAT	Protein S100-A1 OS=Rattus norvegicus OX=10116 GN=S100a1 PE=1 SV=3	1.33575e-06	2.151e-06	1.44708e-06	1.44039e-06	0.000310191	1.17e-06	0.37532	5.9864	1068	0.577037
sp|P49889|ST1E3_RAT,sp|P49890|STE2_RAT,sp|P52844|ST1E1_RAT,sp|P52845|ST1E2_RAT	Estrogen sulfotransferase, isoform 3 OS=Rattus norvegicus OX=10116 GN=Ste PE=1 SV=1,Estrogen sulfotransferase Ste2 OS=Rattus norvegicus OX=10116 GN=Ste2 PE=1 SV=1,Sulfotransferase 1E1 OS=Rattus norvegicus OX=10116 GN=Sult1e1 PE=1 SV=1,Estrogen sulfotransferase, isoform 2 OS=Rattus norvegicus OX=10116 GN=Ste2 PE=1 SV=1	1.33575e-06	2.151e-06	1.44708e-06	1.44039e-06	0.000296522	1.17e-06	0.375386	5.92193	1069	0.576598
sp|Q62720|ZNT1_RAT	Zinc transporter 1 OS=Rattus norvegicus OX=10116 GN=Slc30a1 PE=2 SV=1	1.33575e-06	2.151e-06	1.44708e-06	1.44039e-06	0.000115022	1.17e-06	0.377773	4.57543	1070	0.579723
sp|P05178|CP2C6_RAT,sp|P11510|CP2CC_RAT	Cytochrome P450 2C6 OS=Rattus norvegicus OX=10116 GN=Cyp2c6 PE=2 SV=2,Cytochrome P450 2C12, female-specific OS=Rattus norvegicus OX=10116 GN=Cyp2c12 PE=2 SV=1	1.33575e-06	2.151e-06	1.44708e-06	1.44039e-06	2.13925e-06	5.79713e-05	0.37065	3.641	1071	0.56826
sp|P62986|RL40_RAT	Ubiquitin-60S ribosomal protein L40 OS=Rattus norvegicus OX=10116 GN=Uba52 PE=1 SV=2	1.33575e-06	2.151e-06	1.44708e-06	1.44039e-06	2.13925e-06	0.00177537	0.373796	8.4941	1072	0.572549
sp|P0CG51|UBB_RAT,sp|Q63429|UBC_RAT	Polyubiquitin-B OS=Rattus norvegicus OX=10116 GN=Ubb PE=1 SV=1,Polyubiquitin-C OS=Rattus norvegicus OX=10116 GN=Ubc PE=1 SV=1	1.33575e-06	2.151e-06	1.44708e-06	1.44039e-06	2.13925e-06	0.000651939	0.373614	7.05379	1073	0.571737
sp|Q6IG03|K2C73_RAT	Keratin, type II cytoskeletal 73 OS=Rattus norvegicus OX=10116 GN=Krt73 PE=1 SV=1	1.33575e-06	2.151e-06	1.44708e-06	1.44039e-06	2.13925e-06	0.000359569	0.37338	6.20171	1074	0.570847
sp|Q6IMF3|K2C1_RAT	Keratin, type II cytoskeletal 1 OS=Rattus norvegicus OX=10116 GN=Krt1 PE=2 SV=1	1.33575e-06	2.151e-06	1.44708e-06	1.44039e-06	2.13925e-06	0.000318146	0.373312	6.02698	1075	0.570213
sp|Q4FZU2|K2C6A_RAT	Keratin, type II cytoskeletal 6A OS=Rattus norvegicus OX=10116 GN=Krt6a PE=1 SV=1	1.33575e-06	2.151e-06	1.44708e-06	1.44039e-06	2.13925e-06	0.00015438	0.372686	5.00071	1076	0.568727
sp|Q6IG00|K2C4_RAT,sp|Q6IG04|K2C72_RAT	Keratin, type II cytoskeletal 4 OS=Rattus norvegicus OX=10116 GN=Krt4 PE=3 SV=1,Keratin, type II cytoskeletal 72 OS=Rattus norvegicus OX=10116 GN=Krt72 PE=3 SV=2	1.33575e-06	2.151e-06	1.44708e-06	1.44039e-06	2.13925e-06	5.29961e-05	0.370342	3.51941	1077	0.564625
sp|Q6IFW6|K1C10_RAT	Keratin, type I cytoskeletal 10 OS=Rattus norvegicus OX=10116 GN=Krt10 PE=3 SV=1	1.33575e-06	2.151e-06	1.44708e-06	1.44039e-06	2.13925e-06	0.000270018	0.373207	5.79321	1078	0.568466
sp|Q6IFU7|K1C42_RAT,sp|Q6IFV1|K1C14_RAT,sp|Q6IFV4|K1C13_RAT,sp|Q6IFW2|K1C40_RAT,sp|Q6IFX1|K1C24_RAT	Keratin, type I cytoskeletal 42 OS=Rattus norvegicus OX=10116 GN=Krt42 PE=3 SV=1,Keratin, type I cytoskeletal 14 OS=Rattus norvegicus OX=10116 GN=Krt14 PE=2 SV=1,Keratin, type I cytoskeletal 13 OS=Rattus norvegicus OX=10116 GN=Krt13 PE=3 SV=1,Keratin, type I cytoskeletal 40 OS=Rattus norvegicus OX=10116 GN=Krt40 PE=3 SV=1,Keratin, type I cytoskeletal 24 OS=Rattus norvegicus OX=10116 GN=Krt24 PE=3…	1.33575e-06	2.151e-06	1.44708e-06	1.44039e-06	2.13925e-06	6.2845e-05	0.370903	3.75094	1079	0.564433
sp|Q91ZN1|COR1A_RAT	Coronin-1A OS=Rattus norvegicus OX=10116 GN=Coro1a PE=1 SV=3	1.33575e-06	2.151e-06	1.44708e-06	1.44039e-06	2.13925e-06	0.000123236	0.372378	4.68388	1080	0.566152
sp|P02693|FABPI_RAT	Fatty acid-binding protein, intestinal OS=Rattus norvegicus OX=10116 GN=Fabp2 PE=1 SV=4	1.33575e-06	2.151e-06	1.44708e-06	1.44039e-06	2.13925e-06	0.000430393	0.373466	6.45875	1081	0.567281
sp|P06765|PLF4_RAT	Platelet factor 4 OS=Rattus norvegicus OX=10116 GN=Pf4 PE=1 SV=1	1.33575e-06	2.151e-06	1.44708e-06	1.44039e-06	2.13925e-06	0.000811598	0.37367	7.36826	1082	0.567067
sp|Q66H15|RMD3_RAT	Regulator of microtubule dynamics protein 3 OS=Rattus norvegicus OX=10116 GN=Rmdn3 PE=1 SV=1	1.33575e-06	2.151e-06	1.44708e-06	1.44039e-06	2.13925e-06	0.00012062	0.372344	4.65381	1083	0.564533
sp|P36860|RALB_RAT,sp|P63322|RALA_RAT	Ras-related protein Ral-B OS=Rattus norvegicus OX=10116 GN=Ralb PE=2 SV=1,Ras-related protein Ral-A OS=Rattus norvegicus OX=10116 GN=Rala PE=1 SV=1	1.33575e-06	2.151e-06	1.44708e-06	1.44039e-06	2.13925e-06	0.000275786	0.373222	5.8233	1084	0.565341
sp|Q7TS56|CBR4_RAT	Carbonyl reductase family member 4 OS=Rattus norvegicus OX=10116 GN=Cbr4 PE=2 SV=1	1.33575e-06	2.151e-06	1.44708e-06	1.44039e-06	2.13925e-06	0.000361092	0.373382	6.20775	1085	0.565063
sp|P21744|IBP4_RAT	Insulin-like growth factor-binding protein 4 OS=Rattus norvegicus OX=10116 GN=Igfbp4 PE=1 SV=2	1.33575e-06	2.151e-06	1.44708e-06	1.44039e-06	2.13925e-06	0.000223669	0.373063	5.52542	1086	0.56406
sp|Q9JLH7|CK5P3_RAT	CDK5 regulatory subunit-associated protein 3 OS=Rattus norvegicus OX=10116 GN=Cdk5rap3 PE=1 SV=1	1.33575e-06	2.151e-06	1.44708e-06	1.44039e-06	2.13925e-06	0.000112722	0.372235	4.55902	1087	0.56229
sp|Q8R2H5|PHLD_RAT	Phosphatidylinositol-glycan-specific phospholipase D OS=Rattus norvegicus OX=10116 GN=Gpld1 PE=2 SV=1	1.33575e-06	2.151e-06	1.44708e-06	1.44039e-06	2.13925e-06	3.36962e-05	0.36828	2.91746	1088	0.555805
sp|P36876|2ABA_RAT	Serine/threonine-protein phosphatase 2A 55 kDa regulatory subunit B alpha isoform OS=Rattus norvegicus OX=10116 GN=Ppp2r2a PE=2 SV=1	1.33575e-06	2.151e-06	1.44708e-06	1.44039e-06	2.13925e-06	6.3548e-05	0.370937	3.76613	1089	0.559301
sp|P53563|B2CL1_RAT	Bcl-2-like protein 1 OS=Rattus norvegicus OX=10116 GN=Bcl2l1 PE=1 SV=2	1.33575e-06	2.151e-06	1.44708e-06	1.44039e-06	2.13925e-06	0.000243828	0.373132	5.64804	1090	0.562095
sp|Q5PQM2|KLC4_RAT	Kinesin light chain 4 OS=Rattus norvegicus OX=10116 GN=Klc4 PE=1 SV=1	1.33575e-06	2.151e-06	1.44708e-06	1.44039e-06	2.13925e-06	0.00018356	0.372879	5.24527	1091	0.561199
sp|O88994|MARC2_RAT	Mitochondrial amidoxime reducing component 2 OS=Rattus norvegicus OX=10116 GN=Mtarc2 PE=2 SV=1	1.33575e-06	2.151e-06	1.44708e-06	1.44039e-06	2.13925e-06	0.000252124	0.373158	5.69562	1092	0.561104
sp|Q4V8H8|EHD2_RAT	EH domain-containing protein 2 OS=Rattus norvegicus OX=10116 GN=Ehd2 PE=1 SV=1	1.33575e-06	2.151e-06	1.44708e-06	1.44039e-06	2.13925e-06	5.2313e-05	0.370295	3.50188	1093	0.55629
sp|Q4V7C7|ARP3_RAT	Actin-related protein 3 OS=Rattus norvegicus OX=10116 GN=Actr3 PE=1 SV=1	1.33575e-06	2.151e-06	1.44708e-06	1.44039e-06	2.13925e-06	0.000135914	0.37252	4.82134	1094	0.559121
sp|P09367|SDHL_RAT	L-serine dehydratase/L-threonine deaminase OS=Rattus norvegicus OX=10116 GN=Sds PE=1 SV=3	1.33575e-06	2.151e-06	1.44708e-06	1.44039e-06	2.13925e-06	0.000156507	0.372702	5.02	1095	0.558883
sp|P06685|AT1A1_RAT,sp|P06686|AT1A2_RAT,sp|P06687|AT1A3_RAT	Sodium/potassium-transporting ATPase subunit alpha-1 OS=Rattus norvegicus OX=10116 GN=Atp1a1 PE=1 SV=1,Sodium/potassium-transporting ATPase subunit alpha-2 OS=Rattus norvegicus OX=10116 GN=Atp1a2 PE=1 SV=1,Sodium/potassium-transporting ATPase subunit alpha-3 OS=Rattus norvegicus OX=10116 GN=Atp1a3 PE=1 SV=2	1.33575e-06	2.151e-06	1.44708e-06	1.44039e-06	2.13925e-06	2.77673e-05	0.367064	2.66754	1096	0.549927
sp|P59924|THOC1_RAT	THO complex subunit 1 OS=Rattus norvegicus OX=10116 GN=Thoc1 PE=2 SV=1	1.33575e-06	2.151e-06	1.44708e-06	1.44039e-06	2.13925e-06	8.28161e-05	0.37163	4.13018	1097	0.556259
sp|P83941|ELOC_RAT	Elongin-C OS=Rattus norvegicus OX=10116 GN=Eloc PE=1 SV=1	1.33575e-06	2.151e-06	1.44708e-06	1.44039e-06	2.13925e-06	0.000760873	0.373655	7.27558	1098	0.558781
sp|Q7TSU1|BIG2_RAT	Brefeldin A-inhibited guanine nucleotide-exchange protein 2 OS=Rattus norvegicus OX=10116 GN=Arfgef2 PE=1 SV=1	1.33575e-06	2.151e-06	1.44708e-06	1.44039e-06	2.13925e-06	1.58604e-05	0.361843	1.97825	1099	0.540625
sp|Q9WVH8|FBLN5_RAT	Fibulin-5 OS=Rattus norvegicus OX=10116 GN=Fbln5 PE=2 SV=1	1.33575e-06	2.151e-06	1.44708e-06	1.44039e-06	2.13925e-06	6.34061e-05	0.37093	3.76307	1100	0.553698
sp|D4ACP2|SIM12_RAT	Small integral membrane protein 12 OS=Rattus norvegicus OX=10116 GN=Smim12 PE=3 SV=1	1.33575e-06	2.151e-06	1.44708e-06	1.44039e-06	2.13925e-06	0.00030876	0.373294	5.98427	1101	0.55672
sp|Q8VHU4|ELP1_RAT	Elongator complex protein 1 OS=Rattus norvegicus OX=10116 GN=Elp1 PE=2 SV=1	1.33575e-06	2.151e-06	1.44708e-06	1.44039e-06	2.13925e-06	8.53672e-05	0.371698	4.17216	1102	0.553837
sp|Q62796|RBP1_RAT	RalA-binding protein 1 OS=Rattus norvegicus OX=10116 GN=Ralbp1 PE=1 SV=3	1.33575e-06	2.151e-06	1.44708e-06	1.44039e-06	2.13925e-06	4.39041e-05	0.369598	3.26665	1103	0.550209
sp|Q9ESR9|ABCA2_RAT	ATP-binding cassette sub-family A member 2 OS=Rattus norvegicus OX=10116 GN=Abca2 PE=1 SV=1	1.33575e-06	2.151e-06	1.44708e-06	1.44039e-06	2.13925e-06	1.16705e-05	0.357469	1.62804	1104	0.53167
sp|P49816|TSC2_RAT	Tuberin OS=Rattus norvegicus OX=10116 GN=Tsc2 PE=1 SV=1	1.33575e-06	2.151e-06	1.44708e-06	1.44039e-06	2.13925e-06	3.14051e-05	0.367865	2.82595	1105	0.546637
sp|Q66HA5|C2D1A_RAT	Coiled-coil and C2 domain-containing protein 1A OS=Rattus norvegicus OX=10116 GN=Cc2d1a PE=1 SV=2	1.33575e-06	2.151e-06	1.44708e-06	1.44039e-06	2.13925e-06	3.0187e-05	0.367619	2.77482	1106	0.545777
sp|Q5RJN4|SHFL_RAT	Shiftless antiviral inhibitor of ribosomal frameshifting protein homolog OS=Rattus norvegicus OX=10116 GN=Shfl PE=2 SV=1	1.33575e-06	2.151e-06	1.44708e-06	1.44039e-06	2.13925e-06	0.00017427	0.372825	5.1718	1107	0.553007
sp|Q62868|ROCK2_RAT	Rho-associated protein kinase 2 OS=Rattus norvegicus OX=10116 GN=Rock2 PE=1 SV=2	1.33575e-06	2.151e-06	1.44708e-06	1.44039e-06	2.13925e-06	2.04654e-05	0.364588	2.28496	1108	0.540301
sp|P63031|MPC1_RAT	Mitochondrial pyruvate carrier 1 OS=Rattus norvegicus OX=10116 GN=Mpc1 PE=3 SV=1	1.33575e-06	2.151e-06	1.44708e-06	1.44039e-06	2.13925e-06	0.000260605	0.373182	5.74269	1109	0.552538
sp|P63004|LIS1_RAT	Platelet-activating factor acetylhydrolase IB subunit alpha OS=Rattus norvegicus OX=10116 GN=Pafah1b1 PE=1 SV=2	1.33575e-06	2.151e-06	1.44708e-06	1.44039e-06	2.13925e-06	0.000207848	0.372999	5.42131	1110	0.55177
sp|Q64581|CP3AI_RAT	Cytochrome P450 3A18 OS=Rattus norvegicus OX=10116 GN=Cyp3a18 PE=2 SV=1	1.33575e-06	2.151e-06	1.44708e-06	1.44039e-06	2.13925e-06	0.00011431	0.372258	4.57858	1111	0.550178
sp|P62912|RL32_RAT	60S ribosomal protein L32 OS=Rattus norvegicus OX=10116 GN=Rpl32 PE=1 SV=2	0.000400725	0.000402795	0.000217062	0.000192159	2.13925e-06	0.000420829	0.375944	-0.730436	1112	0.555126
sp|Q09167|SRSF5_RAT	Serine/arginine-rich splicing factor 5 OS=Rattus norvegicus OX=10116 GN=Srsf5 PE=1 SV=1	0.000402215	0.000202146	0.000217868	0.00028931	2.13925e-06	0.000211197	0.376267	-0.71	1113	0.555103
sp|Q66HG8|RED_RAT	Protein Red OS=Rattus norvegicus OX=10116 GN=Ik PE=1 SV=1	0.000291371	0.000341688	0.000157827	0.000232867	0.000261741	1.17e-06	0.376847	-0.673776	1114	0.555461
sp|Q68FT3|PYRD2_RAT	Pyridine nucleotide-disulfide oxidoreductase domain-containing protein 2 OS=Rattus norvegicus OX=10116 GN=Pyroxd2 PE=2 SV=1	9.31117e-05	2.151e-06	1.44708e-06	8.92992e-05	2.13925e-06	0.000195566	0.375543	1.56934	1115	0.553042
sp|Q6J2U6|RN114_RAT	E3 ubiquitin-protein ligase RNF114 OS=Rattus norvegicus OX=10116 GN=Rnf114 PE=2 SV=1	0.000236235	2.151e-06	1.44708e-06	0.000226563	2.13925e-06	0.000496174	0.376853	1.5957	1116	0.554474
sp|P14046|A1I3_RAT	Alpha-1-inhibitor 3 OS=Rattus norvegicus OX=10116 GN=A1i3 PE=1 SV=1	0.000293015	0.000294528	0.000158718	0.000298581	0.000276379	0.000307715	0.378599	0.242201	1117	0.556543
sp|P97840|LEG9_RAT	Galectin-9 OS=Rattus norvegicus OX=10116 GN=Lgals9 PE=2 SV=2	1.33575e-06	0.000230412	0.000165555	0.000146562	2.13925e-06	1.17e-06	0.379443	-1.40652	1118	0.557286
sp|Q5U1Z8|PREY_RAT	Protein preY, mitochondrial OS=Rattus norvegicus OX=10116 GN=Pyurf PE=3 SV=1	1.33575e-06	0.000728267	0.000523273	0.00046324	2.13925e-06	1.17e-06	0.379448	-1.42514	1119	0.556795
sp|Q6MGB5|DHB8_RAT	Estradiol 17-beta-dehydrogenase 8 OS=Rattus norvegicus OX=10116 GN=Hsd17b8 PE=1 SV=1	0.000522181	0.000419902	0.000678841	0.0010016	0.000562895	0.000548377	0.380928	0.382389	1120	0.558468
sp|Q8CFN2|CDC42_RAT	Cell division control protein 42 homolog OS=Rattus norvegicus OX=10116 GN=Cdc42 PE=1 SV=2	1.33575e-06	2.151e-06	0.00015342	1.44039e-06	0.000305319	0.000148722	0.381327	1.53748	1121	0.558554
sp|A9UMV8|H2AJ_RAT,sp|P02262|H2A1_RAT,sp|P0C169|H2A1C_RAT,sp|P0C170|H2A1E_RAT,sp|P0CC09|H2A2A_RAT,sp|Q00728|H2A4_RAT,sp|Q4FZT6|H2A3_RAT,sp|Q64598|H2A1F_RAT	Histone H2A.J OS=Rattus norvegicus OX=10116 GN=H2aj PE=2 SV=1,Histone H2A type 1 OS=Rattus norvegicus OX=10116 PE=1 SV=2,Histone H2A type 1-C OS=Rattus norvegicus OX=10116 PE=1 SV=2,Histone H2A type 1-E OS=Rattus norvegicus OX=10116 PE=1 SV=2,Histone H2A type 2-A OS=Rattus norvegicus OX=10116 GN=H2ac18 PE=1 SV=1,Histone H2A type 4 OS=Rattus norvegicus OX=10116 PE=2 SV=2,Histone H2A type 3 OS=Ratt…	0.000419364	0.000421529	0.000454315	0.000402193	0.000452062	0.00132121	0.3814	0.748137	1122	0.558163
sp|P35280|RAB8A_RAT	Ras-related protein Rab-8A OS=Rattus norvegicus OX=10116 GN=Rab8a PE=1 SV=2	0.000522685	0.000394038	0.000283124	0.000751925	0.000422579	0.00041168	0.382417	0.40271	1123	0.559153
sp|Q641X3|HEXA_RAT	Beta-hexosaminidase subunit alpha OS=Rattus norvegicus OX=10116 GN=Hexa PE=2 SV=1	0.000512291	0.000463443	0.000554987	0.000589578	0.000386564	0.000268996	0.383278	-0.297906	1124	0.559913
sp|P55159|PON1_RAT	Serum paraoxonase/arylesterase 1 OS=Rattus norvegicus OX=10116 GN=Pon1 PE=1 SV=3	0.000685748	0.000306351	0.000165089	0.000365372	2.13925e-06	0.00024005	0.386004	-0.929521	1125	0.563394
sp|Q00729|H2B1A_RAT	Histone H2B type 1-A OS=Rattus norvegicus OX=10116 GN=H2bc1 PE=1 SV=2	0.00106492	0.000856335	0.000461469	0.000817053	2.13925e-06	0.000671006	0.387367	-0.677108	1126	0.564881
sp|Q5M9I5|QCR6_RAT	Cytochrome b-c1 complex subunit 6, mitochondrial OS=Rattus norvegicus OX=10116 GN=Uqcrh PE=3 SV=1	0.00243137	0.00244392	0.00329251	0.00174886	0.00229332	0.00287251	0.388161	-0.240281	1127	0.565537
sp|Q5RKH0|GLYR1_RAT	Putative oxidoreductase GLYR1 OS=Rattus norvegicus OX=10116 GN=Glyr1 PE=1 SV=1	4.90017e-05	4.92548e-05	0.000159257	4.69953e-05	5.28224e-05	5.146e-05	0.38984	-0.767449	1128	0.56748
sp|P41123|RL13_RAT	60S ribosomal protein L13 OS=Rattus norvegicus OX=10116 GN=Rpl13 PE=1 SV=2	0.00115375	0.000644281	0.000277756	0.000614726	2.13925e-06	0.000538501	0.39043	-0.845306	1129	0.567835
sp|P06349|H1T_RAT	Histone H1t OS=Rattus norvegicus OX=10116 GN=H1-6 PE=1 SV=2	0.000130043	0.000392144	0.000140881	0.000374155	0.000280365	0.000273134	0.390115	0.48443	1130	0.566876
sp|Q5FVJ0|RUFY3_RAT	Protein RUFY3 OS=Rattus norvegicus OX=10116 GN=Rufy3 PE=1 SV=1	1.33575e-06	2.151e-06	6.24804e-05	0.000110624	6.21705e-05	1.17e-06	0.392404	1.39898	1131	0.569698
sp|Q80Z29|NAMPT_RAT	Nicotinamide phosphoribosyltransferase OS=Rattus norvegicus OX=10116 GN=Nampt PE=1 SV=1	5.50895e-05	0.000166122	0.000119362	5.28339e-05	0.00011877	5.78532e-05	0.390897	-0.569742	1132	0.567008
sp|B0BN85|SGT1_RAT	Protein SGT1 homolog OS=Rattus norvegicus OX=10116 GN=Sugt1 PE=2 SV=1	0.000483017	0.000404593	1.44708e-06	0.000154413	2.13925e-06	0.000253624	0.391071	-1.11603	1133	0.566759
sp|P58775|TPM2_RAT	Tropomyosin beta chain OS=Rattus norvegicus OX=10116 GN=Tpm2 PE=1 SV=1	1.33575e-06	9.57347e-05	0.000103181	9.1343e-05	0.000102669	0.000100021	0.396557	0.554168	1134	0.574203
sp|Q9QYL8|LYPA2_RAT	Acyl-protein thioesterase 2 OS=Rattus norvegicus OX=10116 GN=Lypla2 PE=1 SV=1	1.33575e-06	2.151e-06	0.000126854	0.000112301	0.00025245	1.17e-06	0.401836	1.48924	1135	0.581334
sp|P16638|ACLY_RAT	ATP-citrate synthase OS=Rattus norvegicus OX=10116 GN=Acly PE=1 SV=1	9.83599e-05	0.000296603	7.99181e-05	4.71662e-05	2.13925e-06	0.000180765	0.404688	-1.04549	1136	0.584945
sp|P29117|PPIF_RAT	Peptidyl-prolyl cis-trans isomerase F, mitochondrial OS=Rattus norvegicus OX=10116 GN=Ppif PE=1 SV=2	0.0022322	0.00316761	0.00369848	0.0030223	0.0045294	0.00330943	0.403904	0.255508	1137	0.583299
sp|P29315|RINI_RAT	Ribonuclease inhibitor OS=Rattus norvegicus OX=10116 GN=Rnh1 PE=1 SV=2	0.000415225	0.000476994	0.000321308	0.000398224	0.000383658	0.000249175	0.406106	-0.235084	1138	0.585963
sp|Q64640|ADK_RAT	Adenosine kinase OS=Rattus norvegicus OX=10116 GN=Adk PE=1 SV=3	0.000974062	0.000451889	0.000649381	0.000862319	0.00072693	0.000944242	0.40675	0.287785	1139	0.586376
sp|Q5I0C3|MCCA_RAT	Methylcrotonoyl-CoA carboxylase subunit alpha, mitochondrial OS=Rattus norvegicus OX=10116 GN=Mccc1 PE=1 SV=1	7.56614e-05	7.60521e-05	1.44708e-06	0.00021769	0.000122341	1.17e-06	0.404919	1.15558	1140	0.583226
sp|P16232|DHI1_RAT	Corticosteroid 11-beta-dehydrogenase isozyme 1 OS=Rattus norvegicus OX=10116 GN=Hsd11b1 PE=1 SV=2	0.00075136	0.000472025	0.000813981	0.000630521	0.000506215	0.00059179	0.407516	-0.237163	1141	0.586451
sp|O88989|MDHC_RAT	Malate dehydrogenase, cytoplasmic OS=Rattus norvegicus OX=10116 GN=Mdh1 PE=1 SV=3	0.000809849	0.000895434	0.00078961	0.0010097	0.000349197	0.000595334	0.408622	-0.35238	1142	0.587529
sp|Q62733|LAP2_RAT	Lamina-associated polypeptide 2, isoform beta OS=Rattus norvegicus OX=10116 GN=Tmpo PE=1 SV=3	0.000359057	0.000601519	0.000518643	5.73925e-05	0.000580579	0.00037707	0.409356	-0.543296	1143	0.588069
sp|Q9Z1A6|VIGLN_RAT	Vigilin OS=Rattus norvegicus OX=10116 GN=Hdlbp PE=1 SV=1	0.000917276	0.00090057	0.000623966	0.0008388	0.000344929	0.000761673	0.41112	-0.327884	1144	0.590087
sp|Q9WVK7|HCDH_RAT	Hydroxyacyl-coenzyme A dehydrogenase, mitochondrial OS=Rattus norvegicus OX=10116 GN=Hadh PE=2 SV=1	0.001206	0.000952468	0.000839904	0.000908776	0.00102146	0.000633253	0.411249	-0.226074	1145	0.589756
sp|P36506|MP2K2_RAT	Dual specificity mitogen-activated protein kinase kinase 2 OS=Rattus norvegicus OX=10116 GN=Map2k2 PE=1 SV=1	1.33575e-06	0.000135943	0.000293033	0.000259414	0.00014579	0.000284059	0.412405	0.679673	1146	0.590898
sp|Q9QXY4|OGFR_RAT	Opioid growth factor receptor OS=Rattus norvegicus OX=10116 GN=Ogfr PE=1 SV=1	9.32723e-05	0.000281262	0.000202092	0.00013418	0.00020109	4.89757e-05	0.41175	-0.585609	1147	0.589445
sp|P56522|ADRO_RAT	NADPH:adrenodoxin oxidoreductase, mitochondrial OS=Rattus norvegicus OX=10116 GN=Fdxr PE=1 SV=1	0.000492795	0.000440302	0.000593184	0.000420104	0.000236097	0.000575019	0.412939	-0.309932	1148	0.590633
sp|P29266|3HIDH_RAT	3-hydroxyisobutyrate dehydrogenase, mitochondrial OS=Rattus norvegicus OX=10116 GN=Hibadh PE=1 SV=3	0.000968918	0.000973921	0.000787253	0.00100668	0.000870388	0.00110232	0.413283	0.126067	1149	0.59061
sp|Q6AY96|T2FA_RAT	General transcription factor IIF subunit 1 OS=Rattus norvegicus OX=10116 GN=Gtf2f1 PE=1 SV=1	0.000159738	0.000214084	0.000115367	1.44039e-06	0.00022959	5.59172e-05	0.416585	-0.769603	1150	0.594811
sp|P47942|DPYL2_RAT	Dihydropyrimidinase-related protein 2 OS=Rattus norvegicus OX=10116 GN=Dpysl2 PE=1 SV=1	1.33575e-06	9.50652e-05	1.44708e-06	0.000136056	2.13925e-06	9.93215e-05	0.410476	1.27942	1151	0.585579
sp|Q6IMY8|HNRPU_RAT	Heterogeneous nuclear ribonucleoprotein U OS=Rattus norvegicus OX=10116 GN=Hnrnpu PE=1 SV=1	0.000542335	0.000272568	0.000734419	0.000585145	0.000657699	0.000676332	0.418466	0.30885	1152	0.596459
sp|P80349|FUC3_RAT	Fuctinin-3 (Fragment) OS=Rattus norvegicus OX=10116 PE=1 SV=1	0.00138713	0.00209143	0.0022541	0.000665165	0.00149528	0.00218507	0.418923	-0.399677	1153	0.596592
sp|P21794|HIP70_RAT	Hormone-induced protein 70 kDa (Fragment) OS=Rattus norvegicus OX=10116 PE=1 SV=1	0.00142363	0.00143098	0.00154228	1.44039e-06	0.00153463	0.00149505	0.419185	-0.536632	1154	0.596448
sp|P12839|NFM_RAT,sp|P16884|NFH_RAT,sp|P19527|NFL_RAT,sp|P23565|AINX_RAT	Neurofilament medium polypeptide OS=Rattus norvegicus OX=10116 GN=Nefm PE=1 SV=4,Neurofilament heavy polypeptide OS=Rattus norvegicus OX=10116 GN=Nefh PE=1 SV=4,Neurofilament light polypeptide OS=Rattus norvegicus OX=10116 GN=Nefl PE=1 SV=3,Alpha-internexin OS=Rattus norvegicus OX=10116 GN=Ina PE=1 SV=2	3.19728e-05	3.21379e-05	3.46375e-05	1.44039e-06	3.44657e-05	3.35768e-05	0.421295	-0.507096	1155	0.598931
sp|Q01460|DIAC_RAT	Di-N-acetylchitobiase OS=Rattus norvegicus OX=10116 GN=Ctbs PE=1 SV=1	0.000221109	0.000518584	0.000479073	0.00042411	0.000635596	0.000464402	0.42089	0.322545	1156	0.597838
sp|P04639|APOA1_RAT	Apolipoprotein A-I OS=Rattus norvegicus OX=10116 GN=Apoa1 PE=1 SV=2	0.00208872	0.00199453	0.00124454	0.00190304	0.00191384	0.00230318	0.425219	0.200008	1157	0.603466
sp|Q66H71|CPPED_RAT	Serine/threonine-protein phosphatase CPPED1 OS=Rattus norvegicus OX=10116 GN=Cpped1 PE=1 SV=1	0.000520172	0.000610002	0.000845288	0.00074831	0.000934551	0.000637313	0.426888	0.232043	1158	0.605311
sp|Q5XIE3|RM11_RAT	39S ribosomal protein L11, mitochondrial OS=Rattus norvegicus OX=10116 GN=Mrpl11 PE=2 SV=1	0.000532984	0.000267868	0.000144351	0.000383371	2.13925e-06	0.000139931	0.430916	-0.847098	1159	0.610495
sp|O88600|HSP74_RAT	Heat shock 70 kDa protein 4 OS=Rattus norvegicus OX=10116 GN=Hspa4 PE=1 SV=1	0.000772827	0.000776818	0.000523273	0.000741184	0.00055539	0.000473432	0.430805	-0.22791	1160	0.609812
sp|Q9Z0V5|PRDX4_RAT	Peroxiredoxin-4 OS=Rattus norvegicus OX=10116 GN=Prdx4 PE=2 SV=1	0.00188253	0.00189225	0.00171741	0.0016154	0.0019225	0.00166482	0.433088	-0.0781147	1161	0.612516
sp|Q9R1T1|BAF_RAT	Barrier-to-autointegration factor OS=Rattus norvegicus OX=10116 GN=Banf1 PE=1 SV=1	1.33575e-06	0.00122196	0.000987752	0.00116591	0.00163809	0.000638336	0.43406	0.638655	1162	0.613362
sp|O08839|BIN1_RAT	Myc box-dependent-interacting protein 1 OS=Rattus norvegicus OX=10116 GN=Bin1 PE=1 SV=1	0.000184007	0.000138718	1.44708e-06	0.000132354	0.000148765	0.000193238	0.435427	0.549218	1163	0.614765
sp|Q64057|AL7A1_RAT	Alpha-aminoadipic semialdehyde dehydrogenase OS=Rattus norvegicus OX=10116 GN=Aldh7a1 PE=1 SV=2	0.000953488	0.000655756	0.000761125	0.000721932	0.000378675	0.000843219	0.435295	-0.286213	1164	0.61405
sp|P46953|3HAO_RAT	3-hydroxyanthranilate 3,4-dioxygenase OS=Rattus norvegicus OX=10116 GN=Haao PE=1 SV=2	0.000662038	0.000475326	1.44708e-06	0.000272113	2.13925e-06	0.000297964	0.435526	-0.992895	1165	0.613849
sp|P35565|CALX_RAT	Calnexin OS=Rattus norvegicus OX=10116 GN=Canx PE=1 SV=1	0.00128151	0.00110411	0.0011404	0.00131682	0.00118408	0.0012016	0.437444	0.0704649	1166	0.616023
sp|Q04931|SSRP1_RAT	FACT complex subunit SSRP1 OS=Rattus norvegicus OX=10116 GN=Ssrp1 PE=1 SV=2	0.000114453	7.66957e-05	1.44708e-06	1.44039e-06	2.13925e-06	8.01296e-05	0.438753	-1.20211	1167	0.617338
sp|P10867|GGLO_RAT	L-gulonolactone oxidase OS=Rattus norvegicus OX=10116 GN=Gulo PE=1 SV=3	0.00012295	0.000123585	0.000199795	0.000117916	0.000132536	0.000129118	0.438497	-0.233745	1168	0.616448
sp|P69897|TBB5_RAT	Tubulin beta-5 chain OS=Rattus norvegicus OX=10116 GN=Tubb5 PE=1 SV=1	0.00213224	0.00195954	0.00184796	0.00198651	0.00203581	0.00217523	0.439277	0.0612968	1169	0.617017
sp|O70351|HCD2_RAT	3-hydroxyacyl-CoA dehydrogenase type-2 OS=Rattus norvegicus OX=10116 GN=Hsd17b10 PE=1 SV=3	0.00279817	0.00187508	0.00258228	0.00198785	0.00189918	0.0025032	0.43957	-0.183213	1170	0.616901
sp|Q63945|SET_RAT	Protein SET OS=Rattus norvegicus OX=10116 GN=Set PE=2 SV=2	0.00056157	0.000658548	0.000709769	0.000359051	0.000605356	0.000688033	0.439858	-0.223919	1171	0.616778
sp|Q5BJQ0|COQ8A_RAT	Atypical kinase COQ8A, mitochondrial OS=Rattus norvegicus OX=10116 GN=Coq8a PE=2 SV=1	0.00020839	0.000251359	0.000270909	0.000199857	0.000269565	0.000175075	0.443102	-0.18102	1172	0.620796
sp|Q6P686|OSTF1_RAT	Osteoclast-stimulating factor 1 OS=Rattus norvegicus OX=10116 GN=Ostf1 PE=1 SV=1	0.000884779	0.000762298	0.000684657	0.000606108	0.00109002	0.0010619	0.443516	0.242235	1173	0.620847
sp|Q8VHK7|HDGF_RAT	Hepatoma-derived growth factor OS=Rattus norvegicus OX=10116 GN=Hdgf PE=1 SV=2	0.00136957	0.00149136	0.00222557	0.00131349	0.00135332	0.00167799	0.443718	-0.227382	1174	0.620601
sp|P41777|NOLC1_RAT	Nucleolar and coiled-body phosphoprotein 1 OS=Rattus norvegicus OX=10116 GN=Nolc1 PE=1 SV=2	1.33575e-06	2.151e-06	8.3248e-05	0.000110546	8.28352e-05	1.17e-06	0.44651	1.16547	1175	0.623974
sp|Q91ZS3|CAB45_RAT	45 kDa calcium-binding protein OS=Rattus norvegicus OX=10116 GN=Sdf4 PE=1 SV=1	0.000149856	0.000225944	0.000162345	0.00028744	2.13925e-06	1.17e-06	0.448007	-0.888222	1176	0.625534
sp|Q8CHM7|HACL1_RAT	2-hydroxyacyl-CoA lyase 1 OS=Rattus norvegicus OX=10116 GN=Hacl1 PE=1 SV=1	0.000279335	0.000514759	0.000554796	0.000357197	0.000451673	0.000293349	0.446357	-0.291363	1177	0.6227
sp|Q62826|HNRPM_RAT	Heterogeneous nuclear ribonucleoprotein M OS=Rattus norvegicus OX=10116 GN=Hnrnpm PE=1 SV=4	0.00117604	0.000945692	0.00089184	0.000714329	0.000591611	0.00119387	0.447147	-0.269655	1178	0.623273
sp|Q5U206|CALL3_RAT	Calmodulin-like protein 3 OS=Rattus norvegicus OX=10116 GN=Calml3 PE=2 SV=1	0.00127076	0.00164227	0.00137667	0.00139283	0.00176122	0.00152515	0.447544	0.125389	1179	0.623297
sp|Q68FT5|BHMT2_RAT	S-methylmethionine--homocysteine S-methyltransferase BHMT2 OS=Rattus norvegicus OX=10116 GN=Bhmt2 PE=2 SV=1	7.4515e-05	0.0001498	0.000242176	0.000285856	0.000722925	1.17e-06	0.447722	1.11436	1180	0.623017
sp|Q10728|MYPT1_RAT	Protein phosphatase 1 regulatory subunit 12A OS=Rattus norvegicus OX=10116 GN=Ppp1r12a PE=1 SV=2	5.24205e-05	7.90367e-05	1.44708e-06	1.44039e-06	5.65077e-05	1.17e-06	0.448043	-1.16872	1181	0.622935
sp|P97615|THIOM_RAT	Thioredoxin, mitochondrial OS=Rattus norvegicus OX=10116 GN=Txn2 PE=2 SV=1	0.000488837	0.000655148	0.00088263	0.000625095	0.0014052	0.00068448	0.451853	0.421763	1182	0.627701
sp|P62193|PRS4_RAT	26S proteasome regulatory subunit 4 OS=Rattus norvegicus OX=10116 GN=Psmc1 PE=1 SV=1	0.000676224	0.000679716	0.000133197	0.000294789	2.13925e-06	0.00058103	0.455468	-0.762252	1183	0.632189
sp|P56571|ES1_RAT	ES1 protein homolog, mitochondrial OS=Rattus norvegicus OX=10116 PE=1 SV=2	0.00122025	0.00122656	0.00110163	0.000487621	0.00142501	0.000961103	0.457311	-0.304255	1184	0.63421
sp|Q8K3X8|HSBP1_RAT	Heat shock factor-binding protein 1 OS=Rattus norvegicus OX=10116 GN=Hsbp1 PE=3 SV=1	0.00142363	0.000715491	0.00077114	1.44039e-06	0.00153463	1.17e-06	0.459199	-0.920805	1185	0.636291
sp|P63100|CANB1_RAT	Calcineurin subunit B type 1 OS=Rattus norvegicus OX=10116 GN=Ppp3r1 PE=1 SV=2	1.33575e-06	2.151e-06	0.000689489	0.00045779	0.00137214	1.17e-06	0.459197	1.40183	1186	0.635752
sp|P22791|HMCS2_RAT	Hydroxymethylglutaryl-CoA synthase, mitochondrial OS=Rattus norvegicus OX=10116 GN=Hmgcs2 PE=1 SV=2	0.0019701	0.00171267	0.00173051	0.00168517	0.00172193	0.00178935	0.459599	-0.0589773	1187	0.635772
sp|Q63862|MYH11_RAT	Myosin-11 (Fragments) OS=Rattus norvegicus OX=10116 GN=Myh11 PE=1 SV=3	0.000122301	2.151e-06	0.000110412	0.000508272	8.78914e-05	2.14061e-05	0.462446	1.39478	1188	0.639171
sp|B0K019|BAG1_RAT	BAG family molecular chaperone regulator 1 OS=Rattus norvegicus OX=10116 GN=Bag1 PE=2 SV=1	0.000226667	0.000227838	8.18528e-05	0.000144924	0.000244341	0.000317385	0.460644	0.397799	1189	0.636146
sp|P84245|H33_RAT	Histone H3.3 OS=Rattus norvegicus OX=10116 GN=H3-3b PE=1 SV=2	1.33575e-06	0.0011995	1.44708e-06	1.44039e-06	2.13925e-06	0.000208867	0.461277	-2.5006	1190	0.636485
sp|Q9ES38|S27A5_RAT	Bile acyl-CoA synthetase OS=Rattus norvegicus OX=10116 GN=Slc27a5 PE=1 SV=1	0.00027441	0.000315231	0.000212343	0.000225578	0.000253548	0.000247008	0.461605	-0.143337	1191	0.636403
sp|Q8K3E7|DPY30_RAT	Protein dpy-30 homolog OS=Rattus norvegicus OX=10116 GN=Dpy30 PE=1 SV=1	0.000273222	0.000549265	0.000591986	0.000524069	0.000294525	0.000286929	0.461693	-0.355536	1192	0.63599
sp|P11762|LEG1_RAT	Galectin-1 OS=Rattus norvegicus OX=10116 GN=Lgals1 PE=1 SV=2	0.000801451	0.000402795	0.000868246	0.000768635	2.13925e-06	0.000631243	0.465165	-0.563862	1193	0.640236
sp|P13635|CERU_RAT	Ceruloplasmin OS=Rattus norvegicus OX=10116 GN=Cp PE=1 SV=3	7.6626e-05	0.000102696	1.44708e-06	1.44039e-06	2.13925e-06	8.04701e-05	0.466617	-1.10483	1194	0.641696
sp|P11598|PDIA3_RAT	Protein disulfide-isomerase A3 OS=Rattus norvegicus OX=10116 GN=Pdia3 PE=1 SV=2	0.00342799	0.00279962	0.00226303	0.00261983	0.00230954	0.00269997	0.466445	-0.154315	1195	0.640922
sp|Q562C6|LZTL1_RAT	Leucine zipper transcription factor-like protein 1 OS=Rattus norvegicus OX=10116 GN=Lztfl1 PE=2 SV=1	0.00018093	2.151e-06	1.44708e-06	8.67606e-05	2.13925e-06	0.000475016	0.466627	1.61164	1196	0.640637
sp|P02696|RET1_RAT	Retinol-binding protein 1 OS=Rattus norvegicus OX=10116 GN=Rbp1 PE=1 SV=2	0.00260471	0.00161118	0.00195355	0.00192159	0.00259182	0.00252497	0.467347	0.190102	1197	0.641089
sp|P00786|CATH_RAT	Pro-cathepsin H OS=Rattus norvegicus OX=10116 GN=Ctsh PE=1 SV=1	0.000731053	0.000653181	0.00105597	0.000623217	0.000612931	0.000853031	0.468195	-0.224068	1198	0.641716
sp|P17136|RSMB_RAT,sp|P63164|RSMN_RAT	Small nuclear ribonucleoprotein-associated protein B OS=Rattus norvegicus OX=10116 GN=Snrpb PE=2 SV=2,Small nuclear ribonucleoprotein-associated protein N OS=Rattus norvegicus OX=10116 GN=Snrpn PE=2 SV=1	0.000351285	0.000353099	0.000380562	0.000336902	0.0005049	0.000368908	0.468235	0.158229	1199	0.641236
sp|Q3B8Q1|DDX21_RAT	Nucleolar RNA helicase 2 OS=Rattus norvegicus OX=10116 GN=Ddx21 PE=2 SV=1	0.000207537	0.000139072	0.000299778	0.000165866	0.000186432	0.000181624	0.469519	-0.275771	1200	0.642459
sp|P29419|ATP5I_RAT	ATP synthase subunit e, mitochondrial OS=Rattus norvegicus OX=10116 GN=Atp5me PE=1 SV=3	0.0026668	0.00191469	0.00123817	0.00146149	0.00123203	0.00200042	0.470486	-0.310137	1201	0.643245
sp|Q4KLG9|ZFN2B_RAT	AN1-type zinc finger protein 2B OS=Rattus norvegicus OX=10116 GN=Zfand2b PE=1 SV=1	1.33575e-06	0.000211585	0.000228041	0.000201879	2.13925e-06	1.17e-06	0.471288	-1.10371	1202	0.643807
sp|Q63190|EMD_RAT	Emerin OS=Rattus norvegicus OX=10116 GN=Emd PE=1 SV=1	0.000208069	0.000104572	0.00045082	9.97747e-05	2.13925e-06	0.000327761	0.473743	-0.829309	1203	0.646621
sp|P35427|RL13A_RAT	60S ribosomal protein L13a OS=Rattus norvegicus OX=10116 GN=Rpl13a PE=1 SV=2	0.000133246	2.151e-06	0.000144351	0.00012779	2.13925e-06	1.17e-06	0.469426	-1.09347	1204	0.640197
sp|P97690|SMC3_RAT	Structural maintenance of chromosomes protein 3 OS=Rattus norvegicus OX=10116 GN=Smc3 PE=1 SV=1	4.54223e-05	4.56568e-05	1.44708e-06	4.35624e-05	2.44819e-05	7.15515e-05	0.478067	0.593322	1205	0.65144
sp|D3ZHA0|FLNC_RAT	Filamin-C OS=Rattus norvegicus OX=10116 GN=Flnc PE=1 SV=1	2.97677e-05	3.98953e-05	4.29982e-05	4.75815e-05	2.13925e-05	2.08407e-05	0.475659	-0.326968	1206	0.647622
sp|P05065|ALDOA_RAT	Fructose-bisphosphate aldolase A OS=Rattus norvegicus OX=10116 GN=Aldoa PE=1 SV=2	0.000148621	0.000298776	0.000483021	0.000142535	8.01043e-05	0.000390191	0.47781	-0.60239	1207	0.650011
sp|P23680|SAMP_RAT	Serum amyloid P-component OS=Rattus norvegicus OX=10116 GN=Apcs PE=2 SV=2	0.00106772	0.000715491	0.00102819	0.000682669	0.00102309	0.000747525	0.477912	-0.196576	1208	0.649612
sp|B3DMA2|ACD11_RAT	Acyl-CoA dehydrogenase family member 11 OS=Rattus norvegicus OX=10116 GN=Acad11 PE=1 SV=1	0.000277781	0.000244314	0.000338549	0.000299708	0.00011229	0.000291717	0.479273	-0.290425	1209	0.650923
sp|Q9R063|PRDX5_RAT	Peroxiredoxin-5, mitochondrial OS=Rattus norvegicus OX=10116 GN=Prdx5 PE=1 SV=1	0.00330175	0.00268057	0.00220119	0.00243581	0.00205338	0.00280059	0.481974	-0.166845	1210	0.654051
sp|Q9Z2L0|VDAC1_RAT	Voltage-dependent anion-selective channel protein 1 OS=Rattus norvegicus OX=10116 GN=Vdac1 PE=1 SV=4	0.000955794	0.000768583	0.000414181	0.000916658	0.00113335	0.000602246	0.482344	0.31058	1211	0.654012
sp|B0BN18|PFD2_RAT	Prefoldin subunit 2 OS=Rattus norvegicus OX=10116 GN=Pfdn2 PE=2 SV=1	0.000351285	0.000529649	0.000380562	0.000505352	0.000378675	0.000553362	0.483078	0.188315	1212	0.654467
sp|Q5U2U2|CRKL_RAT	Crk-like protein OS=Rattus norvegicus OX=10116 GN=Crkl PE=1 SV=1	0.000178541	2.151e-06	0.000290132	0.000684922	2.13925e-06	0.000281247	0.483934	1.04028	1213	0.655086
sp|P55051|FABP7_RAT	Fatty acid-binding protein, brain OS=Rattus norvegicus OX=10116 GN=Fabp7 PE=1 SV=2	0.00143441	0.000823898	0.00110997	0.00137568	0.000662681	0.000645589	0.487049	-0.327656	1214	0.65876
sp|P08503|ACADM_RAT	Medium-chain specific acyl-CoA dehydrogenase, mitochondrial OS=Rattus norvegicus OX=10116 GN=Acadm PE=1 SV=1	0.00089949	0.0010333	0.000904853	0.00086266	0.000484812	0.00107956	0.487544	-0.225498	1215	0.658887
sp|P07151|B2MG_RAT	Beta-2-microglobulin OS=Rattus norvegicus OX=10116 GN=B2m PE=1 SV=1	0.000909209	0.00114238	0.00123123	0.000871981	0.00147015	0.00143223	0.490184	0.201298	1216	0.66191
sp|Q9QZA2|PDC6I_RAT	Programmed cell death 6-interacting protein OS=Rattus norvegicus OX=10116 GN=Pdcd6ip PE=1 SV=2	0.00015492	0.00015572	6.71324e-05	8.91458e-05	2.13925e-06	0.000162691	0.494295	-0.572819	1217	0.666912
sp|P20788|UCRI_RAT	Cytochrome b-c1 complex subunit Rieske, mitochondrial OS=Rattus norvegicus OX=10116 GN=Uqcrfs1 PE=1 SV=2	0.00108591	0.00109151	0.00128336	0.0012308	0.000957744	0.00103671	0.491906	-0.101684	1218	0.663145
sp|Q63108|EST1E_RAT	Carboxylesterase 1E OS=Rattus norvegicus OX=10116 GN=Ces1e PE=1 SV=1	1.33575e-06	2.151e-06	5.22341e-05	0.000231207	2.13925e-06	1.17e-06	0.489212	2.0734	1219	0.658971
sp|Q4KMA2|RD23B_RAT	UV excision repair protein RAD23 homolog B OS=Rattus norvegicus OX=10116 GN=Rad23b PE=1 SV=1	0.0014991	0.00157236	0.00162404	0.00193779	0.0014052	0.0017112	0.492637	0.106206	1220	0.66304
sp|P19629|LDHC_RAT	L-lactate dehydrogenase C chain OS=Rattus norvegicus OX=10116 GN=Ldhc PE=1 SV=3	8.14728e-05	8.18935e-05	1.44708e-06	7.81368e-05	2.13925e-06	1.17e-06	0.493849	-1.01692	1221	0.664128
sp|Q6AY09|HNRH2_RAT	Heterogeneous nuclear ribonucleoprotein H2 OS=Rattus norvegicus OX=10116 GN=Hnrnph2 PE=1 SV=1	0.000963883	0.00108997	0.000978952	0.00109774	0.000909158	0.000822444	0.495153	-0.100184	1222	0.665337
sp|P14942|GSTA4_RAT,sp|Q6AXY0|GSTA6_RAT	Glutathione S-transferase alpha-4 OS=Rattus norvegicus OX=10116 GN=Gsta4 PE=1 SV=2,Glutathione S-transferase A6 OS=Rattus norvegicus OX=10116 GN=Gsta6 PE=1 SV=1	0.000243684	0.000122471	0.000131997	0.000233707	0.000131342	0.000255909	0.495426	0.317908	1223	0.665159
sp|P62902|RL31_RAT	60S ribosomal protein L31 OS=Rattus norvegicus OX=10116 GN=Rpl31 PE=2 SV=1	0.00108196	0.000870037	0.000937706	0.000830126	0.000466528	0.00113624	0.495711	-0.248249	1224	0.664998
sp|Q4V8B0|OXR1_RAT	Oxidation resistance protein 1 OS=Rattus norvegicus OX=10116 GN=Oxr1 PE=1 SV=3	6.44791e-05	0.000129624	0.000209559	0.000216436	2.13925e-06	1.17e-06	0.501038	-0.877314	1225	0.671596
sp|Q4KM73|KCY_RAT	UMP-CMP kinase OS=Rattus norvegicus OX=10116 GN=Cmpk1 PE=1 SV=2	0.00110404	0.00166461	0.00119605	0.000794125	0.000892591	0.00159421	0.497612	-0.273109	1226	0.666459
sp|Q5U211|SNX3_RAT	Sorting nexin-3 OS=Rattus norvegicus OX=10116 GN=Snx3 PE=1 SV=1	0.000834845	0.000839156	0.000180885	0.000480397	2.13925e-06	0.000701381	0.498315	-0.647761	1227	0.666857
sp|Q5BJP3|UFM1_RAT	Ubiquitin-fold modifier 1 OS=Rattus norvegicus OX=10116 GN=Ufm1 PE=3 SV=1	0.00254578	0.00255893	0.00275796	0.00244155	0.00343035	0.0026735	0.498809	0.120127	1228	0.666975
sp|P08932|KNT2_RAT	T-kininogen 2 OS=Rattus norvegicus OX=10116 PE=1 SV=2	0.000188714	0.000316147	0.000204442	0.000180987	0.000271237	0.000462422	0.498888	0.366813	1229	0.666537
sp|P25113|PGAM1_RAT	Phosphoglycerate mutase 1 OS=Rattus norvegicus OX=10116 GN=Pgam1 PE=1 SV=4	0.000745444	0.000321126	0.00115367	0.00122558	0.000573976	0.00111834	0.499766	0.394212	1230	0.667167
sp|Q6AYT3|RTCB_RAT	RNA-splicing ligase RtcB homolog OS=Rattus norvegicus OX=10116 GN=Rtcb PE=2 SV=1	0.000267812	0.000161517	1.44708e-06	0.000410953	0.000115477	0.000168748	0.50144	0.690448	1231	0.668858
sp|Q920D2|DYR_RAT	Dihydrofolate reductase OS=Rattus norvegicus OX=10116 GN=Dhfr PE=1 SV=3	0.000867881	0.000726969	0.000470106	0.000693621	0.000467775	0.000607614	0.501716	-0.22317	1232	0.668683
sp|Q5XFX0|TAGL2_RAT	Transgelin-2 OS=Rattus norvegicus OX=10116 GN=Tagln2 PE=1 SV=1	0.00135924	0.00122964	0.000589011	0.000782153	0.000293045	0.00128469	0.504588	-0.429351	1233	0.671965
sp|P09527|RAB7A_RAT	Ras-related protein Rab-7a OS=Rattus norvegicus OX=10116 GN=Rab7a PE=1 SV=2	0.00117604	0.00105077	0.00127406	0.00187981	0.00126774	0.000960587	0.506575	0.230773	1234	0.674065
sp|Q2EJA0|YAP1_RAT	Transcriptional coactivator YAP1 OS=Rattus norvegicus OX=10116 GN=Yap1 PE=1 SV=1	0.000173021	0.000289858	0.000187441	0.000165937	0.000248682	0.000121134	0.506692	-0.279582	1235	0.673675
sp|P52944|PDLI1_RAT	PDZ and LIM domain protein 1 OS=Rattus norvegicus OX=10116 GN=Pdlim1 PE=1 SV=4	0.00115806	0.00108089	0.00134419	0.00158663	0.00133752	0.00104242	0.507093	0.146668	1236	0.673663
sp|Q68FY1|NUP35_RAT	Nucleoporin NUP35 OS=Rattus norvegicus OX=10116 GN=Nup35 PE=1 SV=1	8.32276e-05	0.000250972	0.000180328	0.000239459	8.97169e-05	1.17e-06	0.509404	-0.63927	1237	0.676185
sp|Q9Z270|VAPA_RAT	Vesicle-associated membrane protein-associated protein A OS=Rattus norvegicus OX=10116 GN=Vapa PE=1 SV=3	0.00152083	0.00174706	0.00105916	0.00145855	0.000936803	0.00136896	0.508536	-0.200993	1238	0.674488
sp|P18445|RL27A_RAT	60S ribosomal protein L27a OS=Rattus norvegicus OX=10116 GN=Rpl27a PE=1 SV=3	0.000731053	0.000551121	1.44708e-06	0.00035056	2.13925e-06	0.000383864	0.507947	-0.801339	1239	0.673163
sp|P14668|ANXA5_RAT	Annexin A5 OS=Rattus norvegicus OX=10116 GN=Anxa5 PE=1 SV=3	8.4793e-05	2.151e-06	1.44708e-06	8.13211e-05	9.14043e-05	1.17e-06	0.513029	0.976247	1240	0.679349
sp|P62959|HINT1_RAT	Histidine triad nucleotide-binding protein 1 OS=Rattus norvegicus OX=10116 GN=Hint1 PE=1 SV=5	0.00150272	0.0012947	0.000930264	0.00144119	0.00115706	0.00157811	0.512342	0.163968	1241	0.677893
sp|P07895|SODM_RAT	Superoxide dismutase [Mn], mitochondrial OS=Rattus norvegicus OX=10116 GN=Sod2 PE=1 SV=2	0.000731053	0.000857299	0.000923978	0.000584266	0.000919396	0.000767728	0.513656	-0.145451	1242	0.679084
sp|Q6PEC4|SKP1_RAT	S-phase kinase-associated protein 1 OS=Rattus norvegicus OX=10116 GN=Skp1 PE=1 SV=3	0.00132756	0.00116761	0.00197752	0.0012732	0.00143107	0.00121989	0.513989	-0.188762	1243	0.678978
sp|Q6AYL5|SF3B4_RAT	Splicing factor 3B subunit 4 OS=Rattus norvegicus OX=10116 GN=Sf3b4 PE=2 SV=1	0.000127589	0.000192372	0.000207335	0.000305913	0.000206306	0.00013399	0.514728	0.293388	1244	0.679408
sp|Q5U317|FIP1_RAT	Pre-mRNA 3'-end-processing factor FIP1 OS=Rattus norvegicus OX=10116 GN=Fip1l1 PE=1 SV=1	0.000151393	0.00030435	0.000273352	9.67964e-05	0.000271996	0.000211985	0.515806	-0.328124	1245	0.680284
sp|G3V9R8|HNRPC_RAT	Heterogeneous nuclear ribonucleoprotein C OS=Rattus norvegicus OX=10116 GN=Hnrnpc PE=1 SV=2	0.00145229	0.00155103	0.00127833	0.00130578	0.00117415	0.00152515	0.516598	-0.0963397	1246	0.680782
sp|P05765|RS21_RAT	40S ribosomal protein S21 OS=Rattus norvegicus OX=10116 GN=Rps21 PE=1 SV=1	0.00325891	0.00425846	0.00317747	0.00406311	0.00281041	0.00581808	0.517541	0.24696	1247	0.681477
sp|Q9EQ76|FMO3_RAT	Dimethylaniline monooxygenase [N-oxide-forming] 3 OS=Rattus norvegicus OX=10116 GN=Fmo3 PE=1 SV=1	0.000254698	2.151e-06	1.44708e-06	0.000195416	5.49115e-05	0.000213981	0.522589	0.846054	1248	0.687574
sp|P11884|ALDH2_RAT	Aldehyde dehydrogenase, mitochondrial OS=Rattus norvegicus OX=10116 GN=Aldh2 PE=1 SV=1	0.00166776	0.00162398	0.00141153	0.00159947	0.0011798	0.00158723	0.519096	-0.107186	1249	0.682431
sp|P20767|LAC2_RAT	Ig lambda-2 chain C region OS=Rattus norvegicus OX=10116 PE=4 SV=1	1.33575e-06	0.000522858	1.44708e-06	0.000498874	2.13925e-06	0.000546268	0.518608	0.994498	1250	0.681243
sp|P12007|IVD_RAT	Isovaleryl-CoA dehydrogenase, mitochondrial OS=Rattus norvegicus OX=10116 GN=Ivd PE=1 SV=2	0.000701742	0.000384745	0.000414669	0.000550643	0.000481382	0.000736946	0.519693	0.236837	1251	0.682123
sp|P16296|FA9_RAT	Coagulation factor IX OS=Rattus norvegicus OX=10116 GN=F9 PE=2 SV=2	0.000175643	5.88499e-05	6.34271e-05	1.44039e-06	0.000126225	0.000491878	0.519608	1.05628	1252	0.681466
sp|Q9WVK3|PECR_RAT	Peroxisomal trans-2-enoyl-CoA reductase OS=Rattus norvegicus OX=10116 GN=Pecr PE=2 SV=1	0.000892705	0.00116651	0.000773685	0.001113	0.000769848	0.00140623	0.523142	0.215405	1253	0.685554
sp|O55156|CLIP2_RAT	CAP-Gly domain-containing linker protein 2 OS=Rattus norvegicus OX=10116 GN=Clip2 PE=1 SV=1	2.58594e-05	2.151e-06	2.80146e-05	1.44039e-06	2.13925e-06	2.71567e-05	0.515815	-0.866126	1254	0.675414
sp|F1LU71|AUHM_RAT	Methylglutaconyl-CoA hydratase, mitochondrial OS=Rattus norvegicus OX=10116 GN=Auh PE=1 SV=2	0.000257609	2.151e-06	0.000465132	0.000164707	9.2565e-05	0.000180355	0.521923	-0.728062	1255	0.682866
sp|Q62703|RCN2_RAT	Reticulocalbin-2 OS=Rattus norvegicus OX=10116 GN=Rcn2 PE=1 SV=2	1.33575e-06	2.151e-06	0.000183146	1.44039e-06	0.000182237	0.000177537	0.530409	0.952658	1256	0.693417
sp|P50408|VATF_RAT	V-type proton ATPase subunit F OS=Rattus norvegicus OX=10116 GN=Atp6v1f PE=1 SV=1	1.33575e-06	2.151e-06	0.000246246	1.44039e-06	0.000245025	0.000238705	0.530123	0.958106	1257	0.692491
sp|P08011|MGST1_RAT	Microsomal glutathione S-transferase 1 OS=Rattus norvegicus OX=10116 GN=Mgst1 PE=1 SV=3	1.33575e-06	0.000175411	0.000189054	0.000502092	0.000188116	1.17e-06	0.530271	0.91842	1258	0.692134
sp|Q9ESH6|GLRX1_RAT	Glutaredoxin-1 OS=Rattus norvegicus OX=10116 GN=Glrx PE=3 SV=3	0.00101118	0.000762298	0.000821588	0.00072733	0.00109002	0.0010619	0.531783	0.149925	1259	0.693557
sp|P45592|COF1_RAT	Cofilin-1 OS=Rattus norvegicus OX=10116 GN=Cfl1 PE=1 SV=3	0.00195535	0.00262059	0.00229484	0.00171901	0.00193216	0.0025668	0.532516	-0.14403	1260	0.693962
sp|Q9JLT0|MYH10_RAT	Myosin-10 OS=Rattus norvegicus OX=10116 GN=Myh10 PE=1 SV=1	9.58212e-05	0.000192632	8.89776e-05	0.000105026	0.000103292	0.000100628	0.532932	-0.288854	1261	0.693953
sp|Q6AY56|TBA8_RAT	Tubulin alpha-8 chain OS=Rattus norvegicus OX=10116 GN=Tuba8 PE=2 SV=1	0.000361456	0.000181661	0.000261054	0.000346656	0.000324699	0.00025306	0.535514	0.201037	1262	0.696763
sp|Q58FK9|KAT3_RAT	Kynurenine--oxoglutarate transaminase 3 OS=Rattus norvegicus OX=10116 GN=Kyat3 PE=2 SV=1	0.000178738	0.000299434	0.000129089	0.000228559	0.000321123	0.000187704	0.53606	0.280103	1263	0.696921
sp|Q4KLF8|ARPC5_RAT	Actin-related protein 2/3 complex subunit 5 OS=Rattus norvegicus OX=10116 GN=Arpc5 PE=1 SV=3	0.000895661	2.151e-06	0.000970308	0.000343595	2.13925e-06	0.000752475	0.535643	-0.766434	1264	0.695828
sp|Q4KM74|SC22B_RAT	Vesicle-trafficking protein SEC22b OS=Rattus norvegicus OX=10116 GN=Sec22b PE=1 SV=3	0.000377427	0.000505835	0.000408883	0.000361973	0.000542474	0.000528483	0.537518	0.149199	1265	0.697711
sp|Q53UA7|TAOK3_RAT	Serine/threonine-protein kinase TAO3 OS=Rattus norvegicus OX=10116 GN=Taok3 PE=1 SV=1	6.02427e-05	6.05538e-05	9.78952e-05	0.00014444	0.000194819	1.17e-06	0.531617	0.638458	1266	0.689507
sp|Q5XIG4|OCAD1_RAT	OCIA domain-containing protein 1 OS=Rattus norvegicus OX=10116 GN=Ociad1 PE=1 SV=1	1.33575e-06	0.000330226	0.000355911	1.44039e-06	0.000354146	1.17e-06	0.538061	-0.946365	1267	0.697314
sp|P06685|AT1A1_RAT	Sodium/potassium-transporting ATPase subunit alpha-1 OS=Rattus norvegicus OX=10116 GN=Atp1a1 PE=1 SV=1	1.33575e-06	7.97321e-05	8.59334e-05	1.44039e-06	8.55073e-05	1.17e-06	0.538137	-0.922356	1268	0.696862
sp|P17955|NUP62_RAT	Nuclear pore glycoprotein p62 OS=Rattus norvegicus OX=10116 GN=Nup62 PE=1 SV=1	1.33575e-06	5.17879e-05	5.58158e-05	1.44039e-06	5.5539e-05	1.17e-06	0.538193	-0.90569	1269	0.696386
sp|P81128|RHG35_RAT	Rho GTPase-activating protein 35 OS=Rattus norvegicus OX=10116 GN=Arhgap35 PE=1 SV=3	1.33575e-06	3.62757e-05	3.90971e-05	1.44039e-06	3.89032e-05	1.17e-06	0.538264	-0.885803	1270	0.695928
sp|Q9EST6|AN32B_RAT	Acidic leucine-rich nuclear phosphoprotein 32 family member B OS=Rattus norvegicus OX=10116 GN=Anp32b PE=1 SV=1	0.000198889	0.000199916	0.000107733	9.53729e-05	0.000107198	0.000208867	0.538936	-0.299995	1271	0.696249
sp|P31232|TAGL_RAT	Transgelin OS=Rattus norvegicus OX=10116 GN=Tagln PE=1 SV=2	0.000538288	0.000676334	1.44708e-06	0.000645309	0.000145065	0.00113058	0.540072	0.659601	1272	0.697168
sp|Q5SGE0|LPPRC_RAT	Leucine-rich PPR motif-containing protein, mitochondrial OS=Rattus norvegicus OX=10116 GN=Lrpprc PE=1 SV=1	0.000136022	7.81283e-05	8.42049e-05	9.31804e-05	2.13925e-06	0.000122439	0.54446	-0.454299	1273	0.702281
sp|Q9JK72|CCS_RAT	Copper chaperone for superoxide dismutase OS=Rattus norvegicus OX=10116 GN=Ccs PE=1 SV=1	0.000691032	0.000992286	0.000320839	0.000946767	0.000744912	0.000725699	0.54153	0.270448	1274	0.697953
sp|B5DFC8|EIF3C_RAT	Eukaryotic translation initiation factor 3 subunit C OS=Rattus norvegicus OX=10116 GN=Eif3c PE=1 SV=1	0.000207841	2.151e-06	1.44708e-06	1.44039e-06	6.40131e-05	1.17e-06	0.538178	-1.66614	1275	0.693089
sp|Q6P752|TOIP2_RAT	Torsin-1A-interacting protein 2 OS=Rattus norvegicus OX=10116 GN=Tor1aip2 PE=2 SV=1	0.00018719	0.000141118	0.000152093	8.97627e-05	2.13925e-06	0.000245726	0.547795	-0.508804	1276	0.704921
sp|P52844|ST1E1_RAT	Sulfotransferase 1E1 OS=Rattus norvegicus OX=10116 GN=Sult1e1 PE=1 SV=1	0.000366766	0.000552989	0.000893999	0.000615559	2.13925e-06	0.000674039	0.546682	-0.489666	1277	0.702937
sp|P81155|VDAC2_RAT	Voltage-dependent anion-selective channel protein 2 OS=Rattus norvegicus OX=10116 GN=Vdac2 PE=1 SV=2	0.000275074	0.00036866	1.44708e-06	1.44039e-06	0.000197681	0.000192583	0.544379	-0.719939	1278	0.699429
sp|Q5XIT9|MCCB_RAT	Methylcrotonoyl-CoA carboxylase beta chain, mitochondrial OS=Rattus norvegicus OX=10116 GN=Mccc2 PE=2 SV=1	0.000720665	0.000627802	0.000364339	0.000368617	0.000414323	0.00065591	0.547197	-0.251446	1279	0.7025
sp|P35213|1433B_RAT	14-3-3 protein beta/alpha OS=Rattus norvegicus OX=10116 GN=Ywhab PE=1 SV=3	0.000109955	0.000552615	0.000476476	0.000421812	2.13925e-06	0.000346414	0.549052	-0.564213	1280	0.704331
sp|P35704|PRDX2_RAT	Peroxiredoxin-2 OS=Rattus norvegicus OX=10116 GN=Prdx2 PE=1 SV=3	0.000546444	0.000686582	0.000443989	0.000655086	0.000883575	0.000430393	0.547968	0.231608	1281	0.702392
sp|P84586|RMXRL_RAT	RNA-binding motif protein, X chromosome retrogene-like OS=Rattus norvegicus OX=10116 GN=Rbmxrtl PE=1 SV=1	0.000836566	2.151e-06	0.000981812	1.44039e-06	2.13925e-06	0.000951745	0.547799	-0.930294	1282	0.701627
sp|P13221|AATC_RAT	Aspartate aminotransferase, cytoplasmic OS=Rattus norvegicus OX=10116 GN=Got1 PE=1 SV=3	0.000458457	0.000855817	0.00092238	0.00100499	0.000988406	0.000619016	0.549671	0.224043	1283	0.703476
sp|P49793|NUP98_RAT	Nuclear pore complex protein Nup98-Nup96 OS=Rattus norvegicus OX=10116 GN=Nup98 PE=1 SV=2	1.33575e-06	2.99434e-05	0.000112953	8.57095e-05	8.02808e-05	4.69261e-05	0.555176	0.561892	1284	0.709968
sp|P0C0S7|H2AZ_RAT	Histone H2A.Z OS=Rattus norvegicus OX=10116 GN=H2az1 PE=1 SV=2	0.00190188	0.00148688	0.00137359	0.00222934	0.00113898	0.000221921	0.551729	-0.407591	1285	0.705011
sp|Q9EPJ3|RT26_RAT	28S ribosomal protein S26, mitochondrial OS=Rattus norvegicus OX=10116 GN=Mrps26 PE=1 SV=1	1.33575e-06	0.000543773	0.000293033	1.44039e-06	2.13925e-06	0.000426089	0.554091	-0.963969	1286	0.707478
sp|P01026|CO3_RAT	Complement C3 OS=Rattus norvegicus OX=10116 GN=C3 PE=1 SV=3	0.000292773	0.000179841	0.000176207	0.00018719	0.0001578	0.000222055	0.556469	-0.194357	1287	0.709963
sp|P0DMW0|HS71A_RAT,sp|P0DMW1|HS71B_RAT	Heat shock 70 kDa protein 1A OS=Rattus norvegicus OX=10116 GN=Hspa1a PE=2 SV=1,Heat shock 70 kDa protein 1B OS=Rattus norvegicus OX=10116 GN=Hspa1b PE=2 SV=1	0.000590773	0.000466576	0.000411435	0.000526113	0.000363906	0.00044315	0.55762	-0.139761	1288	0.710879
sp|P43278|H10_RAT	Histone H1.0 OS=Rattus norvegicus OX=10116 GN=H1-0 PE=2 SV=2	0.000418283	0.000140148	1.44708e-06	0.000267437	2.13925e-06	1.17e-06	0.55857	-1.04817	1289	0.711538
sp|P02767|TTHY_RAT	Transthyretin OS=Rattus norvegicus OX=10116 GN=Ttr PE=1 SV=1	0.000920033	0.0012947	0.0013954	0.00158825	0.00198354	0.000772951	0.558972	0.26722	1290	0.711498
sp|P60192|SNAPN_RAT	SNARE-associated protein Snapin OS=Rattus norvegicus OX=10116 GN=Snapin PE=1 SV=1	0.000198889	0.000399833	0.000430931	0.000190746	0.000428794	0.000208867	0.559628	-0.313747	1291	0.711781
sp|Q6AYB3|ISY1_RAT	Pre-mRNA-splicing factor ISY1 homolog OS=Rattus norvegicus OX=10116 GN=Isy1 PE=2 SV=1	1.33575e-06	2.151e-06	0.000309542	1.44039e-06	0.000102669	1.17e-06	0.556356	-1.57207	1292	0.707071
sp|P62630|EF1A1_RAT	Elongation factor 1-alpha 1 OS=Rattus norvegicus OX=10116 GN=Eef1a1 PE=2 SV=1	0.00169788	0.0017655	0.00190281	0.00145991	0.0015147	0.002029	0.561282	-0.10093	1293	0.712781
sp|Q5XI73|GDIR1_RAT	Rho GDP-dissociation inhibitor 1 OS=Rattus norvegicus OX=10116 GN=Arhgdia PE=1 SV=1	0.000662965	0.000666388	0.000718218	0.00101731	0.000285863	0.00027849	0.561666	-0.372472	1294	0.712717
sp|Q920L2|SDHA_RAT	Succinate dehydrogenase [ubiquinone] flavoprotein subunit, mitochondrial OS=Rattus norvegicus OX=10116 GN=Sdha PE=1 SV=1	0.000742197	0.00095326	0.000536036	0.000909532	0.00071117	0.000866035	0.561784	0.156244	1295	0.712316
sp|P16290|PGAM2_RAT	Phosphoglycerate mutase 2 OS=Rattus norvegicus OX=10116 GN=Pgam2 PE=1 SV=2	1.33575e-06	2.151e-06	0.000115823	0.000102535	2.13925e-06	0.000112276	0.564023	0.862653	1296	0.714603
sp|P62856|RS26_RAT	40S ribosomal protein S26 OS=Rattus norvegicus OX=10116 GN=Rps26 PE=3 SV=3	1.33575e-06	2.151e-06	0.000509623	0.000451155	2.13925e-06	0.000494016	0.565085	0.884571	1297	0.715397
sp|P23965|ECI1_RAT	Enoyl-CoA delta isomerase 1, mitochondrial OS=Rattus norvegicus OX=10116 GN=Eci1 PE=1 SV=1	0.00074876	0.000470392	0.000506978	0.000538576	0.000403571	0.000589743	0.565488	-0.172228	1298	0.715355
sp|Q9JK11|RTN4_RAT	Reticulon-4 OS=Rattus norvegicus OX=10116 GN=Rtn4 PE=1 SV=1	1.33575e-06	2.151e-06	2.51963e-05	1.44039e-06	2.13925e-06	7.32741e-05	0.556853	1.42192	1299	0.70389
sp|P05371|CLUS_RAT	Clusterin OS=Rattus norvegicus OX=10116 GN=Clu PE=1 SV=2	0.00054461	0.000547422	0.000327777	0.000406242	0.000521843	0.000699027	0.570605	0.196616	1300	0.720718
sp|P97608|OPLA_RAT	5-oxoprolinase OS=Rattus norvegicus OX=10116 GN=Oplah PE=1 SV=2	0.000105004	2.151e-06	2.2751e-05	2.01409e-05	2.13925e-06	4.41086e-05	0.563795	-0.968456	1301	0.711569
sp|Q5PQT3|GLYAT_RAT	Glycine N-acyltransferase OS=Rattus norvegicus OX=10116 GN=Glyat PE=2 SV=1	0.000182763	2.151e-06	1.44708e-06	0.00052584	2.13925e-06	1.17e-06	0.56994	1.50557	1302	0.718772
sp|P62083|RS7_RAT	40S ribosomal protein S7 OS=Rattus norvegicus OX=10116 GN=Rps7 PE=1 SV=1	0.00111542	0.000840886	0.000604192	0.000802312	0.000751494	0.000732112	0.57272	-0.163651	1303	0.721724
sp|P05545|SPA3K_RAT	Serine protease inhibitor A3K OS=Rattus norvegicus OX=10116 GN=Serpina3k PE=1 SV=3	0.00104034	0.0013725	0.00126793	0.00112247	0.00126164	0.00109254	0.573127	-0.0823157	1304	0.721683
sp|P07150|ANXA1_RAT	Annexin A1 OS=Rattus norvegicus OX=10116 GN=Anxa1 PE=1 SV=2	0.000156352	0.00031432	1.44708e-06	1.44039e-06	2.13925e-06	0.000246294	0.57545	-0.917951	1305	0.724053
sp|P62919|RL8_RAT	60S ribosomal protein L8 OS=Rattus norvegicus OX=10116 GN=Rpl8 PE=2 SV=2	0.000631493	0.000634754	0.000912165	0.000807515	0.000453821	0.000663174	0.574288	-0.178787	1306	0.722038
sp|P02466|CO1A2_RAT	Collagen alpha-2(I) chain OS=Rattus norvegicus OX=10116 GN=Col1a2 PE=1 SV=3	0.000256295	0.000198168	0.000213581	0.000189077	0.000255026	0.000165632	0.575388	-0.131758	1307	0.722868
sp|P36860|RALB_RAT	Ras-related protein Ral-B OS=Rattus norvegicus OX=10116 GN=Ralb PE=2 SV=1	1.33575e-06	2.151e-06	0.000426747	0.000125929	0.000849262	1.17e-06	0.576655	1.18229	1308	0.723904
sp|Q9QZK8|DNS2A_RAT	Deoxyribonuclease-2-alpha OS=Rattus norvegicus OX=10116 GN=Dnase2 PE=2 SV=1	0.000154565	2.151e-06	1.44708e-06	0.000222355	8.33085e-05	1.17e-06	0.579186	0.956039	1309	0.726527
sp|P36972|APT_RAT	Adenine phosphoribosyltransferase OS=Rattus norvegicus OX=10116 GN=Aprt PE=1 SV=1	0.000450816	0.00075524	1.44708e-06	1.44039e-06	0.000647955	1.17e-06	0.578281	-0.892261	1310	0.724838
sp|D4AE41|RMXL1_RAT	RNA binding motif protein, X-linked-like-1 OS=Rattus norvegicus OX=10116 GN=Rbmxl1 PE=3 SV=1	0.000697138	2.151e-06	0.000906288	1.44039e-06	2.13925e-06	0.000878534	0.579197	-0.864055	1311	0.725433
sp|P26453|BASI_RAT	Basigin OS=Rattus norvegicus OX=10116 GN=Bsg PE=1 SV=2	0.000278855	0.000420443	0.000302096	0.000334297	0.000526046	0.000292845	0.580067	0.203617	1312	0.725968
sp|Q62658|FKB1A_RAT	Peptidyl-prolyl cis-trans isomerase FKBP1A OS=Rattus norvegicus OX=10116 GN=Fkbp1a PE=1 SV=3	0.00075136	0.000503493	0.00162796	0.000720595	0.00134991	0.00157811	0.581935	0.339868	1313	0.727751
sp|Q5I0D1|GLOD4_RAT	Glyoxalase domain-containing protein 4 OS=Rattus norvegicus OX=10116 GN=Glod4 PE=1 SV=1	0.000363073	0.000364948	9.83332e-05	0.000174104	0.000293537	0.000667254	0.584039	0.457724	1314	0.729827
sp|Q64232|TECR_RAT	Very-long-chain enoyl-CoA reductase OS=Rattus norvegicus OX=10116 GN=Tecr PE=1 SV=1	0.000263464	2.151e-06	0.000285422	0.000252676	0.000189338	0.000276681	0.586602	0.383231	1315	0.732472
sp|Q6IG12|K2C7_RAT	Keratin, type II cytoskeletal 7 OS=Rattus norvegicus OX=10116 GN=Krt7 PE=3 SV=1	0.000118376	0.000416456	6.4121e-05	0.000794704	6.3803e-05	0.000186472	0.585669	0.802959	1316	0.730751
sp|P47853|PGS1_RAT	Biglycan OS=Rattus norvegicus OX=10116 GN=Bgn PE=1 SV=1	0.00021991	0.000294728	7.94127e-05	0.000140604	0.000237057	0.000384904	0.586233	0.360274	1317	0.7309
sp|Q62740|SPP24_RAT	Secreted phosphoprotein 24 OS=Rattus norvegicus OX=10116 GN=Spp2 PE=1 SV=2	0.000266492	0.000401803	1.44708e-06	0.00012779	0.000287271	1.17e-06	0.588318	-0.686221	1318	0.732943
sp|Q4V898|RBMX_RAT	RNA-binding motif protein, X chromosome OS=Rattus norvegicus OX=10116 GN=Rbmx PE=1 SV=1	0.000693563	6.97145e-05	0.000751367	6.65165e-05	7.47641e-05	0.000801193	0.591023	-0.684455	1319	0.735754
sp|P83121|UP3_RAT	Urinary protein 3 OS=Rattus norvegicus OX=10116 PE=3 SV=1	1.33575e-06	0.00134597	1.44708e-06	0.000256846	0.000288693	1.17e-06	0.590217	-1.30278	1320	0.734194
sp|P68511|1433F_RAT	14-3-3 protein eta OS=Rattus norvegicus OX=10116 GN=Ywhah PE=1 SV=2	1.33575e-06	0.000331569	0.000357357	0.000316359	2.13925e-06	0.000115471	0.592049	-0.669551	1321	0.735916
sp|Q9Z254|GIPC1_RAT	PDZ domain-containing protein GIPC1 OS=Rattus norvegicus OX=10116 GN=Gipc1 PE=1 SV=2	8.12281e-05	8.16476e-05	0.000175996	0.000155804	8.75615e-05	1.17e-06	0.596357	-0.470692	1322	0.740709
sp|O35763|MOES_RAT	Moesin OS=Rattus norvegicus OX=10116 GN=Msn PE=1 SV=3	0.00032815	0.000471207	0.000507856	0.000449591	0.00040427	0.000344613	0.594118	-0.125296	1323	0.737371
sp|Q3MIE0|ECHD3_RAT	Enoyl-CoA hydratase domain-containing protein 3, mitochondrial OS=Rattus norvegicus OX=10116 GN=Echdc3 PE=2 SV=1	0.000721306	0.00108755	0.000976777	0.000864714	0.00058316	0.00104155	0.596619	-0.16219	1324	0.739916
sp|P55053|FABP5_RAT	Fatty acid-binding protein 5 OS=Rattus norvegicus OX=10116 GN=Fabp5 PE=1 SV=3	0.000801451	0.000604192	1.44708e-06	0.000768635	2.13925e-06	0.0014729	0.598373	0.673149	1325	0.741531
sp|P24049|RL17_RAT	60S ribosomal protein L17 OS=Rattus norvegicus OX=10116 GN=Rpl17 PE=2 SV=3	0.000882031	0.000886586	0.000637028	0.00112789	0.000633869	0.00092628	0.599753	0.160129	1326	0.74268
sp|P07756|CPSM_RAT	Carbamoyl-phosphate synthase [ammonia], mitochondrial OS=Rattus norvegicus OX=10116 GN=Cps1 PE=1 SV=1	0.00443603	0.00465832	0.00369222	0.00485969	0.00384885	0.00482901	0.601562	0.0823384	1327	0.744359
sp|A2VD12|PBIP1_RAT	Pre-B-cell leukemia transcription factor-interacting protein 1 OS=Rattus norvegicus OX=10116 GN=Pbxip1 PE=1 SV=1	0.000112392	0.00015063	1.44708e-06	7.18599e-05	0.00016154	0.00011803	0.604867	0.410142	1328	0.747885
sp|Q641Y0|OST48_RAT	Dolichyl-diphosphooligosaccharide--protein glycosyltransferase 48 kDa subunit OS=Rattus norvegicus OX=10116 GN=Ddost PE=2 SV=1	0.000245342	2.151e-06	0.000332237	0.000235296	0.000330589	0.000193238	0.60546	0.388953	1329	0.748055
sp|Q66HR2|MARE1_RAT	Microtubule-associated protein RP/EB family member 1 OS=Rattus norvegicus OX=10116 GN=Mapre1 PE=1 SV=3	1.33575e-06	0.00030435	1.44708e-06	1.44039e-06	0.000326395	0.000211985	0.606	0.813614	1330	0.748159
sp|P68101|IF2A_RAT	Eukaryotic translation initiation factor 2 subunit 1 OS=Rattus norvegicus OX=10116 GN=Eif2s1 PE=1 SV=2	0.000257609	0.000690505	9.30264e-05	0.000411769	0.000277695	0.000721421	0.607403	0.438435	1331	0.749328
sp|Q4FZY0|EFHD2_RAT	EF-hand domain-containing protein D2 OS=Rattus norvegicus OX=10116 GN=Efhd2 PE=1 SV=1	0.000565878	0.00045504	0.00110347	0.000434166	0.000732	0.000594266	0.607451	-0.271119	1332	0.748825
sp|Q68FY0|QCR1_RAT	Cytochrome b-c1 complex subunit 1, mitochondrial OS=Rattus norvegicus OX=10116 GN=Uqcrc1 PE=1 SV=1	0.00112704	0.000906288	0.000488388	0.000864714	0.00103268	0.000946864	0.607977	0.173646	1333	0.748911
sp|P02651|APOA4_RAT	Apolipoprotein A-IV OS=Rattus norvegicus OX=10116 GN=Apoa4 PE=1 SV=2	0.00207537	0.0017384	0.00157383	0.00165866	0.00201347	0.00203418	0.608466	0.0829136	1334	0.748951
sp|G3V7J5|EST2E_RAT,sp|O70631|EST2C_RAT,sp|Q8K3R0|EST2A_RAT	Pyrethroid hydrolase Ces2e OS=Rattus norvegicus OX=10116 GN=Ces2e PE=1 SV=2,Acylcarnitine hydrolase OS=Rattus norvegicus OX=10116 GN=Ces2c PE=1 SV=2,Pyrethroid hydrolase Ces2a OS=Rattus norvegicus OX=10116 GN=Ces2a PE=1 SV=1	9.54108e-05	4.79517e-05	1.44708e-06	4.57521e-05	5.1425e-05	0.000100197	0.614851	0.446777	1335	0.756243
sp|Q9JJP9|UBQL1_RAT	Ubiquilin-1 OS=Rattus norvegicus OX=10116 GN=Ubqln1 PE=1 SV=1	0.00120837	0.00121461	0.00156083	0.0011589	0.00175349	0.00141542	0.610583	0.119483	1336	0.750433
sp|O89049|TRXR1_RAT	Thioredoxin reductase 1, cytoplasmic OS=Rattus norvegicus OX=10116 GN=Txnrd1 PE=1 SV=5	1.33575e-06	0.000108973	0.000234896	0.000259934	0.000175298	5.69257e-05	0.6135	0.511671	1337	0.753453
sp|Q02974|KHK_RAT	Ketohexokinase OS=Rattus norvegicus OX=10116 GN=Khk PE=1 SV=1	0.000453842	0.000182474	1.44708e-06	0.000348207	2.13925e-06	1.17e-06	0.614578	-0.859429	1338	0.754213
sp|O35142|COPB2_RAT	Coatomer subunit beta' OS=Rattus norvegicus OX=10116 GN=Copb2 PE=1 SV=3	8.96651e-05	3.00427e-05	1.44708e-06	1.44039e-06	6.44375e-05	1.17e-06	0.618255	-0.853588	1339	0.758159
sp|P00173|CYB5_RAT	Cytochrome b5 OS=Rattus norvegicus OX=10116 GN=Cyb5a PE=1 SV=2	0.00181672	0.0022319	0.00218681	0.00212952	0.00195837	0.00190786	0.617134	-0.05655	1340	0.756219
sp|P50399|GDIB_RAT	Rab GDP dissociation inhibitor beta OS=Rattus norvegicus OX=10116 GN=Gdi2 PE=1 SV=2	1.33575e-06	0.000244392	0.0001317	0.000116591	2.13925e-06	0.000127667	0.617845	-0.615218	1341	0.756526
sp|Q9ERE6|MPRIP_RAT	Myosin phosphatase Rho-interacting protein OS=Rattus norvegicus OX=10116 GN=Mprip PE=1 SV=1	5.25733e-05	5.28448e-05	0.000170865	0.000151262	2.13925e-06	2.76054e-05	0.627916	-0.610104	1342	0.768285
sp|Q6AXT7|RBM42_RAT	RNA-binding protein 42 OS=Rattus norvegicus OX=10116 GN=Rbm42 PE=1 SV=2	1.33575e-06	5.688e-05	0.000122608	5.42708e-05	6.1e-05	1.17e-06	0.618609	-0.634988	1343	0.756334
sp|P32551|QCR2_RAT	Cytochrome b-c1 complex subunit 2, mitochondrial OS=Rattus norvegicus OX=10116 GN=Uqcrc2 PE=1 SV=2	0.0008378	0.000721822	0.000583473	0.000573925	0.000580579	0.000816985	0.626239	-0.12041	1344	0.765092
sp|P12785|FAS_RAT	Fatty acid synthase OS=Rattus norvegicus OX=10116 GN=Fasn PE=1 SV=3	0.00016197	0.000162806	0.000152073	0.000165694	0.000104759	0.000294832	0.62728	0.245446	1345	0.765795
sp|O35550|RABE1_RAT	Rab GTPase-binding effector protein 1 OS=Rattus norvegicus OX=10116 GN=Rabep1 PE=1 SV=1	1.33575e-06	0.000157707	1.44708e-06	1.44039e-06	6.76519e-05	1.17e-06	0.623323	-1.19166	1346	0.760399
sp|Q9Z2P6|SNP29_RAT	Synaptosomal-associated protein 29 OS=Rattus norvegicus OX=10116 GN=Snap29 PE=1 SV=1	0.000526244	0.000634754	0.000456083	0.000605636	0.000453821	0.000442116	0.63028	-0.106918	1347	0.768315
sp|Q6AYK6|CYBP_RAT	Calcyclin-binding protein OS=Rattus norvegicus OX=10116 GN=Cacybp PE=1 SV=1	0.000472471	0.000474911	1.44708e-06	0.000113281	2.13925e-06	0.000496174	0.632059	-0.633573	1348	0.769912
sp|Q6PCU8|NDUV3_RAT	NADH dehydrogenase [ubiquinone] flavoprotein 3, mitochondrial OS=Rattus norvegicus OX=10116 GN=Ndufv3 PE=3 SV=1	0.00150272	0.00100699	0.00135663	0.00120099	0.00134991	0.00105207	0.633499	-0.101782	1349	0.771093
sp|Q64380|SARDH_RAT	Sarcosine dehydrogenase, mitochondrial OS=Rattus norvegicus OX=10116 GN=Sardh PE=1 SV=2	0.000264897	0.00041419	0.000127544	0.000225823	6.34559e-05	0.000340006	0.635103	-0.358198	1350	0.772474
sp|P12938|CP2D3_RAT	Cytochrome P450 2D3 OS=Rattus norvegicus OX=10116 GN=Cyp2d3 PE=2 SV=2	0.000162294	2.151e-06	1.44708e-06	0.000155649	0.000116632	1.17e-06	0.639229	0.721037	1351	0.776916
sp|Q9JKL7|SREK1_RAT	Splicing regulatory glutamine/lysine-rich protein 1 OS=Rattus norvegicus OX=10116 GN=Srek1 PE=1 SV=1	0.00010951	0.000110075	1.44708e-06	0.000210052	0.000118049	1.17e-06	0.635353	0.575015	1352	0.771635
sp|P14882|PCCA_RAT	Propionyl-CoA carboxylase alpha chain, mitochondrial OS=Rattus norvegicus OX=10116 GN=Pcca PE=1 SV=3	7.34029e-05	0.000147564	0.000119281	0.000140795	0.000118689	0.000115628	0.640169	0.140736	1353	0.776909
sp|Q5BJT4|TXD15_RAT	Thioredoxin domain-containing protein 15 OS=Rattus norvegicus OX=10116 GN=Txndc15 PE=2 SV=1	0.00015772	7.92672e-05	0.000170865	0.000151262	2.13925e-06	0.000165632	0.64531	-0.354337	1354	0.78257
sp|P09005|SPI21_RAT	Serine protease inhibitor 2.1 (Fragment) OS=Rattus norvegicus OX=10116 PE=2 SV=1	0.000884779	0.000762298	0.000547725	0.000484886	0.000953766	0.0010619	0.641431	0.188158	1355	0.777292
sp|P24268|CATD_RAT	Cathepsin D OS=Rattus norvegicus OX=10116 GN=Ctsd PE=1 SV=1	0.000465216	2.151e-06	1.44708e-06	1.44039e-06	2.13925e-06	0.00020938	0.640846	-1.13843	1356	0.77601
sp|Q8R5M4|OPTN_RAT	Optineurin OS=Rattus norvegicus OX=10116 GN=Optn PE=1 SV=3	0.000138713	4.64763e-05	0.000150273	0.000266066	0.000199371	1.17e-06	0.638217	0.476056	1357	0.772256
sp|P68370|TBA1A_RAT	Tubulin alpha-1A chain OS=Rattus norvegicus OX=10116 GN=Tuba1a PE=1 SV=1	0.000779682	0.000723423	1.44708e-06	0.00109288	2.13925e-06	0.00107073	0.641693	0.525532	1358	0.77589
sp|P84850|D2HDH_RAT	D-2-hydroxyglutarate dehydrogenase, mitochondrial OS=Rattus norvegicus OX=10116 GN=D2hgdh PE=3 SV=1	0.000252794	0.00015246	1.44708e-06	0.000193955	0.000163503	0.000159286	0.645505	0.345479	1359	0.779926
sp|A0A0G2K2P5|ZO1_RAT	Tight junction protein ZO-1 OS=Rattus norvegicus OX=10116 GN=Tjp1 PE=1 SV=1	0.000352479	0.0003543	0.000431663	0.000367442	0.000313882	0.00040235	0.644509	-0.0711297	1360	0.77815
sp|Q9WV25|PUF60_RAT	Poly(U)-binding-splicing factor PUF60 OS=Rattus norvegicus OX=10116 GN=Puf60 PE=2 SV=2	9.59183e-05	9.64136e-05	1.44708e-06	9.19909e-05	0.000103397	5.03651e-05	0.65062	0.342797	1361	0.78495
sp|Q05962|ADT1_RAT	ADP/ATP translocase 1 OS=Rattus norvegicus OX=10116 GN=Slc25a4 PE=1 SV=3	9.07683e-05	9.12371e-05	1.44708e-06	0.000174104	2.13925e-06	9.53219e-05	0.639084	0.56589	1362	0.770466
sp|O88339|EPN1_RAT	Epsin-1 OS=Rattus norvegicus OX=10116 GN=Epn1 PE=1 SV=1	0.000188167	0.000236423	0.000407698	0.000360924	0.000507095	0.000148205	0.646046	0.288065	1363	0.778288
sp|Q63413|DX39B_RAT	Spliceosome RNA helicase Ddx39b OS=Rattus norvegicus OX=10116 GN=Ddx39b PE=2 SV=3	0.000126397	2.151e-06	0.000205397	1.44039e-06	2.13925e-06	0.000199107	0.646816	-0.720359	1364	0.778645
sp|P43244|MATR3_RAT	Matrin-3 OS=Rattus norvegicus OX=10116 GN=Matr3 PE=1 SV=2	0.000768255	0.000740046	0.000693569	0.000767498	0.000621117	0.000739563	0.64815	-0.0491108	1365	0.779679
sp|Q6PDU1|SRSF2_RAT	Serine/arginine-rich splicing factor 2 OS=Rattus norvegicus OX=10116 GN=Srsf2 PE=1 SV=3	0.000489574	0.000615128	0.000397782	0.00058691	0.00039581	0.000385601	0.648346	-0.134943	1366	0.779344
sp|D4A7N1|MIC25_RAT	MICOS complex subunit Mic25 OS=Rattus norvegicus OX=10116 GN=Chchd6 PE=1 SV=1	1.33575e-06	0.000208342	0.000112273	0.000198785	0.000111716	0.000108835	0.651923	0.381266	1367	0.783071
sp|Q63716|PRDX1_RAT	Peroxiredoxin-1 OS=Rattus norvegicus OX=10116 GN=Prdx1 PE=1 SV=1	0.00271849	0.00286915	0.00220879	0.00273754	0.00117218	0.00299761	0.649406	-0.174686	1368	0.779477
sp|P24051|RS27L_RAT	40S ribosomal protein S27-like OS=Rattus norvegicus OX=10116 GN=Rps27l PE=1 SV=3	0.000966034	0.000647349	0.000697698	0.00154413	2.13925e-06	1.17e-06	0.652287	-0.578683	1369	0.782363
sp|Q9EQX9|UBE2N_RAT	Ubiquitin-conjugating enzyme E2 N OS=Rattus norvegicus OX=10116 GN=Ube2n PE=1 SV=1	0.000711815	0.000357745	1.44708e-06	0.000512002	2.13925e-06	0.000186881	0.652065	-0.611436	1370	0.781526
sp|P70473|AMACR_RAT	Alpha-methylacyl-CoA racemase OS=Rattus norvegicus OX=10116 GN=Amacr PE=1 SV=3	0.000424853	0.000498221	0.000767102	0.000543276	0.000839628	0.000520528	0.652348	0.171429	1371	0.781295
sp|Q9QYK3|NRBF2_RAT	Nuclear receptor-binding factor 2 OS=Rattus norvegicus OX=10116 GN=Nrbf2 PE=1 SV=1	1.33575e-06	9.47339e-05	1.44708e-06	1.44039e-06	0.000203192	1.17e-06	0.651839	1.07753	1372	0.780117
sp|P82450|SIAE_RAT	Sialate O-acetylesterase OS=Rattus norvegicus OX=10116 GN=Siae PE=1 SV=2	0.000399247	0.000351145	0.000540651	0.000430762	0.000753158	0.000314457	0.654177	0.214863	1373	0.782344
sp|Q71UF4|RBBP7_RAT	Histone-binding protein RBBP7 OS=Rattus norvegicus OX=10116 GN=Rbbp7 PE=2 SV=1	6.36446e-05	0.000127947	1.44708e-06	6.10386e-05	6.8607e-05	1.17e-06	0.64952	-0.561351	1374	0.776209
sp|Q63799|TCEA2_RAT	Transcription elongation factor A protein 2 OS=Rattus norvegicus OX=10116 GN=Tcea2 PE=2 SV=1	9.04648e-05	2.151e-06	0.000196009	1.44039e-06	9.75183e-05	9.50031e-05	0.649511	-0.573421	1375	0.775634
sp|Q8K3M6|ERC2_RAT	ERC protein 2 OS=Rattus norvegicus OX=10116 GN=Erc2 PE=1 SV=1	0.000113057	0.000113641	9.18599e-05	0.000135535	6.09362e-05	8.90468e-05	0.655705	-0.157975	1376	0.782462
sp|Q63515|C4BPB_RAT	C4b-binding protein beta chain OS=Rattus norvegicus OX=10116 GN=C4bpb PE=2 SV=1	0.000104841	2.151e-06	1.44708e-06	1.44039e-06	2.13925e-06	0.000220201	0.657857	1.0452	1377	0.78446
sp|Q6P9V9|TBA1B_RAT	Tubulin alpha-1B chain OS=Rattus norvegicus OX=10116 GN=Tuba1b PE=1 SV=1	0.000839657	0.000783708	1.44708e-06	0.0011504	2.13925e-06	0.00113372	0.661102	0.492712	1378	0.787757
sp|E9PTG8|STK10_RAT	Serine/threonine-protein kinase 10 OS=Rattus norvegicus OX=10116 GN=Stk10 PE=1 SV=1	1.33575e-06	2.81165e-05	1.44708e-06	1.44039e-06	2.13925e-06	5.87506e-05	0.643636	1.01236	1379	0.766389
sp|O88761|PSMD1_RAT	26S proteasome non-ATPase regulatory subunit 1 OS=Rattus norvegicus OX=10116 GN=Psmd1 PE=1 SV=1	2.8383e-05	8.55886e-05	9.22454e-05	0.000136104	2.13925e-06	1.17e-06	0.674224	-0.564795	1380	0.802229
sp|Q5I0E7|TMED9_RAT	Transmembrane emp24 domain-containing protein 9 OS=Rattus norvegicus OX=10116 GN=Tmed9 PE=1 SV=1	0.000230204	0.000347089	0.000374085	0.000220778	0.000496306	0.000362629	0.662713	0.182558	1381	0.787961
sp|Q5U312|RAI14_RAT	Ankycorbin OS=Rattus norvegicus OX=10116 GN=Rai14 PE=1 SV=2	5.53149e-05	5.56005e-05	5.9925e-05	1.44039e-06	2.13925e-06	0.00011618	0.678539	-0.51251	1382	0.806195
sp|Q62698|DC1L2_RAT	Cytoplasmic dynein 1 light intermediate chain 2 OS=Rattus norvegicus OX=10116 GN=Dync1li2 PE=1 SV=1	5.44245e-05	5.47055e-05	5.89604e-05	1.44039e-06	2.13925e-06	0.00011431	0.678803	-0.511805	1383	0.805926
sp|Q5HZY0|UBXN4_RAT	UBX domain-containing protein 4 OS=Rattus norvegicus OX=10116 GN=Ubxn4 PE=1 SV=1	0.000213826	2.151e-06	0.000115823	1.44039e-06	0.000115249	0.000112276	0.657621	-0.535183	1384	0.780212
sp|O70127|ABCBB_RAT	Bile salt export pump OS=Rattus norvegicus OX=10116 GN=Abcb11 PE=1 SV=1	4.09523e-05	2.151e-06	1.44708e-06	1.96377e-05	2.13925e-06	1.17e-06	0.642518	-0.957133	1385	0.761743
sp|Q00715|H2B1_RAT	Histone H2B type 1 OS=Rattus norvegicus OX=10116 PE=1 SV=2	0.00173113	0.00152256	0.00117213	0.00124519	0.000933055	0.00181798	0.664336	-0.147311	1386	0.787042
sp|P04764|ENOA_RAT	Alpha-enolase OS=Rattus norvegicus OX=10116 GN=Eno1 PE=1 SV=4	0.00249299	0.00231793	0.00202557	0.00251046	0.00161242	0.0022908	0.665747	-0.0921027	1387	0.788144
sp|Q4FZV0|MANBA_RAT	Beta-mannosidase OS=Rattus norvegicus OX=10116 GN=Manba PE=2 SV=1	9.21077e-05	0.000123444	0.000299353	0.000235563	9.92894e-05	6.44857e-05	0.666601	-0.366694	1388	0.788587
sp|P11442|CLH1_RAT	Clathrin heavy chain 1 OS=Rattus norvegicus OX=10116 GN=Cltc PE=1 SV=3	1.33575e-06	2.151e-06	3.4989e-05	1.44039e-06	2.13925e-06	1.69588e-05	0.649339	-0.905626	1389	0.767614
sp|Q811S9|GNL3_RAT	Guanine nucleotide-binding protein-like 3 OS=Rattus norvegicus OX=10116 GN=Gnl3 PE=1 SV=1	1.33575e-06	2.151e-06	0.000108934	1.44039e-06	2.13925e-06	5.27991e-05	0.661469	-0.995687	1390	0.78139
sp|Q3B7U9|FKBP8_RAT	Peptidyl-prolyl cis-trans isomerase FKBP8 OS=Rattus norvegicus OX=10116 GN=Fkbp8 PE=2 SV=1	0.000335595	0.000269862	0.000218139	0.000386225	0.000144705	0.000422917	0.66704	0.21182	1391	0.787405
sp|P10719|ATPB_RAT	ATP synthase subunit beta, mitochondrial OS=Rattus norvegicus OX=10116 GN=Atp5f1b PE=1 SV=2	0.00378379	0.00318657	0.00227114	0.00338366	0.00330714	0.00316815	0.667323	0.0933075	1392	0.787173
sp|Q811U3|RB6I2_RAT	ELKS/Rab6-interacting/CAST family member 1 OS=Rattus norvegicus OX=10116 GN=Erc1 PE=1 SV=1	0.000171196	0.00025812	0.000154553	0.000246279	0.000123029	0.000299641	0.668004	0.196252	1393	0.787411
sp|Q62696|DLG1_RAT	Disks large homolog 1 OS=Rattus norvegicus OX=10116 GN=Dlg1 PE=1 SV=1	2.96915e-05	2.98448e-05	1.44708e-06	0.000113903	2.13925e-06	1.17e-06	0.652586	0.942635	1394	0.768685
sp|P0CG51|UBB_RAT,sp|P62986|RL40_RAT,sp|Q63429|UBC_RAT	Polyubiquitin-B OS=Rattus norvegicus OX=10116 GN=Ubb PE=1 SV=1,Ubiquitin-60S ribosomal protein L40 OS=Rattus norvegicus OX=10116 GN=Uba52 PE=1 SV=2,Polyubiquitin-C OS=Rattus norvegicus OX=10116 GN=Ubc PE=1 SV=1	0.000620796	0.000713145	0.000768611	0.000935592	0.0007648	1.17e-06	0.669321	-0.305282	1395	0.787832
sp|O35331|PDXK_RAT	Pyridoxal kinase OS=Rattus norvegicus OX=10116 GN=Pdxk PE=1 SV=1	0.000606868	0.000958574	0.00122097	0.000498874	0.00112146	0.000819402	0.671434	-0.191684	1396	0.789752
sp|Q920G2|NHRF2_RAT	Na(+)/H(+) exchange regulatory cofactor NHE-RF2 OS=Rattus norvegicus OX=10116 GN=Slc9a3r2 PE=1 SV=1	0.000240792	0.000322714	0.000434767	0.00030791	0.000605655	0.000252872	0.672619	0.224603	1397	0.79058
sp|P80386|AAKB1_RAT	5'-AMP-activated protein kinase subunit beta-1 OS=Rattus norvegicus OX=10116 GN=Prkab1 PE=1 SV=4	0.000100181	0.000201397	1.44708e-06	1.44039e-06	0.000215985	0.000210414	0.671913	0.49763	1398	0.789185
sp|O55004|RNAS4_RAT	Ribonuclease 4 OS=Rattus norvegicus OX=10116 GN=Rnase4 PE=1 SV=1	0.00055202	0.000739827	0.000797369	0.000529417	0.000793414	0.000966188	0.674037	0.131769	1399	0.791115
sp|P06399|FIBA_RAT	Fibrinogen alpha chain OS=Rattus norvegicus OX=10116 GN=Fga PE=1 SV=3	0.000933916	0.00104304	0.000974279	0.00072981	0.00111859	0.000944443	0.67483	-0.0795839	1400	0.791479
sp|O35509|RB11B_RAT	Ras-related protein Rab-11B OS=Rattus norvegicus OX=10116 GN=Rab11b PE=1 SV=4	0.000744467	0.0013719	0.00201628	0.00178496	0.00173878	0.00117272	0.67527	0.184506	1401	0.79143
sp|Q05982|NDKA_RAT	Nucleoside diphosphate kinase A OS=Rattus norvegicus OX=10116 GN=Nme1 PE=1 SV=1	0.000533861	0.000357745	0.00038557	0.000170667	0.00153463	0.000186881	0.675832	0.567091	1402	0.791523
sp|P70619|GSHR_RAT	Glutathione reductase (Fragment) OS=Rattus norvegicus OX=10116 GN=Gsr PE=2 SV=2	0.000255179	0.000384745	0.000276446	0.000183548	0.000550151	0.000334976	0.678272	0.22182	1403	0.793815
sp|P10868|GAMT_RAT	Guanidinoacetate N-methyltransferase OS=Rattus norvegicus OX=10116 GN=Gamt PE=1 SV=2	0.000573071	0.000230412	0.000620833	0.000219843	0.000617754	0.000361092	0.67995	-0.248812	1404	0.795212
sp|P21533|RL6_RAT	60S ribosomal protein L6 OS=Rattus norvegicus OX=10116 GN=Rpl6 PE=1 SV=5	0.000816915	0.000821133	0.000589999	0.000783466	0.000782765	0.000762575	0.683915	0.0638102	1405	0.79928
sp|Q68FR9|EF1D_RAT	Elongation factor 1-delta OS=Rattus norvegicus OX=10116 GN=Eef1d PE=1 SV=2	0.00163641	0.00193513	0.00135567	0.00230796	0.000933886	0.00232504	0.686098	0.176096	1406	0.80126
sp|P18418|CALR_RAT	Calreticulin OS=Rattus norvegicus OX=10116 GN=Calr PE=1 SV=1	0.00338112	0.00307179	0.00211322	0.0027438	0.00336438	0.00300447	0.688177	0.0892283	1407	0.803117
sp|O88618|FTCD_RAT	Formimidoyltransferase-cyclodeaminase OS=Rattus norvegicus OX=10116 GN=Ftcd PE=1 SV=4	0.000599977	0.000552819	0.000595816	0.000575411	0.000485068	0.000630076	0.68859	-0.0487132	1408	0.803029
sp|P85971|6PGL_RAT	6-phosphogluconolactonase OS=Rattus norvegicus OX=10116 GN=Pgls PE=1 SV=1	0.00126299	0.00105792	0.00102619	0.00121127	0.00113455	0.00110529	0.68944	0.0441521	1409	0.80345
sp|P61107|RAB14_RAT	Ras-related protein Rab-14 OS=Rattus norvegicus OX=10116 GN=Rab14 PE=1 SV=3	1.33575e-06	2.151e-06	0.000408883	0.000361973	0.000271237	1.17e-06	0.691946	0.621409	1410	0.805798
sp|P13471|RS14_RAT	40S ribosomal protein S14 OS=Rattus norvegicus OX=10116 GN=Rps14 PE=2 SV=3	0.000895661	0.00144046	0.000970308	0.00154618	2.13925e-06	0.00112871	0.691543	-0.30464	1411	0.804758
sp|P08082|CLCB_RAT	Clathrin light chain B OS=Rattus norvegicus OX=10116 GN=Cltb PE=1 SV=1	0.000472471	0.000831094	0.000895734	0.000679688	0.000891292	0.00037213	0.691539	-0.178676	1412	0.804183
sp|Q63556|SPA3M_RAT	Serine protease inhibitor A3M (Fragment) OS=Rattus norvegicus OX=10116 GN=Serpina3m PE=2 SV=1	6.56528e-05	6.59918e-05	0.000142249	6.29646e-05	0.000212315	6.89464e-05	0.692193	0.329742	1413	0.804375
sp|P16975|SPRC_RAT	SPARC OS=Rattus norvegicus OX=10116 GN=Sparc PE=1 SV=4	0.000269591	9.03277e-05	9.73532e-05	8.61841e-05	9.68704e-05	0.000188744	0.692755	-0.298532	1414	0.804458
sp|Q9JMB5|ADRM1_RAT	Proteasomal ubiquitin receptor ADRM1 OS=Rattus norvegicus OX=10116 GN=Adrm1 PE=1 SV=2	1.33575e-06	6.68026e-05	1.44708e-06	0.000127476	2.13925e-06	1.17e-06	0.688303	0.910347	1415	0.798724
sp|Q8K586|RANT_RAT	GTP-binding nuclear protein Ran, testis-specific isoform OS=Rattus norvegicus OX=10116 GN=Rasl2-9 PE=2 SV=1	1.33575e-06	0.000125873	1.44708e-06	0.000240198	2.13925e-06	1.17e-06	0.691465	0.920446	1416	0.801826
sp|Q9JHZ4|GRAP1_RAT	GRIP1-associated protein 1 OS=Rattus norvegicus OX=10116 GN=Gripap1 PE=1 SV=1	0.000193899	0.000194901	0.000245069	0.00018596	0.00027869	0.000101813	0.697664	-0.162202	1417	0.808444
sp|D4AE41|RMXL1_RAT,sp|P84586|RMXRL_RAT	RNA binding motif protein, X-linked-like-1 OS=Rattus norvegicus OX=10116 GN=Rbmxl1 PE=3 SV=1,RNA-binding motif protein, X chromosome retrogene-like OS=Rattus norvegicus OX=10116 GN=Rbmxrtl PE=1 SV=1	1.33575e-06	0.000840886	1.44708e-06	0.000468015	0.000826644	1.17e-06	0.703099	0.619127	1418	0.814167
sp|P62632|EF1A2_RAT	Elongation factor 1-alpha 2 OS=Rattus norvegicus OX=10116 GN=Eef1a2 PE=1 SV=1	0.00052579	2.151e-06	0.000443031	0.000392203	0.000251905	0.000552167	0.704387	0.301049	1419	0.815084
sp|P27653|C1TC_RAT	C-1-tetrahydrofolate synthase, cytoplasmic OS=Rattus norvegicus OX=10116 GN=Mthfd1 PE=1 SV=3	0.000520729	0.00046526	0.000501447	0.000554897	0.00043659	0.000546852	0.703479	0.0485462	1420	0.81346
sp|P27008|PARP1_RAT	Poly [ADP-ribose] polymerase 1 OS=Rattus norvegicus OX=10116 GN=Parp1 PE=1 SV=4	0.000106702	2.151e-06	1.44708e-06	7.67498e-05	2.13925e-06	8.40412e-05	0.708466	0.56282	1421	0.81865
sp|P08661|MBL2_RAT	Mannose-binding protein C OS=Rattus norvegicus OX=10116 GN=Mbl2 PE=1 SV=2	0.000443426	0.000334287	0.000600478	0.000531587	0.000239	0.000465671	0.707939	-0.156795	1422	0.817466
sp|P80254|DOPD_RAT	D-dopachrome decarboxylase OS=Rattus norvegicus OX=10116 GN=Ddt PE=1 SV=3	0.00343843	0.00253453	0.00322833	0.0030778	0.00222391	0.0033702	0.708346	-0.0854874	1423	0.81736
sp|Q4QRB4|TBB3_RAT	Tubulin beta-3 chain OS=Rattus norvegicus OX=10116 GN=Tubb3 PE=1 SV=1	0.00132239	0.00120838	0.000976777	0.0010953	0.00123111	0.00132561	0.712469	0.0582329	1424	0.821541
sp|P83732|RL24_RAT	60S ribosomal protein L24 OS=Rattus norvegicus OX=10116 GN=Rpl24 PE=2 SV=1	0.000344573	0.000519528	0.000186645	0.000495696	0.00018572	0.000542789	0.715238	0.22043	1425	0.824155
sp|P10760|SAHH_RAT	Adenosylhomocysteinase OS=Rattus norvegicus OX=10116 GN=Ahcy PE=1 SV=3	0.00056352	0.00037762	0.00040699	0.000600496	0.000202486	0.000394527	0.71611	-0.170924	1426	0.824581
sp|Q62871|DC1I2_RAT	Cytoplasmic dynein 1 intermediate chain 2 OS=Rattus norvegicus OX=10116 GN=Dync1i2 PE=1 SV=1	1.33575e-06	8.52308e-05	0.00013779	0.000121982	2.13925e-06	0.000178094	0.711583	0.42978	1427	0.818794
sp|Q6AYH5|DCTN2_RAT	Dynactin subunit 2 OS=Rattus norvegicus OX=10116 GN=Dctn2 PE=1 SV=1	0.000740146	0.000811601	0.000656044	0.000838902	0.000580258	0.0009186	0.717596	0.0825232	1428	0.825135
sp|Q99MC0|PP14A_RAT	Protein phosphatase 1 regulatory subunit 14A OS=Rattus norvegicus OX=10116 GN=Ppp1r14a PE=1 SV=1	0.00128805	0.00166461	0.00159474	0.00176472	0.00119012	0.00135266	0.718234	-0.0781866	1429	0.825291
sp|Q5XI81|FXR1_RAT	Fragile X mental retardation syndrome-related protein 1 OS=Rattus norvegicus OX=10116 GN=Fxr1 PE=1 SV=1	0.000238107	2.151e-06	1.44708e-06	1.44039e-06	0.000154003	0.000200042	0.721212	0.556543	1430	0.828133
sp|P08934|KNG1_RAT	Kininogen-1 OS=Rattus norvegicus OX=10116 GN=Kng1 PE=2 SV=1	0.000169321	0.000212744	1.44708e-06	0.000162388	4.56306e-05	8.89075e-05	0.712322	-0.369167	1431	0.817353
sp|P09034|ASSY_RAT	Argininosuccinate synthase OS=Rattus norvegicus OX=10116 GN=Ass1 PE=1 SV=1	0.00131306	0.000857894	0.000924619	0.00138522	0.00113235	0.000827357	0.718519	0.11177	1432	0.823888
sp|Q03555|GEPH_RAT	Gephyrin OS=Rattus norvegicus OX=10116 GN=Gphn PE=1 SV=3	0.00024654	0.000177009	0.000152621	0.000270223	0.000113898	0.000258908	0.718795	0.158389	1433	0.82363
sp|P38918|ARK73_RAT	Aflatoxin B1 aldehyde reductase member 3 OS=Rattus norvegicus OX=10116 GN=Akr7a3 PE=1 SV=2	1.33575e-06	2.151e-06	8.96125e-05	0.000158663	2.13925e-06	1.17e-06	0.721352	0.798906	1434	0.825983
sp|P07871|THIKB_RAT	3-ketoacyl-CoA thiolase B, peroxisomal OS=Rattus norvegicus OX=10116 GN=Acaa1b PE=1 SV=2	6.37947e-05	0.00307796	6.91116e-05	0.00171311	0.000137538	6.69951e-05	0.724223	-0.743626	1435	0.828693
sp|Q63186|EI2BD_RAT	Translation initiation factor eIF-2B subunit delta OS=Rattus norvegicus OX=10116 GN=Eif2b4 PE=2 SV=1	0.000206481	2.151e-06	5.59223e-05	0.000198026	2.13925e-06	0.000162629	0.722297	0.455592	1436	0.825914
sp|Q5FWT1|FA98A_RAT	Protein FAM98A OS=Rattus norvegicus OX=10116 GN=Fam98a PE=2 SV=1	1.33575e-06	2.151e-06	0.000398297	1.44039e-06	0.00022647	1.17e-06	0.72414	-0.810568	1437	0.827444
sp|P11980|KPYM_RAT	Pyruvate kinase PKM OS=Rattus norvegicus OX=10116 GN=Pkm PE=1 SV=3	0.000101879	2.151e-06	1.44708e-06	9.77078e-05	2.13925e-06	5.34952e-05	0.731232	0.539821	1438	0.834967
sp|P11497|ACACA_RAT	Acetyl-CoA carboxylase 1 OS=Rattus norvegicus OX=10116 GN=Acaca PE=1 SV=1	1.33575e-06	5.79715e-05	1.44708e-06	3.31873e-05	2.13925e-06	1.17e-06	0.727062	-0.735227	1439	0.829629
sp|P61023|CHP1_RAT	Calcineurin B homologous protein 1 OS=Rattus norvegicus OX=10116 GN=Chp1 PE=1 SV=2	0.000554851	0.000557716	0.00045082	0.000266066	0.000747641	0.000728357	0.730644	0.156123	1440	0.833137
sp|Q05175|BASP1_RAT	Brain acid soluble protein 1 OS=Rattus norvegicus OX=10116 GN=Basp1 PE=1 SV=2	1.33575e-06	0.000370754	1.44708e-06	1.44039e-06	2.13925e-06	0.000645589	0.729205	0.797343	1441	0.83092
sp|B4F777|HMGN5_RAT	High mobility group nucleosome-binding domain-containing protein 5 OS=Rattus norvegicus OX=10116 GN=Hmgn5 PE=2 SV=1	0.000630512	0.000507014	0.000683061	0.000483756	0.000883575	0.000595929	0.733012	0.108848	1442	0.834678
sp|Q6IUR5|NENF_RAT	Neudesin OS=Rattus norvegicus OX=10116 GN=Nenf PE=1 SV=1	0.000316362	0.000476994	0.00102819	0.000910225	0.000682058	0.00049835	0.734138	0.19878	1443	0.835381
sp|P06759|APOC3_RAT	Apolipoprotein C-III OS=Rattus norvegicus OX=10116 GN=Apoc3 PE=2 SV=2	1.33575e-06	0.000538389	0.000290132	1.44039e-06	2.13925e-06	0.000562494	0.735699	-0.551873	1444	0.836578
sp|Q9EQV6|TPP1_RAT	Tripeptidyl-peptidase 1 OS=Rattus norvegicus OX=10116 GN=Tpp1 PE=1 SV=1	1.33575e-06	9.65849e-05	5.20485e-05	1.44039e-06	2.13925e-06	0.000100909	0.742195	-0.521317	1445	0.84338
sp|P06761|BIP_RAT	Endoplasmic reticulum chaperone BiP OS=Rattus norvegicus OX=10116 GN=Hspa5 PE=1 SV=1	0.00529399	0.00565391	0.00470466	0.0045219	0.00548384	0.0052121	0.734323	-0.0406345	1446	0.833858
sp|Q5XIB1|TSSC4_RAT	Protein TSSC4 OS=Rattus norvegicus OX=10116 GN=Tssc4 PE=2 SV=1	1.33575e-06	2.151e-06	0.000184879	1.44039e-06	0.000183962	8.96086e-05	0.738346	0.545954	1447	0.837847
sp|Q63347|PRS7_RAT	26S proteasome regulatory subunit 7 OS=Rattus norvegicus OX=10116 GN=Psmc2 PE=1 SV=3	0.000624687	0.000502331	0.000541401	0.000718931	0.000673394	0.000393616	0.734963	0.0982034	1448	0.833431
sp|Q02874|H2AY_RAT	Core histone macro-H2A.1 OS=Rattus norvegicus OX=10116 GN=Macroh2a1 PE=1 SV=4	0.000145817	2.151e-06	0.000157969	0.000209769	2.13925e-06	1.17e-06	0.735752	-0.521851	1449	0.833751
sp|P61354|RL27_RAT	60S ribosomal protein L27 OS=Rattus norvegicus OX=10116 GN=Rpl27 PE=2 SV=2	0.000397779	2.151e-06	0.000430931	0.000572237	2.13925e-06	1.17e-06	0.735381	-0.529674	1450	0.832756
sp|Q923V8|SEP15_RAT	Selenoprotein F OS=Rattus norvegicus OX=10116 GN=Selenof PE=1 SV=3	0.000834845	0.000503493	0.000361769	0.000480397	0.000539963	0.000526036	0.735284	-0.136717	1451	0.832072
sp|Q63042|ALR_RAT	FAD-linked sulfhydryl oxidase ALR OS=Rattus norvegicus OX=10116 GN=Gfer PE=1 SV=2	0.000409833	2.151e-06	0.000887979	0.000131017	0.000441788	0.000430393	0.737668	-0.373864	1452	0.834195
sp|P63029|TCTP_RAT	Translationally-controlled tumor protein OS=Rattus norvegicus OX=10116 GN=Tpt1 PE=1 SV=1	0.00157261	0.000948441	0.000511104	0.000904933	0.00101714	0.00148636	0.742233	0.168762	1453	0.83878
sp|Q6AY72|CS025_RAT	UPF0449 protein C19orf25 homolog OS=Rattus norvegicus OX=10116 PE=3 SV=1	0.000744467	0.000997748	0.00107535	0.000475989	0.00107002	0.00104242	0.743551	-0.122374	1454	0.839691
sp|P18292|THRB_RAT	Prothrombin OS=Rattus norvegicus OX=10116 GN=F2 PE=1 SV=1	0.000219197	0.000352527	0.000237466	0.000252267	0.000330804	0.000276233	0.744196	0.086688	1455	0.839842
sp|Q6U6G5|ZC3HF_RAT	Zinc finger CCCH domain-containing protein 15 OS=Rattus norvegicus OX=10116 GN=Zc3h15 PE=1 SV=1	0.000253981	0.000446762	0.000343935	0.000426268	0.000273784	0.000266722	0.750489	-0.111808	1456	0.846362
sp|P50475|SYAC_RAT	Alanine--tRNA ligase, cytoplasmic OS=Rattus norvegicus OX=10116 GN=Aars1 PE=1 SV=3	0.000279431	0.000280874	0.000242176	0.000375186	0.000240975	0.00023476	0.751149	0.0845559	1457	0.846525
sp|P46418|GSTA5_RAT	Glutathione S-transferase alpha-5 OS=Rattus norvegicus OX=10116 GN=Gsta5 PE=1 SV=2	0.000856754	0.000861179	0.000662971	0.000821674	0.000527746	0.000899735	0.753843	-0.0821257	1458	0.848978
sp|A0A0G2K047|ACSS3_RAT	Acyl-CoA synthetase short-chain family member 3, mitochondrial OS=Rattus norvegicus OX=10116 GN=Acss3 PE=1 SV=1	1.33575e-06	2.151e-06	8.58076e-05	3.79816e-05	8.53821e-05	1.17e-06	0.767608	0.479895	1459	0.863888
sp|Q4QQW3|HOT_RAT	Hydroxyacid-oxoacid transhydrogenase, mitochondrial OS=Rattus norvegicus OX=10116 GN=Adhfe1 PE=1 SV=1	0.000695048	0.000582198	0.000564732	0.000499942	0.000437058	0.000790743	0.759855	-0.0923674	1460	0.854576
sp|P11960|ODBA_RAT	2-oxoisovalerate dehydrogenase subunit alpha, mitochondrial (Fragment) OS=Rattus norvegicus OX=10116 GN=Bckdha PE=1 SV=1	0.000674691	0.000739827	0.00026579	0.000529417	0.000595061	0.000708538	0.762462	0.125494	1461	0.856922
sp|P62850|RS24_RAT	40S ribosomal protein S24 OS=Rattus norvegicus OX=10116 GN=Rps24 PE=2 SV=1	0.000406751	0.000204426	0.000220326	0.000585145	2.13925e-06	0.000427157	0.759232	0.286892	1462	0.852707
sp|Q9R0T4|CADH1_RAT	Cadherin-1 OS=Rattus norvegicus OX=10116 GN=Cdh1 PE=1 SV=1	6.10586e-05	6.13739e-05	0.000132295	0.000117117	2.13925e-06	9.61826e-05	0.773668	-0.241675	1463	0.868327
sp|P13676|ACPH_RAT	Acylamino-acid-releasing enzyme OS=Rattus norvegicus OX=10116 GN=Apeh PE=1 SV=1	0.000147809	0.000185715	0.000640509	0.00038983	0.000278833	0.000465671	0.765461	0.219804	1464	0.858529
sp|P52504|NDUS6_RAT	NADH dehydrogenase [ubiquinone] iron-sulfur protein 6, mitochondrial OS=Rattus norvegicus OX=10116 GN=Ndufs6 PE=3 SV=1	0.000699542	0.000703155	0.00126307	0.000670899	0.00100545	0.00122439	0.766943	0.121869	1465	0.859604
sp|Q5BJK8|GOLI4_RAT	Golgi integral membrane protein 4 OS=Rattus norvegicus OX=10116 GN=Golim4 PE=1 SV=2	8.28452e-05	0.000166546	0.000224374	1.44039e-06	0.000312566	0.000261004	0.763283	0.279415	1466	0.854918
sp|O35094|TIM44_RAT	Mitochondrial import inner membrane translocase subunit TIM44 OS=Rattus norvegicus OX=10116 GN=Timm44 PE=1 SV=1	0.000417975	0.000120038	0.000194062	0.000458127	2.13925e-06	0.000438944	0.764549	0.296666	1467	0.855752
sp|Q8K4G6|MACD1_RAT	ADP-ribose glycohydrolase MACROD1 (Fragment) OS=Rattus norvegicus OX=10116 GN=Macrod1 PE=2 SV=2	0.000209682	0.000210765	1.44708e-06	0.000201096	2.13925e-06	0.000330302	0.768471	0.338709	1468	0.859557
sp|P02692|FABPL_RAT	Fatty acid-binding protein, liver OS=Rattus norvegicus OX=10116 GN=Fabp1 PE=1 SV=1	0.0464305	0.0473125	0.0456855	0.0502487	0.0424742	0.0445101	0.773329	-0.0228973	1469	0.864402
sp|Q9WU49|CHSP1_RAT	Calcium-regulated heat stable protein 1 OS=Rattus norvegicus OX=10116 GN=Carhsp1 PE=1 SV=1	0.00110404	0.000739827	0.000598027	0.000882361	0.00119012	0.000579713	0.777467	0.119188	1470	0.868436
sp|Q63525|NUDC_RAT	Nuclear migration protein nudC OS=Rattus norvegicus OX=10116 GN=Nudc PE=1 SV=1	0.000407364	0.000409467	0.000353052	0.000390684	0.00017565	0.00051336	0.779544	-0.115741	1471	0.870164
sp|Q499N6|UBXN1_RAT	UBX domain-containing protein 1 OS=Rattus norvegicus OX=10116 GN=Ubxn1 PE=3 SV=2	0.000637518	0.000915442	0.00069065	0.000873449	0.000687225	0.000573857	0.780508	-0.071903	1472	0.870648
sp|P46413|GSHB_RAT	Glutathione synthetase OS=Rattus norvegicus OX=10116 GN=Gss PE=1 SV=1	0.000913045	0.0011472	0.00123643	0.0011493	0.00123029	0.00101878	0.781775	0.0438355	1473	0.871469
sp|P62775|MTPN_RAT	Myotrophin OS=Rattus norvegicus OX=10116 GN=Mtpn PE=1 SV=2	0.00114614	0.000921649	0.000496666	0.00087937	0.000988406	0.000481457	0.784181	-0.126464	1474	0.873559
sp|P34058|HS90B_RAT	Heat shock protein HSP 90-beta OS=Rattus norvegicus OX=10116 GN=Hsp90ab1 PE=1 SV=4	0.000635128	0.000826174	0.000647587	0.000931598	0.000483281	0.000823929	0.78513	0.0862483	1475	0.874022
sp|P20171|RASH_RAT	GTPase HRas OS=Rattus norvegicus OX=10116 GN=Hras PE=1 SV=2	0.000715581	0.000575421	0.0013954	0.000549025	0.00138848	0.00105207	0.788057	0.154266	1476	0.876686
sp|P14480|FIBB_RAT	Fibrinogen beta chain OS=Rattus norvegicus OX=10116 GN=Fgb PE=1 SV=4	0.00141174	0.00141903	0.00122352	0.00135394	0.0013392	0.00130466	0.788402	-0.0202473	1477	0.876477
sp|Q5I0L4|NUBP1_RAT	Cytosolic Fe-S cluster assembly factor NUBP1 OS=Rattus norvegicus OX=10116 GN=Nubp1 PE=1 SV=1	8.4528e-05	8.49645e-05	1.44708e-06	0.000243201	2.13925e-06	1.17e-06	0.782127	0.52816	1478	0.868913
sp|P20814|CP2CD_RAT	Cytochrome P450 2C13, male-specific OS=Rattus norvegicus OX=10116 GN=Cyp2c13 PE=1 SV=1	0.000220808	0.000110974	5.98027e-05	0.000211767	0.000178518	5.79713e-05	0.790829	0.195	1479	0.877986
sp|Q711G3|IAH1_RAT	Isoamyl acetate-hydrolyzing esterase 1 homolog OS=Rattus norvegicus OX=10116 GN=Iah1 PE=2 SV=2	0.000325891	2.151e-06	0.000353052	0.000208365	2.13925e-06	0.00034224	0.789583	-0.301242	1480	0.87601
sp|Q9WUS0|KAD4_RAT	Adenylate kinase 4, mitochondrial OS=Rattus norvegicus OX=10116 GN=Ak4 PE=2 SV=1	0.00145555	0.00158499	0.00131405	0.00127962	0.00183055	0.00140119	0.791068	0.0510256	1481	0.877065
sp|Q00438|PTBP1_RAT	Polypyrimidine tract-binding protein 1 OS=Rattus norvegicus OX=10116 GN=Ptbp1 PE=1 SV=1	0.000877264	0.0012737	0.00121437	0.00102831	0.00110327	0.001126	0.791241	-0.0469482	1482	0.876665
sp|Q4QQV8|CHMP5_RAT	Charged multivesicular body protein 5 OS=Rattus norvegicus OX=10116 GN=Chmp5 PE=2 SV=1	0.000370534	0.000496596	0.000401415	0.000236908	0.000266283	0.000648537	0.791676	-0.139374	1483	0.876556
sp|Q920P0|DCXR_RAT	L-xylulose reductase OS=Rattus norvegicus OX=10116 GN=Dcxr PE=1 SV=1	0.000332569	2.151e-06	1.44708e-06	0.000212635	2.13925e-06	0.000232836	0.793341	0.413061	1484	0.877807
sp|Q63767|BCAR1_RAT	Breast cancer anti-estrogen resistance protein 1 OS=Rattus norvegicus OX=10116 GN=Bcar1 PE=1 SV=1	1.33575e-06	2.151e-06	9.0816e-05	1.44039e-06	6.02438e-05	1.17e-06	0.783072	-0.585292	1485	0.865861
sp|Q5U2Z3|NP1L4_RAT	Nucleosome assembly protein 1-like 4 OS=Rattus norvegicus OX=10116 GN=Nap1l4 PE=1 SV=1	1.33575e-06	2.151e-06	0.000227746	1.44039e-06	0.000151078	1.17e-06	0.789072	-0.58934	1486	0.871909
sp|F1LNJ2|U520_RAT	U5 small nuclear ribonucleoprotein 200 kDa helicase OS=Rattus norvegicus OX=10116 GN=Snrnp200 PE=1 SV=1	6.32281e-05	5.08436e-05	8.21972e-05	4.85113e-05	4.08948e-05	0.0001328	0.793032	0.179067	1487	0.875695
sp|Q5U2Q3|CK054_RAT	Ester hydrolase C11orf54 homolog OS=Rattus norvegicus OX=10116 PE=1 SV=1	0.000772827	0.000776818	0.000651185	0.000494122	0.00092565	0.000901776	0.796467	0.0770394	1488	0.878897
sp|P31000|VIME_RAT	Vimentin OS=Rattus norvegicus OX=10116 GN=Vim PE=1 SV=2	0.00255398	0.00210041	0.00201224	0.00250507	0.00181455	0.00213349	0.798385	-0.0469618	1489	0.880422
sp|P41498|PPAC_RAT	Low molecular weight phosphotyrosine protein phosphatase OS=Rattus norvegicus OX=10116 GN=Acp1 PE=1 SV=3	0.00085598	0.00068832	1.44708e-06	0.000492559	0.000553633	0.000719138	0.799766	0.191633	1490	0.881353
sp|P52847|ST1B1_RAT	Sulfotransferase family cytosolic 1B member 1 OS=Rattus norvegicus OX=10116 GN=Sult1b1 PE=1 SV=2	0.000814183	0.000909319	0.000784035	0.000954367	0.000682628	0.000950031	0.799205	0.0450239	1491	0.880144
sp|P49911|AN32A_RAT	Acidic leucine-rich nuclear phosphoprotein 32 family member A OS=Rattus norvegicus OX=10116 GN=Anp32a PE=2 SV=1	0.00065706	0.000550377	0.000237274	0.000840208	0.000118049	0.000690023	0.802195	0.19018	1492	0.882845
sp|Q6MGD0|CUTA_RAT	Protein CutA OS=Rattus norvegicus OX=10116 GN=Cuta PE=1 SV=2	0.000611276	0.000307216	1.44708e-06	0.000293123	0.000164734	0.000641942	0.804353	0.25763	1493	0.884627
sp|P12346|TRFE_RAT	Serotransferrin OS=Rattus norvegicus OX=10116 GN=Tf PE=1 SV=3	0.00236388	0.00214237	0.00247693	0.00204409	0.00258996	0.00219759	0.80343	-0.0316487	1494	0.88302
sp|Q9JM53|AIFM1_RAT	Apoptosis-inducing factor 1, mitochondrial OS=Rattus norvegicus OX=10116 GN=Aifm1 PE=1 SV=1	0.000618767	0.000488685	0.000335169	0.000381492	0.000333506	0.000881884	0.803627	0.146566	1495	0.882646
sp|P62859|RS28_RAT	40S ribosomal protein S28 OS=Rattus norvegicus OX=10116 GN=Rps28 PE=1 SV=1	0.0027441	0.00157615	0.00254811	0.00225578	0.00126774	0.00288176	0.807339	-0.100706	1496	0.88613
sp|A2VCW9|AASS_RAT	Alpha-aminoadipic semialdehyde synthase, mitochondrial OS=Rattus norvegicus OX=10116 GN=Aass PE=2 SV=1	0.000467369	0.000440421	0.000284805	0.000448232	0.000409345	0.000276084	0.811598	-0.0731148	1497	0.89021
sp|P04550|PTMS_RAT	Parathymosin OS=Rattus norvegicus OX=10116 GN=Ptms PE=1 SV=2	0.00397779	0.00453144	0.0045966	0.00406924	0.00428794	0.00501281	0.811762	0.0287905	1498	0.889795
sp|Q63507|RL14_RAT	60S ribosomal protein L14 OS=Rattus norvegicus OX=10116 GN=Rpl14 PE=1 SV=3	0.000252794	2.151e-06	1.44708e-06	0.000363665	2.13925e-06	1.17e-06	0.814159	0.517326	1499	0.891827
sp|P48675|DESM_RAT	Desmin OS=Rattus norvegicus OX=10116 GN=Des PE=1 SV=2	0.000865105	0.000521744	0.000499843	0.000829683	0.000559535	0.00060567	0.815496	0.0804488	1500	0.892696
sp|P40615|DKC1_RAT	H/ACA ribonucleoprotein complex subunit DKC1 OS=Rattus norvegicus OX=10116 GN=Dkc1 PE=1 SV=4	0.000159424	5.34158e-05	5.75703e-05	0.000101931	2.13925e-06	0.000223229	0.80714	0.275462	1501	0.882961
sp|Q9JHW0|PSB7_RAT	Proteasome subunit beta type-7 OS=Rattus norvegicus OX=10116 GN=Psmb7 PE=1 SV=1	0.000488248	0.000392616	1.44708e-06	1.44039e-06	0.000210527	0.000512743	0.814992	-0.283884	1502	0.890957
sp|P10716|CLC4F_RAT	C-type lectin domain family 4 member F OS=Rattus norvegicus OX=10116 GN=Clec4f PE=1 SV=1	0.00029508	0.000346037	0.000159836	0.000141499	0.000318087	0.000413177	0.817355	0.123872	1503	0.892946
sp|P01048|KNT1_RAT	T-kininogen 1 OS=Rattus norvegicus OX=10116 GN=Map1 PE=1 SV=2	0.000629046	0.000442606	0.000408883	0.00054296	0.000339046	0.000528483	0.81773	-0.0699231	1504	0.892762
sp|P11530|DMD_RAT	Dystrophin OS=Rattus norvegicus OX=10116 GN=Dmd PE=1 SV=2	2.20688e-05	2.151e-06	1.44708e-06	1.44039e-06	2.13925e-06	1.54506e-05	0.799556	-0.431612	1505	0.87234
sp|P83868|TEBP_RAT	Prostaglandin E synthase 3 OS=Rattus norvegicus OX=10116 GN=Ptges3 PE=1 SV=2	0.000338112	0.000509787	1.44708e-06	0.000162134	2.13925e-06	0.000532611	0.826118	-0.285433	1506	0.900721
sp|Q5BK81|PTGR2_RAT	Prostaglandin reductase 2 OS=Rattus norvegicus OX=10116 GN=Ptgr2 PE=2 SV=2	0.000693563	0.000542224	0.000417426	0.000665165	0.000332285	0.0005665	0.82621	-0.0800784	1507	0.900223
sp|P24587|AKAP5_RAT	A-kinase anchor protein 5 OS=Rattus norvegicus OX=10116 GN=Akap5 PE=1 SV=2	1.33575e-06	3.80793e-05	0.000205205	0.000181663	2.13925e-06	0.000119353	0.823375	0.309509	1508	0.89654
sp|P60825|CIRBP_RAT	Cold-inducible RNA-binding protein OS=Rattus norvegicus OX=10116 GN=Cirbp PE=2 SV=1	0.000157261	0.000316147	0.000340736	0.000603289	0.000339046	1.17e-06	0.82575	0.212746	1509	0.89853
sp|Q7TNY6|GCP60_RAT	Golgi resident protein GCP60 OS=Rattus norvegicus OX=10116 GN=Acbd3 PE=1 SV=3	1.33575e-06	0.000155068	1.44708e-06	1.44039e-06	0.000110867	1.17e-06	0.825666	-0.476162	1510	0.897844
sp|P54311|GBB1_RAT	Guanine nucleotide-binding protein G(I)/G(S)/G(T) subunit beta-1 OS=Rattus norvegicus OX=10116 GN=Gnb1 PE=1 SV=4	0.000238667	0.0002399	8.61862e-05	7.62983e-05	8.57588e-05	0.000334187	0.828305	-0.186569	1511	0.900117
sp|Q5I0J9|ASPD_RAT	Putative L-aspartate dehydrogenase OS=Rattus norvegicus OX=10116 GN=Aspdh PE=2 SV=1	0.000182148	0.000183088	1.44708e-06	1.44039e-06	2.13925e-06	0.000286929	0.832654	-0.335956	1512	0.904245
sp|Q99JE6|PLCB3_RAT	1-phosphatidylinositol 4,5-bisphosphate phosphodiesterase beta-3 OS=Rattus norvegicus OX=10116 GN=Plcb3 PE=1 SV=2	4.38395e-05	4.40659e-05	1.44708e-06	1.44039e-06	2.13925e-06	6.90582e-05	0.843895	-0.298786	1513	0.915846
sp|O35987|NSF1C_RAT	NSFL1 cofactor p47 OS=Rattus norvegicus OX=10116 GN=Nsfl1c PE=1 SV=1	0.00146211	0.00132269	0.00142557	0.00147235	0.00181252	0.00107482	0.829988	0.0502821	1514	0.900159
sp|P17475|A1AT_RAT	Alpha-1-antiproteinase OS=Rattus norvegicus OX=10116 GN=Serpina1 PE=1 SV=2	0.000592313	0.00026461	0.000427785	0.000378707	0.000425664	0.000414685	0.830264	-0.0756762	1515	0.899863
sp|P81827|UP1_RAT	Urinary protein 1 OS=Rattus norvegicus OX=10116 PE=1 SV=1	0.00133906	0.00188436	0.00174079	0.00102738	0.00202085	0.00168748	0.831013	-0.0679817	1516	0.900081
sp|P05544|SPA3L_RAT	Serine protease inhibitor A3L OS=Rattus norvegicus OX=10116 GN=Serpina3l PE=1 SV=3	0.00124438	0.00118498	0.000851428	0.00087937	0.00112961	0.00116925	0.833375	-0.0458194	1517	0.902045
sp|Q5XIF3|NDUS4_RAT	NADH dehydrogenase [ubiquinone] iron-sulfur protein 4, mitochondrial OS=Rattus norvegicus OX=10116 GN=Ndufs4 PE=1 SV=1	0.00170022	0.00139827	0.00133958	0.00148237	0.000999702	0.00178552	0.834326	-0.0565135	1518	0.902479
sp|Q9JK25|CLIP1_RAT	CAP-Gly domain-containing linker protein 1 OS=Rattus norvegicus OX=10116 GN=Clip1 PE=1 SV=2	6.14749e-05	0.000102987	0.000244194	7.86104e-05	0.000198804	8.60786e-05	0.834683	-0.168959	1519	0.902271
sp|Q66HD0|ENPL_RAT	Endoplasmin OS=Rattus norvegicus OX=10116 GN=Hsp90b1 PE=1 SV=2	0.00164851	0.00135267	0.00138498	0.00154874	0.00126932	0.00148389	0.834787	-0.0279671	1520	0.901789
sp|P58200|VTI1B_RAT	Vesicle transport through interaction with t-SNAREs homolog 1B OS=Rattus norvegicus OX=10116 GN=Vti1b PE=1 SV=2	0.000233181	0.00046877	1.44708e-06	0.000111816	0.000251362	0.000244879	0.834292	-0.210133	1521	0.900662
sp|Q9Z1Y3|CADH2_RAT	Cadherin-2 OS=Rattus norvegicus OX=10116 GN=Cdh2 PE=1 SV=1	0.000358264	0.000150048	0.000388123	0.00020043	0.000450565	0.000313531	0.838076	0.105621	1522	0.904153
sp|P08644|RASK_RAT	GTPase KRas OS=Rattus norvegicus OX=10116 GN=Kras PE=1 SV=3	0.000572465	2.151e-06	0.00124035	0.000274512	0.0012342	0.000601184	0.839644	0.217229	1523	0.90525
sp|P19234|NDUV2_RAT	NADH dehydrogenase [ubiquinone] flavoprotein 2, mitochondrial OS=Rattus norvegicus OX=10116 GN=Ndufv2 PE=1 SV=2	0.00250857	0.00285042	0.0034266	0.00292887	0.00376232	0.00240534	0.838736	0.0501773	1524	0.903678
sp|P11517|HBB2_RAT	Hemoglobin subunit beta-2 OS=Rattus norvegicus OX=10116 PE=1 SV=2	0.00147205	0.0012947	0.00199342	0.00123531	0.00198354	0.00173914	0.838971	0.0587391	1525	0.903338
sp|P22062|PIMT_RAT	Protein-L-isoaspartate(D-aspartate) O-methyltransferase OS=Rattus norvegicus OX=10116 GN=Pcmt1 PE=1 SV=2	0.000357475	2.151e-06	0.000516358	0.000342838	0.000256899	0.000375409	0.842618	0.154713	1526	0.90667
sp|Q793F9|VPS4A_RAT	Vacuolar protein sorting-associated protein 4A OS=Rattus norvegicus OX=10116 GN=Vps4a PE=1 SV=1	0.000185691	2.151e-06	0.000134111	0.000118725	2.13925e-06	0.000260009	0.842134	0.242459	1527	0.905556
sp|P47245|NRDC_RAT	Nardilysin OS=Rattus norvegicus OX=10116 GN=Nrdc PE=1 SV=1	1.33575e-06	2.151e-06	0.000151438	4.46881e-05	5.02291e-05	2.44668e-05	0.826074	-0.375961	1528	0.887705
sp|P49890|STE2_RAT	Estrogen sulfotransferase Ste2 OS=Rattus norvegicus OX=10116 GN=Ste2 PE=1 SV=1	0.000183383	0.00036866	0.000595999	0.000439685	2.13925e-06	0.000577748	0.848772	-0.171211	1529	0.911501
sp|D4AAT7|NNRD_RAT	ATP-dependent (S)-NAD(P)H-hydrate dehydratase OS=Rattus norvegicus OX=10116 GN=Naxd PE=3 SV=1	0.00023658	2.151e-06	8.54324e-05	1.44039e-06	0.000255026	1.17e-06	0.848588	-0.331384	1530	0.910707
sp|Q5RKH6|OS9_RAT	Protein OS-9 OS=Rattus norvegicus OX=10116 GN=Os9 PE=1 SV=1	0.000284298	0.000408238	0.000571986	0.00035056	0.000350246	0.000639773	0.852035	0.0842635	1531	0.913809
sp|Q5U4E6|GOGA4_RAT	Golgin subfamily A member 4 OS=Rattus norvegicus OX=10116 GN=Golga4 PE=1 SV=2	0.000179608	7.22142e-05	0.000103774	0.000137803	0.000180705	1.17e-06	0.858116	-0.153624	1532	0.91973
sp|O35112|CD166_RAT	CD166 antigen OS=Rattus norvegicus OX=10116 GN=Alcam PE=1 SV=1	0.000417565	0.000373086	0.000150789	0.000355972	0.000250068	0.00038979	0.854367	0.0810296	1533	0.915115
sp|Q9WU82|CTNB1_RAT	Catenin beta-1 OS=Rattus norvegicus OX=10116 GN=Ctnnb1 PE=1 SV=1	0.000173169	0.000104438	1.44708e-06	0.000132863	7.46683e-05	3.63712e-05	0.847809	-0.19424	1534	0.907498
sp|Q99PS8|HRG_RAT	Histidine-rich glycoprotein OS=Rattus norvegicus OX=10116 GN=Hrg PE=1 SV=1	0.000309131	0.000362515	0.000334895	0.00044471	0.000222156	0.000378746	0.856975	0.0549415	1535	0.916712
sp|Q5FWY5|AIP_RAT	AH receptor-interacting protein OS=Rattus norvegicus OX=10116 GN=Aip PE=1 SV=1	0.000327866	0.00016478	0.000355192	0.000471662	0.000265073	0.000172157	0.857916	0.100321	1536	0.917121
sp|Q9Z158|STX17_RAT	Syntaxin-17 OS=Rattus norvegicus OX=10116 GN=Stx17 PE=1 SV=1	0.000269591	9.03277e-05	1.44708e-06	1.44039e-06	0.000290611	1.17e-06	0.864183	-0.301469	1537	0.92322
sp|P22734|COMT_RAT	Catechol O-methyltransferase OS=Rattus norvegicus OX=10116 GN=Comt PE=1 SV=2	0.0012295	0.0016478	0.000887979	0.00117916	0.000662681	0.00172157	0.866834	-0.0794967	1538	0.925449
sp|Q63768|CRK_RAT	Adapter molecule crk OS=Rattus norvegicus OX=10116 GN=Crk PE=1 SV=1	0.000533861	0.000626054	0.00077114	0.000597335	0.000479572	0.000934406	0.869511	0.0587486	1539	0.927705
sp|Q6AYE2|SHLB1_RAT	Endophilin-B1 OS=Rattus norvegicus OX=10116 GN=Sh3glb1 PE=2 SV=1	0.000148213	0.000148979	0.000160566	0.000355362	2.13925e-06	0.000155649	0.86559	0.164795	1540	0.922922
sp|P62278|RS13_RAT	40S ribosomal protein S13 OS=Rattus norvegicus OX=10116 GN=Rps13 PE=1 SV=2	0.00143306	0.000540172	0.000388123	0.00103079	0.000386198	0.000752475	0.873041	-0.122278	1541	0.930262
sp|Q63342|M2GD_RAT	Dimethylglycine dehydrogenase, mitochondrial OS=Rattus norvegicus OX=10116 GN=Dmgdh PE=1 SV=1	0.000410311	0.000317254	0.00023935	0.00033297	0.000238163	0.000364604	0.87567	-0.0472854	1542	0.932458
sp|P18666|ML12B_RAT	Myosin regulatory light chain 12B OS=Rattus norvegicus OX=10116 GN=Myl12b PE=1 SV=3	0.000629046	0.00047422	0.00102221	0.000452467	0.000508569	0.00132121	0.879924	0.102667	1543	0.93638
sp|P0C2X9|AL4A1_RAT	Delta-1-pyrroline-5-carboxylate dehydrogenase, mitochondrial OS=Rattus norvegicus OX=10116 GN=Aldh4a1 PE=1 SV=1	0.00115306	0.00120731	0.000988921	0.00124408	0.0010876	0.00105955	0.880442	0.0179492	1544	0.936325
sp|P52873|PYC_RAT	Pyruvate carboxylase, mitochondrial OS=Rattus norvegicus OX=10116 GN=Pc PE=1 SV=2	0.00153844	0.00136174	0.000995019	0.00129927	0.00111384	0.00139859	0.884929	-0.0312571	1545	0.940488
sp|O08629|TIF1B_RAT	Transcription intermediary factor 1-beta OS=Rattus norvegicus OX=10116 GN=Trim28 PE=1 SV=2	0.000550697	0.000586102	0.000631688	0.000403878	0.000768234	0.000646363	0.886544	0.040213	1546	0.941594
sp|P16617|PGK1_RAT	Phosphoglycerate kinase 1 OS=Rattus norvegicus OX=10116 GN=Pgk1 PE=1 SV=2	0.00168651	0.00136921	0.00119462	0.00149303	0.00132854	0.00149863	0.887405	0.0235232	1547	0.9419
sp|P04176|PH4H_RAT	Phenylalanine-4-hydroxylase OS=Rattus norvegicus OX=10116 GN=Pah PE=1 SV=3	0.00077624	0.000600191	0.000582185	0.000515393	0.000579298	0.000815181	0.889913	-0.0363583	1548	0.943952
sp|Q06647|ATPO_RAT	ATP synthase subunit O, mitochondrial OS=Rattus norvegicus OX=10116 GN=Atp5po PE=1 SV=1	0.00228583	0.00216999	0.00178846	0.00182686	0.00191649	0.0024005	0.892733	-0.0233919	1549	0.946332
sp|P00884|ALDOB_RAT	Fructose-bisphosphate aldolase B OS=Rattus norvegicus OX=10116 GN=Aldob PE=1 SV=2	0.00453293	0.00440695	0.00330065	0.00413352	0.00336438	0.00452622	0.896236	-0.0257336	1550	0.949432
sp|Q63270|ACOC_RAT	Cytoplasmic aconitate hydratase OS=Rattus norvegicus OX=10116 GN=Aco1 PE=1 SV=1	0.00024341	0.000305834	0.000296659	0.000350165	0.000196792	0.000319527	0.898981	0.0346808	1551	0.951726
sp|P02680|FIBG_RAT	Fibrinogen gamma chain OS=Rattus norvegicus OX=10116 GN=Fgg PE=1 SV=3	0.000790194	0.000977569	0.000790201	0.000757839	0.00104838	0.000702169	0.900555	-0.0282375	1552	0.952778
sp|Q64119|MYL6_RAT	Myosin light polypeptide 6 OS=Rattus norvegicus OX=10116 GN=Myl6 PE=1 SV=3	0.00286612	0.0025208	0.00291092	0.00326415	0.00289649	0.00225743	0.906058	0.0207529	1553	0.957983
sp|P55063|HS71L_RAT	Heat shock 70 kDa protein 1-like OS=Rattus norvegicus OX=10116 GN=Hspa1l PE=2 SV=2	0.000421981	0.000466576	0.00018286	0.000364232	0.00027293	0.000398835	0.907819	-0.0484993	1554	0.959228
sp|P62271|RS18_RAT	40S ribosomal protein S18 OS=Rattus norvegicus OX=10116 GN=Rps18 PE=1 SV=3	0.000889768	0.000357745	0.000192785	0.00119467	0.000383658	1.17e-06	0.91533	0.133099	1555	0.966541
sp|Q9QYU1|PEX19_RAT	Peroxisomal biogenesis factor 19 OS=Rattus norvegicus OX=10116 GN=Pex19 PE=1 SV=1	0.000542789	0.00145491	0.00107805	0.000954367	0.000975183	0.00123504	0.920749	0.0410821	1556	0.971638
sp|Q04970|RASN_RAT	GTPase NRas OS=Rattus norvegicus OX=10116 GN=Nras PE=1 SV=1	0.00100181	2.151e-06	0.0013954	0.000137256	0.00154275	0.000901776	0.921619	0.105718	1557	0.971933
sp|Q5PQQ2|WBP11_RAT	WW domain-binding protein 11 OS=Rattus norvegicus OX=10116 GN=Wbp11 PE=1 SV=1	8.43961e-05	0.000296912	0.000320005	8.09405e-05	0.000363906	0.000221575	0.921514	-0.0736226	1558	0.971198
sp|Q923K9|A1CF_RAT	APOBEC1 complementation factor OS=Rattus norvegicus OX=10116 GN=A1cf PE=1 SV=1	0.000500907	0.000778126	0.000838647	0.000742431	0.000932663	0.000382572	0.921993	-0.0414758	1559	0.971079
sp|P10960|SAP_RAT	Prosaposin OS=Rattus norvegicus OX=10116 GN=Psap PE=1 SV=1	0.000537073	0.000785232	0.000899199	0.000655559	0.001	0.000615291	0.924132	0.0316981	1560	0.972708
sp|P07896|ECHP_RAT	Peroxisomal bifunctional enzyme OS=Rattus norvegicus OX=10116 GN=Ehhadh PE=1 SV=2	0.000412103	0.000414231	0.000284104	0.00025151	0.000444235	0.000393434	0.926281	-0.0278889	1561	0.974345
sp|Q8CG45|ARK72_RAT	Aflatoxin B1 aldehyde reductase member 2 OS=Rattus norvegicus OX=10116 GN=Akr7a2 PE=1 SV=2	0.000442217	0.000296334	0.000159691	0.000565481	2.13925e-06	0.000387002	0.92404	0.0878244	1562	0.971366
sp|P81155|VDAC2_RAT,sp|Q9R1Z0|VDAC3_RAT	Voltage-dependent anion-selective channel protein 2 OS=Rattus norvegicus OX=10116 GN=Vdac2 PE=1 SV=2,Voltage-dependent anion-selective channel protein 3 OS=Rattus norvegicus OX=10116 GN=Vdac3 PE=1 SV=2	1.33575e-06	2.151e-06	9.93332e-05	8.7937e-05	2.13925e-06	1.17e-06	0.933475	-0.172283	1563	0.980657
sp|B2GV24|UFL1_RAT	E3 UFM1-protein ligase 1 OS=Rattus norvegicus OX=10116 GN=Ufl1 PE=1 SV=1	1.33575e-06	2.151e-06	3.69525e-05	3.2713e-05	2.13925e-06	1.17e-06	0.929591	-0.166866	1564	0.975951
sp|P37285|KLC1_RAT	Kinesin light chain 1 OS=Rattus norvegicus OX=10116 GN=Klc1 PE=1 SV=2	1.33575e-06	2.151e-06	5.23273e-05	4.6324e-05	2.13925e-06	1.17e-06	0.931436	-0.169323	1565	0.977264
sp|P97532|THTM_RAT	3-mercaptopyruvate sulfurtransferase OS=Rattus norvegicus OX=10116 GN=Mpst PE=1 SV=3	0.000637518	0.000549265	0.00069065	0.000873449	0.0003927	0.000573857	0.93606	-0.0290513	1566	0.981488
sp|P68370|TBA1A_RAT,sp|Q6P9V9|TBA1B_RAT	Tubulin alpha-1A chain OS=Rattus norvegicus OX=10116 GN=Tuba1a PE=1 SV=1,Tubulin alpha-1B chain OS=Rattus norvegicus OX=10116 GN=Tuba1b PE=1 SV=1	1.33575e-06	2.151e-06	0.000974611	1.44039e-06	0.00109908	1.17e-06	0.936899	0.17167	1567	0.981741
sp|P07687|HYEP_RAT	Epoxide hydrolase 1 OS=Rattus norvegicus OX=10116 GN=Ephx1 PE=1 SV=1	5.94483e-05	2.151e-06	0.000128806	0.000171042	2.13925e-06	1.17e-06	0.940442	-0.127072	1568	0.984825
sp|Q9R1Z0|VDAC3_RAT	Voltage-dependent anion-selective channel protein 3 OS=Rattus norvegicus OX=10116 GN=Vdac3 PE=1 SV=2	9.55794e-05	9.60729e-05	1.44708e-06	1.44039e-06	0.000103032	0.000100374	0.936122	0.0851994	1569	0.979676
sp|Q68FX9|SIR5_RAT	NAD-dependent protein deacylase sirtuin-5, mitochondrial OS=Rattus norvegicus OX=10116 GN=Sirt5 PE=2 SV=1	8.72547e-05	8.77053e-05	1.44708e-06	1.44039e-06	9.4058e-05	9.1632e-05	0.936035	0.0851358	1570	0.978962
sp|Q810U0|CCD50_RAT	Coiled-coil domain-containing protein 50 OS=Rattus norvegicus OX=10116 GN=Ccdc50 PE=2 SV=1	8.86851e-05	8.91431e-05	1.44708e-06	1.44039e-06	9.55999e-05	9.31342e-05	0.936051	0.0851475	1571	0.978355
sp|P62982|RS27A_RAT	Ubiquitin-40S ribosomal protein S27a OS=Rattus norvegicus OX=10116 GN=Rps27a PE=1 SV=2	0.00225408	0.00244001	0.0022541	0.00266066	0.00205601	0.00218507	0.940233	-0.00967592	1572	0.982101
sp|P53042|PPP5_RAT	Serine/threonine-protein phosphatase 5 OS=Rattus norvegicus OX=10116 GN=Ppp5c PE=1 SV=1	1.33575e-06	5.44863e-05	5.87241e-05	0.000103974	2.13925e-06	1.17e-06	0.95322	-0.0945078	1573	0.995034
sp|D3ZD05|KANK2_RAT	KN motif and ankyrin repeat domain-containing protein 2 OS=Rattus norvegicus OX=10116 GN=Kank2 PE=1 SV=2	6.387e-05	0.0001284	1.44708e-06	1.44039e-06	6.885e-05	0.000134148	0.94949	0.0777201	1574	0.99051
sp|Q64563|ADH4_RAT	All-trans-retinol dehydrogenase [NAD(+)] ADH4 OS=Rattus norvegicus OX=10116 GN=Adh4 PE=2 SV=3	0.000286992	0.000288474	0.000233183	0.000550481	2.13925e-06	0.000226042	0.953247	-0.0545142	1575	0.993798
sp|P51652|AKC1H_RAT,sp|Q6AYQ2|AK1CL_RAT	Aldo-keto reductase family 1 member C18 OS=Rattus norvegicus OX=10116 GN=Akr1c18 PE=1 SV=1,Aldo-keto reductase family 1 member C21 OS=Rattus norvegicus OX=10116 GN=Akr1c21 PE=2 SV=1	8.37429e-05	8.41754e-05	0.000181445	0.000160628	2.13925e-06	0.000175888	0.958431	-0.0449083	1576	0.998568
sp|P09456|KAP0_RAT	cAMP-dependent protein kinase type I-alpha regulatory subunit OS=Rattus norvegicus OX=10116 GN=Prkar1a PE=1 SV=2	1.33575e-06	2.151e-06	0.000153823	6.80877e-05	2.13925e-06	7.45563e-05	0.943866	-0.119715	1577	0.98277
sp|Q3SWU3|HNRDL_RAT	Heterogeneous nuclear ribonucleoprotein D-like OS=Rattus norvegicus OX=10116 GN=Hnrnpdl PE=1 SV=1	0.000168006	0.000168874	0.000546024	0.000402817	0.000362211	8.82172e-05	0.953697	-0.0492958	1578	0.992377
sp|P15709|ST2A1_RAT	Sulfotransferase 2A1 OS=Rattus norvegicus OX=10116 GN=Sult2a1 PE=1 SV=4	0.000285728	2.151e-06	1.44708e-06	1.44039e-06	0.000205338	0.000100021	0.960832	0.0845959	1579	0.999168
sp|Q62847|ADDG_RAT	Gamma-adducin OS=Rattus norvegicus OX=10116 GN=Add3 PE=1 SV=2	1.33575e-06	2.151e-06	0.000207825	7.35927e-05	2.13925e-06	0.000120876	0.952226	-0.104048	1580	0.989591
sp|P47967|LEG5_RAT,sp|P97840|LEG9_RAT	Galectin-5 OS=Rattus norvegicus OX=10116 GN=Lgals5 PE=1 SV=2,Galectin-9 OS=Rattus norvegicus OX=10116 GN=Lgals9 PE=2 SV=2	0.000373089	2.151e-06	1.44708e-06	1.44039e-06	0.00020109	0.000195903	0.961224	0.0809698	1581	0.998311
sp|P25977|UBF1_RAT	Nucleolar transcription factor 1 OS=Rattus norvegicus OX=10116 GN=Ubtf PE=1 SV=1	0.000106213	0.000177936	0.000191776	0.000305593	2.13925e-06	0.000185903	0.951993	0.0527098	1582	0.988099
sp|Q62636|RAP1B_RAT	Ras-related protein Rap-1b OS=Rattus norvegicus OX=10116 GN=Rap1b PE=1 SV=2	0.00161706	0.0020687	0.00302588	0.00225578	0.00237701	0.00200694	0.958154	-0.0155422	1583	0.993866
sp|Q02765|CATS_RAT	Cathepsin S OS=Rattus norvegicus OX=10116 GN=Ctss PE=2 SV=1	1.33575e-06	0.000247169	0.000355192	0.000235831	0.000176715	0.000172157	0.955526	-0.0461193	1584	0.990514
sp|Q9ESV6|G3PT_RAT	Glyceraldehyde-3-phosphate dehydrogenase, testis-specific OS=Rattus norvegicus OX=10116 GN=Gapdhs PE=1 SV=1	0.000313067	0.000314683	0.000135663	0.000240198	0.000269981	0.000263018	0.959314	0.0183725	1585	0.993813
sp|Q00238|ICAM1_RAT	Intercellular adhesion molecule 1 OS=Rattus norvegicus OX=10116 GN=Icam1 PE=2 SV=1	9.92622e-05	2.151e-06	1.44708e-06	1.44039e-06	0.000107002	1.17e-06	0.964795	0.0917212	1586	0.998861
sp|O88453|SAFB1_RAT	Scaffold attachment factor B1 OS=Rattus norvegicus OX=10116 GN=Safb PE=1 SV=2	0.00031959	0.000262833	0.000314751	0.000195048	0.000407147	0.000305112	0.960367	0.0162027	1587	0.99365
sp|Q68A21|PURB_RAT	Transcriptional activator protein Pur-beta OS=Rattus norvegicus OX=10116 GN=Purb PE=1 SV=3	1.33575e-06	0.000172626	9.30264e-05	0.000164707	2.13925e-06	9.01776e-05	0.963513	-0.0548725	1588	0.996278
sp|P38652|PGM1_RAT	Phosphoglucomutase-1 OS=Rattus norvegicus OX=10116 GN=Pgm1 PE=1 SV=2	0.000144389	0.000241892	0.000104282	0.000323114	2.13925e-06	0.000151633	0.966271	-0.040795	1589	0.9985
sp|P62260|1433E_RAT	14-3-3 protein epsilon OS=Rattus norvegicus OX=10116 GN=Ywhae PE=1 SV=1	0.000424297	0.000533111	0.00022983	0.000305193	0.000343035	0.000556979	0.962071	0.0216724	1590	0.993534
sp|P31044|PEBP1_RAT	Phosphatidylethanolamine-binding protein 1 OS=Rattus norvegicus OX=10116 GN=Pebp1 PE=1 SV=3	0.00433941	0.00407103	0.00548458	0.00443917	0.0043659	0.00516472	0.96284	0.00774375	1591	0.993704
sp|P20280|RL21_RAT	60S ribosomal protein L21 OS=Rattus norvegicus OX=10116 GN=Rpl21 PE=1 SV=3	1.33575e-06	0.000509787	1.44708e-06	1.44039e-06	0.000546712	1.17e-06	0.96305	0.0999049	1592	0.993296
sp|P06686|AT1A2_RAT,sp|P06687|AT1A3_RAT	Sodium/potassium-transporting ATPase subunit alpha-2 OS=Rattus norvegicus OX=10116 GN=Atp1a2 PE=1 SV=1,Sodium/potassium-transporting ATPase subunit alpha-3 OS=Rattus norvegicus OX=10116 GN=Atp1a3 PE=1 SV=2	1.33575e-06	2.66555e-05	1.44708e-06	1.44039e-06	2.85863e-05	1.17e-06	0.964551	0.0836937	1593	0.99422
sp|Q2TA68|OPA1_RAT	Dynamin-like 120 kDa protein, mitochondrial OS=Rattus norvegicus OX=10116 GN=Opa1 PE=1 SV=1	2.8176e-05	5.6643e-05	3.05243e-05	1.44039e-06	0.000121492	1.17e-06	0.946763	0.105592	1594	0.975273
sp|Q5PQN7|LZIC_RAT	Protein LZIC OS=Rattus norvegicus OX=10116 GN=Lzic PE=2 SV=1	0.000427089	0.000715491	0.000462684	0.000409601	0.000613852	0.00059802	0.963837	0.0144955	1595	0.992238
sp|Q6MG60|DDAH2_RAT	N(G),N(G)-dimethylarginine dimethylaminohydrolase 2 OS=Rattus norvegicus OX=10116 GN=Ddah2 PE=1 SV=1	0.000189817	9.53987e-05	1.44708e-06	9.10225e-05	0.000102309	9.96699e-05	0.970927	0.0315504	1596	0.998911
sp|Q68FP1|GELS_RAT	Gelsolin OS=Rattus norvegicus OX=10116 GN=Gsn PE=1 SV=1	0.000242747	0.000139429	0.000112705	0.000133033	0.000149528	0.000218507	0.967458	0.0179253	1597	0.994719
sp|P82995|HS90A_RAT	Heat shock protein HSP 90-alpha OS=Rattus norvegicus OX=10116 GN=Hsp90aa1 PE=1 SV=3	0.00022141	0.000148369	0.000239863	0.000212345	0.000119337	0.000271271	0.968037	-0.0159203	1598	0.994691
sp|Q6AYC4|CAPG_RAT	Macrophage-capping protein OS=Rattus norvegicus OX=10116 GN=Capg PE=1 SV=1	0.000542529	0.000467426	0.000419818	0.000594646	0.000250642	0.000569747	0.968346	-0.0149503	1599	0.994386
sp|P19511|AT5F1_RAT	ATP synthase F(0) complex subunit B1, mitochondrial OS=Rattus norvegicus OX=10116 GN=Atp5pb PE=1 SV=1	0.00010566	0.000106206	1.44708e-06	0.000202667	2.13925e-06	1.17e-06	0.975719	-0.0504894	1600	1.00133
sp|Q9EPH8|PABP1_RAT	Polyadenylate-binding protein 1 OS=Rattus norvegicus OX=10116 GN=Pabpc1 PE=1 SV=1	0.00153107	0.00128248	0.00142831	0.00163154	0.00146707	0.00116125	0.971088	0.00610602	1601	0.995957
sp|P08081|CLCA_RAT	Clathrin light chain A OS=Rattus norvegicus OX=10116 GN=Clta PE=1 SV=1	0.000545342	0.000438526	0.000708951	0.000523013	0.000587863	0.0005727	0.971492	-0.00789968	1602	0.995749
sp|P26284|ODPA_RAT	Pyruvate dehydrogenase E1 component subunit alpha, somatic form, mitochondrial OS=Rattus norvegicus OX=10116 GN=Pdha1 PE=1 SV=2	0.000693563	0.00125486	0.00135246	0.00113078	0.00127099	0.000874029	0.973424	-0.011006	1603	0.997107
sp|P25409|ALAT1_RAT	Alanine aminotransferase 1 OS=Rattus norvegicus OX=10116 GN=Gpt PE=1 SV=2	0.000163603	2.151e-06	1.44708e-06	1.44039e-06	2.13925e-06	0.00017181	0.973839	0.0689836	1604	0.99691
sp|B0BNM1|NNRE_RAT	NAD(P)H-hydrate epimerase OS=Rattus norvegicus OX=10116 GN=Naxe PE=2 SV=1	9.59183e-05	2.151e-06	1.44708e-06	1.44039e-06	2.13925e-06	0.00010073	0.97368	0.0678702	1605	0.996126
sp|P51886|LUM_RAT	Lumican OS=Rattus norvegicus OX=10116 GN=Lum PE=1 SV=1	0.000720239	0.000965277	0.000520177	0.000537248	0.000517597	0.00117658	0.974463	0.0167321	1606	0.996307
sp|P62828|RAN_RAT	GTP-binding nuclear protein Ran OS=Rattus norvegicus OX=10116 GN=Ran PE=1 SV=3	1.33575e-06	0.00037762	1.44708e-06	0.000360298	2.13925e-06	1.17e-06	0.97577	-0.0651488	1607	0.997022
sp|P46844|BIEA_RAT	Biliverdin reductase A OS=Rattus norvegicus OX=10116 GN=Blvra PE=1 SV=1	1.33575e-06	9.21649e-05	1.44708e-06	8.7937e-05	2.13925e-06	1.17e-06	0.977838	-0.0573675	1608	0.998514
sp|Q9EPB1|DPP2_RAT	Dipeptidyl peptidase 2 OS=Rattus norvegicus OX=10116 GN=Dpp7 PE=1 SV=1	1.33575e-06	0.000108755	1.44708e-06	0.000103766	2.13925e-06	1.17e-06	0.977416	-0.0589065	1609	0.997463
sp|P35815|PPM1B_RAT	Protein phosphatase 1B OS=Rattus norvegicus OX=10116 GN=Ppm1b PE=2 SV=1	1.33575e-06	6.97145e-05	1.44708e-06	6.65165e-05	2.13925e-06	1.17e-06	0.978736	-0.0541685	1610	0.998189
sp|P05714|RAB4A_RAT,sp|P35284|RAB12_RAT,sp|P51146|RAB4B_RAT,sp|P51156|RAB26_RAT,sp|P61107|RAB14_RAT,sp|P62824|RAB3C_RAT,sp|P63012|RAB3A_RAT,sp|Q53B90|RAB43_RAT,sp|Q63941|RAB3B_RAT,sp|Q9WVB1|RAB6A_RAT	Ras-related protein Rab-4A OS=Rattus norvegicus OX=10116 GN=Rab4a PE=1 SV=3,Ras-related protein Rab-12 OS=Rattus norvegicus OX=10116 GN=Rab12 PE=1 SV=2,Ras-related protein Rab-4B OS=Rattus norvegicus OX=10116 GN=Rab4b PE=2 SV=1,Ras-related protein Rab-26 OS=Rattus norvegicus OX=10116 GN=Rab26 PE=2 SV=2,Ras-related protein Rab-14 OS=Rattus norvegicus OX=10116 GN=Rab14 PE=1 SV=3,Ras-related protein…	1.33575e-06	0.000124719	1.44708e-06	1.44039e-06	2.13925e-06	0.000130302	0.97314	0.0704503	1611	0.991865
sp|Q64654|CP51A_RAT	Lanosterol 14-alpha demethylase OS=Rattus norvegicus OX=10116 GN=Cyp51a1 PE=1 SV=1	1.33575e-06	5.4053e-05	1.44708e-06	1.44039e-06	2.13925e-06	5.6473e-05	0.968233	0.0794287	1612	0.986252
sp|P62138|PP1A_RAT,sp|P62142|PP1B_RAT,sp|P63088|PP1G_RAT	Serine/threonine-protein phosphatase PP1-alpha catalytic subunit OS=Rattus norvegicus OX=10116 GN=Ppp1ca PE=1 SV=1,Serine/threonine-protein phosphatase PP1-beta catalytic subunit OS=Rattus norvegicus OX=10116 GN=Ppp1cb PE=1 SV=3,Serine/threonine-protein phosphatase PP1-gamma catalytic subunit OS=Rattus norvegicus OX=10116 GN=Ppp1cc PE=1 SV=1	0.000163933	2.151e-06	1.44708e-06	0.000157221	2.13925e-06	1.17e-06	0.976636	-0.0615867	1613	0.994195
sp|D3ZZL9|GCC2_RAT	GRIP and coiled-coil domain-containing protein 2 OS=Rattus norvegicus OX=10116 GN=Gcc2 PE=1 SV=1	3.22203e-05	2.151e-06	1.44708e-06	3.0901e-05	2.13925e-06	1.17e-06	0.971437	-0.0662706	1614	0.98829
sp|Q498E0|TXD12_RAT	Thioredoxin domain-containing protein 12 OS=Rattus norvegicus OX=10116 GN=Txndc12 PE=2 SV=2	0.000318223	2.151e-06	1.44708e-06	0.000305193	2.13925e-06	1.17e-06	0.977223	-0.0609772	1615	0.993561
sp|Q9WVC0|SEPT7_RAT	Septin-7 OS=Rattus norvegicus OX=10116 GN=Septin7 PE=1 SV=1	0.000310195	0.000187078	0.000201628	0.000297493	2.13925e-06	0.000390907	0.983069	-0.0173622	1616	0.998886
sp|Q5PQX1|TOIP1_RAT	Torsin-1A-interacting protein 1 OS=Rattus norvegicus OX=10116 GN=Tor1aip1 PE=1 SV=1	0.000278377	0.000419722	0.000351841	0.000355972	0.000250068	0.000438514	0.980236	-0.00741962	1617	0.995392
sp|P62870|ELOB_RAT	Elongin-B OS=Rattus norvegicus OX=10116 GN=Elob PE=1 SV=1	0.000687685	2.151e-06	0.000496666	0.000439685	2.13925e-06	0.000722185	0.980782	-0.0276129	1618	0.99533
sp|Q91Y78|UCHL3_RAT	Ubiquitin carboxyl-terminal hydrolase isozyme L3 OS=Rattus norvegicus OX=10116 GN=Uchl3 PE=1 SV=1	0.000117604	0.000118211	1.44708e-06	0.000112789	0.000126774	1.17e-06	0.984387	0.0209461	1619	0.998372
sp|Q6P6T5|OCLN_RAT	Occludin OS=Rattus norvegicus OX=10116 GN=Ocln PE=1 SV=1	1.33575e-06	2.151e-06	0.000168088	1.44039e-06	2.13925e-06	0.00016294	0.983634	-0.04314	1620	0.996992
sp|Q6AXU4|RN181_RAT	E3 ubiquitin-protein ligase RNF181 OS=Rattus norvegicus OX=10116 GN=Rnf181 PE=1 SV=1	1.33575e-06	2.151e-06	0.000355192	1.44039e-06	2.13925e-06	0.000344314	0.983568	-0.0440427	1621	0.996311
sp|Q6AYC8|SH24A_RAT	SH2 domain-containing protein 4A OS=Rattus norvegicus OX=10116 GN=Sh2d4a PE=2 SV=1	1.33575e-06	2.151e-06	6.94391e-05	1.44039e-06	2.13925e-06	6.73126e-05	0.983814	-0.0408019	1622	0.995944
sp|P04916|RET4_RAT	Retinol-binding protein 4 OS=Rattus norvegicus OX=10116 GN=Rbp4 PE=1 SV=1	0.00121115	0.00175847	0.0011663	0.00154874	0.000870388	0.00169588	0.98354	-0.00731291	1623	0.995054
sp|Q641Y8|DDX1_RAT	ATP-dependent RNA helicase DDX1 OS=Rattus norvegicus OX=10116 GN=Ddx1 PE=1 SV=1	1.33575e-06	0.000183707	7.91981e-05	0.000140224	0.000118208	1.17e-06	0.983001	-0.0255526	1624	0.993896
sp|Q9JIL3|ILF3_RAT	Interleukin enhancer-binding factor 3 OS=Rattus norvegicus OX=10116 GN=Ilf3 PE=1 SV=2	6.03098e-05	6.06213e-05	0.000130672	5.78404e-05	6.50122e-05	0.000126671	0.983758	-0.011977	1625	0.99405
sp|Q5M876|ACY3_RAT	N-acyl-aromatic-L-amino acid amidohydrolase (carboxylate-forming) OS=Rattus norvegicus OX=10116 GN=Acy3 PE=1 SV=1	0.000339172	0.000511385	0.000459299	0.000487926	0.000548426	0.00026714	0.984018	-0.007026	1626	0.993701
sp|P21807|PERI_RAT	Peripherin OS=Rattus norvegicus OX=10116 GN=Prph PE=1 SV=1	0.000288985	0.000174286	0.000187842	0.000277152	0.000249214	0.000121393	0.986042	-0.00745107	1627	0.995132
sp|Q6PCT3|TPD54_RAT	Tumor protein D54 OS=Rattus norvegicus OX=10116 GN=Tpd52l2 PE=1 SV=1	0.000983599	0.00111226	0.00119877	0.000943324	0.0014579	0.000903825	0.986231	0.00455392	1628	0.994712
sp|P60868|RS20_RAT	40S ribosomal protein S20 OS=Rattus norvegicus OX=10116 GN=Rps20 PE=3 SV=1	0.00113651	2.151e-06	0.000738739	0.000653985	0.00049005	0.000716116	0.987283	-0.0133165	1629	0.995162
sp|Q91ZW1|TFAM_RAT	Transcription factor A, mitochondrial OS=Rattus norvegicus OX=10116 GN=Tfam PE=2 SV=1	0.000221713	0.000334287	1.44708e-06	0.000212635	2.13925e-06	0.000349253	0.988293	0.0169314	1630	0.995569
sp|Q78P75|DYL2_RAT	Dynein light chain 2, cytoplasmic OS=Rattus norvegicus OX=10116 GN=Dynll2 PE=1 SV=1	0.000607842	0.00122196	0.000658501	0.00087443	0.000982853	0.000638336	0.991746	0.00423465	1631	0.998434
sp|Q6B345|S10AB_RAT	Protein S100-A11 OS=Rattus norvegicus OX=10116 GN=S100a11 PE=3 SV=1	0.00055202	0.00055487	0.000598027	0.000529417	0.000595061	0.000579713	0.99268	-0.000614343	1632	0.998763
sp|O89000|DPYD_RAT	Dihydropyrimidine dehydrogenase [NADP(+)] OS=Rattus norvegicus OX=10116 GN=Dpyd PE=2 SV=1	2.63892e-05	2.65255e-05	2.85886e-05	2.53087e-05	2.84468e-05	2.77131e-05	0.99268	-0.000614343	1633	0.998151
sp|Q9R0J8|LGMN_RAT	Legumain OS=Rattus norvegicus OX=10116 GN=Lgmn PE=1 SV=1	6.21815e-05	6.25026e-05	6.73639e-05	5.96355e-05	6.70298e-05	6.5301e-05	0.99268	-0.000614343	1634	0.99754
sp|P35171|CX7A2_RAT	Cytochrome c oxidase subunit 7A2, mitochondrial OS=Rattus norvegicus OX=10116 GN=Cox7a2 PE=1 SV=1	0.000325891	2.151e-06	0.000353052	1.44039e-06	2.13925e-06	0.00068448	0.993142	0.0146805	1635	0.997394
sp|Q62967|MVD1_RAT	Diphosphomevalonate decarboxylase OS=Rattus norvegicus OX=10116 GN=Mvd PE=1 SV=2	6.74538e-05	0.000135604	0.000219227	0.000129384	0.000290853	1.17e-06	0.997679	-0.00300386	1636	1.00134
sp|P07153|RPN1_RAT	Dolichyl-diphosphooligosaccharide--protein glycosyltransferase subunit 1 OS=Rattus norvegicus OX=10116 GN=Rpn1 PE=2 SV=1	0.000760053	0.000539279	0.000484352	0.000643176	0.000433755	0.000704279	0.994736	-0.00200257	1637	0.997774
sp|Q63396|TCP4_RAT	Activated RNA polymerase II transcriptional coactivator p15 OS=Rattus norvegicus OX=10116 GN=Sub1 PE=1 SV=3	0.000851936	2.151e-06	1.44708e-06	0.000408526	2.13925e-06	0.000447338	0.998053	0.00415796	1638	1.00049
sp|Q7TQ20|DNJC2_RAT	DnaJ homolog subfamily C member 2 OS=Rattus norvegicus OX=10116 GN=Dnajc2 PE=1 SV=1	1.33575e-06	2.151e-06	9.43746e-05	1.44039e-06	9.39065e-05	1.17e-06	0.992302	-0.0199567	1639	0.994118
sp|P62815|VATB2_RAT	V-type proton ATPase subunit B, brain isoform OS=Rattus norvegicus OX=10116 GN=Atp6v1b2 PE=1 SV=1	0.000105867	0.00031924	0.000172035	0.00025383	0.000342364	1.17e-06	0.999539	0.000535094	1640	1.00076
sp|P23358|RL12_RAT	60S ribosomal protein L12 OS=Rattus norvegicus OX=10116 GN=Rpl12 PE=2 SV=1	0.00131146	0.00181258	0.00142077	0.00141499	0.00123701	0.00189373	0.999079	0.000290071	1641	0.999688

## Sheet: kidney
Protein ID	Protein Name	KC1	KC2	KC3	KA1	KA2	KA3	pValue	Log2FC	Ranking	FDR
sp|Q5PQP1|RBMS1_RAT	RNA-binding motif, single-stranded-interacting protein 1 OS=Rattus norvegicus OX=10116 GN=Rbms1 PE=2 SV=1	6.87468e-05	7.17299e-05	7.32198e-05	1.18424e-06	1.53311e-06	1.15e-06	7.60926e-07	-5.78808	1	0.00117487
sp|Q3SWU3|HNRDL_RAT	Heterogeneous nuclear ribonucleoprotein D-like OS=Rattus norvegicus OX=10116 GN=Hnrnpdl PE=1 SV=1	0.000172081	0.000179548	0.000183277	1.18424e-06	1.53311e-06	1.15e-06	7.17727e-07	-7.11179	2	0.000554085
sp|Q3MIE4|VAT1_RAT	Synaptic vesicle membrane protein VAT-1 homolog OS=Rattus norvegicus OX=10116 GN=Vat1 PE=1 SV=1	0.00020573	0.000214657	0.000219116	1.18424e-06	1.53311e-06	1.15e-06	7.13729e-07	-7.36946	3	0.000367333
sp|Q5XIE3|RM11_RAT	39S ribosomal protein L11, mitochondrial OS=Rattus norvegicus OX=10116 GN=Mrpl11 PE=2 SV=1	0.000136478	0.0001424	0.000145358	1.18424e-06	1.53311e-06	1.15e-06	7.24377e-07	-6.77738	4	0.00027961
sp|Q9Z250|LIN7A_RAT,sp|Q9Z252|LIN7B_RAT	Protein lin-7 homolog A OS=Rattus norvegicus OX=10116 GN=Lin7a PE=1 SV=2,Protein lin-7 homolog B OS=Rattus norvegicus OX=10116 GN=Lin7b PE=1 SV=1	0.000119418	0.0001246	0.000127188	1.18424e-06	1.53311e-06	1.15e-06	7.29171e-07	-6.58473	5	0.000225168
sp|P12001|RL18_RAT	60S ribosomal protein L18 OS=Rattus norvegicus OX=10116 GN=Rpl18 PE=1 SV=2	1.19469e-06	1.92202e-06	1.26969e-06	0.000142297	0.000149927	0.000153743	1.64801e-06	6.66776	6	0.000424089
sp|P83941|ELOC_RAT	Elongin-C OS=Rattus norvegicus OX=10116 GN=Eloc PE=1 SV=1	1.19469e-06	1.92202e-06	1.26969e-06	0.000477713	0.000503325	0.000516138	1.58926e-06	8.41499	7	0.000350545
sp|P82995|HS90A_RAT	Heat shock protein HSP 90-alpha OS=Rattus norvegicus OX=10116 GN=Hsp90aa1 PE=1 SV=3	0.00034017	0.000315494	0.000281791	0.000766426	0.000769065	0.000788643	1.46305e-05	1.30987	8	0.00282369
sp|P36972|APT_RAT	Adenine phosphoribosyltransferase OS=Rattus norvegicus OX=10116 GN=Aprt PE=1 SV=1	1.19469e-06	1.92202e-06	1.26969e-06	0.000743108	0.000626361	0.000642306	5.23695e-05	8.84121	9	0.00898427
sp|Q10758|K2C8_RAT	Keratin, type II cytoskeletal 8 OS=Rattus norvegicus OX=10116 GN=Krt8 PE=1 SV=3	0.00149136	0.00155608	0.00146622	0.000664644	0.000525209	0.000538579	5.72154e-05	-1.38483	10	0.00883407
sp|P04764|ENOA_RAT	Alpha-enolase OS=Rattus norvegicus OX=10116 GN=Eno1 PE=1 SV=4	0.0028088	0.00266425	0.00299155	0.00462302	0.00422144	0.0045287	0.000442497	0.659826	11	0.0621105
sp|Q5PQT3|GLYAT_RAT	Glycine N-acyltransferase OS=Rattus norvegicus OX=10116 GN=Glyat PE=2 SV=1	0.000467989	0.000585956	0.000299063	0.00126529	0.00133313	0.00136707	0.000597336	1.55133	12	0.0768572
sp|Q6PEC1|TBCA_RAT	Tubulin-specific chaperone A OS=Rattus norvegicus OX=10116 GN=Tbca PE=1 SV=1	0.00230875	0.00214127	0.00191253	0.000247703	0.000521967	1.15e-06	0.000595998	-3.04514	13	0.0707862
sp|Q6AYR8|SCRN2_RAT	Secernin-2 OS=Rattus norvegicus OX=10116 GN=Scrn2 PE=2 SV=1	1.19469e-06	1.92202e-06	1.26969e-06	0.00018973	0.000199902	0.000273322	0.0011317	7.23973	14	0.12481
sp|P21575|DYN1_RAT	Dynamin-1 OS=Rattus norvegicus OX=10116 GN=Dnm1 PE=1 SV=2	1.19469e-06	1.92202e-06	1.26969e-06	9.28885e-05	6.52459e-05	6.69068e-05	0.00119666	5.68101	15	0.123177
sp|P47853|PGS1_RAT	Biglycan OS=Rattus norvegicus OX=10116 GN=Bgn PE=1 SV=1	1.19469e-06	0.000156678	7.99664e-05	0.000507489	0.000534698	0.00062664	0.00115827	2.81077	16	0.111773
sp|P07314|GGT1_RAT	Glutathione hydrolase 1 proenzyme OS=Rattus norvegicus OX=10116 GN=Ggt1 PE=1 SV=4	0.000877974	0.000916072	0.0008312	0.000423886	0.000446613	0.000559756	0.00121301	-0.876181	17	0.110169
sp|Q5FWY5|AIP_RAT	AH receptor-interacting protein OS=Rattus norvegicus OX=10116 GN=Aip PE=1 SV=1	0.000839545	0.000788377	0.000715335	0.000324265	0.000341651	0.000437936	0.00121436	-1.08597	18	0.104165
sp|P70470|LYPA1_RAT	Acyl-protein thioesterase 1 OS=Rattus norvegicus OX=10116 GN=Lypla1 PE=1 SV=1	0.000120456	1.92202e-06	1.26969e-06	0.00046525	0.000612744	0.000502674	0.00121903	3.67622	19	0.0990625
sp|Q5XID1|CPIN1_RAT	Anamorsin OS=Rattus norvegicus OX=10116 GN=Ciapin1 PE=1 SV=1	0.00026898	0.000187101	0.000286481	1.18424e-06	1.53311e-06	1.15e-06	0.00129962	-7.58503	20	0.100331
sp|Q9Z0J5|TRXR2_RAT	Thioredoxin reductase 2, mitochondrial OS=Rattus norvegicus OX=10116 GN=Txnrd2 PE=1 SV=3	0.00100075	0.00104417	0.00117806	0.000508591	0.000428688	0.000604451	0.00160336	-1.06385	21	0.117885
sp|P04906|GSTP1_RAT	Glutathione S-transferase P OS=Rattus norvegicus OX=10116 GN=Gstp1 PE=1 SV=2	0.000791571	0.000550612	0.000702562	0.00242041	0.00187908	0.00192692	0.00172284	1.60648	22	0.120912
sp|Q63270|ACOC_RAT	Cytoplasmic aconitate hydratase OS=Rattus norvegicus OX=10116 GN=Aco1 PE=1 SV=1	0.000280478	0.000292648	0.000265535	0.000782395	0.000697522	0.000942867	0.00187517	1.53051	23	0.125881
sp|Q99PF5|FUBP2_RAT	Far upstream element-binding protein 2 OS=Rattus norvegicus OX=10116 GN=Khsrp PE=1 SV=1	0.000230555	0.000240559	0.000286481	1.18424e-06	7.81865e-05	1.15e-06	0.00187149	-3.23399	24	0.120399
sp|Q9Z327|SYNPO_RAT	Synaptopodin OS=Rattus norvegicus OX=10116 GN=Synpo PE=1 SV=2	5.95166e-05	9.31487e-05	9.50835e-05	1.18424e-06	1.53311e-06	1.15e-06	0.00214575	-6.00139	25	0.132521
sp|P69897|TBB5_RAT	Tubulin beta-5 chain OS=Rattus norvegicus OX=10116 GN=Tubb5 PE=1 SV=1	0.00255834	0.00286467	0.0027248	0.00210882	0.00203144	0.00201805	0.00204093	-0.403877	26	0.1212
sp|P50475|SYAC_RAT	Alanine--tRNA ligase, cytoplasmic OS=Rattus norvegicus OX=10116 GN=Aars1 PE=1 SV=3	1.19469e-06	1.92202e-06	1.26969e-06	0.000193454	0.00014559	0.000119437	0.0022107	6.70768	27	0.126419
sp|A0JPM9|EIF3J_RAT	Eukaryotic translation initiation factor 3 subunit J OS=Rattus norvegicus OX=10116 GN=Eif3j PE=1 SV=1	0.000534845	0.000558053	0.000341787	1.18424e-06	1.53311e-06	1.15e-06	0.00224256	-8.53517	28	0.123661
sp|Q32PX7|FUBP1_RAT	Far upstream element-binding protein 1 OS=Rattus norvegicus OX=10116 GN=Fubp1 PE=1 SV=1	0.000606995	0.000588095	0.000554133	0.000334922	0.000220549	0.000180931	0.00227115	-1.24815	29	0.120919
sp|Q9JHY1|JAM1_RAT	Junctional adhesion molecule A OS=Rattus norvegicus OX=10116 GN=F11r PE=1 SV=1	0.0001847	0.000289071	0.000196717	1.18424e-06	1.53311e-06	1.15e-06	0.00252606	-7.43772	30	0.130008
sp|O88382|MAGI2_RAT	Membrane-associated guanylate kinase, WW and PDZ domain-containing protein 2 OS=Rattus norvegicus OX=10116 GN=Magi2 PE=1 SV=1	4.33907e-05	6.79103e-05	4.62139e-05	1.18424e-06	1.53311e-06	1.15e-06	0.00271323	-5.348	31	0.135136
sp|P24049|RL17_RAT	60S ribosomal protein L17 OS=Rattus norvegicus OX=10116 GN=Rpl17 PE=2 SV=3	1.19469e-06	1.92202e-06	1.26969e-06	0.000436172	0.00076593	0.000628342	0.0031233	8.70494	32	0.150699
sp|Q9JJ19|NHRF1_RAT	Na(+)/H(+) exchange regulatory cofactor NHE-RF1 OS=Rattus norvegicus OX=10116 GN=Slc9a3r1 PE=1 SV=3	0.00599237	0.00560279	0.00513896	0.00353185	0.00395874	0.00389714	0.00313836	-0.555313	33	0.146837
sp|P35171|CX7A2_RAT	Cytochrome c oxidase subunit 7A2, mitochondrial OS=Rattus norvegicus OX=10116 GN=Cox7a2 PE=1 SV=1	0.00066759	0.000696558	0.00106654	1.18424e-06	1.53311e-06	1.15e-06	0.0032468	-9.2958	34	0.147443
sp|P32038|CFAD_RAT	Complement factor D OS=Rattus norvegicus OX=10116 GN=Cfd PE=1 SV=2	0.000210684	0.000439652	0.000560981	0.00101718	0.00107172	0.001099	0.00334858	1.39603	35	0.14772
sp|Q9WVC0|SEPT7_RAT	Septin-7 OS=Rattus norvegicus OX=10116 GN=Septin7 PE=1 SV=1	1.19469e-06	1.92202e-06	1.26969e-06	0.000184073	0.000258589	0.000331465	0.00381198	7.46339	36	0.163492
sp|Q66HF1|NDUS1_RAT	NADH-ubiquinone oxidoreductase 75 kDa subunit, mitochondrial OS=Rattus norvegicus OX=10116 GN=Ndufs1 PE=1 SV=1	0.00121948	0.00123263	0.00121764	0.00136151	0.00143451	0.00135176	0.00387018	0.176659	37	0.161501
sp|Q63150|DPYS_RAT	Dihydropyrimidinase OS=Rattus norvegicus OX=10116 GN=Dpys PE=1 SV=2	0.000160144	0.000278489	0.000341128	0.000566996	0.000651705	0.000612604	0.00388701	1.23177	38	0.157935
sp|Q6GMN2|BAIP2_RAT	Brain-specific angiogenesis inhibitor 1-associated protein 2 OS=Rattus norvegicus OX=10116 GN=Baiap2 PE=1 SV=1	0.000155355	0.00027016	0.000275772	1.18424e-06	1.53311e-06	1.15e-06	0.00406604	-7.50252	39	0.160974
sp|P15651|ACADS_RAT	Short-chain specific acyl-CoA dehydrogenase, mitochondrial OS=Rattus norvegicus OX=10116 GN=Acads PE=1 SV=2	0.00282429	0.00294685	0.00336616	0.00214275	0.00198398	0.00196433	0.00425317	-0.585073	40	0.164172
sp|P48500|TPIS_RAT	Triosephosphate isomerase OS=Rattus norvegicus OX=10116 GN=Tpi1 PE=1 SV=2	0.00267036	0.00267014	0.00213308	0.00376031	0.00350913	0.00359846	0.00427129	0.540202	41	0.160851
sp|Q9Z2Y0|KEG1_RAT	Glycine N-acyltransferase-like protein Keg1 OS=Rattus norvegicus OX=10116 GN=Keg1 PE=1 SV=2	1.19469e-06	1.92202e-06	1.26969e-06	0.000362738	0.00028664	0.000195958	0.00435394	7.59034	42	0.160059
sp|P00884|ALDOB_RAT	Fructose-bisphosphate aldolase B OS=Rattus norvegicus OX=10116 GN=Aldob PE=1 SV=2	0.00266394	0.0020648	0.00194556	0.00360122	0.0040266	0.00428792	0.00428115	0.836182	43	0.153723
sp|P42123|LDHB_RAT	L-lactate dehydrogenase B chain OS=Rattus norvegicus OX=10116 GN=Ldhb PE=1 SV=2	0.000580643	0.00051929	0.00044173	0.000800955	0.000759509	0.000865382	0.00433881	0.654	44	0.152253
sp|P02761|MUP_RAT	Major urinary protein OS=Rattus norvegicus OX=10116 PE=1 SV=1	0.0247967	0.0182067	0.038311	0.062963	0.0601099	0.0694648	0.00475645	1.24356	45	0.163199
sp|Q91V33|KHDR1_RAT	KH domain-containing, RNA-binding, signal transduction-associated protein 1 OS=Rattus norvegicus OX=10116 GN=Khdrbs1 PE=1 SV=1	1.19469e-06	1.92202e-06	1.26969e-06	0.000241552	0.000127252	0.000195736	0.00492181	7.00789	46	0.165202
sp|P97524|S27A2_RAT	Very long-chain acyl-CoA synthetase OS=Rattus norvegicus OX=10116 GN=Slc27a2 PE=1 SV=1	8.93709e-05	4.66244e-05	4.75929e-05	0.000215741	0.00027277	0.000186476	0.00483408	1.87839	47	0.158805
sp|P51886|LUM_RAT	Lumican OS=Rattus norvegicus OX=10116 GN=Lum PE=1 SV=1	0.00114754	0.00136839	0.00113491	0.000712329	0.000583738	0.000769627	0.00485578	-0.821601	48	0.156194
sp|Q62638|GSLG1_RAT	Golgi apparatus protein 1 OS=Rattus norvegicus OX=10116 GN=Glg1 PE=1 SV=1	2.36592e-05	1.92202e-06	1.26969e-06	0.000205608	0.000361053	0.00024683	0.00508852	4.92108	49	0.16034
sp|Q3T1J1|IF5A1_RAT	Eukaryotic translation initiation factor 5A-1 OS=Rattus norvegicus OX=10116 GN=Eif5a PE=1 SV=3	0.00287844	0.00281563	0.00268251	0.00243199	0.00237936	0.00225224	0.00510355	-0.24596	50	0.157598
sp|Q66HR2|MARE1_RAT	Microtubule-associated protein RP/EB family member 1 OS=Rattus norvegicus OX=10116 GN=Mapre1 PE=1 SV=3	0.000827014	0.0008629	0.000990926	0.000299462	0.00042069	0.000539249	0.00512886	-1.08995	51	0.155274
sp|P34058|HS90B_RAT	Heat shock protein HSP 90-beta OS=Rattus norvegicus OX=10116 GN=Hsp90ab1 PE=1 SV=4	0.000650531	0.000598905	0.000570589	0.000812903	0.000856488	0.000758524	0.00528087	0.41576	52	0.156801
sp|Q8CHM7|HACL1_RAT	2-hydroxyacyl-CoA lyase 1 OS=Rattus norvegicus OX=10116 GN=Hacl1 PE=1 SV=1	4.7685e-05	4.97541e-05	5.07876e-05	0.000138134	0.00014554	9.94966e-05	0.00541576	1.37018	53	0.157772
sp|Q02874|H2AY_RAT	Core histone macro-H2A.1 OS=Rattus norvegicus OX=10116 GN=Macroh2a1 PE=1 SV=4	7.46765e-05	1.92202e-06	0.000159071	0.000360538	0.000379868	0.000311631	0.00543104	2.15835	54	0.155288
sp|Q9JKL7|SREK1_RAT	Splicing regulatory glutamine/lysine-rich protein 1 OS=Rattus norvegicus OX=10116 GN=Srek1 PE=1 SV=1	0.000168249	0.000175549	0.000119464	5.41536e-05	1.53311e-06	1.15e-06	0.00553765	-3.02693	55	0.155457
sp|Q9WU49|CHSP1_RAT	Calcium-regulated heat stable protein 1 OS=Rattus norvegicus OX=10116 GN=Carhsp1 PE=1 SV=1	0.000376938	0.000393295	0.000401464	0.000181986	1.53311e-06	1.15e-06	0.00559777	-2.66559	56	0.154339
sp|P62907|RL10A_RAT	60S ribosomal protein L10a OS=Rattus norvegicus OX=10116 GN=Rpl10a PE=1 SV=2	1.19469e-06	1.92202e-06	1.26969e-06	0.000493123	0.000649452	0.000932379	0.00581044	8.88583	57	0.157392
sp|P20070|NB5R3_RAT	NADH-cytochrome b5 reductase 3 OS=Rattus norvegicus OX=10116 GN=Cyb5r3 PE=1 SV=2	0.000184086	0.000192074	0.000294096	0.000711014	0.000936419	0.00115231	0.00581474	2.06251	58	0.154792
sp|P12785|FAS_RAT	Fatty acid synthase OS=Rattus norvegicus OX=10116 GN=Fasn PE=1 SV=3	1.19469e-06	1.92202e-06	1.26969e-06	2.13588e-05	2.2504e-05	1.15384e-05	0.00818614	3.65881	59	0.214227
sp|Q497B0|NIT2_RAT	Omega-amidase NIT2 OS=Rattus norvegicus OX=10116 GN=Nit2 PE=1 SV=1	0.000903423	0.0011521	0.00106912	0.00174469	0.00163398	0.00146613	0.00627054	0.632751	60	0.161362
sp|Q91ZS3|CAB45_RAT	45 kDa calcium-binding protein OS=Rattus norvegicus OX=10116 GN=Sdf4 PE=1 SV=1	0.00015349	0.00016015	8.17385e-05	1.18424e-06	1.53311e-06	1.15e-06	0.00652023	-6.67575	61	0.165037
sp|Q5BJK8|GOLI4_RAT	Golgi integral membrane protein 4 OS=Rattus norvegicus OX=10116 GN=Golim4 PE=1 SV=2	0.000127282	0.000177073	9.03755e-05	1.18424e-06	1.53311e-06	1.15e-06	0.00657605	-6.67338	62	0.163765
sp|Q8K4V4|SNX27_RAT	Sorting nexin-27 OS=Rattus norvegicus OX=10116 GN=Snx27 PE=1 SV=2	0.000154202	0.000214524	0.00010949	1.18424e-06	1.53311e-06	1.15e-06	0.0065356	-6.95018	63	0.160174
sp|Q8R424|STABP_RAT	STAM-binding protein OS=Rattus norvegicus OX=10116 GN=Stambp PE=2 SV=1	0.000653419	0.000477241	0.000556747	0.000315471	0.000265908	0.000272677	0.00644224	-0.982406	64	0.155419
sp|P04638|APOA2_RAT	Apolipoprotein A-II OS=Rattus norvegicus OX=10116 GN=Apoa2 PE=2 SV=1	0.000543235	0.000283403	0.00057858	1.18424e-06	1.53311e-06	1.15e-06	0.00738852	-8.50523	65	0.175506
sp|Q2V057|HYPDH_RAT	Hydroxyproline dehydrogenase OS=Rattus norvegicus OX=10116 GN=Prodh2 PE=2 SV=1	1.19469e-06	1.92202e-06	1.26969e-06	0.000117333	6.18119e-05	0.000126771	0.00770777	6.12395	66	0.180315
sp|Q62760|TOM20_RAT	Mitochondrial import receptor subunit TOM20 homolog OS=Rattus norvegicus OX=10116 GN=Tomm20 PE=1 SV=2	1.19469e-06	1.92202e-06	1.26969e-06	0.000368992	0.000194388	0.000398672	0.00744189	7.77693	67	0.171497
sp|Q03346|MPPB_RAT	Mitochondrial-processing peptidase subunit beta OS=Rattus norvegicus OX=10116 GN=Pmpcb PE=1 SV=3	5.66564e-05	1.92202e-06	1.26969e-06	0.000164122	0.000115281	0.000177324	0.00735625	2.93195	68	0.16703
sp|F1MAD2|INADL_RAT	InaD-like protein OS=Rattus norvegicus OX=10116 GN=Patj PE=1 SV=2	0.000120719	0.000125957	0.000112502	2.91415e-05	6.14079e-05	1.15e-06	0.00750919	-1.96971	69	0.168032
sp|O35567|PUR9_RAT	Bifunctional purine biosynthesis protein ATIC OS=Rattus norvegicus OX=10116 GN=Atic PE=1 SV=2	1.19469e-06	4.88296e-05	1.26969e-06	0.000316323	0.000190447	0.000195296	0.00795168	3.77474	70	0.175391
sp|Q4V898|RBMX_RAT	RNA-binding motif protein, X chromosome OS=Rattus norvegicus OX=10116 GN=Rbmx PE=1 SV=1	0.000497269	0.000444725	0.000453963	0.000274378	7.22724e-05	0.000148224	0.00796411	-1.49612	71	0.173191
sp|P07483|FABPH_RAT	Fatty acid-binding protein, heart OS=Rattus norvegicus OX=10116 GN=Fabp3 PE=1 SV=2	0.00291631	0.00347755	0.0028842	0.00221256	0.00190734	0.00173857	0.00863815	-0.663299	72	0.18524
sp|Q5U301|AKAP2_RAT	A-kinase anchor protein 2 OS=Rattus norvegicus OX=10116 GN=Akap2 PE=1 SV=1	0.000350293	0.000299039	0.000542668	6.14986e-05	1.53311e-06	3.32227e-05	0.00867229	-3.63039	73	0.183425
sp|Q498D9|GIPC2_RAT	PDZ domain-containing protein GIPC2 OS=Rattus norvegicus OX=10116 GN=Gipc2 PE=2 SV=1	0.000705859	0.000644427	0.000469866	0.000255591	0.000269295	0.000276151	0.00872217	-1.18412	74	0.181987
sp|O35115|FHL2_RAT	Four and a half LIM domains protein 2 OS=Rattus norvegicus OX=10116 GN=Fhl2 PE=1 SV=1	0.00129091	0.00124332	0.00137491	0.00076708	0.000909233	0.000517988	0.00904882	-0.833088	75	0.186285
sp|O35763|MOES_RAT	Moesin OS=Rattus norvegicus OX=10116 GN=Msn PE=1 SV=3	0.00254482	0.00230456	0.00235242	0.00153	0.00195398	0.00165307	0.00916209	-0.487415	76	0.186135
sp|Q6AXM7|HBS1L_RAT	HBS1-like protein OS=Rattus norvegicus OX=10116 GN=Hbs1l PE=1 SV=1	4.08026e-05	8.51462e-05	8.69148e-05	1.18424e-06	1.53311e-06	1.15e-06	0.00989478	-5.78244	77	0.19841
sp|Q62733|LAP2_RAT	Lamina-associated polypeptide 2, isoform beta OS=Rattus norvegicus OX=10116 GN=Tmpo PE=1 SV=3	0.000306471	0.000255815	0.000391694	5.91856e-05	0.000124718	0.000127893	0.0092992	-1.61336	78	0.184076
sp|P58775|TPM2_RAT	Tropomyosin beta chain OS=Rattus norvegicus OX=10116 GN=Tpm2 PE=1 SV=1	0.000292658	0.000203571	0.0002078	9.41968e-05	9.92473e-05	0.000101774	0.00942991	-1.25386	79	0.184301
sp|P52555|ERP29_RAT	Endoplasmic reticulum resident protein 29 OS=Rattus norvegicus OX=10116 GN=Erp29 PE=1 SV=2	0.00117213	0.00133418	0.0012484	0.00102892	0.000975677	0.000889346	0.00982572	-0.375664	80	0.189636
sp|Q9Z0W7|CLIC4_RAT	Chloride intracellular channel protein 4 OS=Rattus norvegicus OX=10116 GN=Clic4 PE=1 SV=3	0.00109506	0.00102832	0.000816415	0.00169182	0.00211675	0.00159942	0.0102715	0.879379	81	0.195792
sp|P39052|DYN2_RAT	Dynamin-2 OS=Rattus norvegicus OX=10116 GN=Dnm2 PE=1 SV=1	1.19469e-06	1.92202e-06	1.26969e-06	0.000122997	9.71939e-05	0.000199336	0.0107198	6.57958	82	0.201846
sp|Q641Y8|DDX1_RAT	ATP-dependent RNA helicase DDX1 OS=Rattus norvegicus OX=10116 GN=Ddx1 PE=1 SV=1	0.000187196	0.000156255	1.26969e-06	0.000361512	0.000457074	0.000507769	0.0103304	1.94397	83	0.19217
sp|P13437|THIM_RAT	3-ketoacyl-CoA thiolase, mitochondrial OS=Rattus norvegicus OX=10116 GN=Acaa2 PE=1 SV=1	0.00209357	0.00167472	0.00170951	0.00262802	0.00248493	0.00240258	0.0104667	0.456278	84	0.192388
sp|P26284|ODPA_RAT	Pyruvate dehydrogenase E1 component subunit alpha, somatic form, mitochondrial OS=Rattus norvegicus OX=10116 GN=Pdha1 PE=1 SV=2	0.00142077	0.00118593	0.00128623	0.00192065	0.00195135	0.0024457	0.0115898	0.698544	85	0.210525
sp|Q9JJP9|UBQL1_RAT	Ubiquilin-1 OS=Rattus norvegicus OX=10116 GN=Ubqln1 PE=1 SV=1	0.00061884	0.000695361	0.000861905	0.000413689	0.00029058	0.000397302	0.0117262	-0.982186	86	0.210526
sp|P19234|NDUV2_RAT	NADH dehydrogenase [ubiquinone] flavoprotein 2, mitochondrial OS=Rattus norvegicus OX=10116 GN=Ndufv2 PE=1 SV=2	0.00592082	0.00512869	0.00511623	0.00431482	0.00409155	0.00384606	0.0119811	-0.399871	87	0.21263
sp|Q794F9|4F2_RAT	4F2 cell-surface antigen heavy chain OS=Rattus norvegicus OX=10116 GN=Slc3a2 PE=1 SV=1	0.000315427	0.000329114	0.000391941	0.000253813	0.000213937	0.000219383	0.0119885	-0.593032	88	0.210344
sp|P15429|ENOB_RAT	Beta-enolase OS=Rattus norvegicus OX=10116 GN=Eno3 PE=1 SV=3	0.000574527	0.000466244	0.000475929	0.00117117	0.00110407	0.000799182	0.0122304	1.01938	89	0.212177
sp|A7VJC2|ROA2_RAT	Heterogeneous nuclear ribonucleoproteins A2/B1 OS=Rattus norvegicus OX=10116 GN=Hnrnpa2b1 PE=1 SV=1	0.000941812	0.000982679	0.0009195	0.00068206	0.000479086	0.000327521	0.0123583	-0.933896	90	0.212013
sp|P29411|KAD3_RAT	GTP:AMP phosphotransferase AK3, mitochondrial OS=Rattus norvegicus OX=10116 GN=Ak3 PE=2 SV=2	0.00109843	0.00089141	0.00103991	0.0014142	0.00173836	0.00190994	0.0127262	0.740645	91	0.215926
sp|P58200|VTI1B_RAT	Vesicle transport through interaction with t-SNAREs homolog 1B OS=Rattus norvegicus OX=10116 GN=Vti1b PE=1 SV=2	0.000358254	0.0002492	0.000381564	1.18424e-06	0.000121492	0.000124585	0.0127015	-1.99996	92	0.213164
sp|Q6AY56|TBA8_RAT	Tubulin alpha-8 chain OS=Rattus norvegicus OX=10116 GN=Tuba8 PE=2 SV=1	0.000678741	0.000772574	0.000722903	0.000476649	0.00056498	0.000386242	0.0129657	-0.606632	93	0.215258
sp|Q3MID3|ARFG2_RAT	ADP-ribosylation factor GTPase-activating protein 2 OS=Rattus norvegicus OX=10116 GN=Arfgap2 PE=1 SV=1	0.000213115	0.000389135	0.000397218	1.18424e-06	0.000108409	1.15e-06	0.0132827	-3.17395	94	0.218176
sp|P82450|SIAE_RAT	Sialate O-acetylesterase OS=Rattus norvegicus OX=10116 GN=Siae PE=1 SV=2	0.000408929	0.000480008	0.00054442	0.000296147	0.000260021	0.000159984	0.0133368	-1.00106	95	0.216758
sp|O88797|DAB2_RAT	Disabled homolog 2 OS=Rattus norvegicus OX=10116 GN=Dab2 PE=1 SV=1	0.000396816	0.000526953	0.000384213	0.000208999	0.000183504	0.000263446	0.0133476	-0.995688	96	0.214674
sp|P84060|DTNB_RAT	Dystrobrevin beta OS=Rattus norvegicus OX=10116 GN=Dtnb PE=1 SV=2	8.47247e-05	0.000132602	9.02373e-05	1.18424e-06	4.30982e-05	1.15e-06	0.0132327	-2.75909	97	0.210632
sp|Q62930|CO9_RAT	Complement component C9 OS=Rattus norvegicus OX=10116 GN=C9 PE=1 SV=1	0.000150027	0.000156537	0.000266314	0.000386309	0.000610532	0.000521728	0.01386	1.40641	98	0.218366
sp|Q923W4|HDGR3_RAT	Hepatoma-derived growth factor-related protein 3 OS=Rattus norvegicus OX=10116 GN=Hdgfl3 PE=1 SV=1	0.00082292	0.000715523	0.00102254	0.00026487	0.000418607	1.15e-06	0.0145102	-1.90331	99	0.2263
sp|P49432|ODPB_RAT	Pyruvate dehydrogenase E1 component subunit beta, mitochondrial OS=Rattus norvegicus OX=10116 GN=Pdhb PE=1 SV=2	0.00100324	0.000724692	0.000986326	0.00134132	0.00164878	0.0013687	0.0147199	0.683371	100	0.227276
sp|P36506|MP2K2_RAT	Dual specificity mitogen-activated protein kinase kinase 2 OS=Rattus norvegicus OX=10116 GN=Map2k2 PE=1 SV=1	1.19469e-06	1.92202e-06	1.26969e-06	0.000334399	0.000140931	0.000216778	0.0151846	7.30182	101	0.23213
sp|P06866|HPT_RAT	Haptoglobin OS=Rattus norvegicus OX=10116 GN=Hp PE=1 SV=3	0.000878256	0.000749753	0.000850363	0.00107933	0.00138088	0.00141603	0.0149033	0.645267	102	0.225595
sp|Q63279|K1C19_RAT	Keratin, type I cytoskeletal 19 OS=Rattus norvegicus OX=10116 GN=Krt19 PE=1 SV=2	0.0020624	0.00129114	0.00102508	0.000132764	6.9941e-05	0.000286886	0.0150887	-3.16083	103	0.226183
sp|Q5XI78|ODO1_RAT	2-oxoglutarate dehydrogenase, mitochondrial OS=Rattus norvegicus OX=10116 GN=Ogdh PE=1 SV=1	0.000758298	0.000734688	0.000836481	0.000941416	0.00101944	0.00113016	0.01558	0.408081	104	0.231303
sp|P10247|HG2A_RAT	H-2 class II histocompatibility antigen gamma chain OS=Rattus norvegicus OX=10116 GN=Cd74 PE=1 SV=2	1.19469e-06	1.92202e-06	0.000105384	0.00038217	0.00020133	0.000412911	0.01652	3.19903	105	0.242922
sp|P50123|AMPE_RAT	Glutamyl aminopeptidase OS=Rattus norvegicus OX=10116 GN=Enpep PE=1 SV=2	0.000381127	0.000489433	0.000437149	0.000311398	0.00017896	0.000183516	0.0168283	-0.956491	106	0.245121
sp|O08816|WASL_RAT	Neural Wiskott-Aldrich syndrome protein OS=Rattus norvegicus OX=10116 GN=Wasl PE=1 SV=2	5.52993e-05	0.000115398	5.88974e-05	1.18424e-06	1.53311e-06	1.15e-06	0.0180508	-5.8916	107	0.260471
sp|Q63159|COQ3_RAT	Ubiquinone biosynthesis O-methyltransferase, mitochondrial OS=Rattus norvegicus OX=10116 GN=Coq3 PE=2 SV=2	1.19469e-06	1.92202e-06	1.26969e-06	7.75417e-05	0.000163398	8.3779e-05	0.0180965	6.21001	108	0.258713
sp|P00388|NCPR_RAT	NADPH--cytochrome P450 reductase OS=Rattus norvegicus OX=10116 GN=Por PE=1 SV=3	1.19469e-06	1.92202e-06	1.26969e-06	3.94571e-05	8.31452e-05	4.26309e-05	0.0189101	5.23532	109	0.267864
sp|Q5U206|CALL3_RAT	Calmodulin-like protein 3 OS=Rattus norvegicus OX=10116 GN=Calml3 PE=2 SV=1	0.00204533	0.00232809	0.00257449	0.0012568	0.00151335	0.00174586	0.0176186	-0.621528	110	0.2473
sp|P24090|FETUA_RAT	Alpha-2-HS-glycoprotein OS=Rattus norvegicus OX=10116 GN=Ahsg PE=1 SV=2	0.00133802	0.00156033	0.00108977	0.000835997	0.000800745	0.000739016	0.017974	-0.747321	111	0.250017
sp|P14562|LAMP1_RAT	Lysosome-associated membrane glycoprotein 1 OS=Rattus norvegicus OX=10116 GN=Lamp1 PE=1 SV=1	0.000680712	0.000639224	0.000725002	0.000525836	0.000346268	0.000284066	0.0180281	-0.822703	112	0.24853
sp|Q5XIM9|TCPB_RAT	T-complex protein 1 subunit beta OS=Rattus norvegicus OX=10116 GN=Cct2 PE=1 SV=3	0.00031071	0.000324192	0.000110309	0.00070005	0.000526845	0.000540257	0.0184918	1.24571	113	0.252667
sp|P17136|RSMB_RAT,sp|P63164|RSMN_RAT	Small nuclear ribonucleoprotein-associated protein B OS=Rattus norvegicus OX=10116 GN=Snrpb PE=2 SV=2,Small nuclear ribonucleoprotein-associated protein N OS=Rattus norvegicus OX=10116 GN=Snrpn PE=2 SV=1	0.000599675	0.000625696	0.000510954	0.000463236	0.000366055	0.000375373	0.0189565	-0.527405	114	0.256744
sp|O88600|HSP74_RAT	Heat shock 70 kDa protein 4 OS=Rattus norvegicus OX=10116 GN=Hspa4 PE=1 SV=1	0.000692624	0.000825919	0.000772818	0.00063695	0.000570436	0.000584957	0.0189826	-0.354358	115	0.254863
sp|Q5XIW8|SNUT1_RAT	U4/U6.U5 tri-snRNP-associated protein 1 OS=Rattus norvegicus OX=10116 GN=Sart1 PE=1 SV=1	6.87468e-05	7.17299e-05	0.00014644	1.18424e-06	1.53311e-06	1.15e-06	0.0206123	-6.21314	116	0.274357
sp|Q64565|AGT2_RAT	Alanine--glyoxylate aminotransferase 2, mitochondrial OS=Rattus norvegicus OX=10116 GN=Agxt2 PE=1 SV=2	0.000811669	0.000959808	0.00138317	0.00193324	0.00165154	0.00220165	0.01984	0.875197	117	0.26182
sp|P63090|PTN_RAT	Pleiotrophin OS=Rattus norvegicus OX=10116 GN=Ptn PE=1 SV=1	0.000659642	0.000516199	0.000878202	1.18424e-06	0.00033555	1.15e-06	0.0202687	-2.60386	118	0.265211
sp|P07861|NEP_RAT	Neprilysin OS=Rattus norvegicus OX=10116 GN=Mme PE=1 SV=2	0.0003694	0.0005396	0.000472121	0.000249684	7.51633e-05	0.00023123	0.0207622	-1.31248	119	0.269385
sp|Q9JIL3|ILF3_RAT	Interleukin enhancer-binding factor 3 OS=Rattus norvegicus OX=10116 GN=Ilf3 PE=1 SV=2	9.26588e-05	0.000128906	0.000164479	0.000298237	0.000219959	0.00035445	0.0213446	1.17663	120	0.274634
sp|Q923K9|A1CF_RAT	APOBEC1 complementation factor OS=Rattus norvegicus OX=10116 GN=A1cf PE=1 SV=1	0.000139924	9.73305e-05	4.96761e-05	1.18424e-06	1.53311e-06	1.15e-06	0.0223614	-6.21321	121	0.285339
sp|Q3T1K5|CAZA2_RAT	F-actin-capping protein subunit alpha-2 OS=Rattus norvegicus OX=10116 GN=Capza2 PE=1 SV=1	9.68705e-05	0.000202148	0.00030952	0.000748305	0.000492766	0.00050531	0.0214069	1.52095	122	0.27092
sp|Q63525|NUDC_RAT	Nuclear migration protein nudC OS=Rattus norvegicus OX=10116 GN=Nudc PE=1 SV=1	0.000250346	8.70697e-05	0.000177757	1.18424e-06	1.53311e-06	1.15e-06	0.022585	-7.05757	123	0.283505
sp|Q08420|SODE_RAT	Extracellular superoxide dismutase [Cu-Zn] OS=Rattus norvegicus OX=10116 GN=Sod3 PE=1 SV=2	0.00068127	0.000236944	0.000483731	1.18424e-06	1.53311e-06	1.15e-06	0.0222413	-8.50187	124	0.27694
sp|P06399|FIBA_RAT	Fibrinogen alpha chain OS=Rattus norvegicus OX=10116 GN=Fga PE=1 SV=3	0.000566854	0.000554485	0.000603736	0.000410515	0.000252306	0.000110884	0.0225161	-1.1568	125	0.278119
sp|P17074|RS19_RAT	40S ribosomal protein S19 OS=Rattus norvegicus OX=10116 GN=Rps19 PE=2 SV=3	0.000382138	0.000398719	0.000610502	0.00129147	0.000777551	0.00119602	0.0230173	1.23061	126	0.282053
sp|Q9WU82|CTNB1_RAT	Catenin beta-1 OS=Rattus norvegicus OX=10116 GN=Ctnnb1 PE=1 SV=1	7.09474e-05	7.4026e-05	7.55636e-05	0.00010276	0.00014436	0.000111026	0.0230191	0.699526	127	0.279854
sp|Q9ER34|ACON_RAT	Aconitate hydratase, mitochondrial OS=Rattus norvegicus OX=10116 GN=Aco2 PE=1 SV=2	0.00213115	0.00181596	0.00208066	0.00236651	0.00274635	0.00289038	0.0233157	0.408958	128	0.281245
sp|P04904|GSTA3_RAT	Glutathione S-transferase alpha-3 OS=Rattus norvegicus OX=10116 GN=Gsta3 PE=1 SV=3	0.00100289	0.00130802	0.000801111	0.00181574	0.00229571	0.00300808	0.023822	1.19393	129	0.285125
sp|P05765|RS21_RAT	40S ribosomal protein S21 OS=Rattus norvegicus OX=10116 GN=Rps21 PE=1 SV=1	0.00233656	0.00208967	0.00142205	0.000966936	0.000679186	1.15e-06	0.0240356	-1.82794	130	0.285469
sp|Q03191|TFF3_RAT	Trefoil factor 3 OS=Rattus norvegicus OX=10116 GN=Tff3 PE=1 SV=1	0.00102611	0.000356878	0.00109287	1.18424e-06	1.53311e-06	1.15e-06	0.0247516	-9.32237	131	0.291729
sp|P04905|GSTM1_RAT	Glutathione S-transferase Mu 1 OS=Rattus norvegicus OX=10116 GN=Gstm1 PE=1 SV=2	1.19469e-06	1.92202e-06	1.26969e-06	0.000368145	0.000129295	0.000397758	0.0250308	7.67303	132	0.292784
sp|P38918|ARK73_RAT	Aflatoxin B1 aldehyde reductase member 3 OS=Rattus norvegicus OX=10116 GN=Akr7a3 PE=1 SV=2	0.000169449	0.000265203	0.000451186	0.000572671	0.000861964	0.000972298	0.0249953	1.44208	133	0.290171
sp|P15684|AMPN_RAT	Aminopeptidase N OS=Rattus norvegicus OX=10116 GN=Anpep PE=1 SV=2	0.000344518	0.000419378	0.000428089	0.000277222	5.8417e-05	0.000119808	0.0251272	-1.38801	134	0.289525
sp|P23358|RL12_RAT	60S ribosomal protein L12 OS=Rattus norvegicus OX=10116 GN=Rpl12 PE=2 SV=1	0.000167909	0.000175195	0.000178834	0.000648531	0.000512477	0.00105105	0.0252695	2.08344	135	0.289008
sp|B0BN56|RT31_RAT	28S ribosomal protein S31, mitochondrial OS=Rattus norvegicus OX=10116 GN=Mrps31 PE=2 SV=1	0.000143178	0.000224086	7.6247e-05	1.18424e-06	1.53311e-06	1.15e-06	0.0265667	-6.84148	136	0.30161
sp|P37996|ARL3_RAT	ADP-ribosylation factor-like protein 3 OS=Rattus norvegicus OX=10116 GN=Arl3 PE=1 SV=2	0.000456675	0.000476491	0.000486389	1.18424e-06	1.53311e-06	0.000317624	0.0257299	-2.14776	137	0.289978
sp|P20788|UCRI_RAT	Cytochrome b-c1 complex subunit Rieske, mitochondrial OS=Rattus norvegicus OX=10116 GN=Uqcrfs1 PE=1 SV=2	0.00101113	0.00116051	0.00118461	0.000878712	0.000617217	0.000843905	0.0261433	-0.520443	138	0.292502
sp|Q8R491|EHD3_RAT	EH domain-containing protein 3 OS=Rattus norvegicus OX=10116 GN=Ehd3 PE=1 SV=2	0.000258925	0.000486288	0.000496389	0.00070005	0.000737583	0.000648308	0.0262088	0.748495	139	0.291125
sp|Q63228|GMFB_RAT	Glia maturation factor beta OS=Rattus norvegicus OX=10116 GN=Gmfb PE=1 SV=2	0.000195105	0.000610714	0.0004156	1.18424e-06	1.53311e-06	1.15e-06	0.0277684	-8.303	140	0.306246
sp|Q63207|FA10_RAT	Coagulation factor X OS=Rattus norvegicus OX=10116 GN=F10 PE=2 SV=1	5.74792e-05	0.00017992	0.000183657	1.18424e-06	1.53311e-06	1.15e-06	0.0284391	-6.76653	141	0.311418
sp|P43424|GALT_RAT	Galactose-1-phosphate uridylyltransferase OS=Rattus norvegicus OX=10116 GN=Galt PE=2 SV=1	1.19469e-06	1.92202e-06	1.26969e-06	7.05855e-05	0.00022311	0.000152526	0.0287869	6.66858	142	0.313007
sp|P15791|KCC2D_RAT	Calcium/calmodulin-dependent protein kinase type II subunit delta OS=Rattus norvegicus OX=10116 GN=Camk2d PE=1 SV=1	0.000103959	0.00010847	0.000166084	1.18424e-06	5.28822e-05	5.42284e-05	0.0274626	-1.80537	143	0.296519
sp|Q6AYQ8|FAHD1_RAT	Acylpyruvase FAHD1, mitochondrial OS=Rattus norvegicus OX=10116 GN=Fahd1 PE=1 SV=1	0.000501447	0.000523206	0.000801111	0.00121049	0.00165801	0.00104629	0.0280674	1.10044	144	0.300945
sp|Q6IFU8|K1C17_RAT	Keratin, type I cytoskeletal 17 OS=Rattus norvegicus OX=10116 GN=Krt17 PE=1 SV=1	0.000447886	0.000333801	0.000136294	1.18424e-06	1.53311e-06	1.15e-06	0.0286283	-7.89098	145	0.304842
sp|P13264|GLSK_RAT	Glutaminase kidney isoform, mitochondrial OS=Rattus norvegicus OX=10116 GN=Gls PE=1 SV=2	1.19469e-06	1.92202e-06	1.26969e-06	3.96912e-05	0.000125458	0.000128652	0.0296268	6.06566	146	0.313314
sp|Q6AYH5|DCTN2_RAT	Dynactin subunit 2 OS=Rattus norvegicus OX=10116 GN=Dctn2 PE=1 SV=1	0.000758096	0.000575267	0.000660618	0.000332735	0.000490805	0.0002157	0.029154	-0.940123	147	0.306216
sp|Q03555|GEPH_RAT	Gephyrin OS=Rattus norvegicus OX=10116 GN=Gphn PE=1 SV=3	0.000180371	0.000150558	0.000230528	0.0001045	0.000110102	0.000112905	0.02928	-0.777648	148	0.305462
sp|P09034|ASSY_RAT	Argininosuccinate synthase OS=Rattus norvegicus OX=10116 GN=Ass1 PE=1 SV=1	0.00040347	0.000561304	0.000859444	0.000973977	0.00116302	0.00126279	0.0294172	0.898165	149	0.304833
sp|Q5RJR8|LRC59_RAT	Leucine-rich repeat-containing protein 59 OS=Rattus norvegicus OX=10116 GN=Lrrc59 PE=1 SV=1	0.000631709	0.000847441	0.000672811	0.000958537	0.00100993	0.00122394	0.0296526	0.568991	150	0.305224
sp|Q01129|PGS2_RAT	Decorin OS=Rattus norvegicus OX=10116 GN=Dcn PE=1 SV=1	1.19469e-06	1.92202e-06	1.26969e-06	0.000453422	0.000159244	0.000244947	0.0312021	7.61115	151	0.319046
sp|Q62920|PDLI5_RAT	PDZ and LIM domain protein 5 OS=Rattus norvegicus OX=10116 GN=Pdlim5 PE=1 SV=2	0.000187512	0.000293474	0.000249641	9.0531e-05	0.000143077	0.00014672	0.0307663	-0.941892	152	0.312521
sp|P05197|EF2_RAT	Elongation factor 2 OS=Rattus norvegicus OX=10116 GN=Eef2 PE=1 SV=4	0.000387482	0.000404296	0.000412694	0.00049887	0.000591319	0.000707435	0.0313027	0.577691	153	0.315891
sp|G3V9R8|HNRPC_RAT	Heterogeneous nuclear ribonucleoprotein C OS=Rattus norvegicus OX=10116 GN=Hnrnpc PE=1 SV=2	0.000929697	0.000873035	0.00079215	0.0006284	0.000756677	0.000678947	0.0317046	-0.330208	154	0.317869
sp|Q9Z254|GIPC1_RAT	PDZ domain-containing protein GIPC1 OS=Rattus norvegicus OX=10116 GN=Gipc1 PE=1 SV=2	0.000415991	0.000347233	0.000354445	1.18424e-06	8.46433e-05	0.000260394	0.0317712	-1.69072	155	0.316482
sp|P29266|3HIDH_RAT	3-hydroxyisobutyrate dehydrogenase, mitochondrial OS=Rattus norvegicus OX=10116 GN=Hibadh PE=1 SV=3	0.000413507	0.00077661	0.000704659	0.00151727	0.00143035	0.000949078	0.0329686	1.04022	156	0.326305
sp|Q5XIN6|LETM1_RAT	Mitochondrial proton/calcium exchanger protein OS=Rattus norvegicus OX=10116 GN=Letm1 PE=1 SV=1	0.00138712	0.00101703	0.00139752	0.000905003	0.00072468	0.000469344	0.03318	-0.856913	157	0.326306
sp|Q6NYB7|RAB1A_RAT	Ras-related protein Rab-1A OS=Rattus norvegicus OX=10116 GN=Rab1A PE=1 SV=3	0.00202719	0.00197415	0.00129546	0.00260994	0.00247489	0.00310187	0.0335496	0.628162	158	0.327852
sp|Q9WVE9|ITSN1_RAT	Intersectin-1 OS=Rattus norvegicus OX=10116 GN=Itsn1 PE=1 SV=2	0.000129387	6.75006e-05	8.61284e-05	1.18424e-06	4.93629e-05	1.15e-06	0.0340717	-2.45273	159	0.33086
sp|Q7TQ94|NIT1_RAT	Deaminated glutathione amidase OS=Rattus norvegicus OX=10116 GN=Nit1 PE=2 SV=2	0.000847247	0.00114921	0.00099261	0.00130896	0.00129295	0.00123747	0.034353	0.361175	160	0.331507
sp|Q75Q39|TOM70_RAT	Mitochondrial import receptor subunit TOM70 OS=Rattus norvegicus OX=10116 GN=Tomm70 PE=1 SV=1	0.000181672	0.000142166	1.26969e-06	0.000263133	0.000323448	0.000284299	0.0341115	1.42156	161	0.327131
sp|Q7TNY6|GCP60_RAT	Golgi resident protein GCP60 OS=Rattus norvegicus OX=10116 GN=Acbd3 PE=1 SV=3	0.000158013	0.000274783	0.000168294	1.18424e-06	1.53311e-06	0.0001099	0.0351122	-2.41615	162	0.334649
sp|Q5BJP3|UFM1_RAT	Ubiquitin-fold modifier 1 OS=Rattus norvegicus OX=10116 GN=Ufm1 PE=3 SV=1	0.00195564	0.00170042	0.00208289	1.18424e-06	0.00132641	0.000680088	0.0355646	-1.51526	163	0.336882
sp|Q9ERE6|MPRIP_RAT	Myosin phosphatase Rho-interacting protein OS=Rattus norvegicus OX=10116 GN=Mprip PE=1 SV=1	0.000430787	0.000421387	0.000372788	0.000363971	0.000328702	0.00033707	0.0356756	-0.250451	164	0.335873
sp|D3ZHV2|MACF1_RAT	Microtubule-actin cross-linking factor 1 OS=Rattus norvegicus OX=10116 GN=Macf1 PE=1 SV=1	0.000132657	0.000127766	8.69468e-05	6.89736e-05	4.67175e-05	1.15e-06	0.0356866	-1.57193	165	0.33394
sp|Q99MZ8|LASP1_RAT	LIM and SH3 domain protein 1 OS=Rattus norvegicus OX=10116 GN=Lasp1 PE=1 SV=1	0.000210684	0.000549566	0.000785373	1.18424e-06	1.53311e-06	1.15e-06	0.0368844	-8.64263	166	0.34307
sp|O35331|PDXK_RAT	Pyridoxal kinase OS=Rattus norvegicus OX=10116 GN=Pdxk PE=1 SV=1	0.00124317	0.00111181	0.00160779	0.00222933	0.00171647	0.00194544	0.0375081	0.572062	167	0.346781
sp|P41542|USO1_RAT	General vesicular transport factor p115 OS=Rattus norvegicus OX=10116 GN=Uso1 PE=1 SV=1	0.000288894	0.000271287	0.00033846	0.000195269	0.00023513	0.000241116	0.0375928	-0.420326	168	0.345496
sp|Q6IFV4|K1C13_RAT	Keratin, type I cytoskeletal 13 OS=Rattus norvegicus OX=10116 GN=Krt13 PE=3 SV=1	0.000126507	0.000131996	6.73689e-05	6.10774e-05	1.53311e-06	1.15e-06	0.0382984	-2.35357	169	0.349898
sp|P15800|LAMB2_RAT	Laminin subunit beta-2 OS=Rattus norvegicus OX=10116 GN=Lamb2 PE=1 SV=1	0.000415344	0.000497569	0.000458752	0.000386202	0.000250405	0.000320974	0.0395144	-0.518461	170	0.358884
sp|Q9Z1Y3|CADH2_RAT	Cadherin-2 OS=Rattus norvegicus OX=10116 GN=Cdh2 PE=1 SV=1	0.000428112	0.000542408	0.000455967	0.00035433	0.000279996	0.000382831	0.0415188	-0.487925	171	0.374884
sp|Q4QQV8|CHMP5_RAT	Charged multivesicular body protein 5 OS=Rattus norvegicus OX=10116 GN=Chmp5 PE=2 SV=1	0.00113856	0.00118796	0.000538951	0.000366464	0.000386113	0.000263961	0.0438046	-1.49511	172	0.393222
sp|Q6MG60|DDAH2_RAT	N(G),N(G)-dimethylarginine dimethylaminohydrolase 2 OS=Rattus norvegicus OX=10116 GN=Ddah2 PE=1 SV=1	0.000874894	0.000811429	0.000828283	0.000563198	0.000197798	0.0006085	0.0438902	-0.876687	173	0.391714
sp|Q9WV78|PLVAP_RAT	Plasmalemma vesicle-associated protein OS=Rattus norvegicus OX=10116 GN=Plvap PE=1 SV=1	0.000126507	0.000263992	0.000269476	0.000122155	1.53311e-06	1.15e-06	0.0445532	-2.40235	174	0.395345
sp|P07323|ENOG_RAT	Gamma-enolase OS=Rattus norvegicus OX=10116 GN=Eno2 PE=1 SV=2	0.000255345	0.000266425	0.000271959	0.000862965	0.000714397	0.000399591	0.0447695	1.31656	175	0.394995
sp|P27590|UROM_RAT	Uromodulin OS=Rattus norvegicus OX=10116 GN=Umod PE=2 SV=1	0.000731342	0.000942624	0.000916385	0.000706184	0.000525209	0.000628342	0.0451669	-0.478051	176	0.396237
sp|P27321|ICAL_RAT	Calpastatin OS=Rattus norvegicus OX=10116 GN=Cast PE=1 SV=3	7.77138e-05	8.1086e-05	0.000206926	1.18424e-06	1.53311e-06	1.15e-06	0.047021	-6.56327	177	0.410172
sp|O88794|PNPO_RAT	Pyridoxine-5'-phosphate oxidase OS=Rattus norvegicus OX=10116 GN=Pnpo PE=1 SV=1	1.19469e-06	0.000443021	0.000452224	0.000614986	0.000971939	0.00110742	0.0456455	1.58766	178	0.395936
sp|P24473|GSTK1_RAT	Glutathione S-transferase kappa 1 OS=Rattus norvegicus OX=10116 GN=Gstk1 PE=1 SV=3	0.000490353	0.000255815	0.000261129	0.000591856	0.000623589	0.000511571	0.0464144	0.777791	179	0.400356
sp|Q9JHL4|DBNL_RAT	Drebrin-like protein OS=Rattus norvegicus OX=10116 GN=Dbnl PE=1 SV=1	0.000762522	0.000729309	0.000406068	0.00024543	0.000323237	0.000331465	0.0466795	-1.07619	180	0.400407
sp|P21263|NEST_RAT	Nestin OS=Rattus norvegicus OX=10116 GN=Nes PE=1 SV=2	1.19469e-06	1.92202e-06	1.26969e-06	2.8264e-05	5.95588e-05	0.000106881	0.0500223	5.4721	181	0.42671
sp|Q5M9G3|CAPR1_RAT	Caprin-1 OS=Rattus norvegicus OX=10116 GN=Caprin1 PE=1 SV=2	0.00011756	0.000163548	0.000125209	7.56772e-05	7.97347e-05	1.15e-06	0.0465282	-1.37587	182	0.394723
sp|P38659|PDIA4_RAT	Protein disulfide-isomerase A4 OS=Rattus norvegicus OX=10116 GN=Pdia4 PE=1 SV=2	8.61741e-05	0.00026974	0.000275343	0.000416048	0.000526026	0.000359611	0.0474923	1.04408	183	0.4007
sp|P01041|CYTB_RAT	Cystatin-B OS=Rattus norvegicus OX=10116 GN=Cstb PE=1 SV=1	0.00169622	0.000884913	0.000602196	1.18424e-06	0.000287615	1.15e-06	0.0476235	-3.45667	184	0.399623
sp|Q6PCT3|TPD54_RAT	Tumor protein D54 OS=Rattus norvegicus OX=10116 GN=Tpd52l2 PE=1 SV=1	0.00163711	0.00170815	0.00134125	0.0013376	0.00102495	0.00105105	0.0478651	-0.457224	185	0.39948
sp|P14659|HSP72_RAT	Heat shock-related 70 kDa protein 2 OS=Rattus norvegicus OX=10116 GN=Hspa2 PE=1 SV=2	0.000481445	0.000639337	0.000559386	0.000422621	1.53311e-06	0.000136985	0.0477665	-1.58218	186	0.396513
sp|Q64319|SLC31_RAT	Neutral and basic amino acid transport protein rBAT OS=Rattus norvegicus OX=10116 GN=Slc3a1 PE=1 SV=1	0.000973528	0.00105809	0.00116648	0.000822533	0.000453951	0.000804058	0.0480013	-0.620256	187	0.396332
sp|P41562|IDHC_RAT	Isocitrate dehydrogenase [NADP] cytoplasmic OS=Rattus norvegicus OX=10116 GN=Idh1 PE=1 SV=1	0.00107072	0.00111718	0.00114039	0.00200316	0.00142974	0.00146613	0.048447	0.557712	188	0.397884
sp|P15999|ATPA_RAT	ATP synthase subunit alpha, mitochondrial OS=Rattus norvegicus OX=10116 GN=Atp5f1a PE=1 SV=2	0.00511014	0.00475687	0.00581614	0.00682101	0.00754351	0.00595846	0.0492157	0.373896	189	0.402059
sp|P38650|DYHC1_RAT	Cytoplasmic dynein 1 heavy chain 1 OS=Rattus norvegicus OX=10116 GN=Dync1h1 PE=1 SV=1	4.17603e-05	3.11231e-05	3.81235e-05	4.60842e-05	7.28326e-05	6.22389e-05	0.0492965	0.706581	190	0.400599
sp|O89049|TRXR1_RAT	Thioredoxin reductase 1, cytoplasmic OS=Rattus norvegicus OX=10116 GN=Txnrd1 PE=1 SV=5	0.000111042	0.00011586	1.26969e-06	0.000321666	0.000451883	0.00086885	0.0495245	2.84761	191	0.400345
sp|Q62835|RABE2_RAT	Rab GTPase-binding effector protein 2 OS=Rattus norvegicus OX=10116 GN=Rabep2 PE=1 SV=1	0.000450081	0.000313074	0.000479365	0.000241443	0.000305266	0.000208691	0.05022	-0.717955	192	0.403852
sp|P11915|SCP2_RAT	Sterol carrier protein 2 OS=Rattus norvegicus OX=10116 GN=Scp2 PE=1 SV=3	0.000861032	0.00121547	0.000701277	0.000489066	0.000463759	1.15e-06	0.050433	-1.54191	193	0.403464
sp|O35264|PA1B2_RAT	Platelet-activating factor acetylhydrolase IB subunit alpha2 OS=Rattus norvegicus OX=10116 GN=Pafah1b2 PE=1 SV=1	0.000120982	0.000252464	0.000257708	1.18424e-06	1.53311e-06	0.000126217	0.0519017	-2.29135	194	0.413073
sp|Q5M9I5|QCR6_RAT	Cytochrome b-c1 complex subunit 6, mitochondrial OS=Rattus norvegicus OX=10116 GN=Uqcrh PE=3 SV=1	0.00404679	0.00357279	0.00331546	0.00210408	0.00316699	0.00259809	0.0524665	-0.474677	195	0.415427
sp|Q63342|M2GD_RAT	Dimethylglycine dehydrogenase, mitochondrial OS=Rattus norvegicus OX=10116 GN=Dmgdh PE=1 SV=1	9.69836e-05	6.74613e-05	0.000103294	0.000187295	0.000263115	0.000134907	0.05261	1.12839	196	0.414438
sp|P01026|CO3_RAT	Complement C3 OS=Rattus norvegicus OX=10116 GN=C3 PE=1 SV=3	3.33193e-05	6.95301e-05	1.77436e-05	0.000144779	0.000135592	6.9522e-05	0.0536965	1.53677	197	0.420849
sp|Q6P9T8|TBB4B_RAT	Tubulin beta-4B chain OS=Rattus norvegicus OX=10116 GN=Tubb4b PE=1 SV=1	0.00242808	0.00272832	0.00305022	0.0021642	0.00228023	0.00227333	0.0538596	-0.288806	198	0.419996
sp|O35413|SRBS2_RAT	Sorbin and SH3 domain-containing protein 2 OS=Rattus norvegicus OX=10116 GN=Sorbs2 PE=1 SV=2	0.000231647	0.000145019	0.000148031	0.000111839	9.42683e-05	7.25011e-05	0.0550992	-0.913247	199	0.427504
sp|O70511|ANK3_RAT	Ankyrin-3 OS=Rattus norvegicus OX=10116 GN=Ank3 PE=1 SV=3	0.000105664	0.000132298	0.000112538	0.00014284	0.000236498	0.000198424	0.0556366	0.72106	200	0.429515
sp|Q66HD0|ENPL_RAT	Endoplasmin OS=Rattus norvegicus OX=10116 GN=Hsp90b1 PE=1 SV=2	0.000585802	0.000647175	0.000110103	0.000865111	0.000911495	0.000934698	0.0559296	1.01344	201	0.429628
sp|Q9JK25|CLIP1_RAT	CAP-Gly domain-containing linker protein 1 OS=Rattus norvegicus OX=10116 GN=Clip1 PE=1 SV=2	4.19772e-05	0.000131396	6.70627e-05	1.18424e-06	2.13532e-05	1.15e-06	0.0581547	-3.34346	202	0.444509
sp|P09495|TPM4_RAT	Tropomyosin alpha-4 chain OS=Rattus norvegicus OX=10116 GN=Tpm4 PE=1 SV=3	0.00357483	0.00384652	0.00261761	0.00248102	0.00238674	0.00186476	0.0581945	-0.576392	203	0.442622
sp|P08025|IGF1_RAT	Insulin-like growth factor I OS=Rattus norvegicus OX=10116 GN=Igf1 PE=1 SV=3	0.000543235	0.000188936	0.00019286	1.18424e-06	1.53311e-06	1.15e-06	0.0591513	-7.90201	204	0.447694
sp|P63004|LIS1_RAT	Platelet-activating factor acetylhydrolase IB subunit alpha OS=Rattus norvegicus OX=10116 GN=Pafah1b1 PE=1 SV=2	6.75731e-05	1.92202e-06	1.26969e-06	6.52485e-05	0.000206241	0.000211491	0.0596024	2.77086	205	0.448908
sp|Q8VI04|ASGL1_RAT	Isoaspartyl peptidase/L-asparaginase OS=Rattus norvegicus OX=10116 GN=Asrgl1 PE=1 SV=1	0.000665585	0.000781274	0.000886114	0.000642688	0.00050786	0.000347192	0.0592224	-0.639382	206	0.44388
sp|Q7TPB1|TCPD_RAT	T-complex protein 1 subunit delta OS=Rattus norvegicus OX=10116 GN=Cct4 PE=2 SV=3	0.000102801	0.000107262	0.00021898	4.96325e-05	1.53311e-06	5.36248e-05	0.0598759	-2.03362	207	0.446611
sp|F1MA98|TPR_RAT	Nucleoprotein TPR OS=Rattus norvegicus OX=10116 GN=Tpr PE=1 SV=1	0.000293485	0.00030622	0.000225058	0.00020404	0.00017915	7.34841e-05	0.0604082	-0.852815	208	0.448415
sp|P85968|6PGD_RAT	6-phosphogluconate dehydrogenase, decarboxylating OS=Rattus norvegicus OX=10116 GN=Pgd PE=1 SV=1	0.000172081	5.98492e-05	0.000122185	0.000332322	0.00017507	0.000359053	0.0606898	1.29089	209	0.448349
sp|Q60587|ECHB_RAT	Trifunctional enzyme subunit beta, mitochondrial OS=Rattus norvegicus OX=10116 GN=Hadhb PE=1 SV=1	0.000699915	0.000852	0.000621212	0.000844797	0.00100877	0.0010953	0.060821	0.440388	210	0.44718
sp|P16086|SPTN1_RAT	Spectrin alpha chain, non-erythrocytic 1 OS=Rattus norvegicus OX=10116 GN=Sptan1 PE=1 SV=2	0.00304844	0.00346137	0.00313936	0.00283536	0.00287335	0.00238526	0.0610992	-0.253558	211	0.447095
sp|Q4FZV0|MANBA_RAT	Beta-mannosidase OS=Rattus norvegicus OX=10116 GN=Manba PE=2 SV=1	0.000345919	0.000164059	0.000401919	9.10961e-05	0.000159967	1.15e-06	0.0613831	-1.85423	212	0.447054
sp|P24368|PPIB_RAT	Peptidyl-prolyl cis-trans isomerase B OS=Rattus norvegicus OX=10116 GN=Ppib PE=1 SV=3	0.000641319	0.000401488	0.000273218	0.000743108	0.00143541	0.000936696	0.0615267	1.24314	213	0.445997
sp|Q4KLP0|DHTK1_RAT	Probable 2-oxoglutarate dehydrogenase E1 component DHKTD1, mitochondrial OS=Rattus norvegicus OX=10116 GN=Dhtkd1 PE=2 SV=1	3.01141e-05	3.14208e-05	1.26969e-06	0.000116313	0.000153186	0.000345588	0.0622779	3.29185	214	0.449332
sp|D4A7N1|MIC25_RAT	MICOS complex subunit Mic25 OS=Rattus norvegicus OX=10116 GN=Chchd6 PE=1 SV=1	0.000318448	0.000443021	0.000452224	1.18424e-06	0.00032398	1.15e-06	0.0632059	-1.89507	215	0.453906
sp|P62890|RL30_RAT	60S ribosomal protein L30 OS=Rattus norvegicus OX=10116 GN=Rpl30 PE=3 SV=2	0.000240913	1.92202e-06	0.000513175	0.000930501	0.000490195	0.00100535	0.0632704	1.68213	216	0.452266
sp|Q62627|PAWR_RAT	PRKC apoptosis WT1 regulator protein OS=Rattus norvegicus OX=10116 GN=Pawr PE=1 SV=1	0.000584141	8.70697e-05	0.00053327	1.18424e-06	1.53311e-06	1.15e-06	0.0643489	-8.28285	217	0.457856
sp|Q71UE8|NEDD8_RAT	NEDD8 OS=Rattus norvegicus OX=10116 GN=Nedd8 PE=1 SV=1	0.000684073	1.92202e-06	1.26969e-06	0.00165135	0.000695956	0.00107051	0.0643791	2.31414	218	0.455969
sp|P01835|KACB_RAT	Ig kappa chain C region, B allele OS=Rattus norvegicus OX=10116 PE=1 SV=1	0.00287504	0.00436334	0.00250536	0.00126188	0.00212726	0.00163606	0.06438	-0.955294	219	0.453894
sp|Q6AYT0|QOR_RAT	Quinone oxidoreductase OS=Rattus norvegicus OX=10116 GN=Cryz PE=2 SV=1	0.00151577	0.00131796	0.000986576	0.00227676	0.00188479	0.00158136	0.0649142	0.588095	220	0.455579
sp|Q920Q0|PALM_RAT	Paralemmin-1 OS=Rattus norvegicus OX=10116 GN=Palm PE=1 SV=1	0.0013744	0.00105666	0.00100156	0.000698483	0.000956713	0.000603734	0.06726	-0.603671	221	0.469907
sp|P45592|COF1_RAT	Cofilin-1 OS=Rattus norvegicus OX=10116 GN=Cfl1 PE=1 SV=3	0.00250346	0.00174139	0.00195532	0.00338428	0.00305634	0.00243767	0.0674748	0.517971	222	0.469284
sp|P62243|RS8_RAT	40S ribosomal protein S8 OS=Rattus norvegicus OX=10116 GN=Rps8 PE=1 SV=2	0.000532788	0.000277953	0.000283727	0.00051446	0.000677553	0.000833762	0.0675422	0.888244	223	0.467647
sp|B2GV06|SCOT1_RAT	Succinyl-CoA:3-ketoacid coenzyme A transferase 1, mitochondrial OS=Rattus norvegicus OX=10116 GN=Oxct1 PE=1 SV=1	0.0010123	0.000611497	0.00085118	0.00113181	0.0012467	0.0010561	0.068165	0.472732	224	0.469851
sp|P13676|ACPH_RAT	Acylamino-acid-releasing enzyme OS=Rattus norvegicus OX=10116 GN=Apeh PE=1 SV=1	0.000340635	0.000197453	0.000282176	0.000402009	0.000346552	0.000434346	0.0685519	0.528176	225	0.470418
sp|Q63797|PSME1_RAT	Proteasome activator complex subunit 1 OS=Rattus norvegicus OX=10116 GN=Psme1 PE=2 SV=1	0.00155771	0.00127702	0.00154056	0.00128925	0.00113198	0.000928635	0.0689333	-0.385277	226	0.470943
sp|Q6QLM7|KIF5A_RAT	Kinesin heavy chain isoform 5A OS=Rattus norvegicus OX=10116 GN=Kif5a PE=1 SV=1	5.39532e-05	1.92202e-06	2.87318e-05	0.000104194	5.48904e-05	0.000140719	0.0690214	1.82517	227	0.469467
sp|P97532|THTM_RAT	3-mercaptopyruvate sulfurtransferase OS=Rattus norvegicus OX=10116 GN=Mpst PE=1 SV=3	0.000652979	0.000486652	0.000794817	0.000900737	0.00123374	0.000875871	0.0696346	0.638008	228	0.47156
sp|P49134|ITB1_RAT	Integrin beta-1 OS=Rattus norvegicus OX=10116 GN=Itgb1 PE=2 SV=1	0.000485444	0.000542687	0.000406237	0.000301336	0.000388046	0.0001447	0.0699616	-0.782156	229	0.471706
sp|Q05175|BASP1_RAT	Brain acid soluble protein 1 OS=Rattus norvegicus OX=10116 GN=Basp1 PE=1 SV=2	0.0023927	0.00131396	0.00214601	0.0013376	0.00102495	0.000525523	0.0702893	-1.01899	230	0.471855
sp|P02634|S100G_RAT	Protein S100-G OS=Rattus norvegicus OX=10116 GN=S100g PE=1 SV=3	0.000701392	0.000731827	0.000747028	0.000677263	0.000356788	0.00036587	0.070495	-0.639145	231	0.471187
sp|Q9JJ54|HNRPD_RAT	Heterogeneous nuclear ribonucleoprotein D0 OS=Rattus norvegicus OX=10116 GN=Hnrnpd PE=1 SV=2	0.000941812	0.00040945	0.000417954	0.000227353	0.000159695	1.15e-06	0.0709306	-2.18824	232	0.472055
sp|P0C5H9|MANF_RAT	Mesencephalic astrocyte-derived neurotrophic factor OS=Rattus norvegicus OX=10116 GN=Manf PE=1 SV=1	0.0026312	0.00161492	0.00181332	0.00134507	0.00125972	0.00113031	0.0710211	-0.698037	233	0.470629
sp|Q9ESS6|BCAM_RAT	Basal cell adhesion molecule OS=Rattus norvegicus OX=10116 GN=Bcam PE=2 SV=1	0.000310793	0.000509581	0.000283727	0.000214358	0.000180681	1.15e-06	0.0721735	-1.47861	234	0.476222
sp|Q62764|YBOX3_RAT	Y-box-binding protein 3 OS=Rattus norvegicus OX=10116 GN=Ybx3 PE=1 SV=1	0.000613961	0.000400376	0.000653908	0.00044463	0.000156156	8.00658e-05	0.0728936	-1.29292	235	0.478927
sp|Q9JI85|NUCB2_RAT	Nucleobindin-2 OS=Rattus norvegicus OX=10116 GN=Nucb2 PE=1 SV=1	0.00125332	0.000894745	0.00133487	0.00076434	0.000805321	0.00089464	0.0730903	-0.499124	236	0.478184
sp|Q9QWN8|SPTN2_RAT	Spectrin beta chain, non-erythrocytic 2 OS=Rattus norvegicus OX=10116 GN=Sptbn2 PE=1 SV=2	0.000116017	0.000121052	0.000197706	8.96211e-05	7.08197e-05	1.15e-06	0.0732194	-1.42792	237	0.477007
sp|Q5SGE0|LPPRC_RAT	Leucine-rich PPR motif-containing protein, mitochondrial OS=Rattus norvegicus OX=10116 GN=Lrpprc PE=1 SV=1	7.9612e-05	8.30665e-05	6.35939e-05	0.00011531	0.000121492	0.000207642	0.0749738	0.973941	238	0.486385
sp|Q91ZN1|COR1A_RAT	Coronin-1A OS=Rattus norvegicus OX=10116 GN=Coro1a PE=1 SV=3	1.19469e-06	1.92202e-06	1.26969e-06	0.00011606	0.000122283	0.000376188	0.0765349	7.1303	239	0.494435
sp|Q1JU68|EIF3A_RAT	Eukaryotic translation initiation factor 3 subunit A OS=Rattus norvegicus OX=10116 GN=Eif3a PE=2 SV=2	0.000245539	0.000234844	0.000283308	0.000177819	0.000166536	0.000234816	0.0752225	-0.398997	240	0.483932
sp|P62752|RL23A_RAT	60S ribosomal protein L23a OS=Rattus norvegicus OX=10116 GN=Rpl23a PE=2 SV=1	0.000355192	1.92202e-06	0.000189151	0.000342973	0.000722724	0.000555841	0.0751601	1.56969	241	0.481523
sp|P18666|ML12B_RAT	Myosin regulatory light chain 12B OS=Rattus norvegicus OX=10116 GN=Myl12b PE=1 SV=3	0.00112753	0.000840324	0.000857779	0.000466603	0.000819367	0.000504135	0.0765511	-0.658529	242	0.488408
sp|Q9WTV5|PSMD9_RAT	26S proteasome non-ATPase regulatory subunit 9 OS=Rattus norvegicus OX=10116 GN=Psmd9 PE=1 SV=1	0.000374391	0.00052085	0.000664585	0.000723024	0.000888755	0.00130197	0.0778846	0.901492	243	0.494872
sp|Q99P39|NFS1_RAT	Cysteine desulfurase, mitochondrial OS=Rattus norvegicus OX=10116 GN=Nfs1 PE=2 SV=1	0.00024572	1.92202e-06	1.26969e-06	0.000296584	0.000249989	0.000512705	0.0782055	2.08937	244	0.494874
sp|O35889|AFAD_RAT	Afadin OS=Rattus norvegicus OX=10116 GN=Afdn PE=1 SV=1	0.000227214	0.000205464	0.000193598	7.31326e-05	0.000169518	0.00015803	0.0782009	-0.644344	245	0.492825
sp|P42930|HSPB1_RAT	Heat shock protein beta-1 OS=Rattus norvegicus OX=10116 GN=Hspb1 PE=1 SV=1	0.00040347	0.000841956	0.000716204	1.18424e-06	0.000273653	0.000420928	0.078112	-1.49538	246	0.490264
sp|O88656|ARC1B_RAT	Actin-related protein 2/3 complex subunit 1B OS=Rattus norvegicus OX=10116 GN=Arpc1b PE=1 SV=3	0.000148951	0.000233122	0.000317286	0.000431482	0.000378847	0.000310793	0.078595	0.680838	247	0.491298
sp|P24483|ADX_RAT	Adrenodoxin, mitochondrial OS=Rattus norvegicus OX=10116 GN=Fdx1 PE=2 SV=1	0.000442101	0.000461284	0.000156955	0.000142297	0.000149927	1.15e-06	0.0801111	-1.85371	248	0.498756
sp|Q4QRB4|TBB3_RAT	Tubulin beta-3 chain OS=Rattus norvegicus OX=10116 GN=Tubb3 PE=1 SV=1	0.00123133	0.00154171	0.00163931	0.00089173	0.00106481	0.00128461	0.08017	-0.445042	249	0.497118
sp|A0A0G2K2P5|ZO1_RAT	Tight junction protein ZO-1 OS=Rattus norvegicus OX=10116 GN=Tjp1 PE=1 SV=1	0.000219756	0.000180158	0.0001839	7.57844e-05	0.000175665	4.91282e-05	0.0802932	-0.957772	250	0.495891
sp|P62902|RL31_RAT	60S ribosomal protein L31 OS=Rattus norvegicus OX=10116 GN=Rpl31 PE=2 SV=1	0.00044328	0.000231257	0.000236061	0.000214015	1.53311e-06	1.15e-06	0.080826	-2.07113	251	0.497192
sp|B5DFC9|NID2_RAT	Nidogen-2 OS=Rattus norvegicus OX=10116 GN=Nid2 PE=2 SV=1	0.000754147	0.000621214	0.000655254	0.000574898	0.000545149	0.00035198	0.0816353	-0.464113	252	0.500178
sp|Q01205|ODO2_RAT	Dihydrolipoyllysine-residue succinyltransferase component of 2-oxoglutarate dehydrogenase complex, mitochondrial OS=Rattus norvegicus OX=10116 GN=Dlst PE=1 SV=2	0.00164765	0.00178282	0.00175486	0.00182667	0.00198669	0.00222826	0.0823946	0.220502	253	0.502835
sp|Q63556|SPA3M_RAT	Serine protease inhibitor A3M (Fragment) OS=Rattus norvegicus OX=10116 GN=Serpina3m PE=2 SV=1	0.00013449	7.0163e-05	7.16204e-05	0.000194795	0.000136826	0.000140309	0.0826538	0.77248	254	0.502431
sp|P12368|KAP2_RAT	cAMP-dependent protein kinase type II-alpha regulatory subunit OS=Rattus norvegicus OX=10116 GN=Prkar2a PE=1 SV=4	0.000483628	0.000576701	0.000515095	0.000266852	0.000492029	0.000288317	0.0835568	-0.589207	255	0.505929
sp|P11960|ODBA_RAT	2-oxoisovalerate dehydrogenase subunit alpha, mitochondrial (Fragment) OS=Rattus norvegicus OX=10116 GN=Bckdha PE=1 SV=1	0.000565408	0.00072104	0.000535285	0.00109191	0.000766972	0.000786497	0.0839198	0.538166	256	0.506141
sp|P10111|PPIA_RAT	Peptidyl-prolyl cis-trans isomerase A OS=Rattus norvegicus OX=10116 GN=Ppia PE=1 SV=2	0.00439225	0.00458284	0.00305871	0.00489364	0.00515602	0.00546351	0.084058	0.366401	257	0.505002
sp|P56571|ES1_RAT	ES1 protein homolog, mitochondrial OS=Rattus norvegicus OX=10116 PE=1 SV=2	0.001354	0.000543367	0.000554654	0.000301713	0.000211927	1.15e-06	0.0844308	-2.25192	258	0.505276
sp|Q66H45|TTC36_RAT	Tetratricopeptide repeat protein 36 OS=Rattus norvegicus OX=10116 GN=Ttc36 PE=1 SV=1	0.00163847	0.000932489	0.000951858	0.000287655	0.000757694	0.000621586	0.0844689	-1.07953	259	0.503552
sp|P62961|YBOX1_RAT	Y-box-binding protein 1 OS=Rattus norvegicus OX=10116 GN=Ybx1 PE=2 SV=3	0.00103248	0.000628416	0.00137458	0.000664644	0.000437674	0.000179526	0.0854536	-1.2437	260	0.507463
sp|Q3KRE8|TBB2B_RAT	Tubulin beta-2B chain OS=Rattus norvegicus OX=10116 GN=Tubb2b PE=1 SV=1	0.00199227	0.0025984	0.00265237	0.00198385	0.00183686	0.00194857	0.0855186	-0.328204	261	0.505903
sp|Q63570|PRS6B_RAT	26S proteasome regulatory subunit 6B OS=Rattus norvegicus OX=10116 GN=Psmc4 PE=1 SV=1	0.000994197	0.000622403	0.000776515	0.000639998	0.000472018	0.000345739	0.0858997	-0.715142	262	0.506218
[truncated: 1,281 more rows]
