# Supplementary material for: Proteome-wide analysis of protein alterations in response to aristolochic acids in rat kidney and liver tissues
Source: Royal Society of Chemistry journal article supplement (doi:10.1039/d1mo00015b), 2021-05-06
Supplement: d1mo00015b2.pdf [file d1mo00015b2.pdf]

## **Proteome-wide analysis of protein alterations in response to aristolochic acids in rat kidney and liver tissues**

Jingjing Liu<sup>1,2,\*</sup>, Wei Dong<sup>1</sup>, Tin Yan Wong<sup>3</sup>, Chengchao Qiu<sup>1</sup>, Jing Wu<sup>1,4</sup>, Jian Zhao<sup>1</sup>, Jinqiang Xia<sup>2</sup>,

Shaofei Xie<sup>2</sup>, Xiaofeng Song<sup>1,\*</sup>

<sup>1</sup> Department of Biomedical Engineering, Nanjing University of Aeronautics and Astronautics, Nanjing 210016, China

<sup>2</sup> The State Key Laboratory of Translational Medicine and Innovative Drug Development, Jiangsu Simcere pharmaceutical Co., Ltd., Nanjing 210016, China

<sup>3</sup> Department of Chemical and Biological Engineering, The Hong Kong University of Science and Technology, Clear Water Bay, Kowloon, Hong Kong

<sup>4</sup> School of Biomedical Engineering and Informatics, Nanjing Medical University, Nanjing, Jiangsu, 211166, China

\*Corresponding authors: [jjliu@nuaa.edu.cn](mailto:jjliu@nuaa.edu.cn); [xfsong@nuaa.edu.cn](mailto:xfsong@nuaa.edu.cn).

Fig.S-1 Correlation of the spectral counts between biological replicates of control group and AAs treated group in kidney (A) and liver (B). Within group there are four biological replicates with six combinations, every two replicates were compared and the reproducibility was evaluated.

**A**

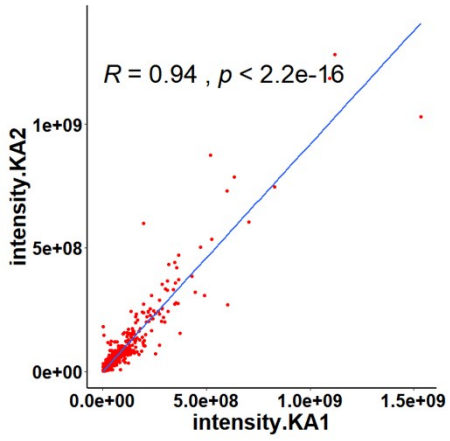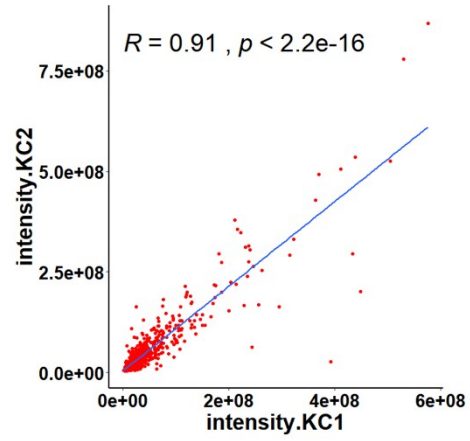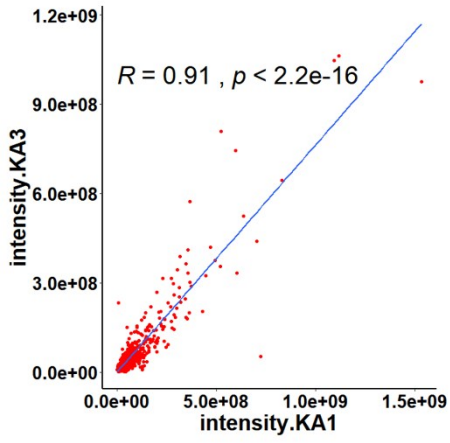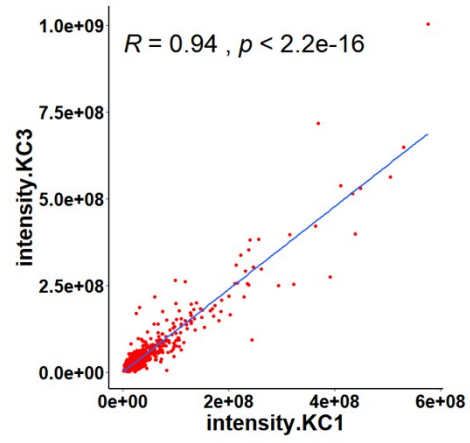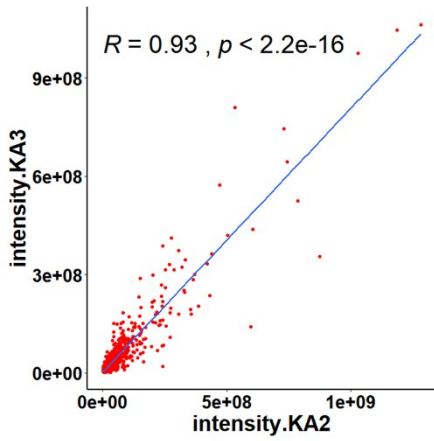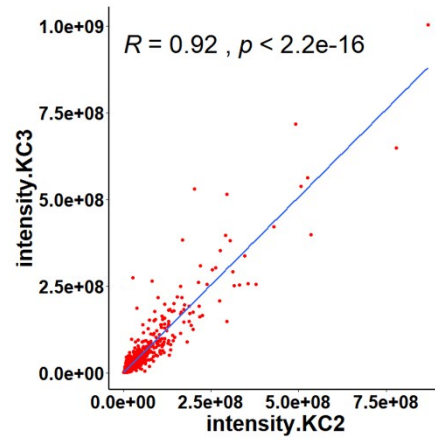

**B**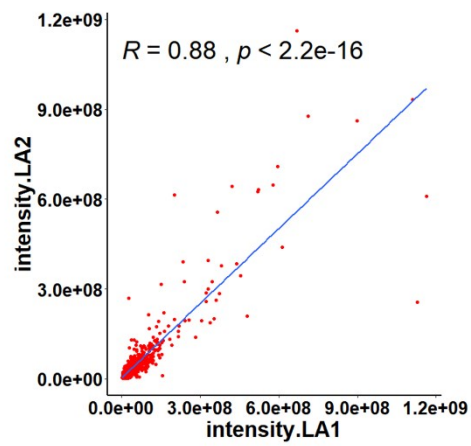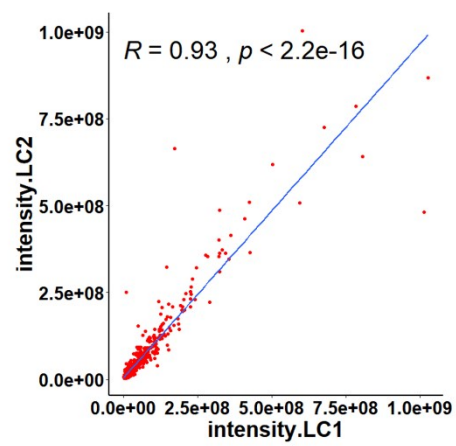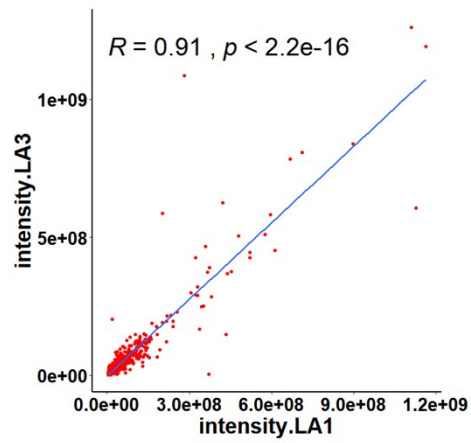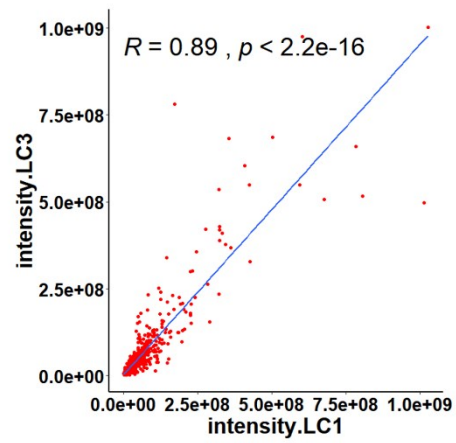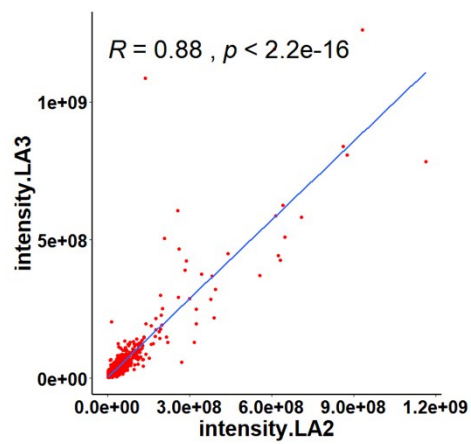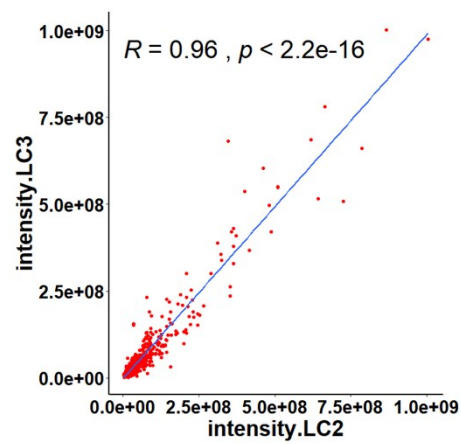

Table.S1 Proteins with fold change larger or lower than  $\pm 2$ , p-values below 0.05 and FDR  $< 0.01$  in kidney and liver.

| Uniprot ID | Protein name                                             | Fold change | P-value  | FDR      | Organ  |
|------------|----------------------------------------------------------|-------------|----------|----------|--------|
| Q5U1Y4     | 1,5-anhydro-D-fructose reductase                         | 1.71E-02    | 3.10E-06 | 1.69E-03 | Liver  |
| D3ZQL7     | Tubulin polymerization-promoting protein                 | 1.24E-02    | 3.00E-06 | 2.46E-03 | Liver  |
| O35162     | Heat shock 70 kDa protein                                | 7.19E+01    | 9.41E-06 | 3.86E-03 | Liver  |
| Q99MS0     | SEC14-like protein 2                                     | 1.15E-02    | 2.98E-06 | 4.89E-03 | Liver  |
| Q9Z250     | Protein lin-7 homolog A                                  | 1.04E-02    | 7.29E-07 | 2.25E-04 | Kidney |
| Q5XIE3     | 39S ribosomal protein L11, mitochondrial                 | 9.12E-03    | 7.24E-07 | 2.80E-04 | Kidney |
| P83941     | Elongin-C                                                | 3.41E+02    | 1.59E-06 | 3.51E-04 | Kidney |
| Q3MIE4     | Synaptic vesicle membrane protein VAT-1 homolog          | 6.05E-03    | 7.14E-07 | 3.67E-04 | Kidney |
| P12001     | 60S ribosomal protein L18                                | 1.02E+02    | 1.65E-06 | 4.24E-04 | Kidney |
| Q3SWU3     | Heterogeneous nuclear ribonucleoprotein D-like           | 7.23E-03    | 7.18E-07 | 5.54E-04 | Kidney |
| Q5PQP1     | RNA-binding motif, single-stranded-interacting protein 1 | 1.81E-02    | 7.61E-07 | 1.17E-03 | Kidney |
| P82995     | Heat shock protein HSP 90-alpha                          | 2.48E+00    | 1.46E-05 | 2.82E-03 | Kidney |
| Q10758     | Keratin, type II cytoskeletal 8                          | 3.83E-01    | 5.72E-05 | 8.83E-03 | Kidney |
| P36972     | Adenine phosphoribosyltransferase                        | 4.59E+02    | 5.24E-05 | 8.98E-03 | Kidney |
